# Supplementary material
Source: publisher figshare collection journal article supplement (https://acs.figshare.com/ndownloader/files/4188610)
Supplement: Supplementary file 1 [file 4188610]

## Sheet: pr201048c_005
Header	--------------------------------------------------------
Search title	110328_WaxPromix10ulA10_NH4OH80ACN_1D
Timestamp	2011-05-03T11:13:57Z
User	Newman_DTA2MGF_Script
Email	sksze@ntu.edu.sg
Report URI	http://MascotXP.student.main.ntu.edu.sg/mascot/cgi/master_results.pl?file=../data/20110503/F015836.dat
Peak list data path	C:\TempX1\110328_WaxPromix10ulA10_NH4OH80ACN_1D.Mascot
Peak list format	Mascot generic
Search type	MIS
Mascot version	2.2.07
Database	SwissProt
Fasta file	SwissProt_20091126.fasta
Total sequences	512994
Total residues	180531504
Sequences after taxonomy filter	512994
Number of queries	6576
Variable modifications	--------------------------------------------------------
Identifier	Name	Delta	Neutral loss(es)
1	Oxidation (M)	15.9949	0
2	Phospho (ST)	79.9663	97.9769	0
3	Phospho (Y)	79.9663	0
4	Deamidated (NQ)	0.984009	0
Search Parameters	--------------------------------------------------------
Taxonomy filter	All entries
Enzyme	Trypsin
Maximum Missed Cleavages	2
Fixed modifications	Carbamidomethyl (C)
Quantitation method	None
Variable modifications	Oxidation (M),Phospho (ST),Phospho (Y),Deamidated (NQ)
Peptide Mass Tolerance	5.1
Peptide Mass Tolerance Units	ppm
Fragment Mass Tolerance	0.8
Fragment Mass Tolerance Units	Da
Mass values	Monoisotopic
Instrument type	ESI-TRAP
Isotope error mode	2
Decoy database also searched	0
Format parameters	--------------------------------------------------------
Significance threshold	0.05
Max. number of hits	0
Use MudPIT protein scoring	1
Ions score cut-off	20
Include same-set proteins	0
Include sub-set proteins	0
Include unassigned	1
Require bold red	0
Protein hits	--------------------------------------------------------
prot_hit_num	prot_acc	prot_desc	prot_score	prot_mass	pep_query	pep_rank	pep_isbold	pep_exp_mz	pep_exp_mr	pep_exp_z	pep_calc_mr	pep_delta	pep_start	pep_end	pep_miss	pep_score	pep_homol	pep_ident	pep_expect	pep_res_before	pep_seq	pep_res_after	pep_frame	pep_var_mod	pep_var_mod_pos	pep_num_match	pep_scan_title
1	ALBU_BOVIN	Serum albumin OS=Bos taurus GN=ALB PE=1 SV=4	13543	71244	246	1	1	545.338	544.331	1	544.333	-0.0022	101	105	0	23.39	32	44	6.1	K	VASLR	E				4	110328_WaxPromix10ulA10_NH4OH80ACN.341.341.1.dta
1					247	1	1	545.338	544.331	1	544.333	-0.0022	101	105	0	30.35	35	44	1.2	K	VASLR	E				4	110328_WaxPromix10ulA10_NH4OH80ACN.386.386.1.dta
1					248	1	1	545.338	544.331	1	544.333	-0.0022	101	105	0	21.54	31	44	9.4	K	VASLR	E				4	110328_WaxPromix10ulA10_NH4OH80ACN.564.564.1.dta
1					249	1	1	545.339	544.331	1	544.333	-0.002	101	105	0	21.47	31	44	9.4	K	VASLR	E				4	110328_WaxPromix10ulA10_NH4OH80ACN.297.297.1.dta
1					250	1	1	545.339	544.331	1	544.333	-0.0019	101	105	0	27.62	32	44	2.3	K	VASLR	E				4	110328_WaxPromix10ulA10_NH4OH80ACN.608.608.1.dta
1					251	1	1	545.339	544.332	1	544.333	-0.0017	101	105	0	21.53	31	44	9.3	K	VASLR	E				4	110328_WaxPromix10ulA10_NH4OH80ACN.520.520.1.dta
1					252	1	1	545.339	544.332	1	544.333	-0.0016	101	105	0	25.72	31	44	3.5	K	VASLR	E				4	110328_WaxPromix10ulA10_NH4OH80ACN.431.431.1.dta
1					253	1	1	545.339	544.332	1	544.333	-0.0013	101	105	0	30.3	35	44	1.2	K	VASLR	E				4	110328_WaxPromix10ulA10_NH4OH80ACN.476.476.1.dta
1					255	1	1	545.339	544.332	1	544.333	-0.0012	101	105	0	27.53	32	44	2.3	K	VASLR	E				4	110328_WaxPromix10ulA10_NH4OH80ACN.653.653.1.dta
1					256	1	1	545.34	544.332	1	544.333	-0.001	101	105	0	20.96	33	44	11	K	VASLR	E				3	110328_WaxPromix10ulA10_NH4OH80ACN.254.254.1.dta
1					322	1	1	609.287	608.28	1	608.281	-0.0006	524	528	0	28.53		35	0.27	K	AFDEK	L				5	110328_WaxPromix10ulA10_NH4OH80ACN.2819.2819.1.dta
1					323	1	1	609.287	608.28	1	608.281	-0.0005	524	528	0	28.57		35	0.27	K	AFDEK	L				3	110328_WaxPromix10ulA10_NH4OH80ACN.2764.2764.1.dta
1					324	1	1	609.288	608.281	1	608.281	0	524	528	0	28.5		35	0.26	K	AFDEK	L				5	110328_WaxPromix10ulA10_NH4OH80ACN.2713.2713.1.dta
1					427	1	1	660.355	659.348	1	659.349	-0.0013	490	495	0	31.61	37	38	0.25	K	TPVSEK	V				6	110328_WaxPromix10ulA10_NH4OH80ACN.2029.2029.1.dta
1					428	1	1	660.356	659.348	1	659.349	-0.0005	490	495	0	25.95	29	39	1.1	K	TPVSEK	V				7	110328_WaxPromix10ulA10_NH4OH80ACN.2093.2093.1.dta
1					429	1	1	660.357	659.35	1	659.349	0.0005	490	495	0	28.86	29	39	0.58	K	TPVSEK	V				7	110328_WaxPromix10ulA10_NH4OH80ACN.1982.1982.1.dta
1					470	1	1	689.371	688.364	1	688.366	-0.0018	236	241	0	20.41	32	37	2.3	K	AWSVAR	L				3	110328_WaxPromix10ulA10_NH4OH80ACN.557.557.1.dta
1					471	1	1	689.371	688.364	1	688.366	-0.0017	236	241	0	23.46	33	37	1.1	K	AWSVAR	L				3	110328_WaxPromix10ulA10_NH4OH80ACN.897.897.1.dta
1					473	1	1	689.372	688.364	1	688.366	-0.0014	236	241	0	20.28	31	37	2.4	K	AWSVAR	L				3	110328_WaxPromix10ulA10_NH4OH80ACN.601.601.1.dta
1					474	1	1	689.372	688.364	1	688.366	-0.0013	236	241	0	20.2	31	37	2.4	K	AWSVAR	L				3	110328_WaxPromix10ulA10_NH4OH80ACN.644.644.1.dta
1					476	1	1	689.372	688.365	1	688.366	-0.0009	236	241	0	20.55	32	37	2.2	K	AWSVAR	L				3	110328_WaxPromix10ulA10_NH4OH80ACN.687.687.1.dta
1					497	1	1	353.68	705.346	2	705.348	-0.0019	223	228	0	36.37		39	0.1	R	CASIQK	F				5	110328_WaxPromix10ulA10_NH4OH80ACN.1312.1312.2.dta
1					498	2	1	353.68	705.346	2	705.348	-0.0018	223	228	0	39.46		39	0.052	R	CASIQK	F				5	110328_WaxPromix10ulA10_NH4OH80ACN.1475.1475.2.dta
1					499	3	1	353.68	705.346	2	705.348	-0.0018	223	228	0	39.43		39	0.052	R	CASIQK	F				5	110328_WaxPromix10ulA10_NH4OH80ACN.1527.1527.2.dta
1					500	2	1	353.68	705.346	2	705.348	-0.0018	223	228	0	24.68		39	1.5	R	CASIQK	F				5	110328_WaxPromix10ulA10_NH4OH80ACN.1629.1629.2.dta
1					501	3	1	353.68	705.346	2	705.348	-0.0017	223	228	0	33.11		39	0.22	R	CASIQK	F				5	110328_WaxPromix10ulA10_NH4OH80ACN.1421.1421.2.dta
1					502	1	1	706.354	705.346	1	705.348	-0.0016	223	228	0	27.39	34	39	0.83	R	CASIQK	F				4	110328_WaxPromix10ulA10_NH4OH80ACN.1390.1390.1.dta
1					504	1	1	706.354	705.346	1	705.348	-0.0014	223	228	0	24.58	31	39	1.6	R	CASIQK	F				4	110328_WaxPromix10ulA10_NH4OH80ACN.1442.1442.1.dta
1					505	2	1	353.68	705.346	2	705.348	-0.0014	223	228	0	41.74		39	0.03	R	CASIQK	F				5	110328_WaxPromix10ulA10_NH4OH80ACN.1368.1368.2.dta
1					506	2	1	353.681	705.347	2	705.348	-0.0013	223	228	0	44.02		39	0.018	R	CASIQK	F				5	110328_WaxPromix10ulA10_NH4OH80ACN.1583.1583.2.dta
1					507	2	1	353.681	705.347	2	705.348	-0.0013	223	228	0	29.22		39	0.54	R	CASIQK	F				4	110328_WaxPromix10ulA10_NH4OH80ACN.1857.1857.2.dta
1					508	1	1	706.354	705.347	1	705.348	-0.0012	223	228	0	31.59	34	39	0.33	R	CASIQK	F				5	110328_WaxPromix10ulA10_NH4OH80ACN.1337.1337.1.dta
1					509	3	1	353.681	705.347	2	705.348	-0.0012	223	228	0	32.53		39	0.27	R	CASIQK	F				4	110328_WaxPromix10ulA10_NH4OH80ACN.1263.1263.2.dta
1					510	3	1	353.681	705.347	2	705.348	-0.0011	223	228	0	24.15	35	39	1.8	R	CASIQK	F				5	110328_WaxPromix10ulA10_NH4OH80ACN.1684.1684.2.dta
1					511	1	1	706.354	705.347	1	705.348	-0.001	223	228	0	22.84	31	39	2.5	R	CASIQK	F				4	110328_WaxPromix10ulA10_NH4OH80ACN.1282.1282.1.dta
1					513	1	1	706.354	705.347	1	705.348	-0.0009	223	228	0	27.59	30	39	0.83	R	CASIQK	F				4	110328_WaxPromix10ulA10_NH4OH80ACN.1494.1494.1.dta
1					514	1	1	353.681	705.347	2	705.348	-0.0008	223	228	0	27.03	38	39	0.95	R	CASIQK	F				5	110328_WaxPromix10ulA10_NH4OH80ACN.1740.1740.2.dta
1					519	1	1	356.69	711.365	2	711.366	-0.0015	29	34	0	31.76	34	36	0.16	K	SEIAHR	F				5	110328_WaxPromix10ulA10_NH4OH80ACN.1817.1817.2.dta
1					520	1	1	356.69	711.365	2	711.366	-0.0012	29	34	0	30.23	33	36	0.23	K	SEIAHR	F				5	110328_WaxPromix10ulA10_NH4OH80ACN.1874.1874.2.dta
1					521	1	1	356.69	711.365	2	711.366	-0.0011	29	34	0	26.82	33	36	0.5	K	SEIAHR	F				5	110328_WaxPromix10ulA10_NH4OH80ACN.1933.1933.2.dta
1					522	1	1	356.69	711.366	2	711.366	-0.0006	29	34	0	30.19	33	36	0.23	K	SEIAHR	F				5	110328_WaxPromix10ulA10_NH4OH80ACN.1764.1764.2.dta
1					623	1	1	376.682	751.349	2	751.35	-0.0014	341	346	0	38.2		37	0.04	K	NYQEAK	D				5	110328_WaxPromix10ulA10_NH4OH80ACN.2395.2395.2.dta
1					624	1	1	376.682	751.349	2	751.35	-0.0012	341	346	0	38.09		37	0.041	K	NYQEAK	D				5	110328_WaxPromix10ulA10_NH4OH80ACN.2335.2335.2.dta
1					625	1	1	376.682	751.349	2	751.35	-0.001	341	346	0	37.7		37	0.045	K	NYQEAK	D				5	110328_WaxPromix10ulA10_NH4OH80ACN.2282.2282.2.dta
1					626	1	1	752.357	751.35	1	751.35	-0.0004	341	346	0	27.29	24	37	0.58	K	NYQEAK	D				7	110328_WaxPromix10ulA10_NH4OH80ACN.2336.2336.1.dta
1					627	1	1	752.357	751.35	1	751.35	-0.0004	341	346	0	27.33	23	37	0.58	K	NYQEAK	D				7	110328_WaxPromix10ulA10_NH4OH80ACN.2396.2396.1.dta
1					628	1	1	752.358	751.35	1	751.35	0.0003	341	346	0	23.65	27	37	1.3	K	NYQEAK	D				6	110328_WaxPromix10ulA10_NH4OH80ACN.2283.2283.1.dta
1					631	2	1	377.174	752.333	2	752.334	-0.0011	341	346	0	35.25		36	0.069	K	NYQEAK	D		Deamidated (NQ)	0.400000.0	5	110328_WaxPromix10ulA10_NH4OH80ACN.4084.4084.2.dta
1					632	1	1	377.174	752.333	2	752.334	-0.0008	341	346	0	40.74		36	0.02	K	NYQEAK	D		Deamidated (NQ)	0.400000.0	5	110328_WaxPromix10ulA10_NH4OH80ACN.4128.4128.2.dta
1					653	1	1	758.42	757.412	1	757.416	-0.0033	198	204	0	31.09	29	31	0.06	K	GACLLPK	I				4	110328_WaxPromix10ulA10_NH4OH80ACN.499.499.1.dta
1					654	1	1	758.42	757.412	1	757.416	-0.0032	198	204	0	28.58	28	31	0.11	K	GACLLPK	I				4	110328_WaxPromix10ulA10_NH4OH80ACN.543.543.1.dta
1					655	1	1	379.714	757.413	2	757.416	-0.003	198	204	0	35.77		35	0.048	K	GACLLPK	I				5	110328_WaxPromix10ulA10_NH4OH80ACN.542.542.2.dta
1					656	1	1	379.714	757.413	2	757.416	-0.003	198	204	0	32.55		35	0.1	K	GACLLPK	I				5	110328_WaxPromix10ulA10_NH4OH80ACN.498.498.2.dta
1					657	1	1	379.714	757.413	2	757.416	-0.0027	198	204	0	38.23		35	0.027	K	GACLLPK	I				8	110328_WaxPromix10ulA10_NH4OH80ACN.409.409.2.dta
1					658	1	1	758.42	757.413	1	757.416	-0.0027	198	204	0	30.91	29	35	0.15	K	GACLLPK	I				4	110328_WaxPromix10ulA10_NH4OH80ACN.411.411.1.dta
1					659	1	1	379.714	757.413	2	757.416	-0.0024	198	204	0	35.45		35	0.052	K	GACLLPK	I				8	110328_WaxPromix10ulA10_NH4OH80ACN.586.586.2.dta
1					660	1	1	379.714	757.413	2	757.416	-0.0024	198	204	0	35.41		35	0.052	K	GACLLPK	I				8	110328_WaxPromix10ulA10_NH4OH80ACN.454.454.2.dta
1					661	1	1	379.714	757.413	2	757.416	-0.0023	198	204	0	38.08		35	0.028	K	GACLLPK	I				8	110328_WaxPromix10ulA10_NH4OH80ACN.630.630.2.dta
1					662	1	1	379.714	757.413	2	757.416	-0.0022	198	204	0	33.85		35	0.075	K	GACLLPK	I				8	110328_WaxPromix10ulA10_NH4OH80ACN.806.806.2.dta
1					663	1	1	758.421	757.413	1	757.416	-0.0022	198	204	0	28.68	28	35	0.25	K	GACLLPK	I				4	110328_WaxPromix10ulA10_NH4OH80ACN.587.587.1.dta
1					664	1	1	758.421	757.413	1	757.416	-0.0021	198	204	0	28.49	27	35	0.26	K	GACLLPK	I				4	110328_WaxPromix10ulA10_NH4OH80ACN.455.455.1.dta
1					665	1	1	379.714	757.414	2	757.416	-0.002	198	204	0	30.97		35	0.14	K	GACLLPK	I				4	110328_WaxPromix10ulA10_NH4OH80ACN.849.849.2.dta
1					666	1	1	379.714	757.414	2	757.416	-0.002	198	204	0	38.02		35	0.029	K	GACLLPK	I				8	110328_WaxPromix10ulA10_NH4OH80ACN.365.365.2.dta
1					667	1	1	758.421	757.414	1	757.416	-0.002	198	204	0	27.3	27	35	0.34	K	GACLLPK	I				8	110328_WaxPromix10ulA10_NH4OH80ACN.631.631.1.dta
1					668	1	1	379.714	757.414	2	757.416	-0.002	198	204	0	37.98		35	0.029	K	GACLLPK	I				8	110328_WaxPromix10ulA10_NH4OH80ACN.892.892.2.dta
1					669	1	1	379.714	757.414	2	757.416	-0.0019	198	204	0	31.38		35	0.13	K	GACLLPK	I				8	110328_WaxPromix10ulA10_NH4OH80ACN.763.763.2.dta
1					670	1	1	379.714	757.414	2	757.416	-0.0019	198	204	0	30.23		35	0.17	K	GACLLPK	I				5	110328_WaxPromix10ulA10_NH4OH80ACN.1449.1449.2.dta
1					671	1	1	379.714	757.414	2	757.416	-0.0019	198	204	0	30.41		35	0.15	K	GACLLPK	I				4	110328_WaxPromix10ulA10_NH4OH80ACN.674.674.2.dta
1					672	1	1	379.714	757.414	2	757.416	-0.0017	198	204	0	34.24		35	0.064	K	GACLLPK	I				6	110328_WaxPromix10ulA10_NH4OH80ACN.719.719.2.dta
1					673	1	1	379.714	757.414	2	757.416	-0.0017	198	204	0	31.57		35	0.12	K	GACLLPK	I				6	110328_WaxPromix10ulA10_NH4OH80ACN.1281.1281.2.dta
1					674	1	1	379.714	757.414	2	757.416	-0.0015	198	204	0	26.91		35	0.37	K	GACLLPK	I				4	110328_WaxPromix10ulA10_NH4OH80ACN.936.936.2.dta
1					675	1	1	758.421	757.414	1	757.416	-0.0015	198	204	0	31.14	29	35	0.14	K	GACLLPK	I				4	110328_WaxPromix10ulA10_NH4OH80ACN.366.366.1.dta
1					676	1	1	379.714	757.414	2	757.416	-0.0014	198	204	0	35.35		35	0.053	K	GACLLPK	I				5	110328_WaxPromix10ulA10_NH4OH80ACN.1371.1371.2.dta
1					677	1	1	379.714	757.414	2	757.416	-0.0011	198	204	0	33.14		35	0.079	K	GACLLPK	I				5	110328_WaxPromix10ulA10_NH4OH80ACN.321.321.2.dta
1					678	1	1	758.422	757.415	1	757.416	-0.001	198	204	0	28.16	27	35	0.25	K	GACLLPK	I				4	110328_WaxPromix10ulA10_NH4OH80ACN.764.764.1.dta
1					679	1	1	758.422	757.415	1	757.416	-0.001	198	204	0	31.09	29	35	0.13	K	GACLLPK	I				4	110328_WaxPromix10ulA10_NH4OH80ACN.675.675.1.dta
1					680	1	1	379.715	757.415	2	757.416	-0.001	198	204	0	28.64		35	0.22	K	GACLLPK	I				8	110328_WaxPromix10ulA10_NH4OH80ACN.1168.1168.2.dta
1					681	1	1	758.422	757.415	1	757.416	-0.0009	198	204	0	30.83	29	35	0.13	K	GACLLPK	I				4	110328_WaxPromix10ulA10_NH4OH80ACN.720.720.1.dta
1					682	1	1	379.715	757.415	2	757.416	-0.0007	198	204	0	30.29		35	0.15	K	GACLLPK	I				8	110328_WaxPromix10ulA10_NH4OH80ACN.281.281.2.dta
1					683	1	1	379.715	757.415	2	757.416	-0.0006	198	204	0	35.83		35	0.043	K	GACLLPK	I				5	110328_WaxPromix10ulA10_NH4OH80ACN.1223.1223.2.dta
1					684	1	1	758.423	757.415	1	757.416	-0.0002	198	204	0	21.68	24	35	1.1	K	GACLLPK	I				6	110328_WaxPromix10ulA10_NH4OH80ACN.1048.1048.1.dta
1					685	1	1	758.423	757.415	1	757.416	-0.0001	198	204	0	20.82	22	35	1.4	K	GACLLPK	I				4	110328_WaxPromix10ulA10_NH4OH80ACN.1252.1252.1.dta
1					686	1	1	758.423	757.416	1	757.416	0	198	204	0	21.72	24	37	1.8	K	GACLLPK	I				8	110328_WaxPromix10ulA10_NH4OH80ACN.282.282.1.dta
1					687	1	1	758.423	757.416	1	757.416	0	198	204	0	30.87	30	37	0.22	K	GACLLPK	I				4	110328_WaxPromix10ulA10_NH4OH80ACN.322.322.1.dta
1					688	1	1	758.424	757.417	1	757.416	0.0012	198	204	0	29.17	29	37	0.31	K	GACLLPK	I				7	110328_WaxPromix10ulA10_NH4OH80ACN.1094.1094.1.dta
1					689	1	1	758.424	757.417	1	757.416	0.0012	198	204	0	26.89	30	37	0.53	K	GACLLPK	I				8	110328_WaxPromix10ulA10_NH4OH80ACN.1139.1139.1.dta
1					690	1	1	758.424	757.417	1	757.416	0.0016	198	204	0	28.79	29	37	0.34	K	GACLLPK	I				8	110328_WaxPromix10ulA10_NH4OH80ACN.1196.1196.1.dta
1					747	1	1	395.238	788.461	2	788.464	-0.0039	257	263	0	49.15		39	0.0059	K	LVTDLTK	V				9	110328_WaxPromix10ulA10_NH4OH80ACN.1419.1419.2.dta
1					748	1	1	395.238	788.461	2	788.464	-0.0038	257	263	0	42.97		39	0.024	K	LVTDLTK	V				6	110328_WaxPromix10ulA10_NH4OH80ACN.1580.1580.2.dta
1					749	1	1	395.238	788.461	2	788.464	-0.0038	257	263	0	44.24		39	0.018	K	LVTDLTK	V				6	110328_WaxPromix10ulA10_NH4OH80ACN.1526.1526.2.dta
1					750	1	1	395.238	788.461	2	788.464	-0.0038	257	263	0	49.28		39	0.0057	K	LVTDLTK	V				9	110328_WaxPromix10ulA10_NH4OH80ACN.1472.1472.2.dta
1					751	1	1	395.238	788.461	2	788.464	-0.0035	257	263	0	44.42		39	0.017	K	LVTDLTK	V				6	110328_WaxPromix10ulA10_NH4OH80ACN.1364.1364.2.dta
1					752	1	1	395.238	788.462	2	788.464	-0.0025	257	263	0	55.05		39	0.0013	K	LVTDLTK	V				6	110328_WaxPromix10ulA10_NH4OH80ACN.1625.1625.2.dta
1					753	1	1	395.238	788.462	2	788.464	-0.0024	257	263	0	37.13		39	0.081	K	LVTDLTK	V				6	110328_WaxPromix10ulA10_NH4OH80ACN.1310.1310.2.dta
1					754	1	1	789.47	788.462	1	788.464	-0.0019	257	263	0	38.33		39	0.062	K	LVTDLTK	V				5	110328_WaxPromix10ulA10_NH4OH80ACN.1559.1559.1.dta
1					756	1	1	789.47	788.463	1	788.464	-0.0016	257	263	0	36.06		40	0.13	K	LVTDLTK	V				5	110328_WaxPromix10ulA10_NH4OH80ACN.1397.1397.1.dta
1					757	7	1	789.47	788.463	1	788.464	-0.0015	257	263	0	31.37		40	0.37	K	LVTDLTK	V				5	110328_WaxPromix10ulA10_NH4OH80ACN.1451.1451.1.dta
1					758	1	1	789.47	788.463	1	788.464	-0.0014	257	263	0	35.99		40	0.13	K	LVTDLTK	V				5	110328_WaxPromix10ulA10_NH4OH80ACN.1504.1504.1.dta
1					759	1	1	395.239	788.463	2	788.464	-0.0011	257	263	0	23.03	32	40	2.5	K	LVTDLTK	V				6	110328_WaxPromix10ulA10_NH4OH80ACN.1261.1261.2.dta
1					760	1	1	395.239	788.463	2	788.464	-0.001	257	263	0	36.63		40	0.11	K	LVTDLTK	V				5	110328_WaxPromix10ulA10_NH4OH80ACN.1681.1681.2.dta
1					761	1	1	395.239	788.463	2	788.464	-0.0009	257	263	0	33.32	38	40	0.24	K	LVTDLTK	V				4	110328_WaxPromix10ulA10_NH4OH80ACN.1739.1739.2.dta
1					762	1	1	395.239	788.463	2	788.464	-0.0009	257	263	0	30.6	39	40	0.44	K	LVTDLTK	V				6	110328_WaxPromix10ulA10_NH4OH80ACN.1854.1854.2.dta
1					763	1	1	789.471	788.464	1	788.464	-0.0008	257	263	0	36.12		40	0.12	K	LVTDLTK	V				5	110328_WaxPromix10ulA10_NH4OH80ACN.1344.1344.1.dta
1					764	1	1	395.239	788.464	2	788.464	-0.0007	257	263	0	23.36	31	40	2.3	K	LVTDLTK	V				6	110328_WaxPromix10ulA10_NH4OH80ACN.1796.1796.2.dta
1					766	1	1	789.472	788.465	1	788.464	0.0002	257	263	0	25.17	37	39	1.5	K	LVTDLTK	V				7	110328_WaxPromix10ulA10_NH4OH80ACN.1294.1294.1.dta
1					875	1	1	409.715	817.416	2	817.418	-0.002	562	568	0	47.03		40	0.011	K	ATEEQLK	T				6	110328_WaxPromix10ulA10_NH4OH80ACN.2644.2644.2.dta
1					876	1	1	409.715	817.416	2	817.418	-0.0019	562	568	0	48.85		40	0.0074	K	ATEEQLK	T				6	110328_WaxPromix10ulA10_NH4OH80ACN.2699.2699.2.dta
1					877	1	1	409.716	817.417	2	817.418	-0.0015	562	568	0	41.67		40	0.037	K	ATEEQLK	T				6	110328_WaxPromix10ulA10_NH4OH80ACN.2814.2814.2.dta
1					878	1	1	409.716	817.417	2	817.418	-0.0011	562	568	0	48.8		40	0.0075	K	ATEEQLK	T				6	110328_WaxPromix10ulA10_NH4OH80ACN.2757.2757.2.dta
1					879	1	1	409.716	817.417	2	817.418	-0.0008	562	568	0	39.1		40	0.07	K	ATEEQLK	T				6	110328_WaxPromix10ulA10_NH4OH80ACN.2871.2871.2.dta
1					880	1	1	409.716	817.417	2	817.418	-0.0007	562	568	0	41.67		40	0.038	K	ATEEQLK	T				6	110328_WaxPromix10ulA10_NH4OH80ACN.2536.2536.2.dta
1					881	1	1	818.425	817.418	1	817.418	-0.0005	562	568	0	24.03	33	40	2.2	K	ATEEQLK	T				5	110328_WaxPromix10ulA10_NH4OH80ACN.2599.2599.1.dta
1					882	1	1	409.716	817.418	2	817.418	-0.0005	562	568	0	41		40	0.045	K	ATEEQLK	T				6	110328_WaxPromix10ulA10_NH4OH80ACN.2588.2588.2.dta
1					883	1	1	818.426	817.418	1	817.418	0.0003	562	568	0	22.98	35	40	2.8	K	ATEEQLK	T				4	110328_WaxPromix10ulA10_NH4OH80ACN.2666.2666.1.dta
1					950	1	1	420.154	838.293	2	838.295	-0.0017	581	587	0	20.21	28	34	1.3	K	CCAADDK	E				4	110328_WaxPromix10ulA10_NH4OH80ACN.4047.4047.2.dta
1					951	1	1	420.154	838.293	2	838.295	-0.0016	581	587	0	44.1		34	0.005	K	CCAADDK	E				6	110328_WaxPromix10ulA10_NH4OH80ACN.3854.3854.2.dta
1					952	1	1	420.154	838.293	2	838.295	-0.0015	581	587	0	44.92		34	0.0041	K	CCAADDK	E				6	110328_WaxPromix10ulA10_NH4OH80ACN.3900.3900.2.dta
1					953	1	1	420.154	838.294	2	838.295	-0.0009	581	587	0	39.06		34	0.018	K	CCAADDK	E				6	110328_WaxPromix10ulA10_NH4OH80ACN.3949.3949.2.dta
1					954	1	1	420.154	838.294	2	838.295	-0.0009	581	587	0	30.54		32	0.071	K	CCAADDK	E				6	110328_WaxPromix10ulA10_NH4OH80ACN.3999.3999.2.dta
1					955	1	1	420.154	838.294	2	838.295	-0.0007	581	587	0	28.4		31	0.11	K	CCAADDK	E				6	110328_WaxPromix10ulA10_NH4OH80ACN.3811.3811.2.dta
1					1086	1	1	443.709	885.404	2	885.408	-0.0042	131	138	0	56.69	36	38	0.00077	K	DDSPDLPK	L				7	110328_WaxPromix10ulA10_NH4OH80ACN.6150.6150.2.dta
1					1087	1	1	443.709	885.404	2	885.408	-0.0041	131	138	0	51.6	35	38	0.0025	K	DDSPDLPK	L				7	110328_WaxPromix10ulA10_NH4OH80ACN.6101.6101.2.dta
1					1088	1	1	443.709	885.404	2	885.408	-0.004	131	138	0	52.85	36	38	0.0019	K	DDSPDLPK	L				7	110328_WaxPromix10ulA10_NH4OH80ACN.6051.6051.2.dta
1					1089	1	1	443.71	885.405	2	885.408	-0.0032	131	138	0	48.3	35	38	0.0053	K	DDSPDLPK	L				7	110328_WaxPromix10ulA10_NH4OH80ACN.5999.5999.2.dta
1					1090	1	1	443.71	885.405	2	885.408	-0.0029	131	138	0	51.6	36	38	0.0027	K	DDSPDLPK	L				7	110328_WaxPromix10ulA10_NH4OH80ACN.6196.6196.2.dta
1					1091	1	1	443.71	885.406	2	885.408	-0.0021	131	138	0	30.02	28	39	0.4	K	DDSPDLPK	L				5	110328_WaxPromix10ulA10_NH4OH80ACN.6757.6757.2.dta
1					1093	1	1	443.71	885.406	2	885.408	-0.0019	131	138	0	56.63	36	38	0.00082	K	DDSPDLPK	L				7	110328_WaxPromix10ulA10_NH4OH80ACN.5949.5949.2.dta
1					1094	1	1	443.71	885.406	2	885.408	-0.0018	131	138	0	35.93	27	38	0.097	K	DDSPDLPK	L				7	110328_WaxPromix10ulA10_NH4OH80ACN.6856.6856.2.dta
1					1095	1	1	443.711	885.406	2	885.408	-0.0016	131	138	0	48.27	34	38	0.0057	K	DDSPDLPK	L				7	110328_WaxPromix10ulA10_NH4OH80ACN.6243.6243.2.dta
1					1096	1	1	443.711	885.406	2	885.408	-0.0015	131	138	0	29.71	33	39	0.48	K	DDSPDLPK	L				5	110328_WaxPromix10ulA10_NH4OH80ACN.6905.6905.2.dta
1					1097	1	1	443.711	885.407	2	885.408	-0.0013	131	138	0	21.83	27	39	2.8	K	DDSPDLPK	L				5	110328_WaxPromix10ulA10_NH4OH80ACN.6660.6660.2.dta
1					1099	1	1	443.711	885.407	2	885.408	-0.0012	131	138	0	55.16		39	0.0013	K	DDSPDLPK	L				7	110328_WaxPromix10ulA10_NH4OH80ACN.6288.6288.2.dta
1					1100	1	1	443.711	885.407	2	885.408	-0.0011	131	138	0	21.81	33	39	2.8	K	DDSPDLPK	L				4	110328_WaxPromix10ulA10_NH4OH80ACN.7190.7190.2.dta
1					1101	1	1	443.711	885.407	2	885.408	-0.001	131	138	0	52.75	38	39	0.0022	K	DDSPDLPK	L				7	110328_WaxPromix10ulA10_NH4OH80ACN.5901.5901.2.dta
1					1103	1	1	443.711	885.407	2	885.408	-0.0009	131	138	0	28.65	34	39	0.58	K	DDSPDLPK	L				6	110328_WaxPromix10ulA10_NH4OH80ACN.6561.6561.2.dta
1					1104	1	1	443.711	885.407	2	885.408	-0.0009	131	138	0	32.32	31	39	0.25	K	DDSPDLPK	L				10	110328_WaxPromix10ulA10_NH4OH80ACN.6808.6808.2.dta
1					1105	1	1	443.711	885.407	2	885.408	-0.0009	131	138	0	27.27	31	39	0.8	K	DDSPDLPK	L				6	110328_WaxPromix10ulA10_NH4OH80ACN.6385.6385.2.dta
1					1106	1	1	443.711	885.407	2	885.408	-0.0008	131	138	0	31.53	31	39	0.3	K	DDSPDLPK	L				6	110328_WaxPromix10ulA10_NH4OH80ACN.6520.6520.2.dta
1					1107	1	1	443.711	885.407	2	885.408	-0.0008	131	138	0	24.77	32	39	1.4	K	DDSPDLPK	L				6	110328_WaxPromix10ulA10_NH4OH80ACN.6472.6472.2.dta
1					1108	1	1	443.711	885.407	2	885.408	-0.0006	131	138	0	35.1	35	39	0.14	K	DDSPDLPK	L				6	110328_WaxPromix10ulA10_NH4OH80ACN.6337.6337.2.dta
1					1109	1	1	443.711	885.407	2	885.408	-0.0005	131	138	0	33.96	37	40	0.24	K	DDSPDLPK	L				6	110328_WaxPromix10ulA10_NH4OH80ACN.6610.6610.2.dta
1					1110	1	1	886.415	885.408	1	885.408	-0.0005	131	138	0	20.69	33	40	5	K	DDSPDLPK	L				9	110328_WaxPromix10ulA10_NH4OH80ACN.6292.6292.1.dta
1					1111	1	1	443.711	885.408	2	885.408	-0.0001	131	138	0	23.79	30	40	2.2	K	DDSPDLPK	L				6	110328_WaxPromix10ulA10_NH4OH80ACN.6430.6430.2.dta
1					1112	1	1	886.415	885.408	1	885.408	0	131	138	0	26.04	33	40	1.3	K	DDSPDLPK	L				5	110328_WaxPromix10ulA10_NH4OH80ACN.6127.6127.1.dta
1					1113	1	1	886.415	885.408	1	885.408	0.0001	131	138	0	35.67	33	40	0.14	K	DDSPDLPK	L				7	110328_WaxPromix10ulA10_NH4OH80ACN.6076.6076.1.dta
1					1114	1	1	886.416	885.409	1	885.408	0.0006	131	138	0	34.47	33	39	0.16	K	DDSPDLPK	L				8	110328_WaxPromix10ulA10_NH4OH80ACN.6026.6026.1.dta
1					1115	1	1	886.416	885.409	1	885.408	0.0009	131	138	0	32.57	33	39	0.26	K	DDSPDLPK	L				9	110328_WaxPromix10ulA10_NH4OH80ACN.6175.6175.1.dta
1					1116	1	1	886.417	885.409	1	885.408	0.0015	131	138	0	30.62	32	39	0.41	K	DDSPDLPK	L				5	110328_WaxPromix10ulA10_NH4OH80ACN.6222.6222.1.dta
1					1135	1	1	449.743	897.471	2	897.474	-0.0035	483	489	0	34.57		38	0.13	R	LCVLHEK	T				6	110328_WaxPromix10ulA10_NH4OH80ACN.1365.1365.2.dta
1					1136	1	1	449.743	897.471	2	897.474	-0.0033	483	489	0	38.05		38	0.06	R	LCVLHEK	T				6	110328_WaxPromix10ulA10_NH4OH80ACN.1309.1309.2.dta
1					1137	1	1	449.743	897.471	2	897.474	-0.0027	483	489	0	38.09		38	0.053	R	LCVLHEK	T				6	110328_WaxPromix10ulA10_NH4OH80ACN.1473.1473.2.dta
1					1138	1	1	449.743	897.472	2	897.474	-0.0023	483	489	0	34.2		38	0.13	R	LCVLHEK	T				6	110328_WaxPromix10ulA10_NH4OH80ACN.1627.1627.2.dta
1					1139	1	1	449.743	897.472	2	897.474	-0.0019	483	489	0	36.11		39	0.099	R	LCVLHEK	T				6	110328_WaxPromix10ulA10_NH4OH80ACN.1528.1528.2.dta
1					1140	1	1	449.743	897.472	2	897.474	-0.0018	483	489	0	33.15		38	0.19	R	LCVLHEK	T				6	110328_WaxPromix10ulA10_NH4OH80ACN.1908.1908.2.dta
1					1141	3	1	898.48	897.473	1	897.474	-0.0016	483	489	0	22.35		38	2.3	R	LCVLHEK	T				7	110328_WaxPromix10ulA10_NH4OH80ACN.1389.1389.1.dta
1					1142	1	1	449.744	897.473	2	897.474	-0.0016	483	489	0	23.51	31	38	1.8	R	LCVLHEK	T				6	110328_WaxPromix10ulA10_NH4OH80ACN.2080.2080.2.dta
1					1143	3	1	898.48	897.473	1	897.474	-0.0016	483	489	0	22.27		38	2.3	R	LCVLHEK	T				7	110328_WaxPromix10ulA10_NH4OH80ACN.1443.1443.1.dta
1					1144	2	1	898.48	897.473	1	897.474	-0.0015	483	489	0	22.32	34	38	2.3	R	LCVLHEK	T				7	110328_WaxPromix10ulA10_NH4OH80ACN.1333.1333.1.dta
1					1145	1	1	449.744	897.473	2	897.474	-0.0015	483	489	0	33.23		38	0.19	R	LCVLHEK	T				6	110328_WaxPromix10ulA10_NH4OH80ACN.1582.1582.2.dta
1					1146	1	1	449.744	897.473	2	897.474	-0.0015	483	489	0	39.38		38	0.045	R	LCVLHEK	T				6	110328_WaxPromix10ulA10_NH4OH80ACN.1254.1254.2.dta
1					1147	1	1	449.744	897.473	2	897.474	-0.0013	483	489	0	33.15	36	38	0.19	R	LCVLHEK	T				6	110328_WaxPromix10ulA10_NH4OH80ACN.1203.1203.2.dta
1					1148	1	1	898.48	897.473	1	897.474	-0.0012	483	489	0	23.08	35	38	1.9	R	LCVLHEK	T				4	110328_WaxPromix10ulA10_NH4OH80ACN.1549.1549.1.dta
1					1149	1	1	449.744	897.473	2	897.474	-0.001	483	489	0	34.21		38	0.14	R	LCVLHEK	T				6	110328_WaxPromix10ulA10_NH4OH80ACN.1800.1800.2.dta
1					1151	1	1	449.744	897.473	2	897.474	-0.0007	483	489	0	36.67		38	0.084	R	LCVLHEK	T				6	110328_WaxPromix10ulA10_NH4OH80ACN.1683.1683.2.dta
1					1152	1	1	449.744	897.473	2	897.474	-0.0007	483	489	0	38.56		38	0.054	R	LCVLHEK	T				6	110328_WaxPromix10ulA10_NH4OH80ACN.1741.1741.2.dta
1					1153	1	1	449.744	897.474	2	897.474	-0.0006	483	489	0	25	33	38	1.2	R	LCVLHEK	T				9	110328_WaxPromix10ulA10_NH4OH80ACN.1856.1856.2.dta
1					1184	1	1	461.746	921.477	2	921.481	-0.0041	249	256	0	51.62		39	0.0034	K	AEFVEVTK	L				12	110328_WaxPromix10ulA10_NH4OH80ACN.2169.2169.2.dta
1					1185	1	1	461.747	921.479	2	921.481	-0.0021	249	256	0	49.64		40	0.0064	K	AEFVEVTK	L				12	110328_WaxPromix10ulA10_NH4OH80ACN.2224.2224.2.dta
1					1186	1	1	461.747	921.479	2	921.481	-0.0014	249	256	0	49.53		40	0.0063	K	AEFVEVTK	L				12	110328_WaxPromix10ulA10_NH4OH80ACN.2392.2392.2.dta
1					1187	1	1	461.747	921.48	2	921.481	-0.0013	249	256	0	51.56		40	0.004	K	AEFVEVTK	L				12	110328_WaxPromix10ulA10_NH4OH80ACN.2280.2280.2.dta
1					1188	1	1	461.747	921.48	2	921.481	-0.0012	249	256	0	45.2	39	40	0.017	K	AEFVEVTK	L				11	110328_WaxPromix10ulA10_NH4OH80ACN.2780.2780.2.dta
1					1189	1	1	461.747	921.48	2	921.481	-0.0012	249	256	0	34.08	38	40	0.23	K	AEFVEVTK	L				11	110328_WaxPromix10ulA10_NH4OH80ACN.3733.3733.2.dta
1					1190	1	1	461.747	921.48	2	921.481	-0.0012	249	256	0	49.54		40	0.0064	K	AEFVEVTK	L				12	110328_WaxPromix10ulA10_NH4OH80ACN.2337.2337.2.dta
1					1192	1	1	461.747	921.48	2	921.481	-0.0011	249	256	0	29.55	36	39	0.53	K	AEFVEVTK	L				7	110328_WaxPromix10ulA10_NH4OH80ACN.3788.3788.2.dta
1					1193	1	1	922.487	921.48	1	921.481	-0.001	249	256	0	42.43		39	0.027	K	AEFVEVTK	L				5	110328_WaxPromix10ulA10_NH4OH80ACN.2254.2254.1.dta
1					1194	1	1	461.747	921.48	2	921.481	-0.001	249	256	0	48.64	38	39	0.0066	K	AEFVEVTK	L				12	110328_WaxPromix10ulA10_NH4OH80ACN.2729.2729.2.dta
1					1195	1	1	461.747	921.48	2	921.481	-0.001	249	256	0	48.79		39	0.0063	K	AEFVEVTK	L				6	110328_WaxPromix10ulA10_NH4OH80ACN.2556.2556.2.dta
1					1196	1	1	461.747	921.48	2	921.481	-0.0009	249	256	0	46.75		39	0.01	K	AEFVEVTK	L				12	110328_WaxPromix10ulA10_NH4OH80ACN.2671.2671.2.dta
1					1197	1	1	461.747	921.48	2	921.481	-0.0009	249	256	0	48.43		39	0.0069	K	AEFVEVTK	L				6	110328_WaxPromix10ulA10_NH4OH80ACN.2850.2850.2.dta
1					1198	1	1	461.747	921.48	2	921.481	-0.0009	249	256	0	49.51		39	0.005	K	AEFVEVTK	L				12	110328_WaxPromix10ulA10_NH4OH80ACN.2445.2445.2.dta
1					1199	1	1	461.747	921.48	2	921.481	-0.0008	249	256	0	37.69	38	39	0.073	K	AEFVEVTK	L				10	110328_WaxPromix10ulA10_NH4OH80ACN.2502.2502.2.dta
1					1200	1	1	461.747	921.48	2	921.481	-0.0007	249	256	0	37	35	39	0.086	K	AEFVEVTK	L				10	110328_WaxPromix10ulA10_NH4OH80ACN.3179.3179.2.dta
1					1201	1	1	461.748	921.48	2	921.481	-0.0003	249	256	0	48.79		39	0.0059	K	AEFVEVTK	L				7	110328_WaxPromix10ulA10_NH4OH80ACN.2061.2061.2.dta
1					1202	1	1	461.748	921.48	2	921.481	-0.0003	249	256	0	43.14	37	39	0.022	K	AEFVEVTK	L				9	110328_WaxPromix10ulA10_NH4OH80ACN.2961.2961.2.dta
1					1203	1	1	461.748	921.481	2	921.481	-0.0001	249	256	0	42.62		39	0.024	K	AEFVEVTK	L				9	110328_WaxPromix10ulA10_NH4OH80ACN.3653.3653.2.dta
1					1204	1	1	461.748	921.481	2	921.481	0.0002	249	256	0	47.99		39	0.0073	K	AEFVEVTK	L				11	110328_WaxPromix10ulA10_NH4OH80ACN.2614.2614.2.dta
1					1205	1	1	461.748	921.481	2	921.481	0.0006	249	256	0	27.06	33	39	0.85	K	AEFVEVTK	L				10	110328_WaxPromix10ulA10_NH4OH80ACN.3584.3584.2.dta
1					1206	1	1	922.489	921.481	1	921.481	0.0006	249	256	0	42.72		39	0.023	K	AEFVEVTK	L				5	110328_WaxPromix10ulA10_NH4OH80ACN.2195.2195.1.dta
1					1207	1	1	922.489	921.482	1	921.481	0.0008	249	256	0	45.8		39	0.013	K	AEFVEVTK	L				5	110328_WaxPromix10ulA10_NH4OH80ACN.2089.2089.1.dta
1					1208	1	1	922.49	921.482	1	921.481	0.0015	249	256	0	39.12		40	0.075	K	AEFVEVTK	L				5	110328_WaxPromix10ulA10_NH4OH80ACN.2314.2314.1.dta
1					1209	1	1	922.49	921.482	1	921.481	0.0016	249	256	0	42.65		40	0.033	K	AEFVEVTK	L				5	110328_WaxPromix10ulA10_NH4OH80ACN.2138.2138.1.dta
1					1216	1	1	464.248	926.482	2	926.486	-0.0045	161	167	0	39.64	38	39	0.044	K	YLYEIAR	R				6	110328_WaxPromix10ulA10_NH4OH80ACN.1276.1276.2.dta
1					1217	1	1	464.248	926.482	2	926.486	-0.004	161	167	0	44.07	37	38	0.015	K	YLYEIAR	R				6	110328_WaxPromix10ulA10_NH4OH80ACN.1331.1331.2.dta
1					1218	1	1	464.249	926.483	2	926.486	-0.0033	161	167	0	43.83		38	0.015	K	YLYEIAR	R				6	110328_WaxPromix10ulA10_NH4OH80ACN.1221.1221.2.dta
1					1219	1	1	464.249	926.484	2	926.486	-0.0024	161	167	0	40.77	35	38	0.031	K	YLYEIAR	R				6	110328_WaxPromix10ulA10_NH4OH80ACN.1388.1388.2.dta
1					1220	1	1	464.249	926.484	2	926.486	-0.0022	161	167	0	43.8	35	38	0.016	K	YLYEIAR	R				6	110328_WaxPromix10ulA10_NH4OH80ACN.1445.1445.2.dta
1					1221	1	1	464.25	926.484	2	926.486	-0.0017	161	167	0	30.11	32	38	0.36	K	YLYEIAR	R				6	110328_WaxPromix10ulA10_NH4OH80ACN.1500.1500.2.dta
1					1222	1	1	464.25	926.485	2	926.486	-0.0014	161	167	0	31.69	35	38	0.25	K	YLYEIAR	R				6	110328_WaxPromix10ulA10_NH4OH80ACN.1641.1641.2.dta
1					1223	1	1	464.25	926.485	2	926.486	-0.0009	161	167	0	38.76	36	38	0.047	K	YLYEIAR	R				5	110328_WaxPromix10ulA10_NH4OH80ACN.1166.1166.2.dta
1					1224	1	1	927.493	926.485	1	926.486	-0.0009	161	167	0	23.76	27	38	1.5	K	YLYEIAR	R				9	110328_WaxPromix10ulA10_NH4OH80ACN.1266.1266.1.dta
1					1225	1	1	927.493	926.485	1	926.486	-0.0007	161	167	0	25.31	24	38	0.98	K	YLYEIAR	R				5	110328_WaxPromix10ulA10_NH4OH80ACN.1320.1320.1.dta
1					1226	1	1	927.493	926.486	1	926.486	-0.0004	161	167	0	20.25	27	38	3.4	K	YLYEIAR	R				7	110328_WaxPromix10ulA10_NH4OH80ACN.1377.1377.1.dta
1					1227	1	1	927.494	926.486	1	926.486	0.0002	161	167	0	26.53	29	38	0.81	K	YLYEIAR	R				5	110328_WaxPromix10ulA10_NH4OH80ACN.1212.1212.1.dta
1					1228	1	1	927.495	926.488	1	926.486	0.0017	161	167	0	21.11	26	38	2.6	K	YLYEIAR	R				5	110328_WaxPromix10ulA10_NH4OH80ACN.1163.1163.1.dta
1					1294	1	1	487.731	973.448	2	973.451	-0.0024	37	44	0	44.84		40	0.017	K	DLGEEHFK	G				6	110328_WaxPromix10ulA10_NH4OH80ACN.2852.2852.2.dta
1					1295	1	1	487.732	973.449	2	973.451	-0.0015	37	44	0	33.39		39	0.22	K	DLGEEHFK	G				9	110328_WaxPromix10ulA10_NH4OH80ACN.2799.2799.2.dta
1					1296	1	1	487.732	973.449	2	973.451	-0.0013	37	44	0	32.48	37	39	0.27	K	DLGEEHFK	G				6	110328_WaxPromix10ulA10_NH4OH80ACN.3084.3084.2.dta
1					1297	1	1	487.732	973.45	2	973.451	-0.0007	37	44	0	30.99		40	0.49	K	DLGEEHFK	G				6	110328_WaxPromix10ulA10_NH4OH80ACN.2910.2910.2.dta
1					1298	1	1	487.732	973.45	2	973.451	-0.0007	37	44	0	27.17	33	40	1.2	K	DLGEEHFK	G				10	110328_WaxPromix10ulA10_NH4OH80ACN.3028.3028.2.dta
1					1299	1	1	487.732	973.45	2	973.451	-0.0005	37	44	0	29.28	39	40	0.71	K	DLGEEHFK	G				6	110328_WaxPromix10ulA10_NH4OH80ACN.2749.2749.2.dta
1					1300	1	1	487.733	973.451	2	973.451	0.0001	37	44	0	33.41		40	0.27	K	DLGEEHFK	G				6	110328_WaxPromix10ulA10_NH4OH80ACN.2969.2969.2.dta
1					1301	1	1	974.461	973.453	1	973.451	0.0027	37	44	0	30.88	36	40	0.47	K	DLGEEHFK	G				5	110328_WaxPromix10ulA10_NH4OH80ACN.2857.2857.1.dta
1					1302	1	1	974.461	973.453	1	973.451	0.0029	37	44	0	30.92		40	0.46	K	DLGEEHFK	G				5	110328_WaxPromix10ulA10_NH4OH80ACN.2806.2806.1.dta
1					1407	1	1	501.793	1001.57	2	1001.58	-0.0049	598	607	0	59.3	39	40	0.00066	K	LVVSTQTALA	-				7	110328_WaxPromix10ulA10_NH4OH80ACN.685.685.2.dta
1					1408	1	1	501.793	1001.57	2	1001.58	-0.0045	598	607	0	61.44	31	40	0.00037	K	LVVSTQTALA	-				7	110328_WaxPromix10ulA10_NH4OH80ACN.641.641.2.dta
1					1409	1	1	501.793	1001.57	2	1001.58	-0.0042	598	607	0	57.22	33	40	0.00099	K	LVVSTQTALA	-				12	110328_WaxPromix10ulA10_NH4OH80ACN.729.729.2.dta
1					1410	1	1	501.793	1001.57	2	1001.58	-0.0037	598	607	0	52.33	31	39	0.0027	K	LVVSTQTALA	-				11	110328_WaxPromix10ulA10_NH4OH80ACN.773.773.2.dta
1					1411	1	1	501.793	1001.57	2	1001.58	-0.0036	598	607	0	49.17	33	39	0.0055	K	LVVSTQTALA	-				7	110328_WaxPromix10ulA10_NH4OH80ACN.553.553.2.dta
1					1412	1	1	501.793	1001.57	2	1001.58	-0.0036	598	607	0	55.11	30	39	0.0014	K	LVVSTQTALA	-				7	110328_WaxPromix10ulA10_NH4OH80ACN.597.597.2.dta
1					1413	1	1	501.793	1001.57	2	1001.58	-0.0036	598	607	0	64.03	35	39	0.00018	K	LVVSTQTALA	-				7	110328_WaxPromix10ulA10_NH4OH80ACN.420.420.2.dta
1					1414	1	1	501.794	1001.57	2	1001.58	-0.003	598	607	0	59.17	29	39	0.00058	K	LVVSTQTALA	-				7	110328_WaxPromix10ulA10_NH4OH80ACN.375.375.2.dta
1					1415	1	1	501.794	1001.57	2	1001.58	-0.0028	598	607	0	59.45	30	41	0.00073	K	LVVSTQTALA	-				7	110328_WaxPromix10ulA10_NH4OH80ACN.509.509.2.dta
1					1416	1	1	501.794	1001.57	2	1001.58	-0.0028	598	607	0	53.69	32	41	0.0028	K	LVVSTQTALA	-				7	110328_WaxPromix10ulA10_NH4OH80ACN.465.465.2.dta
1					1418	1	1	501.794	1001.57	2	1001.58	-0.0027	598	607	0	67.12	33	41	0.00013	K	LVVSTQTALA	-				12	110328_WaxPromix10ulA10_NH4OH80ACN.817.817.2.dta
1					1419	1	1	501.794	1001.57	2	1001.58	-0.0025	598	607	0	34.83	24	41	0.21	K	LVVSTQTALA	-				7	110328_WaxPromix10ulA10_NH4OH80ACN.1557.1557.2.dta
1					1421	1	1	501.794	1001.57	2	1001.58	-0.0024	598	607	0	41.28	26	40	0.047	K	LVVSTQTALA	-				7	110328_WaxPromix10ulA10_NH4OH80ACN.906.906.2.dta
1					1425	1	1	501.794	1001.57	2	1001.58	-0.0022	598	607	0	55.33	35	40	0.0018	K	LVVSTQTALA	-				6	110328_WaxPromix10ulA10_NH4OH80ACN.863.863.2.dta
1					1426	1	1	501.794	1001.57	2	1001.58	-0.0021	598	607	0	28.79	30	40	0.83	K	LVVSTQTALA	-				7	110328_WaxPromix10ulA10_NH4OH80ACN.1323.1323.2.dta
1					1427	1	1	501.794	1001.57	2	1001.58	-0.002	598	607	0	37.35	26	40	0.11	K	LVVSTQTALA	-				7	110328_WaxPromix10ulA10_NH4OH80ACN.1381.1381.2.dta
1					1430	1	1	501.794	1001.57	2	1001.58	-0.0017	598	607	0	43.15	31	40	0.03	K	LVVSTQTALA	-				7	110328_WaxPromix10ulA10_NH4OH80ACN.331.331.2.dta
1					1431	1	1	501.794	1001.57	2	1001.58	-0.0014	598	607	0	41.68	27	41	0.043	K	LVVSTQTALA	-				7	110328_WaxPromix10ulA10_NH4OH80ACN.289.289.2.dta
1					1434	1	1	501.795	1001.57	2	1001.58	-0.0013	598	607	0	40.03	29	40	0.058	K	LVVSTQTALA	-				5	110328_WaxPromix10ulA10_NH4OH80ACN.951.951.2.dta
1					1437	1	1	501.795	1001.57	2	1001.58	-0.0013	598	607	0	44.87	30	40	0.019	K	LVVSTQTALA	-				7	110328_WaxPromix10ulA10_NH4OH80ACN.284.284.2.dta
1					1439	1	1	501.795	1001.57	2	1001.58	-0.0009	598	607	0	25.89	32	40	1.5	K	LVVSTQTALA	-				6	110328_WaxPromix10ulA10_NH4OH80ACN.1489.1489.2.dta
1					1441	1	1	501.795	1001.57	2	1001.58	-0.0009	598	607	0	45.05	27	40	0.018	K	LVVSTQTALA	-				7	110328_WaxPromix10ulA10_NH4OH80ACN.993.993.2.dta
1					1443	1	1	501.795	1001.58	2	1001.58	-0.0006	598	607	0	36.79	31	38	0.083	K	LVVSTQTALA	-				6	110328_WaxPromix10ulA10_NH4OH80ACN.1251.1251.2.dta
1					1444	1	1	501.795	1001.58	2	1001.58	-0.0005	598	607	0	32.39	30	38	0.23	K	LVVSTQTALA	-				7	110328_WaxPromix10ulA10_NH4OH80ACN.1966.1966.2.dta
1					1445	1	1	501.795	1001.58	2	1001.58	-0.0005	598	607	0	25.68	23	38	1.1	K	LVVSTQTALA	-				4	110328_WaxPromix10ulA10_NH4OH80ACN.2078.2078.2.dta
1					1446	1	1	501.795	1001.58	2	1001.58	-0.0004	598	607	0	36.01	29	39	0.11	K	LVVSTQTALA	-				6	110328_WaxPromix10ulA10_NH4OH80ACN.1128.1128.2.dta
1					1447	1	1	501.795	1001.58	2	1001.58	-0.0003	598	607	0	35.57	27	39	0.12	K	LVVSTQTALA	-				5	110328_WaxPromix10ulA10_NH4OH80ACN.1037.1037.2.dta
1					1449	1	1	501.795	1001.58	2	1001.58	-0.0002	598	607	0	34.88	26	39	0.14	K	LVVSTQTALA	-				10	110328_WaxPromix10ulA10_NH4OH80ACN.1087.1087.2.dta
1					1495	1	1	507.811	1013.61	2	1013.61	-0.0046	549	557	0	62.08		37	0.00016	K	QTALVELLK	H				7	110328_WaxPromix10ulA10_NH4OH80ACN.1210.1210.2.dta
1					1496	1	1	507.811	1013.61	2	1013.61	-0.0042	549	557	0	64.74		37	8.5e-05	K	QTALVELLK	H				7	110328_WaxPromix10ulA10_NH4OH80ACN.1155.1155.2.dta
1					1497	1	1	507.812	1013.61	2	1013.61	-0.0036	549	557	0	57.48		36	0.00043	K	QTALVELLK	H				7	110328_WaxPromix10ulA10_NH4OH80ACN.1111.1111.2.dta
1					1498	1	1	507.812	1013.61	2	1013.61	-0.0034	549	557	0	59.18		36	0.00029	K	QTALVELLK	H				7	110328_WaxPromix10ulA10_NH4OH80ACN.1265.1265.2.dta
1					1500	1	1	507.812	1013.61	2	1013.61	-0.0021	549	557	0	53.92		37	0.0012	K	QTALVELLK	H				7	110328_WaxPromix10ulA10_NH4OH80ACN.1321.1321.2.dta
1					1501	1	1	507.812	1013.61	2	1013.61	-0.0018	549	557	0	48.61	34	37	0.004	K	QTALVELLK	H				7	110328_WaxPromix10ulA10_NH4OH80ACN.1376.1376.2.dta
1					1502	1	1	507.812	1013.61	2	1013.61	-0.0017	549	557	0	44.66		37	0.0099	K	QTALVELLK	H				7	110328_WaxPromix10ulA10_NH4OH80ACN.1431.1431.2.dta
1					1503	1	1	507.812	1013.61	2	1013.61	-0.0017	549	557	0	31.18		37	0.22	K	QTALVELLK	H				4	110328_WaxPromix10ulA10_NH4OH80ACN.1540.1540.2.dta
1					1504	1	1	507.813	1013.61	2	1013.61	-0.0014	549	557	0	32.5		37	0.16	K	QTALVELLK	H				6	110328_WaxPromix10ulA10_NH4OH80ACN.1067.1067.2.dta
1					1506	1	1	507.813	1013.61	2	1013.61	-0.0012	549	557	0	45.7		37	0.0076	K	QTALVELLK	H				6	110328_WaxPromix10ulA10_NH4OH80ACN.1484.1484.2.dta
1					1509	1	1	1014.62	1013.61	1	1013.61	0.0007	549	557	0	24.04	32	37	1	K	QTALVELLK	H				10	110328_WaxPromix10ulA10_NH4OH80ACN.1279.1279.1.dta
1					1510	1	1	1014.62	1013.61	1	1013.61	0.0007	549	557	0	22.06	29	37	1.6	K	QTALVELLK	H				5	110328_WaxPromix10ulA10_NH4OH80ACN.1211.1211.1.dta
1					1511	1	1	1014.62	1013.61	1	1013.61	0.0019	549	557	0	23.73	27	37	1.1	K	QTALVELLK	H				11	110328_WaxPromix10ulA10_NH4OH80ACN.1156.1156.1.dta
1					1512	1	1	1014.62	1013.61	1	1013.61	0.0026	549	557	0	24.9	31	36	0.73	K	QTALVELLK	H				10	110328_WaxPromix10ulA10_NH4OH80ACN.1112.1112.1.dta
1					1597	1	1	517.739	1033.46	2	1033.47	-0.0018	123	130	0	29.48		39	0.49	R	NECFLSHK	D				6	110328_WaxPromix10ulA10_NH4OH80ACN.1816.1816.2.dta
1					1600	2	1	517.74	1033.47	2	1033.47	0.0002	123	130	0	21.86	31	39	3.1	R	NECFLSHK	D				6	110328_WaxPromix10ulA10_NH4OH80ACN.1996.1996.2.dta
1					1601	1	1	517.74	1033.47	2	1033.47	0.0006	123	130	0	36.56	36	39	0.1	R	NECFLSHK	D				6	110328_WaxPromix10ulA10_NH4OH80ACN.1762.1762.2.dta
1					1680	1	1	534.723	1067.43	2	1067.43	-0.0018	413	420	0	24.8	27	37	0.95	K	QNCDQFEK	L				5	110328_WaxPromix10ulA10_NH4OH80ACN.3251.3251.2.dta
1					1681	1	1	534.724	1067.43	2	1067.43	-0.0014	413	420	0	26.96	29	37	0.59	K	QNCDQFEK	L				4	110328_WaxPromix10ulA10_NH4OH80ACN.3206.3206.2.dta
1					1685	1	1	534.724	1067.43	2	1067.43	-0.0001	413	420	0	24.01	29	37	1	K	QNCDQFEK	L				4	110328_WaxPromix10ulA10_NH4OH80ACN.3167.3167.2.dta
1					1686	1	1	534.724	1067.43	2	1067.43	-0.0001	413	420	0	25.2	30	37	0.79	K	QNCDQFEK	L				4	110328_WaxPromix10ulA10_NH4OH80ACN.3296.3296.2.dta
1					1687	1	1	534.725	1067.43	2	1067.43	0.0003	413	420	0	20.4	25	37	2.8	K	QNCDQFEK	L				4	110328_WaxPromix10ulA10_NH4OH80ACN.3574.3574.2.dta
1					1689	1	1	1068.44	1067.44	1	1067.43	0.001	413	420	0	22.12	28	38	2.1	K	QNCDQFEK	L				8	110328_WaxPromix10ulA10_NH4OH80ACN.3243.3243.1.dta
1					1695	1	1	535.216	1068.42	2	1068.42	-0.0013	413	420	0	23.42	26	37	1.1	K	QNCDQFEK	L		Deamidated (NQ)	0.04000000.0	6	110328_WaxPromix10ulA10_NH4OH80ACN.5535.5535.2.dta
1					1696	1	1	535.216	1068.42	2	1068.42	-0.0006	413	420	0	24.4	28	37	0.92	K	QNCDQFEK	L		Deamidated (NQ)	0.04000000.0	6	110328_WaxPromix10ulA10_NH4OH80ACN.5635.5635.2.dta
1					1704	1	1	358.174	1071.5	3	1071.5	-0.0017	310	318	0	25.84	36	40	1.4	K	SHCIAEVEK	D				10	110328_WaxPromix10ulA10_NH4OH80ACN.2479.2479.3.dta
1					1705	1	1	358.174	1071.5	3	1071.5	-0.0017	310	318	0	26.76	38	40	1.1	K	SHCIAEVEK	D				5	110328_WaxPromix10ulA10_NH4OH80ACN.2423.2423.3.dta
1					1706	1	1	536.758	1071.5	2	1071.5	-0.0014	310	318	0	33.53	28	40	0.26	K	SHCIAEVEK	D				11	110328_WaxPromix10ulA10_NH4OH80ACN.2569.2569.2.dta
1					1707	1	1	358.174	1071.5	3	1071.5	-0.0012	310	318	0	33.42	37	40	0.27	K	SHCIAEVEK	D				8	110328_WaxPromix10ulA10_NH4OH80ACN.2371.2371.3.dta
1					1708	1	1	536.758	1071.5	2	1071.5	-0.001	310	318	0	36.61	25	40	0.13	K	SHCIAEVEK	D				9	110328_WaxPromix10ulA10_NH4OH80ACN.2386.2386.2.dta
1					1709	1	1	358.174	1071.5	3	1071.5	-0.0009	310	318	0	32.3		40	0.34	K	SHCIAEVEK	D				6	110328_WaxPromix10ulA10_NH4OH80ACN.2534.2534.3.dta
1					1710	1	1	536.758	1071.5	2	1071.5	-0.0009	310	318	0	31.34	25	40	0.42	K	SHCIAEVEK	D				9	110328_WaxPromix10ulA10_NH4OH80ACN.2490.2490.2.dta
1					1711	1	1	358.175	1071.5	3	1071.5	0.0002	310	318	0	31.3	35	40	0.43	K	SHCIAEVEK	D				5	110328_WaxPromix10ulA10_NH4OH80ACN.2662.2662.3.dta
1					1712	1	1	358.175	1071.5	3	1071.5	0.0002	310	318	0	27.14	38	40	1.1	K	SHCIAEVEK	D				5	110328_WaxPromix10ulA10_NH4OH80ACN.2592.2592.3.dta
1					1761	1	1	554.259	1106.5	2	1106.51	-0.0033	588	597	0	59.85	36	40	0.00056	K	EACFAVEGPK	L				7	110328_WaxPromix10ulA10_NH4OH80ACN.2434.2434.2.dta
1					1762	1	1	554.26	1106.5	2	1106.51	-0.0021	588	597	0	48.87		40	0.0073	K	EACFAVEGPK	L				7	110328_WaxPromix10ulA10_NH4OH80ACN.2488.2488.2.dta
1					1763	1	1	554.261	1106.51	2	1106.51	0.0001	588	597	0	36.1	32	40	0.15	K	EACFAVEGPK	L				7	110328_WaxPromix10ulA10_NH4OH80ACN.2381.2381.2.dta
1					1764	1	1	1107.52	1106.51	1	1106.51	0.0015	588	597	0	45.34	34	40	0.017	K	EACFAVEGPK	L				9	110328_WaxPromix10ulA10_NH4OH80ACN.2410.2410.1.dta
1					1765	1	1	1107.52	1106.51	1	1106.51	0.002	588	597	0	44.8	33	40	0.018	K	EACFAVEGPK	L				6	110328_WaxPromix10ulA10_NH4OH80ACN.2448.2448.1.dta
1					1766	1	1	1107.52	1106.51	1	1106.51	0.0041	588	597	0	49.33	33	40	0.006	K	EACFAVEGPK	L				9	110328_WaxPromix10ulA10_NH4OH80ACN.2505.2505.1.dta
1					1856	1	1	569.75	1137.49	2	1137.49	-0.0043	499	507	0	49.1	30	39	0.0052	K	CCTESLVNR	R				8	110328_WaxPromix10ulA10_NH4OH80ACN.2213.2213.2.dta
1					1857	1	1	569.752	1137.49	2	1137.49	-0.0007	499	507	0	45.81	33	39	0.012	K	CCTESLVNR	R				6	110328_WaxPromix10ulA10_NH4OH80ACN.2385.2385.2.dta
1					1858	1	1	569.753	1137.49	2	1137.49	-0.0003	499	507	0	43.88	30	39	0.019	K	CCTESLVNR	R				8	110328_WaxPromix10ulA10_NH4OH80ACN.2274.2274.2.dta
1					1859	1	1	569.753	1137.49	2	1137.49	0.0003	499	507	0	57.29	30	39	0.00084	K	CCTESLVNR	R				8	110328_WaxPromix10ulA10_NH4OH80ACN.2328.2328.2.dta
1					1860	1	1	569.753	1137.49	2	1137.49	0.0005	499	507	0	36.12	30	39	0.11	K	CCTESLVNR	R				6	110328_WaxPromix10ulA10_NH4OH80ACN.2440.2440.2.dta
1					1861	1	1	569.753	1137.49	2	1137.49	0.0009	499	507	0	55.11	34	39	0.0014	K	CCTESLVNR	R				8	110328_WaxPromix10ulA10_NH4OH80ACN.2163.2163.2.dta
1					1862	1	1	1138.5	1137.49	1	1137.49	0.0018	499	507	0	29.48	26	39	0.52	K	CCTESLVNR	R				9	110328_WaxPromix10ulA10_NH4OH80ACN.2199.2199.1.dta
1					1870	1	1	381.575	1141.7	3	1141.71	-0.0025	548	557	1	52.05		34	0.00093	K	KQTALVELLK	H				7	110328_WaxPromix10ulA10_NH4OH80ACN.1622.1622.3.dta
1					1871	1	1	381.576	1141.71	3	1141.71	-0.0018	548	557	1	54.1		34	0.00058	K	KQTALVELLK	H				8	110328_WaxPromix10ulA10_NH4OH80ACN.2045.2045.3.dta
1					1872	1	1	571.86	1141.71	2	1141.71	-0.0017	548	557	1	36.31	30	34	0.035	K	KQTALVELLK	H				8	110328_WaxPromix10ulA10_NH4OH80ACN.1619.1619.2.dta
1					1873	1	1	381.576	1141.71	3	1141.71	-0.0017	548	557	1	62.07		34	9.2e-05	K	KQTALVELLK	H				8	110328_WaxPromix10ulA10_NH4OH80ACN.1942.1942.3.dta
1					1874	1	1	571.86	1141.71	2	1141.71	-0.0016	548	557	1	45.41	33	34	0.0043	K	KQTALVELLK	H				6	110328_WaxPromix10ulA10_NH4OH80ACN.2118.2118.2.dta
1					1875	1	1	381.576	1141.71	3	1141.71	-0.0015	548	557	1	58.15		34	0.00023	K	KQTALVELLK	H				8	110328_WaxPromix10ulA10_NH4OH80ACN.1715.1715.3.dta
1					1876	1	1	571.86	1141.71	2	1141.71	-0.0015	548	557	1	43.68	33	34	0.0063	K	KQTALVELLK	H				8	110328_WaxPromix10ulA10_NH4OH80ACN.1660.1660.2.dta
1					1877	1	1	381.576	1141.71	3	1141.71	-0.0014	548	557	1	58.16		34	0.00023	K	KQTALVELLK	H				6	110328_WaxPromix10ulA10_NH4OH80ACN.1772.1772.3.dta
1					1878	1	1	571.86	1141.71	2	1141.71	-0.0014	548	557	1	49.42		34	0.0017	K	KQTALVELLK	H				12	110328_WaxPromix10ulA10_NH4OH80ACN.2063.2063.2.dta
1					1879	1	1	381.576	1141.71	3	1141.71	-0.0014	548	557	1	57.49		34	0.00026	K	KQTALVELLK	H				6	110328_WaxPromix10ulA10_NH4OH80ACN.1828.1828.3.dta
1					1880	1	1	381.576	1141.71	3	1141.71	-0.0013	548	557	1	55.72		34	0.0004	K	KQTALVELLK	H				8	110328_WaxPromix10ulA10_NH4OH80ACN.1663.1663.3.dta
1					1881	1	1	571.86	1141.71	2	1141.71	-0.0013	548	557	1	45.81		34	0.0039	K	KQTALVELLK	H				13	110328_WaxPromix10ulA10_NH4OH80ACN.1883.1883.2.dta
1					1882	1	1	571.86	1141.71	2	1141.71	-0.0008	548	557	1	50.89	32	34	0.0012	K	KQTALVELLK	H				8	110328_WaxPromix10ulA10_NH4OH80ACN.1827.1827.2.dta
1					1883	1	1	381.576	1141.71	3	1141.71	-0.0007	548	557	1	65.6		34	4.1e-05	K	KQTALVELLK	H				7	110328_WaxPromix10ulA10_NH4OH80ACN.1885.1885.3.dta
1					1884	1	1	571.861	1141.71	2	1141.71	-0.0006	548	557	1	44.03	31	34	0.0058	K	KQTALVELLK	H				8	110328_WaxPromix10ulA10_NH4OH80ACN.1940.1940.2.dta
1					1885	1	1	571.861	1141.71	2	1141.71	-0.0003	548	557	1	61.18		35	0.00013	K	KQTALVELLK	H				8	110328_WaxPromix10ulA10_NH4OH80ACN.1770.1770.2.dta
1					1886	1	1	571.861	1141.71	2	1141.71	0	548	557	1	53.11		35	0.00083	K	KQTALVELLK	H				8	110328_WaxPromix10ulA10_NH4OH80ACN.1714.1714.2.dta
1					1887	1	1	381.576	1141.71	3	1141.71	0.0003	548	557	1	70.48		33	9.7e-06	K	KQTALVELLK	H				7	110328_WaxPromix10ulA10_NH4OH80ACN.1990.1990.3.dta
1					1888	1	1	571.861	1141.71	2	1141.71	0.0007	548	557	1	32.36	28	33	0.064	K	KQTALVELLK	H				11	110328_WaxPromix10ulA10_NH4OH80ACN.1986.1986.2.dta
1					1889	1	1	381.577	1141.71	3	1141.71	0.0007	548	557	1	54.96		33	0.00035	K	KQTALVELLK	H				8	110328_WaxPromix10ulA10_NH4OH80ACN.2099.2099.3.dta
1					1919	1	1	582.316	1162.62	2	1162.62	-0.0059	66	75	0	61.97		40	0.00037	K	LVNELTEFAK	T				13	110328_WaxPromix10ulA10_NH4OH80ACN.1747.1747.2.dta
1					1920	1	1	582.317	1162.62	2	1162.62	-0.0043	66	75	0	50.97	32	40	0.0046	K	LVNELTEFAK	T				8	110328_WaxPromix10ulA10_NH4OH80ACN.1647.1647.2.dta
1					1922	1	1	582.318	1162.62	2	1162.62	-0.0027	66	75	0	53.78	36	40	0.0024	K	LVNELTEFAK	T				16	110328_WaxPromix10ulA10_NH4OH80ACN.1859.1859.2.dta
1					1923	1	1	582.318	1162.62	2	1162.62	-0.0027	66	75	0	45.81	32	40	0.015	K	LVNELTEFAK	T				8	110328_WaxPromix10ulA10_NH4OH80ACN.2263.2263.2.dta
1					1924	1	1	582.318	1162.62	2	1162.62	-0.0025	66	75	0	51.49	38	40	0.0042	K	LVNELTEFAK	T				16	110328_WaxPromix10ulA10_NH4OH80ACN.1804.1804.2.dta
1					1925	1	1	582.318	1162.62	2	1162.62	-0.0023	66	75	0	59.23	37	40	0.00069	K	LVNELTEFAK	T				16	110328_WaxPromix10ulA10_NH4OH80ACN.1914.1914.2.dta
1					1926	1	1	582.318	1162.62	2	1162.62	-0.001	66	75	0	51.32	36	40	0.0044	K	LVNELTEFAK	T				8	110328_WaxPromix10ulA10_NH4OH80ACN.2086.2086.2.dta
1					1927	1	1	582.318	1162.62	2	1162.62	-0.0009	66	75	0	55.85		40	0.0015	K	LVNELTEFAK	T				6	110328_WaxPromix10ulA10_NH4OH80ACN.1972.1972.2.dta
1					1928	1	1	582.319	1162.62	2	1162.62	-0.0001	66	75	0	48.01	36	41	0.011	K	LVNELTEFAK	T				8	110328_WaxPromix10ulA10_NH4OH80ACN.2038.2038.2.dta
1					1929	1	1	1163.63	1162.62	1	1162.62	0.001	66	75	0	21.72	21	40	3.9	K	LVNELTEFAK	T				5	110328_WaxPromix10ulA10_NH4OH80ACN.1656.1656.1.dta
1					1930	1	1	582.319	1162.62	2	1162.62	0.0012	66	75	0	55.34	30	40	0.0017	K	LVNELTEFAK	T				6	110328_WaxPromix10ulA10_NH4OH80ACN.2144.2144.2.dta
1					1931	1	1	582.32	1162.62	2	1162.62	0.0013	66	75	0	45.66	30	40	0.016	K	LVNELTEFAK	T				12	110328_WaxPromix10ulA10_NH4OH80ACN.2208.2208.2.dta
1					1932	1	1	1163.63	1162.63	1	1162.62	0.0036	66	75	0	29.71	25	40	0.56	K	LVNELTEFAK	T				6	110328_WaxPromix10ulA10_NH4OH80ACN.1693.1693.1.dta
1					1933	1	1	1163.64	1162.63	1	1162.62	0.0054	66	75	0	27.61	21	40	1	K	LVNELTEFAK	T				12	110328_WaxPromix10ulA10_NH4OH80ACN.1748.1748.1.dta
1					1934	1	1	582.811	1163.61	2	1163.61	-0.001	66	75	0	34.38	28	41	0.24	K	LVNELTEFAK	T		Deamidated (NQ)	0.0040000000.0	10	110328_WaxPromix10ulA10_NH4OH80ACN.2767.2767.2.dta
1					1935	1	1	582.811	1163.61	2	1163.61	-0.0004	66	75	0	33.27	28	41	0.34	K	LVNELTEFAK	T		Deamidated (NQ)	0.0040000000.0	14	110328_WaxPromix10ulA10_NH4OH80ACN.2821.2821.2.dta
1					1936	1	1	582.812	1163.61	2	1163.61	0.001	66	75	0	45.47	29	41	0.019	K	LVNELTEFAK	T		Deamidated (NQ)	0.0040000000.0	8	110328_WaxPromix10ulA10_NH4OH80ACN.2441.2441.2.dta
1					1942	1	1	389.502	1165.48	3	1165.49	-0.0014	460	468	0	29.37	30	39	0.51	R	CCTKPESER	M				5	110328_WaxPromix10ulA10_NH4OH80ACN.2709.2709.3.dta
1					1943	1	1	389.502	1165.48	3	1165.49	-0.0012	460	468	0	25.97	29	39	1.1	R	CCTKPESER	M				11	110328_WaxPromix10ulA10_NH4OH80ACN.2654.2654.3.dta
1					1944	1	1	583.75	1165.48	2	1165.49	-0.0005	460	468	0	30.56	24	39	0.39	R	CCTKPESER	M				7	110328_WaxPromix10ulA10_NH4OH80ACN.2711.2711.2.dta
1					1945	1	1	583.751	1165.49	2	1165.49	0.0011	460	468	0	26.37	21	39	0.98	R	CCTKPESER	M				7	110328_WaxPromix10ulA10_NH4OH80ACN.2658.2658.2.dta
1					2097	1	1	417.211	1248.61	3	1248.61	-0.0023	35	44	1	54.53		41	0.0024	R	FKDLGEEHFK	G				8	110328_WaxPromix10ulA10_NH4OH80ACN.2171.2171.3.dta
1					2098	1	1	417.211	1248.61	3	1248.61	-0.0018	35	44	1	52.22		41	0.0044	R	FKDLGEEHFK	G				11	110328_WaxPromix10ulA10_NH4OH80ACN.2226.2226.3.dta
1					2099	1	1	417.212	1248.61	3	1248.61	-0.0008	35	44	1	52.01	37	41	0.0044	R	FKDLGEEHFK	G				8	110328_WaxPromix10ulA10_NH4OH80ACN.2297.2297.3.dta
1					2125	1	1	428.574	1282.7	3	1282.7	-0.0026	361	371	0	38.82	36	38	0.044	R	HPEYAVSVLLR	L				10	110328_WaxPromix10ulA10_NH4OH80ACN.1615.1615.3.dta
1					2126	1	1	428.574	1282.7	3	1282.7	-0.0026	361	371	0	47.63	35	38	0.0058	R	HPEYAVSVLLR	L				13	110328_WaxPromix10ulA10_NH4OH80ACN.1345.1345.3.dta
1					2127	1	1	428.574	1282.7	3	1282.7	-0.0023	361	371	0	44.85		38	0.011	R	HPEYAVSVLLR	L				10	110328_WaxPromix10ulA10_NH4OH80ACN.1400.1400.3.dta
1					2128	1	1	428.574	1282.7	3	1282.7	-0.0022	361	371	0	35.91	37	38	0.09	R	HPEYAVSVLLR	L				6	110328_WaxPromix10ulA10_NH4OH80ACN.1561.1561.3.dta
1					2129	1	1	642.358	1282.7	2	1282.7	-0.0021	361	371	0	53.08	35	38	0.0017	R	HPEYAVSVLLR	L				9	110328_WaxPromix10ulA10_NH4OH80ACN.1478.1478.2.dta
1					2130	1	1	428.574	1282.7	3	1282.7	-0.002	361	371	0	41.99	37	38	0.022	R	HPEYAVSVLLR	L				7	110328_WaxPromix10ulA10_NH4OH80ACN.1291.1291.3.dta
1					2131	1	1	428.574	1282.7	3	1282.7	-0.002	361	371	0	38.16	33	38	0.053	R	HPEYAVSVLLR	L				7	110328_WaxPromix10ulA10_NH4OH80ACN.1884.1884.3.dta
1					2132	1	1	642.358	1282.7	2	1282.7	-0.0018	361	371	0	51.03	35	38	0.0028	R	HPEYAVSVLLR	L				9	110328_WaxPromix10ulA10_NH4OH80ACN.1311.1311.2.dta
1					2133	1	1	642.358	1282.7	2	1282.7	-0.0018	361	371	0	21.07	32	38	2.7	R	HPEYAVSVLLR	L				4	110328_WaxPromix10ulA10_NH4OH80ACN.1912.1912.2.dta
1					2134	1	1	428.575	1282.7	3	1282.7	-0.0018	361	371	0	35.49	33	38	0.099	R	HPEYAVSVLLR	L				9	110328_WaxPromix10ulA10_NH4OH80ACN.1835.1835.3.dta
1					2135	1	1	642.358	1282.7	2	1282.7	-0.0017	361	371	0	53.48		38	0.0016	R	HPEYAVSVLLR	L				9	110328_WaxPromix10ulA10_NH4OH80ACN.1532.1532.2.dta
1					2136	1	1	642.358	1282.7	2	1282.7	-0.0017	361	371	0	42.08	34	38	0.021	R	HPEYAVSVLLR	L				14	110328_WaxPromix10ulA10_NH4OH80ACN.1424.1424.2.dta
1					2137	1	1	428.575	1282.7	3	1282.7	-0.0017	361	371	0	39.7	37	38	0.037	R	HPEYAVSVLLR	L				8	110328_WaxPromix10ulA10_NH4OH80ACN.1505.1505.3.dta
1					2138	1	1	428.575	1282.7	3	1282.7	-0.0016	361	371	0	34.42		38	0.13	R	HPEYAVSVLLR	L				6	110328_WaxPromix10ulA10_NH4OH80ACN.1774.1774.3.dta
1					2139	1	1	428.575	1282.7	3	1282.7	-0.0016	361	371	0	21.27	28	38	2.6	R	HPEYAVSVLLR	L				8	110328_WaxPromix10ulA10_NH4OH80ACN.1941.1941.3.dta
1					2140	1	1	642.358	1282.7	2	1282.7	-0.0015	361	371	0	62.33	35	38	0.00021	R	HPEYAVSVLLR	L				9	110328_WaxPromix10ulA10_NH4OH80ACN.1366.1366.2.dta
1					2141	1	1	428.575	1282.7	3	1282.7	-0.0013	361	371	0	35.83		38	0.09	R	HPEYAVSVLLR	L				9	110328_WaxPromix10ulA10_NH4OH80ACN.1664.1664.3.dta
1					2142	1	1	428.575	1282.7	3	1282.7	-0.0013	361	371	0	41.3	37	38	0.025	R	HPEYAVSVLLR	L				6	110328_WaxPromix10ulA10_NH4OH80ACN.1233.1233.3.dta
1					2143	1	1	428.575	1282.7	3	1282.7	-0.0012	361	371	0	42.79	37	38	0.018	R	HPEYAVSVLLR	L				12	110328_WaxPromix10ulA10_NH4OH80ACN.1454.1454.3.dta
1					2144	1	1	428.575	1282.7	3	1282.7	-0.0011	361	371	0	36.09		38	0.084	R	HPEYAVSVLLR	L				10	110328_WaxPromix10ulA10_NH4OH80ACN.1131.1131.3.dta
1					2145	1	1	428.575	1282.7	3	1282.7	-0.0011	361	371	0	38.92		38	0.044	R	HPEYAVSVLLR	L				7	110328_WaxPromix10ulA10_NH4OH80ACN.1180.1180.3.dta
1					2146	1	1	428.575	1282.7	3	1282.7	-0.0009	361	371	0	33.72	31	38	0.15	R	HPEYAVSVLLR	L				7	110328_WaxPromix10ulA10_NH4OH80ACN.2090.2090.3.dta
1					2147	1	1	428.575	1282.7	3	1282.7	-0.0008	361	371	0	28.03		38	0.56	R	HPEYAVSVLLR	L				10	110328_WaxPromix10ulA10_NH4OH80ACN.1720.1720.3.dta
1					2148	2	1	642.359	1282.7	2	1282.7	-0.0006	361	371	0	28.28	27	38	0.48	R	HPEYAVSVLLR	L				6	110328_WaxPromix10ulA10_NH4OH80ACN.1639.1639.2.dta
1					2150	1	1	642.359	1282.7	2	1282.7	-0.0003	361	371	0	46.75	36	38	0.0067	R	HPEYAVSVLLR	L				9	110328_WaxPromix10ulA10_NH4OH80ACN.1255.1255.2.dta
1					2151	1	1	642.359	1282.7	2	1282.7	0.0001	361	371	0	31.17	35	37	0.24	R	HPEYAVSVLLR	L				9	110328_WaxPromix10ulA10_NH4OH80ACN.1690.1690.2.dta
1					2152	1	1	642.359	1282.7	2	1282.7	0.0003	361	371	0	45.43		37	0.009	R	HPEYAVSVLLR	L				8	110328_WaxPromix10ulA10_NH4OH80ACN.1587.1587.2.dta
1					2153	1	1	642.359	1282.7	2	1282.7	0.0003	361	371	0	31.89		37	0.2	R	HPEYAVSVLLR	L				5	110328_WaxPromix10ulA10_NH4OH80ACN.1745.1745.2.dta
1					2154	1	1	642.359	1282.7	2	1282.7	0.0004	361	371	0	49.18		37	0.0038	R	HPEYAVSVLLR	L				9	110328_WaxPromix10ulA10_NH4OH80ACN.1199.1199.2.dta
1					2155	1	1	428.575	1282.7	3	1282.7	0.0005	361	371	0	26.26	34	37	0.74	R	HPEYAVSVLLR	L				11	110328_WaxPromix10ulA10_NH4OH80ACN.2044.2044.3.dta
1					2157	1	1	642.36	1282.71	2	1282.7	0.0024	361	371	0	35.23	34	38	0.1	R	HPEYAVSVLLR	L				8	110328_WaxPromix10ulA10_NH4OH80ACN.1148.1148.2.dta
1					2168	1	1	646.304	1290.59	2	1290.59	-0.0014	300	309	0	42.44	38	42	0.048	K	ECCDKPLLEK	S				7	110328_WaxPromix10ulA10_NH4OH80ACN.2841.2841.2.dta
1					2170	1	1	431.205	1290.59	3	1290.59	-0.0011	300	309	0	21.37	30	42	6	K	ECCDKPLLEK	S				12	110328_WaxPromix10ulA10_NH4OH80ACN.2886.2886.3.dta
1					2172	1	1	431.205	1290.59	3	1290.59	-0.0004	300	309	0	24.08	36	41	3.1	K	ECCDKPLLEK	S				11	110328_WaxPromix10ulA10_NH4OH80ACN.2935.2935.3.dta
1					2173	1	1	646.305	1290.6	2	1290.59	0.0002	300	309	0	20.68	29	41	6.3	K	ECCDKPLLEK	S				5	110328_WaxPromix10ulA10_NH4OH80ACN.2790.2790.2.dta
1					2174	1	1	431.206	1290.6	3	1290.59	0.0013	300	309	0	20.66	32	42	7.1	K	ECCDKPLLEK	S				10	110328_WaxPromix10ulA10_NH4OH80ACN.2992.2992.3.dta
1					2195	1	1	653.359	1304.7	2	1304.71	-0.0063	402	412	0	46.46	26	40	0.014	K	HLVDEPQNLIK	Q				14	110328_WaxPromix10ulA10_NH4OH80ACN.2026.2026.2.dta
1					2196	1	1	653.359	1304.7	2	1304.71	-0.0051	402	412	0	56.66	24	40	0.0013	K	HLVDEPQNLIK	Q				9	110328_WaxPromix10ulA10_NH4OH80ACN.1936.1936.2.dta
1					2197	1	1	653.359	1304.7	2	1304.71	-0.0048	402	412	0	26.11	24	41	1.5	K	HLVDEPQNLIK	Q				15	110328_WaxPromix10ulA10_NH4OH80ACN.6851.6851.2.dta
1					2198	1	1	435.909	1304.7	3	1304.71	-0.0044	402	412	0	41.35		40	0.043	K	HLVDEPQNLIK	Q				12	110328_WaxPromix10ulA10_NH4OH80ACN.2027.2027.3.dta
1					2199	1	1	435.909	1304.7	3	1304.71	-0.004	402	412	0	41.38		40	0.045	K	HLVDEPQNLIK	Q				12	110328_WaxPromix10ulA10_NH4OH80ACN.1971.1971.3.dta
1					2200	1	1	653.36	1304.71	2	1304.71	-0.0025	402	412	0	33.76	29	41	0.27	K	HLVDEPQNLIK	Q				8	110328_WaxPromix10ulA10_NH4OH80ACN.6681.6681.2.dta
1					2203	5	1	435.909	1304.71	3	1304.71	-0.0022	402	412	0	21.41	35	40	4.3	K	HLVDEPQNLIK	Q				11	110328_WaxPromix10ulA10_NH4OH80ACN.2253.2253.3.dta
1					2204	1	1	435.909	1304.71	3	1304.71	-0.0021	402	412	0	33.85		40	0.24	K	HLVDEPQNLIK	Q				8	110328_WaxPromix10ulA10_NH4OH80ACN.1926.1926.3.dta
1					2205	1	1	653.361	1304.71	2	1304.71	-0.0018	402	412	0	22.17	22	40	3.6	K	HLVDEPQNLIK	Q				10	110328_WaxPromix10ulA10_NH4OH80ACN.3676.3676.2.dta
1					2206	2	1	435.91	1304.71	3	1304.71	-0.0017	402	412	0	30.5		40	0.53	K	HLVDEPQNLIK	Q				12	110328_WaxPromix10ulA10_NH4OH80ACN.2083.2083.3.dta
1					2208	1	1	653.361	1304.71	2	1304.71	-0.0015	402	412	0	40.21	22	40	0.057	K	HLVDEPQNLIK	Q				13	110328_WaxPromix10ulA10_NH4OH80ACN.2250.2250.2.dta
1					2209	1	1	653.361	1304.71	2	1304.71	-0.0015	402	412	0	32.61	21	40	0.33	K	HLVDEPQNLIK	Q				7	110328_WaxPromix10ulA10_NH4OH80ACN.4219.4219.2.dta
1					2210	1	1	653.361	1304.71	2	1304.71	-0.0014	402	412	0	29.49	28	40	0.67	K	HLVDEPQNLIK	Q				9	110328_WaxPromix10ulA10_NH4OH80ACN.1886.1886.2.dta
1					2211	3	1	435.91	1304.71	3	1304.71	-0.0014	402	412	0	27.48		40	1.1	K	HLVDEPQNLIK	Q				12	110328_WaxPromix10ulA10_NH4OH80ACN.2198.2198.3.dta
1					2212	1	1	653.361	1304.71	2	1304.71	-0.0013	402	412	0	25.16	19	40	1.8	K	HLVDEPQNLIK	Q				12	110328_WaxPromix10ulA10_NH4OH80ACN.5673.5673.2.dta
1					2213	1	1	653.361	1304.71	2	1304.71	-0.0012	402	412	0	32.82	20	40	0.31	K	HLVDEPQNLIK	Q				12	110328_WaxPromix10ulA10_NH4OH80ACN.3815.3815.2.dta
1					2214	1	1	653.361	1304.71	2	1304.71	-0.001	402	412	0	31.71	21	40	0.42	K	HLVDEPQNLIK	Q				12	110328_WaxPromix10ulA10_NH4OH80ACN.4994.4994.2.dta
1					2215	1	1	653.361	1304.71	2	1304.71	-0.0009	402	412	0	30.46	22	40	0.56	K	HLVDEPQNLIK	Q				8	110328_WaxPromix10ulA10_NH4OH80ACN.4797.4797.2.dta
1					2216	1	1	435.91	1304.71	3	1304.71	-0.0008	402	412	0	30.88	38	40	0.51	K	HLVDEPQNLIK	Q				10	110328_WaxPromix10ulA10_NH4OH80ACN.2140.2140.3.dta
1					2217	1	1	653.361	1304.71	2	1304.71	-0.0008	402	412	0	22.97	23	40	3.1	K	HLVDEPQNLIK	Q				4	110328_WaxPromix10ulA10_NH4OH80ACN.5920.5920.2.dta
1					2218	1	1	653.361	1304.71	2	1304.71	-0.0008	402	412	0	50.08	26	40	0.0061	K	HLVDEPQNLIK	Q				6	110328_WaxPromix10ulA10_NH4OH80ACN.2194.2194.2.dta
1					2219	1	1	653.361	1304.71	2	1304.71	-0.0007	402	412	0	28.37	20	40	0.91	K	HLVDEPQNLIK	Q				10	110328_WaxPromix10ulA10_NH4OH80ACN.3417.3417.2.dta
1					2220	1	1	653.361	1304.71	2	1304.71	-0.0006	402	412	0	29.7	34	40	0.67	K	HLVDEPQNLIK	Q				8	110328_WaxPromix10ulA10_NH4OH80ACN.4261.4261.2.dta
1					2221	1	1	653.361	1304.71	2	1304.71	-0.0006	402	412	0	33.82	21	40	0.26	K	HLVDEPQNLIK	Q				5	110328_WaxPromix10ulA10_NH4OH80ACN.4702.4702.2.dta
1					2222	1	1	653.361	1304.71	2	1304.71	-0.0006	402	412	0	37.73	22	40	0.1	K	HLVDEPQNLIK	Q				11	110328_WaxPromix10ulA10_NH4OH80ACN.2417.2417.2.dta
1					2223	1	1	653.361	1304.71	2	1304.71	-0.0005	402	412	0	44.79	26	40	0.02	K	HLVDEPQNLIK	Q				8	110328_WaxPromix10ulA10_NH4OH80ACN.2304.2304.2.dta
1					2224	3	1	435.91	1304.71	3	1304.71	-0.0005	402	412	0	20.55	34	40	5.3	K	HLVDEPQNLIK	Q				7	110328_WaxPromix10ulA10_NH4OH80ACN.2309.2309.3.dta
1					2225	1	1	653.361	1304.71	2	1304.71	-0.0004	402	412	0	22.37	14	40	3.4	K	HLVDEPQNLIK	Q				16	110328_WaxPromix10ulA10_NH4OH80ACN.4657.4657.2.dta
1					2226	1	1	653.361	1304.71	2	1304.71	-0.0004	402	412	0	30.69	17	40	0.51	K	HLVDEPQNLIK	Q				5	110328_WaxPromix10ulA10_NH4OH80ACN.3859.3859.2.dta
1					2227	1	1	653.361	1304.71	2	1304.71	-0.0004	402	412	0	34.19	19	40	0.23	K	HLVDEPQNLIK	Q				5	110328_WaxPromix10ulA10_NH4OH80ACN.4005.4005.2.dta
1					2228	1	1	653.361	1304.71	2	1304.71	-0.0004	402	412	0	34.37	21	40	0.22	K	HLVDEPQNLIK	Q				5	110328_WaxPromix10ulA10_NH4OH80ACN.4355.4355.2.dta
1					2229	1	1	653.362	1304.71	2	1304.71	-0.0002	402	412	0	31.57	32	40	0.42	K	HLVDEPQNLIK	Q				5	110328_WaxPromix10ulA10_NH4OH80ACN.4827.4827.2.dta
1					2230	1	1	653.362	1304.71	2	1304.71	-0.0002	402	412	0	38.57	26	40	0.083	K	HLVDEPQNLIK	Q				14	110328_WaxPromix10ulA10_NH4OH80ACN.2363.2363.2.dta
1					2231	1	1	653.362	1304.71	2	1304.71	0.0001	402	412	0	24.9	19	40	1.9	K	HLVDEPQNLIK	Q				7	110328_WaxPromix10ulA10_NH4OH80ACN.4494.4494.2.dta
1					2232	1	1	653.362	1304.71	2	1304.71	0.0002	402	412	0	24.1	19	40	2.3	K	HLVDEPQNLIK	Q				10	110328_WaxPromix10ulA10_NH4OH80ACN.4882.4882.2.dta
1					2233	1	1	653.362	1304.71	2	1304.71	0.0002	402	412	0	27.35	23	40	1.1	K	HLVDEPQNLIK	Q				14	110328_WaxPromix10ulA10_NH4OH80ACN.4893.4893.2.dta
1					2234	1	1	653.362	1304.71	2	1304.71	0.0002	402	412	0	31.24	22	40	0.44	K	HLVDEPQNLIK	Q				5	110328_WaxPromix10ulA10_NH4OH80ACN.3248.3248.2.dta
1					2235	1	1	653.362	1304.71	2	1304.71	0.0002	402	412	0	31.22	22	40	0.44	K	HLVDEPQNLIK	Q				5	110328_WaxPromix10ulA10_NH4OH80ACN.4121.4121.2.dta
1					2236	1	1	653.362	1304.71	2	1304.71	0.0003	402	412	0	34.49	23	40	0.21	K	HLVDEPQNLIK	Q				8	110328_WaxPromix10ulA10_NH4OH80ACN.4045.4045.2.dta
1					2237	1	1	653.362	1304.71	2	1304.71	0.0003	402	412	0	45.25	23	40	0.017	K	HLVDEPQNLIK	Q				8	110328_WaxPromix10ulA10_NH4OH80ACN.2137.2137.2.dta
1					2238	1	1	653.362	1304.71	2	1304.71	0.0004	402	412	0	27.36	19	40	1.1	K	HLVDEPQNLIK	Q				7	110328_WaxPromix10ulA10_NH4OH80ACN.4935.4935.2.dta
1					2239	1	1	653.362	1304.71	2	1304.71	0.0004	402	412	0	34.38	20	40	0.21	K	HLVDEPQNLIK	Q				5	110328_WaxPromix10ulA10_NH4OH80ACN.4563.4563.2.dta
1					2240	1	1	653.362	1304.71	2	1304.71	0.0005	402	412	0	21.5	21	40	4.1	K	HLVDEPQNLIK	Q				10	110328_WaxPromix10ulA10_NH4OH80ACN.5828.5828.2.dta
1					2241	1	1	653.362	1304.71	2	1304.71	0.0005	402	412	0	28.4	24	40	0.85	K	HLVDEPQNLIK	Q				12	110328_WaxPromix10ulA10_NH4OH80ACN.5895.5895.2.dta
1					2242	1	1	653.362	1304.71	2	1304.71	0.0006	402	412	0	33.96	25	40	0.24	K	HLVDEPQNLIK	Q				5	110328_WaxPromix10ulA10_NH4OH80ACN.4981.4981.2.dta
1					2243	1	1	653.362	1304.71	2	1304.71	0.0006	402	412	0	25.27	22	40	1.7	K	HLVDEPQNLIK	Q				7	110328_WaxPromix10ulA10_NH4OH80ACN.3956.3956.2.dta
1					2244	1	1	653.362	1304.71	2	1304.71	0.0007	402	412	0	21.07	16	40	4.6	K	HLVDEPQNLIK	Q				7	110328_WaxPromix10ulA10_NH4OH80ACN.3691.3691.2.dta
1					2245	1	1	653.362	1304.71	2	1304.71	0.0008	402	412	0	21.11	22	40	4.6	K	HLVDEPQNLIK	Q				8	110328_WaxPromix10ulA10_NH4OH80ACN.6023.6023.2.dta
1					2246	1	1	653.362	1304.71	2	1304.71	0.0008	402	412	0	33.77	20	40	0.25	K	HLVDEPQNLIK	Q				5	110328_WaxPromix10ulA10_NH4OH80ACN.4309.4309.2.dta
1					2247	1	1	653.362	1304.71	2	1304.71	0.001	402	412	0	37.24	21	40	0.1	K	HLVDEPQNLIK	Q				7	110328_WaxPromix10ulA10_NH4OH80ACN.4748.4748.2.dta
1					2248	1	1	653.362	1304.71	2	1304.71	0.0011	402	412	0	24.63	22	39	1.7	K	HLVDEPQNLIK	Q				12	110328_WaxPromix10ulA10_NH4OH80ACN.3909.3909.2.dta
1					2249	1	1	653.362	1304.71	2	1304.71	0.0014	402	412	0	25.3	21	39	1.5	K	HLVDEPQNLIK	Q				8	110328_WaxPromix10ulA10_NH4OH80ACN.6607.6607.2.dta
1					2250	1	1	653.362	1304.71	2	1304.71	0.0014	402	412	0	37.88	28	39	0.081	K	HLVDEPQNLIK	Q				8	110328_WaxPromix10ulA10_NH4OH80ACN.2538.2538.2.dta
1					2251	1	1	653.362	1304.71	2	1304.71	0.0014	402	412	0	22.86	18	39	2.6	K	HLVDEPQNLIK	Q				7	110328_WaxPromix10ulA10_NH4OH80ACN.4613.4613.2.dta
1					2252	1	1	653.362	1304.71	2	1304.71	0.0015	402	412	0	25.18	19	40	1.7	K	HLVDEPQNLIK	Q				7	110328_WaxPromix10ulA10_NH4OH80ACN.7191.7191.2.dta
1					2253	1	1	653.362	1304.71	2	1304.71	0.0015	402	412	0	32.47	25	40	0.31	K	HLVDEPQNLIK	Q				12	110328_WaxPromix10ulA10_NH4OH80ACN.2595.2595.2.dta
1					2254	1	1	653.362	1304.71	2	1304.71	0.0016	402	412	0	31.41	19	40	0.4	K	HLVDEPQNLIK	Q				5	110328_WaxPromix10ulA10_NH4OH80ACN.4397.4397.2.dta
1					2255	1	1	653.362	1304.71	2	1304.71	0.0016	402	412	0	20.55	20	40	4.8	K	HLVDEPQNLIK	Q				4	110328_WaxPromix10ulA10_NH4OH80ACN.3737.3737.2.dta
1					2256	1	1	653.363	1304.71	2	1304.71	0.0019	402	412	0	31.04	15	40	0.43	K	HLVDEPQNLIK	Q				5	110328_WaxPromix10ulA10_NH4OH80ACN.4097.4097.2.dta
1					2257	1	1	653.363	1304.71	2	1304.71	0.002	402	412	0	28.8	21	40	0.71	K	HLVDEPQNLIK	Q				11	110328_WaxPromix10ulA10_NH4OH80ACN.5033.5033.2.dta
1					2258	1	1	653.363	1304.71	2	1304.71	0.002	402	412	0	25.1	20	40	1.7	K	HLVDEPQNLIK	Q				7	110328_WaxPromix10ulA10_NH4OH80ACN.3629.3629.2.dta
1					2259	1	1	653.363	1304.71	2	1304.71	0.0022	402	412	0	29.12	20	40	0.66	K	HLVDEPQNLIK	Q				7	110328_WaxPromix10ulA10_NH4OH80ACN.2795.2795.2.dta
1					2261	1	1	1305.72	1304.71	1	1304.71	0.003	402	412	0	31.25	25	40	0.4	K	HLVDEPQNLIK	Q				10	110328_WaxPromix10ulA10_NH4OH80ACN.1957.1957.1.dta
1					2262	1	1	1305.72	1304.71	1	1304.71	0.0035	402	412	0	35.53	25	40	0.15	K	HLVDEPQNLIK	Q				10	110328_WaxPromix10ulA10_NH4OH80ACN.1965.1965.1.dta
1					2263	1	1	653.364	1304.71	2	1304.71	0.0036	402	412	0	21.46	19	40	3.7	K	HLVDEPQNLIK	Q				7	110328_WaxPromix10ulA10_NH4OH80ACN.5377.5377.2.dta
1					2264	1	1	653.364	1304.71	2	1304.71	0.0041	402	412	0	20.6	17	40	4.5	K	HLVDEPQNLIK	Q				4	110328_WaxPromix10ulA10_NH4OH80ACN.3769.3769.2.dta
1					2267	1	1	436.238	1305.69	3	1305.69	-0.0021	402	412	0	25.24	34	41	2	K	HLVDEPQNLIK	Q		Deamidated (NQ)	0.00000004000.0	11	110328_WaxPromix10ulA10_NH4OH80ACN.2849.2849.3.dta
1					2268	1	1	653.855	1305.69	2	1305.69	0.0017	402	412	0	37.22	29	41	0.13	K	HLVDEPQNLIK	Q		Deamidated (NQ)	0.00000040000.0	11	110328_WaxPromix10ulA10_NH4OH80ACN.2497.2497.2.dta
1					2269	1	1	653.855	1305.69	2	1305.69	0.0019	402	412	0	45.32	25	41	0.019	K	HLVDEPQNLIK	Q		Deamidated (NQ)	0.00000004000.0	6	110328_WaxPromix10ulA10_NH4OH80ACN.2861.2861.2.dta
1					2275	1	1	653.862	1305.71	2	1304.71	1.0012	402	412	0	33.41	27	40	0.27	K	HLVDEPQNLIK	Q				8	110328_WaxPromix10ulA10_NH4OH80ACN.6827.6827.2.dta
1					2276	1	1	653.862	1305.71	2	1304.71	1.0013	402	412	0	46	27	40	0.015	K	HLVDEPQNLIK	Q				9	110328_WaxPromix10ulA10_NH4OH80ACN.5709.5709.2.dta
1					2277	1	1	653.865	1305.72	2	1304.71	1.0071	402	412	0	23.45	30	39	2.1	K	HLVDEPQNLIK	Q				10	110328_WaxPromix10ulA10_NH4OH80ACN.6875.6875.2.dta
1					2469	1	1	700.347	1398.68	2	1398.69	-0.0068	569	580	0	70.98	31	42	7.3e-05	K	TVMENFVAFVDK	C				9	110328_WaxPromix10ulA10_NH4OH80ACN.2082.2082.2.dta
1					2470	1	1	700.349	1398.68	2	1398.69	-0.0027	569	580	0	70.76	35	42	7.4e-05	K	TVMENFVAFVDK	C				9	110328_WaxPromix10ulA10_NH4OH80ACN.2136.2136.2.dta
1					2471	1	1	700.349	1398.68	2	1398.69	-0.0026	569	580	0	68.13	30	42	0.00013	K	TVMENFVAFVDK	C				9	110328_WaxPromix10ulA10_NH4OH80ACN.2246.2246.2.dta
1					2472	1	1	700.349	1398.68	2	1398.69	-0.0024	569	580	0	76.35	31	42	2e-05	K	TVMENFVAFVDK	C				9	110328_WaxPromix10ulA10_NH4OH80ACN.2191.2191.2.dta
1					2473	1	1	700.349	1398.68	2	1398.69	-0.002	569	580	0	65.54	31	42	0.00024	K	TVMENFVAFVDK	C				9	110328_WaxPromix10ulA10_NH4OH80ACN.2412.2412.2.dta
1					2474	1	1	700.349	1398.68	2	1398.69	-0.0019	569	580	0	55.54	32	42	0.0024	K	TVMENFVAFVDK	C				7	110328_WaxPromix10ulA10_NH4OH80ACN.7081.7081.2.dta
1					2475	1	1	700.349	1398.68	2	1398.69	-0.0017	569	580	0	53.4	27	42	0.0041	K	TVMENFVAFVDK	C				9	110328_WaxPromix10ulA10_NH4OH80ACN.2576.2576.2.dta
1					2476	1	1	700.349	1398.68	2	1398.69	-0.0016	569	580	0	70.92	34	42	7.6e-05	K	TVMENFVAFVDK	C				9	110328_WaxPromix10ulA10_NH4OH80ACN.2028.2028.2.dta
1					2477	1	1	700.349	1398.68	2	1398.69	-0.0015	569	580	0	51.94	33	42	0.006	K	TVMENFVAFVDK	C				8	110328_WaxPromix10ulA10_NH4OH80ACN.4123.4123.2.dta
1					2478	1	1	700.35	1398.68	2	1398.69	-0.0007	569	580	0	71	33	42	7.3e-05	K	TVMENFVAFVDK	C				9	110328_WaxPromix10ulA10_NH4OH80ACN.2302.2302.2.dta
1					2479	1	1	700.35	1398.68	2	1398.69	-0.0006	569	580	0	60.73	32	42	0.00078	K	TVMENFVAFVDK	C				9	110328_WaxPromix10ulA10_NH4OH80ACN.2357.2357.2.dta
1					2480	1	1	700.35	1398.68	2	1398.69	-0.0006	569	580	0	25.16	27	42	2.8	K	TVMENFVAFVDK	C				7	110328_WaxPromix10ulA10_NH4OH80ACN.3616.3616.2.dta
1					2481	1	1	700.35	1398.68	2	1398.69	-0.0006	569	580	0	29.54	21	42	1	K	TVMENFVAFVDK	C				9	110328_WaxPromix10ulA10_NH4OH80ACN.4787.4787.2.dta
1					2482	1	1	700.35	1398.68	2	1398.69	-0.0006	569	580	0	34.5	27	42	0.33	K	TVMENFVAFVDK	C				9	110328_WaxPromix10ulA10_NH4OH80ACN.3825.3825.2.dta
1					2483	1	1	700.35	1398.68	2	1398.69	-0.0004	569	580	0	40.99	23	42	0.073	K	TVMENFVAFVDK	C				8	110328_WaxPromix10ulA10_NH4OH80ACN.7093.7093.2.dta
1					2484	1	1	700.35	1398.68	2	1398.69	-0.0004	569	580	0	68.24	32	42	0.00013	K	TVMENFVAFVDK	C				9	110328_WaxPromix10ulA10_NH4OH80ACN.2688.2688.2.dta
1					2485	1	1	700.35	1398.68	2	1398.69	-0.0003	569	580	0	70.81	31	42	7.3e-05	K	TVMENFVAFVDK	C				9	110328_WaxPromix10ulA10_NH4OH80ACN.2466.2466.2.dta
1					2486	1	1	700.35	1398.69	2	1398.69	-0.0002	569	580	0	30.19	25	42	0.82	K	TVMENFVAFVDK	C				9	110328_WaxPromix10ulA10_NH4OH80ACN.4762.4762.2.dta
1					2487	1	1	700.35	1398.69	2	1398.69	-0.0001	569	580	0	35.43	22	42	0.25	K	TVMENFVAFVDK	C				9	110328_WaxPromix10ulA10_NH4OH80ACN.3287.3287.2.dta
1					2488	1	1	700.35	1398.69	2	1398.69	-0.0001	569	580	0	68.05	32	42	0.00013	K	TVMENFVAFVDK	C				9	110328_WaxPromix10ulA10_NH4OH80ACN.2633.2633.2.dta
1					2489	1	1	700.35	1398.69	2	1398.69	0.0001	569	580	0	37.42	27	42	0.16	K	TVMENFVAFVDK	C				8	110328_WaxPromix10ulA10_NH4OH80ACN.3717.3717.2.dta
1					2490	1	1	700.35	1398.69	2	1398.69	0.0002	569	580	0	70.55	29	42	7.7e-05	K	TVMENFVAFVDK	C				9	110328_WaxPromix10ulA10_NH4OH80ACN.2801.2801.2.dta
1					2491	1	1	700.35	1398.69	2	1398.69	0.0002	569	580	0	68.36	34	42	0.00013	K	TVMENFVAFVDK	C				10	110328_WaxPromix10ulA10_NH4OH80ACN.2522.2522.2.dta
1					2492	1	1	700.35	1398.69	2	1398.69	0.0006	569	580	0	60.19	27	42	0.00083	K	TVMENFVAFVDK	C				9	110328_WaxPromix10ulA10_NH4OH80ACN.3098.3098.2.dta
1					2493	1	1	700.35	1398.69	2	1398.69	0.0006	569	580	0	36.72	27	42	0.18	K	TVMENFVAFVDK	C				6	110328_WaxPromix10ulA10_NH4OH80ACN.3954.3954.2.dta
1					2494	1	1	700.35	1398.69	2	1398.69	0.0007	569	580	0	68.21	31	42	0.00014	K	TVMENFVAFVDK	C				9	110328_WaxPromix10ulA10_NH4OH80ACN.2854.2854.2.dta
1					2495	1	1	700.35	1398.69	2	1398.69	0.0008	569	580	0	61.87	27	42	0.00059	K	TVMENFVAFVDK	C				9	110328_WaxPromix10ulA10_NH4OH80ACN.3175.3175.2.dta
1					2496	1	1	700.35	1398.69	2	1398.69	0.0008	569	580	0	67.72	29	42	0.00015	K	TVMENFVAFVDK	C				9	110328_WaxPromix10ulA10_NH4OH80ACN.3054.3054.2.dta
1					2497	1	1	700.351	1398.69	2	1398.69	0.001	569	580	0	30.95	22	42	0.73	K	TVMENFVAFVDK	C				9	110328_WaxPromix10ulA10_NH4OH80ACN.3493.3493.2.dta
1					2498	1	1	700.351	1398.69	2	1398.69	0.001	569	580	0	44.01	26	42	0.036	K	TVMENFVAFVDK	C				9	110328_WaxPromix10ulA10_NH4OH80ACN.3625.3625.2.dta
1					2499	1	1	700.351	1398.69	2	1398.69	0.0012	569	580	0	31.83	25	42	0.59	K	TVMENFVAFVDK	C				9	110328_WaxPromix10ulA10_NH4OH80ACN.4290.4290.2.dta
1					2500	1	1	700.351	1398.69	2	1398.69	0.0012	569	580	0	42.55	25	42	0.05	K	TVMENFVAFVDK	C				6	110328_WaxPromix10ulA10_NH4OH80ACN.3897.3897.2.dta
1					2501	1	1	700.351	1398.69	2	1398.69	0.0013	569	580	0	62.47	29	42	0.00051	K	TVMENFVAFVDK	C				9	110328_WaxPromix10ulA10_NH4OH80ACN.2909.2909.2.dta
1					2502	1	1	700.351	1398.69	2	1398.69	0.0013	569	580	0	43.88	31	42	0.037	K	TVMENFVAFVDK	C				9	110328_WaxPromix10ulA10_NH4OH80ACN.3907.3907.2.dta
1					2503	1	1	700.351	1398.69	2	1398.69	0.0013	569	580	0	64.86	30	42	0.00029	K	TVMENFVAFVDK	C				9	110328_WaxPromix10ulA10_NH4OH80ACN.2964.2964.2.dta
1					2504	1	1	700.351	1398.69	2	1398.69	0.0015	569	580	0	37.98	24	42	0.14	K	TVMENFVAFVDK	C				9	110328_WaxPromix10ulA10_NH4OH80ACN.3814.3814.2.dta
1					2505	1	1	700.351	1398.69	2	1398.69	0.0015	569	580	0	67.96	30	42	0.00014	K	TVMENFVAFVDK	C				9	110328_WaxPromix10ulA10_NH4OH80ACN.2744.2744.2.dta
1					2506	1	1	700.351	1398.69	2	1398.69	0.0016	569	580	0	75.66	33	42	2.3e-05	K	TVMENFVAFVDK	C				10	110328_WaxPromix10ulA10_NH4OH80ACN.3010.3010.2.dta
1					2507	1	1	700.351	1398.69	2	1398.69	0.0016	569	580	0	32.78	25	42	0.45	K	TVMENFVAFVDK	C				6	110328_WaxPromix10ulA10_NH4OH80ACN.4050.4050.2.dta
1					2508	1	1	700.351	1398.69	2	1398.69	0.0017	569	580	0	42.32	22	42	0.051	K	TVMENFVAFVDK	C				8	110328_WaxPromix10ulA10_NH4OH80ACN.3738.3738.2.dta
1					2509	1	1	700.351	1398.69	2	1398.69	0.0017	569	580	0	56.15	27	42	0.0022	K	TVMENFVAFVDK	C				9	110328_WaxPromix10ulA10_NH4OH80ACN.3220.3220.2.dta
1					2510	1	1	700.351	1398.69	2	1398.69	0.0017	569	580	0	35.59	23	42	0.25	K	TVMENFVAFVDK	C				9	110328_WaxPromix10ulA10_NH4OH80ACN.3764.3764.2.dta
1					2511	1	1	700.351	1398.69	2	1398.69	0.0018	569	580	0	64.33	30	42	0.00033	K	TVMENFVAFVDK	C				9	110328_WaxPromix10ulA10_NH4OH80ACN.3266.3266.2.dta
1					2512	1	1	700.351	1398.69	2	1398.69	0.0022	569	580	0	44.12	34	42	0.034	K	TVMENFVAFVDK	C				9	110328_WaxPromix10ulA10_NH4OH80ACN.4004.4004.2.dta
1					2513	1	1	1399.7	1398.69	1	1398.69	0.0028	569	580	0	24.25	19	42	3.4	K	TVMENFVAFVDK	C				9	110328_WaxPromix10ulA10_NH4OH80ACN.2112.2112.1.dta
1					2514	1	1	700.351	1398.69	2	1398.69	0.0028	569	580	0	36.3	25	42	0.21	K	TVMENFVAFVDK	C				9	110328_WaxPromix10ulA10_NH4OH80ACN.3675.3675.2.dta
1					2515	1	1	1399.7	1398.69	1	1398.69	0.0068	569	580	0	29.99	19	42	0.87	K	TVMENFVAFVDK	C				10	110328_WaxPromix10ulA10_NH4OH80ACN.2056.2056.1.dta
1					2520	1	1	700.842	1399.67	2	1399.67	0.0009	569	580	0	63.62	28	43	0.00044	K	TVMENFVAFVDK	C		Deamidated (NQ)	0.000040000000.0	10	110328_WaxPromix10ulA10_NH4OH80ACN.3121.3121.2.dta
1					2521	1	1	700.842	1399.67	2	1399.67	0.0012	569	580	0	50.63	29	43	0.0086	K	TVMENFVAFVDK	C		Deamidated (NQ)	0.000040000000.0	9	110328_WaxPromix10ulA10_NH4OH80ACN.3162.3162.2.dta
1					2545	1	1	708.347	1414.68	2	1414.68	-0.0017	569	580	0	51.65	27	43	0.007	K	TVMENFVAFVDK	C		Oxidation (M)	0.001000000000.0	10	110328_WaxPromix10ulA10_NH4OH80ACN.2264.2264.2.dta
1					2557	1	1	473.901	1418.68	3	1418.69	-0.006	89	100	0	36.52	38	42	0.19	K	SLHTLFGDELCK	V				12	110328_WaxPromix10ulA10_NH4OH80ACN.2103.2103.3.dta
1					2558	1	1	473.901	1418.68	3	1418.69	-0.0056	89	100	0	34.79	29	42	0.28	K	SLHTLFGDELCK	V				13	110328_WaxPromix10ulA10_NH4OH80ACN.2158.2158.3.dta
1					2559	1	1	710.348	1418.68	2	1418.69	-0.0044	89	100	0	66.1	30	42	0.00022	K	SLHTLFGDELCK	V				15	110328_WaxPromix10ulA10_NH4OH80ACN.2115.2115.2.dta
1					2560	1	1	473.901	1418.68	3	1418.69	-0.0039	89	100	0	23.36	31	42	3.9	K	SLHTLFGDELCK	V				6	110328_WaxPromix10ulA10_NH4OH80ACN.6864.6864.3.dta
1					2561	1	1	710.349	1418.68	2	1418.69	-0.0034	89	100	0	68.39	27	42	0.00012	K	SLHTLFGDELCK	V				15	110328_WaxPromix10ulA10_NH4OH80ACN.2170.2170.2.dta
1					2562	1	1	473.902	1418.68	3	1418.69	-0.0032	89	100	0	24.09	27	42	3.6	K	SLHTLFGDELCK	V				12	110328_WaxPromix10ulA10_NH4OH80ACN.7233.7233.3.dta
1					2563	1	1	473.902	1418.68	3	1418.69	-0.0031	89	100	0	46.3	35	42	0.022	K	SLHTLFGDELCK	V				8	110328_WaxPromix10ulA10_NH4OH80ACN.2216.2216.3.dta
1					2565	1	1	473.902	1418.68	3	1418.69	-0.0025	89	100	0	28.97	26	42	1.1	K	SLHTLFGDELCK	V				11	110328_WaxPromix10ulA10_NH4OH80ACN.4158.4158.3.dta
1					2566	1	1	473.902	1418.68	3	1418.69	-0.0023	89	100	0	28.38	34	42	1.3	K	SLHTLFGDELCK	V				10	110328_WaxPromix10ulA10_NH4OH80ACN.4445.4445.3.dta
1					2567	1	1	473.902	1418.68	3	1418.69	-0.0022	89	100	0	35.75	28	42	0.24	K	SLHTLFGDELCK	V				8	110328_WaxPromix10ulA10_NH4OH80ACN.4955.4955.3.dta
1					2568	1	1	473.902	1418.68	3	1418.69	-0.0022	89	100	0	25.67	27	42	2.4	K	SLHTLFGDELCK	V				7	110328_WaxPromix10ulA10_NH4OH80ACN.4681.4681.3.dta
1					2569	1	1	473.902	1418.68	3	1418.69	-0.0021	89	100	0	37.68	33	42	0.15	K	SLHTLFGDELCK	V				8	110328_WaxPromix10ulA10_NH4OH80ACN.3238.3238.3.dta
1					2570	1	1	473.902	1418.68	3	1418.69	-0.0021	89	100	0	23.03	28	42	4.5	K	SLHTLFGDELCK	V				6	110328_WaxPromix10ulA10_NH4OH80ACN.6928.6928.3.dta
1					2571	1	1	473.902	1418.68	3	1418.69	-0.002	89	100	0	35.88	31	42	0.23	K	SLHTLFGDELCK	V				12	110328_WaxPromix10ulA10_NH4OH80ACN.4104.4104.3.dta
1					2572	1	1	473.902	1418.68	3	1418.69	-0.002	89	100	0	43.31	34	42	0.042	K	SLHTLFGDELCK	V				8	110328_WaxPromix10ulA10_NH4OH80ACN.2382.2382.3.dta
1					2573	1	1	473.902	1418.68	3	1418.69	-0.002	89	100	0	35	36	42	0.29	K	SLHTLFGDELCK	V				14	110328_WaxPromix10ulA10_NH4OH80ACN.4819.4819.3.dta
1					2574	1	1	473.902	1418.68	3	1418.69	-0.002	89	100	0	32.62	27	42	0.49	K	SLHTLFGDELCK	V				7	110328_WaxPromix10ulA10_NH4OH80ACN.4909.4909.3.dta
1					2575	1	1	473.902	1418.68	3	1418.69	-0.002	89	100	0	36.95	29	42	0.18	K	SLHTLFGDELCK	V				7	110328_WaxPromix10ulA10_NH4OH80ACN.2544.2544.3.dta
1					2576	1	1	473.902	1418.68	3	1418.69	-0.0019	89	100	0	29.89	28	42	0.92	K	SLHTLFGDELCK	V				7	110328_WaxPromix10ulA10_NH4OH80ACN.3923.3923.3.dta
1					2577	1	1	473.902	1418.68	3	1418.69	-0.0019	89	100	0	37.27	29	42	0.17	K	SLHTLFGDELCK	V				12	110328_WaxPromix10ulA10_NH4OH80ACN.2270.2270.3.dta
1					2578	1	1	710.35	1418.68	2	1418.69	-0.0019	89	100	0	48.67	28	42	0.012	K	SLHTLFGDELCK	V				8	110328_WaxPromix10ulA10_NH4OH80ACN.2552.2552.2.dta
1					2579	1	1	473.902	1418.68	3	1418.69	-0.0019	89	100	0	33.95	27	42	0.36	K	SLHTLFGDELCK	V				13	110328_WaxPromix10ulA10_NH4OH80ACN.2053.2053.3.dta
1					2580	1	1	473.902	1418.68	3	1418.69	-0.0018	89	100	0	35.48	34	42	0.26	K	SLHTLFGDELCK	V				12	110328_WaxPromix10ulA10_NH4OH80ACN.5281.5281.3.dta
1					2581	1	1	473.902	1418.68	3	1418.69	-0.0017	89	100	0	33.13	29	42	0.45	K	SLHTLFGDELCK	V				8	110328_WaxPromix10ulA10_NH4OH80ACN.5000.5000.3.dta
1					2582	1	1	473.902	1418.68	3	1418.69	-0.0017	89	100	0	31.35	31	42	0.68	K	SLHTLFGDELCK	V				7	110328_WaxPromix10ulA10_NH4OH80ACN.4204.4204.3.dta
1					2583	1	1	473.902	1418.68	3	1418.69	-0.0017	89	100	0	40.91	34	42	0.074	K	SLHTLFGDELCK	V				7	110328_WaxPromix10ulA10_NH4OH80ACN.2824.2824.3.dta
1					2584	1	1	473.902	1418.68	3	1418.69	-0.0016	89	100	0	30.1	28	42	0.89	K	SLHTLFGDELCK	V				7	110328_WaxPromix10ulA10_NH4OH80ACN.6359.6359.3.dta
1					2585	1	1	473.902	1418.68	3	1418.69	-0.0015	89	100	0	20.59	29	42	7.9	K	SLHTLFGDELCK	V				7	110328_WaxPromix10ulA10_NH4OH80ACN.6565.6565.3.dta
1					2586	1	1	473.902	1418.68	3	1418.69	-0.0015	89	100	0	35.13	29	42	0.28	K	SLHTLFGDELCK	V				14	110328_WaxPromix10ulA10_NH4OH80ACN.2770.2770.3.dta
1					2587	1	1	473.902	1418.68	3	1418.69	-0.0015	89	100	0	22.64	33	42	4.9	K	SLHTLFGDELCK	V				7	110328_WaxPromix10ulA10_NH4OH80ACN.5967.5967.3.dta
1					2588	1	1	473.902	1418.68	3	1418.69	-0.0015	89	100	0	42.93	36	42	0.046	K	SLHTLFGDELCK	V				7	110328_WaxPromix10ulA10_NH4OH80ACN.4772.4772.3.dta
1					2589	1	1	473.902	1418.68	3	1418.69	-0.0015	89	100	0	35.34	33	42	0.26	K	SLHTLFGDELCK	V				13	110328_WaxPromix10ulA10_NH4OH80ACN.2324.2324.3.dta
1					2590	1	1	473.902	1418.68	3	1418.69	-0.0015	89	100	0	48.26	29	42	0.013	K	SLHTLFGDELCK	V				9	110328_WaxPromix10ulA10_NH4OH80ACN.3190.3190.3.dta
1					2591	1	1	473.902	1418.68	3	1418.69	-0.0015	89	100	0	29.61	27	42	0.99	K	SLHTLFGDELCK	V				7	110328_WaxPromix10ulA10_NH4OH80ACN.3874.3874.3.dta
1					2592	1	1	473.902	1418.68	3	1418.69	-0.0014	89	100	0	31.8	27	42	0.6	K	SLHTLFGDELCK	V				7	110328_WaxPromix10ulA10_NH4OH80ACN.5046.5046.3.dta
1					2593	1	1	473.902	1418.68	3	1418.69	-0.0014	89	100	0	36.67	28	42	0.19	K	SLHTLFGDELCK	V				11	110328_WaxPromix10ulA10_NH4OH80ACN.2600.2600.3.dta
1					2594	1	1	473.902	1418.69	3	1418.69	-0.0013	89	100	0	29.09	25	42	1.1	K	SLHTLFGDELCK	V				7	110328_WaxPromix10ulA10_NH4OH80ACN.4725.4725.3.dta
1					2595	1	1	473.902	1418.69	3	1418.69	-0.0013	89	100	0	27.18	28	42	1.7	K	SLHTLFGDELCK	V				7	110328_WaxPromix10ulA10_NH4OH80ACN.4298.4298.3.dta
1					2596	1	1	473.902	1418.69	3	1418.69	-0.0012	89	100	0	29.01	31	42	1.1	K	SLHTLFGDELCK	V				12	110328_WaxPromix10ulA10_NH4OH80ACN.3683.3683.3.dta
1					2597	1	1	473.902	1418.69	3	1418.69	-0.0011	89	100	0	27.18	29	42	1.7	K	SLHTLFGDELCK	V				9	110328_WaxPromix10ulA10_NH4OH80ACN.5687.5687.3.dta
1					2598	1	1	473.902	1418.69	3	1418.69	-0.0011	89	100	0	45.63	31	42	0.025	K	SLHTLFGDELCK	V				8	110328_WaxPromix10ulA10_NH4OH80ACN.3049.3049.3.dta
1					2599	1	1	473.902	1418.69	3	1418.69	-0.0011	89	100	0	29.69	29	42	0.97	K	SLHTLFGDELCK	V				7	110328_WaxPromix10ulA10_NH4OH80ACN.5236.5236.3.dta
1					2600	1	1	473.902	1418.69	3	1418.69	-0.0011	89	100	0	26.25	32	42	2.1	K	SLHTLFGDELCK	V				7	110328_WaxPromix10ulA10_NH4OH80ACN.5922.5922.3.dta
1					2601	1	1	473.902	1418.69	3	1418.69	-0.001	89	100	0	30.98	29	42	0.71	K	SLHTLFGDELCK	V				8	110328_WaxPromix10ulA10_NH4OH80ACN.5868.5868.3.dta
1					2602	1	1	473.902	1418.69	3	1418.69	-0.001	89	100	0	33.46	33	42	0.4	K	SLHTLFGDELCK	V				8	110328_WaxPromix10ulA10_NH4OH80ACN.3824.3824.3.dta
1					2603	1	1	473.902	1418.69	3	1418.69	-0.0009	89	100	0	35.25	32	42	0.27	K	SLHTLFGDELCK	V				14	110328_WaxPromix10ulA10_NH4OH80ACN.2714.2714.3.dta
1					2604	1	1	473.902	1418.69	3	1418.69	-0.0009	89	100	0	32.9	23	42	0.46	K	SLHTLFGDELCK	V				8	110328_WaxPromix10ulA10_NH4OH80ACN.6480.6480.3.dta
1					2605	1	1	473.902	1418.69	3	1418.69	-0.0008	89	100	0	36.47	36	42	0.21	K	SLHTLFGDELCK	V				7	110328_WaxPromix10ulA10_NH4OH80ACN.3967.3967.3.dta
1					2606	1	1	473.902	1418.69	3	1418.69	-0.0008	89	100	0	34.14	28	42	0.35	K	SLHTLFGDELCK	V				7	110328_WaxPromix10ulA10_NH4OH80ACN.7058.7058.3.dta
1					2607	1	1	473.902	1418.69	3	1418.69	-0.0008	89	100	0	29.74	34	42	0.97	K	SLHTLFGDELCK	V				14	110328_WaxPromix10ulA10_NH4OH80ACN.3293.3293.3.dta
1					2608	1	1	473.902	1418.69	3	1418.69	-0.0007	89	100	0	52.9	37	42	0.0047	K	SLHTLFGDELCK	V				13	110328_WaxPromix10ulA10_NH4OH80ACN.3128.3128.3.dta
1					2609	1	1	473.902	1418.69	3	1418.69	-0.0007	89	100	0	27.14	30	42	1.8	K	SLHTLFGDELCK	V				7	110328_WaxPromix10ulA10_NH4OH80ACN.4012.4012.3.dta
1					2610	1	1	473.902	1418.69	3	1418.69	-0.0007	89	100	0	38.07	32	42	0.14	K	SLHTLFGDELCK	V				16	110328_WaxPromix10ulA10_NH4OH80ACN.2947.2947.3.dta
1					2611	1	1	473.902	1418.69	3	1418.69	-0.0006	89	100	0	33.7	33	42	0.39	K	SLHTLFGDELCK	V				14	110328_WaxPromix10ulA10_NH4OH80ACN.2883.2883.3.dta
1					2612	1	1	473.902	1418.69	3	1418.69	-0.0006	89	100	0	34.93	31	42	0.3	K	SLHTLFGDELCK	V				8	110328_WaxPromix10ulA10_NH4OH80ACN.4057.4057.3.dta
1					2613	1	1	473.902	1418.69	3	1418.69	-0.0006	89	100	0	30.79	30	42	0.77	K	SLHTLFGDELCK	V				7	110328_WaxPromix10ulA10_NH4OH80ACN.3637.3637.3.dta
1					2614	1	1	473.903	1418.69	3	1418.69	-0.0006	89	100	0	35.6	29	42	0.25	K	SLHTLFGDELCK	V				8	110328_WaxPromix10ulA10_NH4OH80ACN.5352.5352.3.dta
1					2615	1	1	473.903	1418.69	3	1418.69	-0.0005	89	100	0	33.65	29	42	0.4	K	SLHTLFGDELCK	V				7	110328_WaxPromix10ulA10_NH4OH80ACN.4344.4344.3.dta
1					2616	1	1	473.903	1418.69	3	1418.69	-0.0005	89	100	0	41.26	33	42	0.069	K	SLHTLFGDELCK	V				7	110328_WaxPromix10ulA10_NH4OH80ACN.2492.2492.3.dta
1					2617	1	1	473.903	1418.69	3	1418.69	-0.0005	89	100	0	35.06	30	42	0.29	K	SLHTLFGDELCK	V				11	110328_WaxPromix10ulA10_NH4OH80ACN.4491.4491.3.dta
1					2618	1	1	473.903	1418.69	3	1418.69	-0.0005	89	100	0	33.34	28	42	0.43	K	SLHTLFGDELCK	V				12	110328_WaxPromix10ulA10_NH4OH80ACN.2650.2650.3.dta
1					2619	1	1	473.903	1418.69	3	1418.69	-0.0004	89	100	0	40	33	42	0.092	K	SLHTLFGDELCK	V				7	110328_WaxPromix10ulA10_NH4OH80ACN.2437.2437.3.dta
1					2620	1	1	473.903	1418.69	3	1418.69	-0.0004	89	100	0	35.61		42	0.25	K	SLHTLFGDELCK	V				7	110328_WaxPromix10ulA10_NH4OH80ACN.4862.4862.3.dta
1					2621	1	1	710.35	1418.69	2	1418.69	-0.0003	89	100	0	46.88	26	42	0.019	K	SLHTLFGDELCK	V				8	110328_WaxPromix10ulA10_NH4OH80ACN.2281.2281.2.dta
1					2622	1	1	710.35	1418.69	2	1418.69	-0.0003	89	100	0	55.37	27	42	0.0026	K	SLHTLFGDELCK	V				16	110328_WaxPromix10ulA10_NH4OH80ACN.2060.2060.2.dta
1					2623	1	1	710.35	1418.69	2	1418.69	-0.0003	89	100	0	63.71	27	42	0.00038	K	SLHTLFGDELCK	V				9	110328_WaxPromix10ulA10_NH4OH80ACN.2225.2225.2.dta
1					2624	1	1	473.903	1418.69	3	1418.69	-0.0003	89	100	0	35.82	27	42	0.24	K	SLHTLFGDELCK	V				7	110328_WaxPromix10ulA10_NH4OH80ACN.4538.4538.3.dta
1					2625	1	1	473.903	1418.69	3	1418.69	-0.0002	89	100	0	36	37	42	0.23	K	SLHTLFGDELCK	V				12	110328_WaxPromix10ulA10_NH4OH80ACN.3729.3729.3.dta
1					2626	1	1	473.903	1418.69	3	1418.69	-0.0002	89	100	0	38.04	27	42	0.14	K	SLHTLFGDELCK	V				8	110328_WaxPromix10ulA10_NH4OH80ACN.6874.6874.3.dta
1					2627	1	1	473.903	1418.69	3	1418.69	-0.0001	89	100	0	32.09	27	42	0.55	K	SLHTLFGDELCK	V				7	110328_WaxPromix10ulA10_NH4OH80ACN.6526.6526.3.dta
1					2628	1	1	473.903	1418.69	3	1418.69	0	89	100	0	34.97	34	42	0.28	K	SLHTLFGDELCK	V				8	110328_WaxPromix10ulA10_NH4OH80ACN.3349.3349.3.dta
1					2629	1	1	473.903	1418.69	3	1418.69	0.0001	89	100	0	29.58	33	42	0.98	K	SLHTLFGDELCK	V				11	110328_WaxPromix10ulA10_NH4OH80ACN.7188.7188.3.dta
1					2630	1	1	473.903	1418.69	3	1418.69	0.0003	89	100	0	25.26	30	42	2.6	K	SLHTLFGDELCK	V				7	110328_WaxPromix10ulA10_NH4OH80ACN.4636.4636.3.dta
1					2631	1	1	473.903	1418.69	3	1418.69	0.0004	89	100	0	35.5	30	42	0.25	K	SLHTLFGDELCK	V				7	110328_WaxPromix10ulA10_NH4OH80ACN.4394.4394.3.dta
1					2632	1	1	473.903	1418.69	3	1418.69	0.0005	89	100	0	32.31	31	42	0.52	K	SLHTLFGDELCK	V				10	110328_WaxPromix10ulA10_NH4OH80ACN.3594.3594.3.dta
1					2633	1	1	473.903	1418.69	3	1418.69	0.0005	89	100	0	31.74	25	42	0.6	K	SLHTLFGDELCK	V				7	110328_WaxPromix10ulA10_NH4OH80ACN.4251.4251.3.dta
1					2635	1	1	710.351	1418.69	2	1418.69	0.0008	89	100	0	50.61	28	42	0.0078	K	SLHTLFGDELCK	V				9	110328_WaxPromix10ulA10_NH4OH80ACN.2405.2405.2.dta
1					2636	1	1	473.903	1418.69	3	1418.69	0.0009	89	100	0	37.29	28	42	0.17	K	SLHTLFGDELCK	V				14	110328_WaxPromix10ulA10_NH4OH80ACN.3779.3779.3.dta
1					2637	1	1	473.903	1418.69	3	1418.69	0.0009	89	100	0	29.74	28	42	0.95	K	SLHTLFGDELCK	V				7	110328_WaxPromix10ulA10_NH4OH80ACN.4585.4585.3.dta
1					2638	1	1	710.351	1418.69	2	1418.69	0.001	89	100	0	48.3	36	42	0.013	K	SLHTLFGDELCK	V				8	110328_WaxPromix10ulA10_NH4OH80ACN.2339.2339.2.dta
1					2639	1	1	473.903	1418.69	3	1418.69	0.0011	89	100	0	31.99	29	42	0.57	K	SLHTLFGDELCK	V				12	110328_WaxPromix10ulA10_NH4OH80ACN.3548.3548.3.dta
1					2640	1	1	473.903	1418.69	3	1418.69	0.0018	89	100	0	30	26	42	0.86	K	SLHTLFGDELCK	V				7	110328_WaxPromix10ulA10_NH4OH80ACN.5826.5826.3.dta
1					2641	1	1	710.352	1418.69	2	1418.69	0.0029	89	100	0	52.16	28	42	0.0057	K	SLHTLFGDELCK	V				15	110328_WaxPromix10ulA10_NH4OH80ACN.2464.2464.2.dta
1					2642	1	1	473.904	1418.69	3	1418.69	0.0034	89	100	0	34.96	28	42	0.29	K	SLHTLFGDELCK	V				7	110328_WaxPromix10ulA10_NH4OH80ACN.2993.2993.3.dta
1					2643	1	1	1419.7	1418.69	1	1418.69	0.0042	89	100	0	72.19	32	42	5.2e-05	K	SLHTLFGDELCK	V				12	110328_WaxPromix10ulA10_NH4OH80ACN.2098.2098.1.dta
1					2650	1	1	474.235	1419.68	3	1418.69	0.9981	89	100	0	25.72	31	42	2.5	K	SLHTLFGDELCK	V				7	110328_WaxPromix10ulA10_NH4OH80ACN.6454.6454.3.dta
1					2652	1	1	474.236	1419.69	3	1418.69	1.0012	89	100	0	28.8	28	42	1.2	K	SLHTLFGDELCK	V				14	110328_WaxPromix10ulA10_NH4OH80ACN.6583.6583.3.dta
1					2653	1	1	474.237	1419.69	3	1418.69	1.004	89	100	0	27.48	25	42	1.6	K	SLHTLFGDELCK	V				11	110328_WaxPromix10ulA10_NH4OH80ACN.7184.7184.3.dta
1					2686	1	1	360.707	1438.8	4	1438.8	-0.0037	360	371	1	50.48	35	38	0.0029	R	RHPEYAVSVLLR	L				9	110328_WaxPromix10ulA10_NH4OH80ACN.2265.2265.4.dta
1					2687	1	1	360.708	1438.8	4	1438.8	-0.0032	360	371	1	39.42	35	38	0.038	R	RHPEYAVSVLLR	L				7	110328_WaxPromix10ulA10_NH4OH80ACN.2068.2068.4.dta
1					2688	1	1	480.608	1438.8	3	1438.8	-0.0027	360	371	1	57.91	29	38	0.00052	R	RHPEYAVSVLLR	L				14	110328_WaxPromix10ulA10_NH4OH80ACN.3100.3100.3.dta
1					2689	1	1	360.708	1438.8	4	1438.8	-0.0026	360	371	1	40.82	34	38	0.027	R	RHPEYAVSVLLR	L				9	110328_WaxPromix10ulA10_NH4OH80ACN.1896.1896.4.dta
1					2690	1	1	480.608	1438.8	3	1438.8	-0.0026	360	371	1	71.12		38	2.5e-05	R	RHPEYAVSVLLR	L				9	110328_WaxPromix10ulA10_NH4OH80ACN.2249.2249.3.dta
1					2691	1	1	480.608	1438.8	3	1438.8	-0.0025	360	371	1	61.19	34	38	0.00024	R	RHPEYAVSVLLR	L				9	110328_WaxPromix10ulA10_NH4OH80ACN.2031.2031.3.dta
1					2692	1	1	480.608	1438.8	3	1438.8	-0.0023	360	371	1	61.79	31	38	0.00022	R	RHPEYAVSVLLR	L				10	110328_WaxPromix10ulA10_NH4OH80ACN.2414.2414.3.dta
1					2693	1	1	480.608	1438.8	3	1438.8	-0.0022	360	371	1	61.06	29	38	0.00026	R	RHPEYAVSVLLR	L				12	110328_WaxPromix10ulA10_NH4OH80ACN.2577.2577.3.dta
1					2694	1	1	360.708	1438.8	4	1438.8	-0.0021	360	371	1	49.25		38	0.0039	R	RHPEYAVSVLLR	L				9	110328_WaxPromix10ulA10_NH4OH80ACN.2154.2154.4.dta
1					2695	1	1	480.608	1438.8	3	1438.8	-0.0019	360	371	1	71.55		38	2.3e-05	R	RHPEYAVSVLLR	L				10	110328_WaxPromix10ulA10_NH4OH80ACN.1915.1915.3.dta
1					2696	1	1	480.608	1438.8	3	1438.8	-0.0018	360	371	1	66.64	35	38	7.1e-05	R	RHPEYAVSVLLR	L				10	110328_WaxPromix10ulA10_NH4OH80ACN.2802.2802.3.dta
1					2697	1	1	480.608	1438.8	3	1438.8	-0.0018	360	371	1	55.97	36	38	0.00082	R	RHPEYAVSVLLR	L				9	110328_WaxPromix10ulA10_NH4OH80ACN.2084.2084.3.dta
1					2698	1	1	480.608	1438.8	3	1438.8	-0.0017	360	371	1	71.82	33	38	2.1e-05	R	RHPEYAVSVLLR	L				10	110328_WaxPromix10ulA10_NH4OH80ACN.1806.1806.3.dta
1					2699	1	1	720.409	1438.8	2	1438.8	-0.0017	360	371	1	35.74	26	38	0.087	R	RHPEYAVSVLLR	L				11	110328_WaxPromix10ulA10_NH4OH80ACN.2262.2262.2.dta
1					2700	1	1	480.608	1438.8	3	1438.8	-0.0016	360	371	1	71.54	34	38	2.3e-05	R	RHPEYAVSVLLR	L				10	110328_WaxPromix10ulA10_NH4OH80ACN.2634.2634.3.dta
1					2701	1	1	480.608	1438.8	3	1438.8	-0.0016	360	371	1	71.69		37	2.1e-05	R	RHPEYAVSVLLR	L				9	110328_WaxPromix10ulA10_NH4OH80ACN.2303.2303.3.dta
1					2702	1	1	480.608	1438.8	3	1438.8	-0.0016	360	371	1	63.33	31	37	0.00015	R	RHPEYAVSVLLR	L				9	110328_WaxPromix10ulA10_NH4OH80ACN.2915.2915.3.dta
1					2703	1	1	480.608	1438.8	3	1438.8	-0.0015	360	371	1	42.77	32	37	0.016	R	RHPEYAVSVLLR	L				8	110328_WaxPromix10ulA10_NH4OH80ACN.3187.3187.3.dta
1					2704	1	1	480.608	1438.8	3	1438.8	-0.0014	360	371	1	41.27	28	37	0.023	R	RHPEYAVSVLLR	L				8	110328_WaxPromix10ulA10_NH4OH80ACN.3372.3372.3.dta
1					2705	1	1	480.608	1438.8	3	1438.8	-0.0013	360	371	1	60.8		37	0.00026	R	RHPEYAVSVLLR	L				12	110328_WaxPromix10ulA10_NH4OH80ACN.2469.2469.3.dta
1					2706	1	1	480.608	1438.8	3	1438.8	-0.0013	360	371	1	50.9	29	37	0.0025	R	RHPEYAVSVLLR	L				9	110328_WaxPromix10ulA10_NH4OH80ACN.2193.2193.3.dta
1					2707	1	1	720.409	1438.8	2	1438.8	-0.0013	360	371	1	24.62	22	37	1.1	R	RHPEYAVSVLLR	L				12	110328_WaxPromix10ulA10_NH4OH80ACN.2087.2087.2.dta
1					2708	1	1	480.608	1438.8	3	1438.8	-0.0012	360	371	1	62.03	32	37	0.00019	R	RHPEYAVSVLLR	L				15	110328_WaxPromix10ulA10_NH4OH80ACN.1973.1973.3.dta
1					2709	1	1	480.608	1438.8	3	1438.8	-0.0011	360	371	1	71.08	33	37	2.4e-05	R	RHPEYAVSVLLR	L				9	110328_WaxPromix10ulA10_NH4OH80ACN.1698.1698.3.dta
1					2710	1	1	480.608	1438.8	3	1438.8	-0.001	360	371	1	68.33		37	4.5e-05	R	RHPEYAVSVLLR	L				15	110328_WaxPromix10ulA10_NH4OH80ACN.1861.1861.3.dta
1					2711	1	1	480.608	1438.8	3	1438.8	-0.001	360	371	1	65.84		37	8.1e-05	R	RHPEYAVSVLLR	L				15	110328_WaxPromix10ulA10_NH4OH80ACN.2526.2526.3.dta
1					2712	1	1	480.608	1438.8	3	1438.8	-0.0008	360	371	1	51.03	35	37	0.0024	R	RHPEYAVSVLLR	L				8	110328_WaxPromix10ulA10_NH4OH80ACN.3654.3654.3.dta
1					2713	1	1	720.409	1438.8	2	1438.8	-0.0008	360	371	1	61.72	29	37	0.00021	R	RHPEYAVSVLLR	L				15	110328_WaxPromix10ulA10_NH4OH80ACN.1939.1939.2.dta
1					2714	1	1	720.409	1438.8	2	1438.8	-0.0008	360	371	1	49.37		37	0.0036	R	RHPEYAVSVLLR	L				13	110328_WaxPromix10ulA10_NH4OH80ACN.1887.1887.2.dta
1					2715	1	1	480.608	1438.8	3	1438.8	-0.0007	360	371	1	60.93		37	0.00025	R	RHPEYAVSVLLR	L				12	110328_WaxPromix10ulA10_NH4OH80ACN.2690.2690.3.dta
1					2716	1	1	480.609	1438.8	3	1438.8	-0.0005	360	371	1	64.88	31	37	0.0001	R	RHPEYAVSVLLR	L				14	110328_WaxPromix10ulA10_NH4OH80ACN.2360.2360.3.dta
1					2717	1	1	480.609	1438.8	3	1438.8	-0.0004	360	371	1	73.26	32	37	1.4e-05	R	RHPEYAVSVLLR	L				13	110328_WaxPromix10ulA10_NH4OH80ACN.3056.3056.3.dta
1					2718	1	1	480.609	1438.8	3	1438.8	-0.0003	360	371	1	63.83		37	0.00013	R	RHPEYAVSVLLR	L				15	110328_WaxPromix10ulA10_NH4OH80ACN.3013.3013.3.dta
1					2719	1	1	480.609	1438.8	3	1438.8	-0.0002	360	371	1	61.17		37	0.00023	R	RHPEYAVSVLLR	L				12	110328_WaxPromix10ulA10_NH4OH80ACN.1754.1754.3.dta
1					2720	1	1	720.409	1438.8	2	1438.8	-0.0001	360	371	1	42.71	25	37	0.017	R	RHPEYAVSVLLR	L				16	110328_WaxPromix10ulA10_NH4OH80ACN.2211.2211.2.dta
1					2721	1	1	480.609	1438.8	3	1438.8	-0.0001	360	371	1	41.8	30	37	0.02	R	RHPEYAVSVLLR	L				8	110328_WaxPromix10ulA10_NH4OH80ACN.2139.2139.3.dta
1					2722	1	1	480.609	1438.8	3	1438.8	0	360	371	1	59.11		37	0.00038	R	RHPEYAVSVLLR	L				9	110328_WaxPromix10ulA10_NH4OH80ACN.2970.2970.3.dta
1					2723	1	1	480.609	1438.8	3	1438.8	0.0002	360	371	1	53.13	31	37	0.0013	R	RHPEYAVSVLLR	L				7	110328_WaxPromix10ulA10_NH4OH80ACN.3586.3586.3.dta
1					2724	1	1	480.609	1438.8	3	1438.8	0.0004	360	371	1	62.6		37	0.00015	R	RHPEYAVSVLLR	L				15	110328_WaxPromix10ulA10_NH4OH80ACN.3231.3231.3.dta
1					2725	1	1	480.609	1438.81	3	1438.8	0.0005	360	371	1	49.89	30	37	0.0027	R	RHPEYAVSVLLR	L				16	110328_WaxPromix10ulA10_NH4OH80ACN.3143.3143.3.dta
1					2726	1	1	480.609	1438.81	3	1438.8	0.0005	360	371	1	46.85	29	37	0.0055	R	RHPEYAVSVLLR	L				7	110328_WaxPromix10ulA10_NH4OH80ACN.3783.3783.3.dta
1					2727	1	1	480.609	1438.81	3	1438.8	0.0005	360	371	1	53.99	31	37	0.0011	R	RHPEYAVSVLLR	L				9	110328_WaxPromix10ulA10_NH4OH80ACN.2858.2858.3.dta
1					2728	1	1	720.41	1438.81	2	1438.8	0.0006	360	371	1	29.14	23	37	0.32	R	RHPEYAVSVLLR	L				8	110328_WaxPromix10ulA10_NH4OH80ACN.2321.2321.2.dta
1					2729	1	1	480.609	1438.81	3	1438.8	0.0008	360	371	1	60.93	33	37	0.00023	R	RHPEYAVSVLLR	L				8	110328_WaxPromix10ulA10_NH4OH80ACN.3483.3483.3.dta
1					2730	1	1	720.41	1438.81	2	1438.8	0.0009	360	371	1	40.94	26	37	0.023	R	RHPEYAVSVLLR	L				13	110328_WaxPromix10ulA10_NH4OH80ACN.2040.2040.2.dta
1					2731	1	1	720.41	1438.81	2	1438.8	0.0009	360	371	1	37.93	21	37	0.046	R	RHPEYAVSVLLR	L				12	110328_WaxPromix10ulA10_NH4OH80ACN.2607.2607.2.dta
1					2732	1	1	720.41	1438.81	2	1438.8	0.0011	360	371	1	49.15	22	37	0.0036	R	RHPEYAVSVLLR	L				9	110328_WaxPromix10ulA10_NH4OH80ACN.1731.1731.2.dta
1					2733	1	1	360.709	1438.81	4	1438.8	0.0012	360	371	1	58.99	34	37	0.00036	R	RHPEYAVSVLLR	L				7	110328_WaxPromix10ulA10_NH4OH80ACN.1997.1997.4.dta
1					2734	1	1	720.41	1438.81	2	1438.8	0.0012	360	371	1	45.81	27	37	0.0075	R	RHPEYAVSVLLR	L				13	110328_WaxPromix10ulA10_NH4OH80ACN.1833.1833.2.dta
1					2735	1	1	480.609	1438.81	3	1438.8	0.0013	360	371	1	56.33	28	37	0.00066	R	RHPEYAVSVLLR	L				9	110328_WaxPromix10ulA10_NH4OH80ACN.2746.2746.3.dta
1					2736	1	1	720.41	1438.81	2	1438.8	0.002	360	371	1	37.68	27	37	0.046	R	RHPEYAVSVLLR	L				13	110328_WaxPromix10ulA10_NH4OH80ACN.2517.2517.2.dta
1					2738	1	1	720.411	1438.81	2	1438.8	0.0027	360	371	1	45.55	27	37	0.0084	R	RHPEYAVSVLLR	L				16	110328_WaxPromix10ulA10_NH4OH80ACN.1984.1984.2.dta
1					2759	1	1	722.321	1442.63	2	1442.63	-0.0072	286	297	0	74.44		41	2.7e-05	K	YICDNQDTISSK	L				10	110328_WaxPromix10ulA10_NH4OH80ACN.3496.3496.2.dta
1					2760	1	1	722.322	1442.63	2	1442.63	-0.0056	286	297	0	73.8	41	42	3.4e-05	K	YICDNQDTISSK	L				10	110328_WaxPromix10ulA10_NH4OH80ACN.3542.3542.2.dta
1					2761	1	1	722.324	1442.63	2	1442.63	-0.0022	286	297	0	51.25	31	42	0.0061	K	YICDNQDTISSK	L				10	110328_WaxPromix10ulA10_NH4OH80ACN.4262.4262.2.dta
1					2762	1	1	722.324	1442.63	2	1442.63	-0.0021	286	297	0	66.11	41	42	0.0002	K	YICDNQDTISSK	L				9	110328_WaxPromix10ulA10_NH4OH80ACN.3452.3452.2.dta
1					2763	1	1	722.324	1442.63	2	1442.63	-0.0007	286	297	0	34.6	27	42	0.28	K	YICDNQDTISSK	L				14	110328_WaxPromix10ulA10_NH4OH80ACN.4307.4307.2.dta
1					2765	1	1	722.325	1442.63	2	1442.63	-0.0001	286	297	0	44.82	30	42	0.027	K	YICDNQDTISSK	L				7	110328_WaxPromix10ulA10_NH4OH80ACN.4354.4354.2.dta
1					2767	1	1	722.325	1442.64	2	1442.63	0.0004	286	297	0	52.33	34	42	0.0048	K	YICDNQDTISSK	L				9	110328_WaxPromix10ulA10_NH4OH80ACN.3818.3818.2.dta
1					2768	1	1	722.325	1442.64	2	1442.63	0.0007	286	297	0	60.47	39	42	0.00075	K	YICDNQDTISSK	L				10	110328_WaxPromix10ulA10_NH4OH80ACN.3724.3724.2.dta
1					2769	1	1	722.325	1442.64	2	1442.63	0.0008	286	297	0	37.37	28	42	0.15	K	YICDNQDTISSK	L				8	110328_WaxPromix10ulA10_NH4OH80ACN.4164.4164.2.dta
1					2770	1	1	722.325	1442.64	2	1442.63	0.0009	286	297	0	33.67	30	42	0.36	K	YICDNQDTISSK	L				9	110328_WaxPromix10ulA10_NH4OH80ACN.4120.4120.2.dta
1					2771	1	1	722.325	1442.64	2	1442.63	0.0013	286	297	0	61.35	38	42	0.00061	K	YICDNQDTISSK	L				10	110328_WaxPromix10ulA10_NH4OH80ACN.3679.3679.2.dta
1					2772	1	1	722.325	1442.64	2	1442.63	0.0014	286	297	0	67.81		42	0.00014	K	YICDNQDTISSK	L				9	110328_WaxPromix10ulA10_NH4OH80ACN.3411.3411.2.dta
1					2773	1	1	722.325	1442.64	2	1442.63	0.0015	286	297	0	44.56	32	42	0.029	K	YICDNQDTISSK	L				13	110328_WaxPromix10ulA10_NH4OH80ACN.3772.3772.2.dta
1					2774	1	1	722.325	1442.64	2	1442.63	0.0015	286	297	0	71.09	37	42	6.3e-05	K	YICDNQDTISSK	L				10	110328_WaxPromix10ulA10_NH4OH80ACN.3590.3590.2.dta
1					2775	1	1	722.325	1442.64	2	1442.63	0.0015	286	297	0	64.11	41	42	0.00031	K	YICDNQDTISSK	L				18	110328_WaxPromix10ulA10_NH4OH80ACN.3634.3634.2.dta
1					2776	1	1	722.326	1442.64	2	1442.63	0.0021	286	297	0	49.9	27	42	0.0083	K	YICDNQDTISSK	L				9	110328_WaxPromix10ulA10_NH4OH80ACN.4404.4404.2.dta
1					2781	1	1	722.817	1443.62	2	1443.62	-0.0002	286	297	0	43.99	28	41	0.03	K	YICDNQDTISSK	L		Deamidated (NQ)	0.000040000000.0	9	110328_WaxPromix10ulA10_NH4OH80ACN.4849.4849.2.dta
1					2782	1	1	722.817	1443.62	2	1443.62	-0.0001	286	297	0	48.88	31	41	0.0094	K	YICDNQDTISSK	L		Deamidated (NQ)	0.000040000000.0	9	110328_WaxPromix10ulA10_NH4OH80ACN.4898.4898.2.dta
1					2783	1	1	722.817	1443.62	2	1443.62	0.0001	286	297	0	44.93	29	41	0.023	K	YICDNQDTISSK	L		Deamidated (NQ)	0.000004000000.0	9	110328_WaxPromix10ulA10_NH4OH80ACN.4945.4945.2.dta
1					2784	1	1	722.817	1443.62	2	1443.62	0.0007	286	297	0	34.94	26	41	0.24	K	YICDNQDTISSK	L		Deamidated (NQ)	0.000040000000.0	8	110328_WaxPromix10ulA10_NH4OH80ACN.4803.4803.2.dta
1					2785	1	1	722.817	1443.62	2	1443.62	0.0008	286	297	0	70.36	39	41	6.9e-05	K	YICDNQDTISSK	L		Deamidated (NQ)	0.000040000000.0	10	110328_WaxPromix10ulA10_NH4OH80ACN.6116.6116.2.dta
1					2786	1	1	722.817	1443.62	2	1443.62	0.0016	286	297	0	59.09	34	41	0.00089	K	YICDNQDTISSK	L		Deamidated (NQ)	0.000040000000.0	18	110328_WaxPromix10ulA10_NH4OH80ACN.6210.6210.2.dta
1					2787	1	1	722.817	1443.62	2	1443.62	0.0016	286	297	0	44.95	35	41	0.023	K	YICDNQDTISSK	L		Deamidated (NQ)	0.000040000000.0	10	110328_WaxPromix10ulA10_NH4OH80ACN.6069.6069.2.dta
1					2788	1	1	722.818	1443.62	2	1443.62	0.002	286	297	0	57.2	33	41	0.0014	K	YICDNQDTISSK	L		Deamidated (NQ)	0.000040000000.0	10	110328_WaxPromix10ulA10_NH4OH80ACN.6164.6164.2.dta
1					2789	1	1	722.818	1443.62	2	1443.62	0.0022	286	297	0	23.13	18	41	3.8	K	YICDNQDTISSK	L		Deamidated (NQ)	0.000040000000.0	14	110328_WaxPromix10ulA10_NH4OH80ACN.6282.6282.2.dta
1					2790	1	1	722.818	1443.62	2	1443.62	0.0025	286	297	0	25.99	27	41	1.9	K	YICDNQDTISSK	L		Deamidated (NQ)	0.000040000000.0	12	110328_WaxPromix10ulA10_NH4OH80ACN.4993.4993.2.dta
1					2867	1	1	488.533	1462.58	3	1462.58	-0.0047	76	88	0	36.62	30	39	0.11	K	TCVADESHAGCEK	S				13	110328_WaxPromix10ulA10_NH4OH80ACN.3274.3274.3.dta
1					2868	1	1	488.534	1462.58	3	1462.58	-0.0027	76	88	0	33.35	32	40	0.25	K	TCVADESHAGCEK	S				7	110328_WaxPromix10ulA10_NH4OH80ACN.3228.3228.3.dta
1					2869	1	1	488.534	1462.58	3	1462.58	-0.0024	76	88	0	29.48	33	40	0.61	K	TCVADESHAGCEK	S				15	110328_WaxPromix10ulA10_NH4OH80ACN.3367.3367.3.dta
1					2871	1	1	488.534	1462.58	3	1462.58	-0.0014	76	88	0	26.35	30	40	1.2	K	TCVADESHAGCEK	S				8	110328_WaxPromix10ulA10_NH4OH80ACN.3186.3186.3.dta
1					2872	1	1	488.534	1462.58	3	1462.58	-0.0012	76	88	0	35.41	33	40	0.15	K	TCVADESHAGCEK	S				8	110328_WaxPromix10ulA10_NH4OH80ACN.3320.3320.3.dta
1					2873	1	1	732.298	1462.58	2	1462.58	-0.0012	76	88	0	57.76	33	40	0.00088	K	TCVADESHAGCEK	S				7	110328_WaxPromix10ulA10_NH4OH80ACN.3334.3334.2.dta
1					2874	1	1	732.298	1462.58	2	1462.58	-0.001	76	88	0	68.95		40	7e-05	K	TCVADESHAGCEK	S				9	110328_WaxPromix10ulA10_NH4OH80ACN.3285.3285.2.dta
1					2875	1	1	488.534	1462.58	3	1462.58	-0.0009	76	88	0	33.56	32	40	0.24	K	TCVADESHAGCEK	S				8	110328_WaxPromix10ulA10_NH4OH80ACN.3413.3413.3.dta
1					2876	1	1	732.298	1462.58	2	1462.58	-0.0009	76	88	0	64.17	39	40	0.00021	K	TCVADESHAGCEK	S				10	110328_WaxPromix10ulA10_NH4OH80ACN.3240.3240.2.dta
1					2878	1	1	488.534	1462.58	3	1462.58	-0.0002	76	88	0	29.36	28	40	0.62	K	TCVADESHAGCEK	S				15	110328_WaxPromix10ulA10_NH4OH80ACN.3638.3638.3.dta
1					2879	1	1	488.534	1462.58	3	1462.58	0	76	88	0	28.87	31	40	0.66	K	TCVADESHAGCEK	S				8	110328_WaxPromix10ulA10_NH4OH80ACN.3458.3458.3.dta
1					2880	1	1	488.535	1462.58	3	1462.58	0.0004	76	88	0	25.17	28	40	1.6	K	TCVADESHAGCEK	S				13	110328_WaxPromix10ulA10_NH4OH80ACN.3545.3545.3.dta
1					2881	1	1	488.535	1462.58	3	1462.58	0.0004	76	88	0	29.69	32	40	0.56	K	TCVADESHAGCEK	S				16	110328_WaxPromix10ulA10_NH4OH80ACN.3498.3498.3.dta
1					2882	1	1	732.298	1462.58	2	1462.58	0.0005	76	88	0	51.85	34	40	0.0034	K	TCVADESHAGCEK	S				9	110328_WaxPromix10ulA10_NH4OH80ACN.3199.3199.2.dta
1					2883	1	1	732.299	1462.58	2	1462.58	0.0016	76	88	0	28.65	20	40	0.71	K	TCVADESHAGCEK	S				18	110328_WaxPromix10ulA10_NH4OH80ACN.3558.3558.2.dta
1					2884	1	1	732.299	1462.58	2	1462.58	0.0017	76	88	0	26.58	20	40	1.1	K	TCVADESHAGCEK	S				14	110328_WaxPromix10ulA10_NH4OH80ACN.3459.3459.2.dta
1					2885	1	1	732.299	1462.58	2	1462.58	0.0027	76	88	0	27.08	23	40	1.1	K	TCVADESHAGCEK	S				9	110328_WaxPromix10ulA10_NH4OH80ACN.3468.3468.2.dta
1					2886	1	1	732.3	1462.59	2	1462.58	0.0046	76	88	0	49.54	30	40	0.0066	K	TCVADESHAGCEK	S				8	110328_WaxPromix10ulA10_NH4OH80ACN.3416.3416.2.dta
1					2959	1	1	739.764	1477.51	2	1477.52	-0.0027	106	117	0	42.91	22	37	0.013	R	ETYGDMADCCEK	Q				8	110328_WaxPromix10ulA10_NH4OH80ACN.6722.6722.2.dta
1					2960	1	1	739.764	1477.51	2	1477.52	-0.0023	106	117	0	80.34	26	36	2.3e-06	R	ETYGDMADCCEK	Q				9	110328_WaxPromix10ulA10_NH4OH80ACN.6000.6000.2.dta
1					2961	1	1	739.764	1477.51	2	1477.52	-0.0015	106	117	0	36.15	18	37	0.062	R	ETYGDMADCCEK	Q				8	110328_WaxPromix10ulA10_NH4OH80ACN.6294.6294.2.dta
1					2962	1	1	739.765	1477.52	2	1477.52	-0.0004	106	117	0	36.18	19	37	0.063	R	ETYGDMADCCEK	Q				8	110328_WaxPromix10ulA10_NH4OH80ACN.5856.5856.2.dta
1					2963	1	1	739.765	1477.52	2	1477.52	-0.0001	106	117	0	54.86	24	37	0.00085	R	ETYGDMADCCEK	Q				9	110328_WaxPromix10ulA10_NH4OH80ACN.6198.6198.2.dta
1					2964	1	1	739.765	1477.52	2	1477.52	0.0003	106	117	0	69.04	23	37	3.6e-05	R	ETYGDMADCCEK	Q				10	110328_WaxPromix10ulA10_NH4OH80ACN.6659.6659.2.dta
1					2965	1	1	739.766	1477.52	2	1477.52	0.0007	106	117	0	77.06	25	37	5.5e-06	R	ETYGDMADCCEK	Q				9	110328_WaxPromix10ulA10_NH4OH80ACN.6152.6152.2.dta
1					2966	1	1	739.766	1477.52	2	1477.52	0.0012	106	117	0	22.23	21	37	1.8	R	ETYGDMADCCEK	Q				8	110328_WaxPromix10ulA10_NH4OH80ACN.6403.6403.2.dta
1					2967	1	1	739.766	1477.52	2	1477.52	0.0017	106	117	0	72.23	24	37	1.7e-05	R	ETYGDMADCCEK	Q				9	110328_WaxPromix10ulA10_NH4OH80ACN.5900.5900.2.dta
1					2968	1	1	739.766	1477.52	2	1477.52	0.0024	106	117	0	35.57	25	37	0.075	R	ETYGDMADCCEK	Q				8	110328_WaxPromix10ulA10_NH4OH80ACN.6245.6245.2.dta
1					2969	1	1	739.767	1477.52	2	1477.52	0.0037	106	117	0	43.49	17	37	0.012	R	ETYGDMADCCEK	Q				9	110328_WaxPromix10ulA10_NH4OH80ACN.6639.6639.2.dta
1					2970	1	1	739.767	1477.52	2	1477.52	0.0039	106	117	0	25.98	20	37	0.69	R	ETYGDMADCCEK	Q				7	110328_WaxPromix10ulA10_NH4OH80ACN.6796.6796.2.dta
1					2971	1	1	740.398	1478.78	2	1478.79	-0.0067	421	433	0	83.05	37	41	3.6e-06	K	LGEYGFQNALIVR	Y				10	110328_WaxPromix10ulA10_NH4OH80ACN.1177.1177.2.dta
1					2972	1	1	740.398	1478.78	2	1478.79	-0.0067	421	433	0	89.55	37	41	8e-07	K	LGEYGFQNALIVR	Y				9	110328_WaxPromix10ulA10_NH4OH80ACN.1122.1122.2.dta
1					2973	1	1	740.399	1478.78	2	1478.79	-0.0048	421	433	0	80.07	37	41	6.8e-06	K	LGEYGFQNALIVR	Y				10	110328_WaxPromix10ulA10_NH4OH80ACN.1232.1232.2.dta
1					2974	1	1	493.936	1478.79	3	1478.79	-0.0025	421	433	0	34.22	35	41	0.27	K	LGEYGFQNALIVR	Y				15	110328_WaxPromix10ulA10_NH4OH80ACN.1296.1296.3.dta
1					2975	1	1	740.4	1478.79	2	1478.79	-0.0025	421	433	0	61.14	35	41	0.00056	K	LGEYGFQNALIVR	Y				9	110328_WaxPromix10ulA10_NH4OH80ACN.1617.1617.2.dta
1					2976	1	1	740.4	1478.79	2	1478.79	-0.0024	421	433	0	89.62	38	41	7.8e-07	K	LGEYGFQNALIVR	Y				9	110328_WaxPromix10ulA10_NH4OH80ACN.1078.1078.2.dta
1					2977	1	1	740.4	1478.79	2	1478.79	-0.0021	421	433	0	80.15	37	41	6.9e-06	K	LGEYGFQNALIVR	Y				10	110328_WaxPromix10ulA10_NH4OH80ACN.1288.1288.2.dta
1					2978	1	1	740.401	1478.79	2	1478.79	-0.0015	421	433	0	60.45	31	41	0.00068	K	LGEYGFQNALIVR	Y				9	110328_WaxPromix10ulA10_NH4OH80ACN.1564.1564.2.dta
1					2979	1	1	740.401	1478.79	2	1478.79	-0.0014	421	433	0	31	36	41	0.6	K	LGEYGFQNALIVR	Y				16	110328_WaxPromix10ulA10_NH4OH80ACN.1844.1844.2.dta
1					2980	1	1	740.401	1478.79	2	1478.79	-0.0012	421	433	0	85.83	36	41	1.9e-06	K	LGEYGFQNALIVR	Y				10	110328_WaxPromix10ulA10_NH4OH80ACN.1672.1672.2.dta
1					2981	1	1	740.401	1478.79	2	1478.79	-0.0006	421	433	0	70.38	36	41	6.5e-05	K	LGEYGFQNALIVR	Y				10	110328_WaxPromix10ulA10_NH4OH80ACN.1510.1510.2.dta
1					2982	1	1	493.937	1478.79	3	1478.79	-0.0005	421	433	0	73.27		41	3.3e-05	K	LGEYGFQNALIVR	Y				9	110328_WaxPromix10ulA10_NH4OH80ACN.1178.1178.3.dta
1					2983	1	1	740.401	1478.79	2	1478.79	-0.0004	421	433	0	68.82	37	41	9.3e-05	K	LGEYGFQNALIVR	Y				10	110328_WaxPromix10ulA10_NH4OH80ACN.1403.1403.2.dta
1					2984	1	1	493.937	1478.79	3	1478.79	-0.0004	421	433	0	52.02	40	41	0.0045	K	LGEYGFQNALIVR	Y				9	110328_WaxPromix10ulA10_NH4OH80ACN.1236.1236.3.dta
1					2985	1	1	493.937	1478.79	3	1478.79	-0.0004	421	433	0	67.22		41	0.00014	K	LGEYGFQNALIVR	Y				8	110328_WaxPromix10ulA10_NH4OH80ACN.1124.1124.3.dta
1					2986	1	1	740.401	1478.79	2	1478.79	-0.0003	421	433	0	58.82	34	41	0.00094	K	LGEYGFQNALIVR	Y				10	110328_WaxPromix10ulA10_NH4OH80ACN.1945.1945.2.dta
1					2987	1	1	740.401	1478.79	2	1478.79	0	421	433	0	73.66	37	41	3e-05	K	LGEYGFQNALIVR	Y				10	110328_WaxPromix10ulA10_NH4OH80ACN.1456.1456.2.dta
1					2988	1	1	493.937	1478.79	3	1478.79	0	421	433	0	60.34		41	0.00065	K	LGEYGFQNALIVR	Y				8	110328_WaxPromix10ulA10_NH4OH80ACN.1086.1086.3.dta
1					2989	1	1	740.401	1478.79	2	1478.79	0.0001	421	433	0	86.06	37	41	1.8e-06	K	LGEYGFQNALIVR	Y				10	110328_WaxPromix10ulA10_NH4OH80ACN.1347.1347.2.dta
1					2990	1	1	740.403	1478.79	2	1478.79	0.0022	421	433	0	61.78	37	41	0.00042	K	LGEYGFQNALIVR	Y				10	110328_WaxPromix10ulA10_NH4OH80ACN.1744.1744.2.dta
1					2991	1	1	740.403	1478.79	2	1478.79	0.0028	421	433	0	75.02	35	41	2.1e-05	K	LGEYGFQNALIVR	Y				11	110328_WaxPromix10ulA10_NH4OH80ACN.2101.2101.2.dta
1					2992	1	1	740.403	1478.79	2	1478.79	0.0032	421	433	0	69.05	39	41	8.2e-05	K	LGEYGFQNALIVR	Y				10	110328_WaxPromix10ulA10_NH4OH80ACN.1043.1043.2.dta
1					2993	1	1	1479.8	1478.79	1	1478.79	0.0058	421	433	0	40.85	23	41	0.054	K	LGEYGFQNALIVR	Y				7	110328_WaxPromix10ulA10_NH4OH80ACN.1218.1218.1.dta
1					2994	1	1	1479.8	1478.79	1	1478.79	0.0067	421	433	0	27.38	21	41	1.2	K	LGEYGFQNALIVR	Y				6	110328_WaxPromix10ulA10_NH4OH80ACN.1161.1161.1.dta
1					2996	1	1	740.765	1479.52	2	1477.52	1.9997	106	117	0	33.21	23	37	0.13	R	ETYGDMADCCEK	Q				8	110328_WaxPromix10ulA10_NH4OH80ACN.6809.6809.2.dta
1					2997	1	1	740.765	1479.52	2	1477.52	2	106	117	0	23.36	17	37	1.3	R	ETYGDMADCCEK	Q				7	110328_WaxPromix10ulA10_NH4OH80ACN.6552.6552.2.dta
1					2998	1	1	740.767	1479.52	2	1477.52	2.0027	106	117	0	20.3	18	37	2.5	R	ETYGDMADCCEK	Q				9	110328_WaxPromix10ulA10_NH4OH80ACN.6413.6413.2.dta
1					2999	1	1	740.767	1479.52	2	1477.52	2.0028	106	117	0	25.65		37	0.72	R	ETYGDMADCCEK	Q				8	110328_WaxPromix10ulA10_NH4OH80ACN.6358.6358.2.dta
1					3002	1	1	740.892	1479.77	2	1479.77	-0.0032	421	433	0	76.84	34	42	1.7e-05	K	LGEYGFQNALIVR	Y		Deamidated (NQ)	0.0000000400000.0	10	110328_WaxPromix10ulA10_NH4OH80ACN.1907.1907.2.dta
1					3003	1	1	740.893	1479.77	2	1479.77	-0.0002	421	433	0	84.32	39	42	2.9e-06	K	LGEYGFQNALIVR	Y		Deamidated (NQ)	0.0000000400000.0	9	110328_WaxPromix10ulA10_NH4OH80ACN.2277.2277.2.dta
1					3004	1	1	740.893	1479.77	2	1479.77	0.0001	421	433	0	79.73	36	42	8.5e-06	K	LGEYGFQNALIVR	Y		Deamidated (NQ)	0.0000000400000.0	10	110328_WaxPromix10ulA10_NH4OH80ACN.1855.1855.2.dta
1					3005	1	1	740.894	1479.77	2	1479.77	0.0006	421	433	0	74.43	32	41	2.8e-05	K	LGEYGFQNALIVR	Y		Deamidated (NQ)	0.0000000400000.0	9	110328_WaxPromix10ulA10_NH4OH80ACN.2326.2326.2.dta
1					3043	1	1	747.764	1493.51	2	1493.51	0.0016	106	117	0	44.3	27	36	0.0089	R	ETYGDMADCCEK	Q		Oxidation (M)	0.000001000000.0	8	110328_WaxPromix10ulA10_NH4OH80ACN.6366.6366.2.dta
1					3044	1	1	747.764	1493.51	2	1493.51	0.0023	106	117	0	45.48	22	36	0.0067	R	ETYGDMADCCEK	Q		Oxidation (M)	0.000001000000.0	8	110328_WaxPromix10ulA10_NH4OH80ACN.6319.6319.2.dta
1					3045	1	1	748.264	1494.51	2	1493.51	1.0034	106	117	0	37.19	26	37	0.048	R	ETYGDMADCCEK	Q		Oxidation (M)	0.000001000000.0	7	110328_WaxPromix10ulA10_NH4OH80ACN.6426.6426.2.dta
1					3079	1	1	751.807	1501.6	2	1501.61	-0.0071	375	386	0	57.59	30	40	0.001	K	EYEATLEECCAK	D				9	110328_WaxPromix10ulA10_NH4OH80ACN.4363.4363.2.dta
1					3080	1	1	751.807	1501.6	2	1501.61	-0.0066	375	386	0	53.17	29	40	0.0029	K	EYEATLEECCAK	D				16	110328_WaxPromix10ulA10_NH4OH80ACN.4317.4317.2.dta
1					3081	1	1	751.807	1501.6	2	1501.61	-0.0064	375	386	0	47.76	29	40	0.01	K	EYEATLEECCAK	D				7	110328_WaxPromix10ulA10_NH4OH80ACN.4413.4413.2.dta
1					3082	1	1	751.808	1501.6	2	1501.61	-0.0048	375	386	0	54.96	30	41	0.002	K	EYEATLEECCAK	D				8	110328_WaxPromix10ulA10_NH4OH80ACN.4271.4271.2.dta
1					3083	1	1	751.809	1501.6	2	1501.61	-0.0036	375	386	0	22.7	22	40	3.4	K	EYEATLEECCAK	D				6	110328_WaxPromix10ulA10_NH4OH80ACN.4972.4972.2.dta
1					3084	1	1	751.809	1501.6	2	1501.61	-0.003	375	386	0	51.95	28	40	0.004	K	EYEATLEECCAK	D				10	110328_WaxPromix10ulA10_NH4OH80ACN.4462.4462.2.dta
1					3086	1	1	751.81	1501.6	2	1501.61	-0.0019	375	386	0	20.7	28	41	5.5	K	EYEATLEECCAK	D				5	110328_WaxPromix10ulA10_NH4OH80ACN.4923.4923.2.dta
1					3087	1	1	501.542	1501.61	3	1501.61	-0.0011	375	386	0	28.4	36	41	0.93	K	EYEATLEECCAK	D				11	110328_WaxPromix10ulA10_NH4OH80ACN.4308.4308.3.dta
1					3088	1	1	751.81	1501.61	2	1501.61	-0.0008	375	386	0	38.21	25	41	0.097	K	EYEATLEECCAK	D				8	110328_WaxPromix10ulA10_NH4OH80ACN.4843.4843.2.dta
1					3089	1	1	501.543	1501.61	3	1501.61	-0.0008	375	386	0	25.05	30	41	2	K	EYEATLEECCAK	D				12	110328_WaxPromix10ulA10_NH4OH80ACN.4359.4359.3.dta
1					3090	1	1	751.81	1501.61	2	1501.61	-0.0006	375	386	0	63.04	30	41	0.00032	K	EYEATLEECCAK	D				8	110328_WaxPromix10ulA10_NH4OH80ACN.4224.4224.2.dta
1					3091	1	1	751.811	1501.61	2	1501.61	0	375	386	0	54.41	28	41	0.0023	K	EYEATLEECCAK	D				7	110328_WaxPromix10ulA10_NH4OH80ACN.4509.4509.2.dta
1					3092	1	1	751.811	1501.61	2	1501.61	0.0008	375	386	0	47.67	27	41	0.011	K	EYEATLEECCAK	D				7	110328_WaxPromix10ulA10_NH4OH80ACN.4653.4653.2.dta
1					3093	1	1	751.811	1501.61	2	1501.61	0.0008	375	386	0	42.08	30	41	0.041	K	EYEATLEECCAK	D				7	110328_WaxPromix10ulA10_NH4OH80ACN.4713.4713.2.dta
1					3094	1	1	751.811	1501.61	2	1501.61	0.0009	375	386	0	47.51	29	41	0.012	K	EYEATLEECCAK	D				7	110328_WaxPromix10ulA10_NH4OH80ACN.4605.4605.2.dta
1					3095	1	1	751.811	1501.61	2	1501.61	0.0016	375	386	0	33.6	22	41	0.28	K	EYEATLEECCAK	D				8	110328_WaxPromix10ulA10_NH4OH80ACN.4759.4759.2.dta
1					3096	1	1	751.811	1501.61	2	1501.61	0.0018	375	386	0	47.55	27	41	0.011	K	EYEATLEECCAK	D				10	110328_WaxPromix10ulA10_NH4OH80ACN.4558.4558.2.dta
1					3097	1	1	751.812	1501.61	2	1501.61	0.0019	375	386	0	49.62	24	40	0.0067	K	EYEATLEECCAK	D				8	110328_WaxPromix10ulA10_NH4OH80ACN.4805.4805.2.dta
1					3139	1	1	756.424	1510.83	2	1510.84	-0.0022	438	451	0	63.71	26	38	0.00017	K	VPQVSTPTLVEVSR	S				10	110328_WaxPromix10ulA10_NH4OH80ACN.1803.1803.2.dta
1					3140	1	1	504.618	1510.83	3	1510.84	-0.002	438	451	0	35.91	32	38	0.098	K	VPQVSTPTLVEVSR	S				13	110328_WaxPromix10ulA10_NH4OH80ACN.1830.1830.3.dta
1					3141	1	1	756.424	1510.83	2	1510.84	-0.0011	438	451	0	40.87	20	38	0.03	K	VPQVSTPTLVEVSR	S				7	110328_WaxPromix10ulA10_NH4OH80ACN.1653.1653.2.dta
1					3142	1	1	504.619	1510.83	3	1510.84	-0.0009	438	451	0	36.47	29	38	0.083	K	VPQVSTPTLVEVSR	S				6	110328_WaxPromix10ulA10_NH4OH80ACN.1722.1722.3.dta
1					3143	1	1	504.619	1510.84	3	1510.84	0.0002	438	451	0	58.97	34	38	0.00044	K	VPQVSTPTLVEVSR	S				10	110328_WaxPromix10ulA10_NH4OH80ACN.1771.1771.3.dta
1					3144	1	1	756.426	1510.84	2	1510.84	0.0015	438	451	0	33.7	18	38	0.15	K	VPQVSTPTLVEVSR	S				8	110328_WaxPromix10ulA10_NH4OH80ACN.1950.1950.2.dta
1					3145	1	1	756.427	1510.84	2	1510.84	0.004	438	451	0	80.83	25	38	2.9e-06	K	VPQVSTPTLVEVSR	S				11	110328_WaxPromix10ulA10_NH4OH80ACN.1749.1749.2.dta
1					3242	1	1	511.598	1531.77	3	1531.77	-0.0016	298	309	1	43.76	31	42	0.04	K	LKECCDKPLLEK	S				9	110328_WaxPromix10ulA10_NH4OH80ACN.2222.2222.3.dta
1					3243	1	1	383.95	1531.77	4	1531.77	-0.0016	298	309	1	38.45	40	42	0.14	K	LKECCDKPLLEK	S				14	110328_WaxPromix10ulA10_NH4OH80ACN.2219.2219.4.dta
1					3244	1	1	383.95	1531.77	4	1531.77	-0.0016	298	309	1	29.7	34	42	1	K	LKECCDKPLLEK	S				10	110328_WaxPromix10ulA10_NH4OH80ACN.2271.2271.4.dta
1					3245	1	1	511.598	1531.77	3	1531.77	-0.0016	298	309	1	22.6	28	42	5.3	K	LKECCDKPLLEK	S				9	110328_WaxPromix10ulA10_NH4OH80ACN.2408.2408.3.dta
1					3246	1	1	383.95	1531.77	4	1531.77	-0.001	298	309	1	27.23	36	42	1.8	K	LKECCDKPLLEK	S				12	110328_WaxPromix10ulA10_NH4OH80ACN.2439.2439.4.dta
1					3247	1	1	383.95	1531.77	4	1531.77	-0.0007	298	309	1	26.9	34	42	1.9	K	LKECCDKPLLEK	S				12	110328_WaxPromix10ulA10_NH4OH80ACN.2327.2327.4.dta
1					3248	1	1	383.951	1531.77	4	1531.77	-0.0007	298	309	1	30.97		42	0.77	K	LKECCDKPLLEK	S				11	110328_WaxPromix10ulA10_NH4OH80ACN.2387.2387.4.dta
1					3249	1	1	766.894	1531.77	2	1531.77	-0.0006	298	309	1	47	35	42	0.019	K	LKECCDKPLLEK	S				8	110328_WaxPromix10ulA10_NH4OH80ACN.2233.2233.2.dta
1					3250	1	1	511.598	1531.77	3	1531.77	-0.0006	298	309	1	35.31	34	42	0.28	K	LKECCDKPLLEK	S				9	110328_WaxPromix10ulA10_NH4OH80ACN.2329.2329.3.dta
1					3251	1	1	511.599	1531.77	3	1531.77	-0.0003	298	309	1	34.31	35	42	0.36	K	LKECCDKPLLEK	S				9	110328_WaxPromix10ulA10_NH4OH80ACN.2273.2273.3.dta
1					3252	1	1	766.896	1531.78	2	1531.77	0.0028	298	309	1	53.27	35	42	0.0043	K	LKECCDKPLLEK	S				9	110328_WaxPromix10ulA10_NH4OH80ACN.2298.2298.2.dta
1					3373	1	1	518.887	1553.64	3	1553.65	-0.0052	387	399	0	45.86	31	41	0.02	K	DDPHACYSTVFDK	L				9	110328_WaxPromix10ulA10_NH4OH80ACN.3747.3747.3.dta
1					3374	1	1	518.888	1553.64	3	1553.65	-0.0038	387	399	0	33.51	27	42	0.36	K	DDPHACYSTVFDK	L				12	110328_WaxPromix10ulA10_NH4OH80ACN.3796.3796.3.dta
1					3375	1	1	518.888	1553.64	3	1553.65	-0.0026	387	399	0	29.19	27	41	0.95	K	DDPHACYSTVFDK	L				7	110328_WaxPromix10ulA10_NH4OH80ACN.3702.3702.3.dta
1					3376	1	1	518.888	1553.64	3	1553.65	-0.0022	387	399	0	20.16	24	42	7.9	K	DDPHACYSTVFDK	L				11	110328_WaxPromix10ulA10_NH4OH80ACN.3987.3987.3.dta
1					3377	1	1	777.829	1553.64	2	1553.65	-0.0019	387	399	0	61.3	32	41	0.00057	K	DDPHACYSTVFDK	L				10	110328_WaxPromix10ulA10_NH4OH80ACN.3759.3759.2.dta
1					3379	1	1	777.829	1553.64	2	1553.65	-0.0017	387	399	0	44.49	29	41	0.027	K	DDPHACYSTVFDK	L				8	110328_WaxPromix10ulA10_NH4OH80ACN.3855.3855.2.dta
1					3380	1	1	518.889	1553.64	3	1553.65	-0.0012	387	399	0	21.51	29	41	5.3	K	DDPHACYSTVFDK	L				6	110328_WaxPromix10ulA10_NH4OH80ACN.4086.4086.3.dta
1					3381	1	1	518.889	1553.64	3	1553.65	-0.0012	387	399	0	32.54	31	41	0.42	K	DDPHACYSTVFDK	L				7	110328_WaxPromix10ulA10_NH4OH80ACN.3891.3891.3.dta
1					3384	1	1	518.889	1553.65	3	1553.65	-0.0001	387	399	0	28.7	27	41	1.1	K	DDPHACYSTVFDK	L				7	110328_WaxPromix10ulA10_NH4OH80ACN.3842.3842.3.dta
1					3385	1	1	777.83	1553.65	2	1553.65	0.0002	387	399	0	48.66	30	42	0.011	K	DDPHACYSTVFDK	L				9	110328_WaxPromix10ulA10_NH4OH80ACN.3713.3713.2.dta
1					3386	1	1	777.83	1553.65	2	1553.65	0.0004	387	399	0	59.82	31	42	0.00083	K	DDPHACYSTVFDK	L				10	110328_WaxPromix10ulA10_NH4OH80ACN.3807.3807.2.dta
1					3387	1	1	518.89	1553.65	3	1553.65	0.0014	387	399	0	22.88	26	41	4	K	DDPHACYSTVFDK	L				12	110328_WaxPromix10ulA10_NH4OH80ACN.3665.3665.3.dta
1					3388	1	1	777.832	1553.65	2	1553.65	0.0032	387	399	0	25.55	26	42	2.3	K	DDPHACYSTVFDK	L				15	110328_WaxPromix10ulA10_NH4OH80ACN.3671.3671.2.dta
1					3466	1	1	784.376	1566.74	2	1566.74	0.0011	347	359	0	82.89	30	43	5.9e-06	K	DAFLGSFLYEYSR	R				18	110328_WaxPromix10ulA10_NH4OH80ACN.2523.2523.2.dta
1					3499	1	1	526.259	1575.75	3	1575.76	-0.0056	139	151	0	29.56	29	43	1.3	K	LKPDPNTLCDEFK	A				13	110328_WaxPromix10ulA10_NH4OH80ACN.2786.2786.3.dta
1					3500	1	1	526.259	1575.76	3	1575.76	-0.0052	139	151	0	41.92	29	43	0.074	K	LKPDPNTLCDEFK	A				17	110328_WaxPromix10ulA10_NH4OH80ACN.2731.2731.3.dta
1					3502	1	1	526.26	1575.76	3	1575.76	-0.0013	139	151	0	33.51	33	43	0.49	K	LKPDPNTLCDEFK	A				13	110328_WaxPromix10ulA10_NH4OH80ACN.2842.2842.3.dta
1					3503	1	1	526.26	1575.76	3	1575.76	-0.0012	139	151	0	29.29	28	43	1.3	K	LKPDPNTLCDEFK	A				14	110328_WaxPromix10ulA10_NH4OH80ACN.2896.2896.3.dta
1					3504	1	1	788.887	1575.76	2	1575.76	-0.0006	139	151	0	52.33	28	43	0.0065	K	LKPDPNTLCDEFK	A				9	110328_WaxPromix10ulA10_NH4OH80ACN.2753.2753.2.dta
1					3505	1	1	526.26	1575.76	3	1575.76	-0.0005	139	151	0	32.26	26	43	0.66	K	LKPDPNTLCDEFK	A				14	110328_WaxPromix10ulA10_NH4OH80ACN.2679.2679.3.dta
1					3506	1	1	526.261	1575.76	3	1575.76	-0.0003	139	151	0	28.03	26	43	1.8	K	LKPDPNTLCDEFK	A				14	110328_WaxPromix10ulA10_NH4OH80ACN.3036.3036.3.dta
1					3508	1	1	526.261	1575.76	3	1575.76	0.0003	139	151	0	22.35	25	43	6.7	K	LKPDPNTLCDEFK	A				10	110328_WaxPromix10ulA10_NH4OH80ACN.3080.3080.3.dta
1					3509	1	1	526.261	1575.76	3	1575.76	0.0005	139	151	0	31.96	27	43	0.71	K	LKPDPNTLCDEFK	A				14	110328_WaxPromix10ulA10_NH4OH80ACN.2942.2942.3.dta
1					3510	1	1	788.888	1575.76	2	1575.76	0.0009	139	151	0	33.64	36	43	0.47	K	LKPDPNTLCDEFK	A				10	110328_WaxPromix10ulA10_NH4OH80ACN.2703.2703.2.dta
1					3511	1	1	788.888	1575.76	2	1575.76	0.0009	139	151	0	55.44	31	43	0.0031	K	LKPDPNTLCDEFK	A				10	110328_WaxPromix10ulA10_NH4OH80ACN.2809.2809.2.dta
1					3512	1	1	526.261	1575.76	3	1575.76	0.0009	139	151	0	21.8	24	43	7.2	K	LKPDPNTLCDEFK	A				12	110328_WaxPromix10ulA10_NH4OH80ACN.2991.2991.3.dta
1					3513	1	1	788.89	1575.77	2	1575.76	0.0052	139	151	0	44.15	26	43	0.041	K	LKPDPNTLCDEFK	A				15	110328_WaxPromix10ulA10_NH4OH80ACN.2948.2948.2.dta
1					3515	1	1	526.588	1576.74	3	1576.74	-0.0007	139	151	0	30.44	32	43	1	K	LKPDPNTLCDEFK	A		Deamidated (NQ)	0.0000040000000.0	9	110328_WaxPromix10ulA10_NH4OH80ACN.3785.3785.3.dta
1					3516	1	1	526.589	1576.74	3	1576.74	-0.0004	139	151	0	22.47	32	43	6.2	K	LKPDPNTLCDEFK	A		Deamidated (NQ)	0.0000040000000.0	12	110328_WaxPromix10ulA10_NH4OH80ACN.3361.3361.3.dta
1					3517	1	1	526.589	1576.74	3	1576.74	0.0006	139	151	0	24.92	24	43	3.6	K	LKPDPNTLCDEFK	A		Deamidated (NQ)	0.0000040000000.0	13	110328_WaxPromix10ulA10_NH4OH80ACN.3695.3695.3.dta
1					3518	1	1	526.589	1576.74	3	1576.74	0.0006	139	151	0	34.33	40	43	0.41	K	LKPDPNTLCDEFK	A		Deamidated (NQ)	0.0000040000000.0	13	110328_WaxPromix10ulA10_NH4OH80ACN.3736.3736.3.dta
1					3519	1	1	526.59	1576.75	3	1576.74	0.0027	139	151	0	27.55	28	43	2	K	LKPDPNTLCDEFK	A		Deamidated (NQ)	0.0000040000000.0	9	110328_WaxPromix10ulA10_NH4OH80ACN.3833.3833.3.dta
1					3681	1	1	547.315	1638.92	3	1638.93	-0.0074	437	451	1	61.89	29	37	0.00017	R	KVPQVSTPTLVEVSR	S				17	110328_WaxPromix10ulA10_NH4OH80ACN.1815.1815.3.dta
1					3682	1	1	547.315	1638.92	3	1638.93	-0.0062	437	451	1	71.15	33	37	1.9e-05	R	KVPQVSTPTLVEVSR	S				16	110328_WaxPromix10ulA10_NH4OH80ACN.1870.1870.3.dta
1					3683	1	1	547.316	1638.93	3	1638.93	-0.0034	437	451	1	68.78	29	37	3.3e-05	R	KVPQVSTPTLVEVSR	S				11	110328_WaxPromix10ulA10_NH4OH80ACN.1925.1925.3.dta
1					3684	1	1	547.316	1638.93	3	1638.93	-0.003	437	451	1	63.51	29	36	0.00011	R	KVPQVSTPTLVEVSR	S				11	110328_WaxPromix10ulA10_NH4OH80ACN.2030.2030.3.dta
1					3685	1	1	820.471	1638.93	2	1638.93	-0.0023	437	451	1	82.32	25	36	1.4e-06	R	KVPQVSTPTLVEVSR	S				12	110328_WaxPromix10ulA10_NH4OH80ACN.1781.1781.2.dta
1					3686	1	1	547.317	1638.93	3	1638.93	-0.0022	437	451	1	34.17	18	36	0.093	R	KVPQVSTPTLVEVSR	S				8	110328_WaxPromix10ulA10_NH4OH80ACN.2196.2196.3.dta
1					3688	1	1	820.471	1638.93	2	1638.93	-0.002	437	451	1	84.02	26	37	1e-06	R	KVPQVSTPTLVEVSR	S				9	110328_WaxPromix10ulA10_NH4OH80ACN.1837.1837.2.dta
1					3689	1	1	547.317	1638.93	3	1638.93	-0.0015	437	451	1	56.97	34	36	0.00048	R	KVPQVSTPTLVEVSR	S				10	110328_WaxPromix10ulA10_NH4OH80ACN.2085.2085.3.dta
1					3690	1	1	547.317	1638.93	3	1638.93	-0.0009	437	451	1	63.43	28	36	0.00011	R	KVPQVSTPTLVEVSR	S				11	110328_WaxPromix10ulA10_NH4OH80ACN.2315.2315.3.dta
1					3691	1	1	820.472	1638.93	2	1638.93	-0.0007	437	451	1	96.51	27	36	5.3e-08	R	KVPQVSTPTLVEVSR	S				12	110328_WaxPromix10ulA10_NH4OH80ACN.1892.1892.2.dta
1					3692	1	1	547.317	1638.93	3	1638.93	-0.0006	437	451	1	59.18	27	36	0.00026	R	KVPQVSTPTLVEVSR	S				11	110328_WaxPromix10ulA10_NH4OH80ACN.2251.2251.3.dta
1					3693	1	1	820.472	1638.93	2	1638.93	-0.0002	437	451	1	70.68	23	36	2e-05	R	KVPQVSTPTLVEVSR	S				9	110328_WaxPromix10ulA10_NH4OH80ACN.2062.2062.2.dta
1					3694	1	1	547.317	1638.93	3	1638.93	0.0001	437	451	1	48.03	26	36	0.0036	R	KVPQVSTPTLVEVSR	S				10	110328_WaxPromix10ulA10_NH4OH80ACN.2141.2141.3.dta
1					3695	1	1	547.317	1638.93	3	1638.93	0.0001	437	451	1	38.17	27	36	0.034	R	KVPQVSTPTLVEVSR	S				16	110328_WaxPromix10ulA10_NH4OH80ACN.2432.2432.3.dta
1					3696	1	1	820.473	1638.93	2	1638.93	0.0003	437	451	1	79.13	23	36	2.7e-06	R	KVPQVSTPTLVEVSR	S				9	110328_WaxPromix10ulA10_NH4OH80ACN.2122.2122.2.dta
1					3697	1	1	547.318	1638.93	3	1638.93	0.001	437	451	1	46.68	24	36	0.0047	R	KVPQVSTPTLVEVSR	S				14	110328_WaxPromix10ulA10_NH4OH80ACN.2377.2377.3.dta
1					3698	1	1	547.318	1638.93	3	1638.93	0.0011	437	451	1	65.48		36	6.6e-05	R	KVPQVSTPTLVEVSR	S				18	110328_WaxPromix10ulA10_NH4OH80ACN.1759.1759.3.dta
1					3699	1	1	820.473	1638.93	2	1638.93	0.0017	437	451	1	96.41	26	36	5.5e-08	R	KVPQVSTPTLVEVSR	S				10	110328_WaxPromix10ulA10_NH4OH80ACN.1948.1948.2.dta
1					3700	1	1	547.318	1638.93	3	1638.93	0.0017	437	451	1	53.37	29	36	0.0011	R	KVPQVSTPTLVEVSR	S				16	110328_WaxPromix10ulA10_NH4OH80ACN.1704.1704.3.dta
1					3701	1	1	820.473	1638.93	2	1638.93	0.0019	437	451	1	83.25	29	36	1.1e-06	R	KVPQVSTPTLVEVSR	S				12	110328_WaxPromix10ulA10_NH4OH80ACN.2008.2008.2.dta
1					3702	1	1	820.474	1638.93	2	1638.93	0.0032	437	451	1	88.63	26	36	3.2e-07	R	KVPQVSTPTLVEVSR	S				9	110328_WaxPromix10ulA10_NH4OH80ACN.1727.1727.2.dta
1					3830	1	1	862.918	1723.82	2	1723.83	-0.0048	469	482	0	80.37		44	1.2e-05	R	MPCTEDYLSLILNR	L				10	110328_WaxPromix10ulA10_NH4OH80ACN.2257.2257.2.dta
1					3831	2	1	575.615	1723.82	3	1723.83	-0.0027	469	482	0	24.16	38	44	4.9	R	MPCTEDYLSLILNR	L				9	110328_WaxPromix10ulA10_NH4OH80ACN.2421.2421.3.dta
1					3832	1	1	575.616	1723.83	3	1723.83	-0.0021	469	482	0	45.64		44	0.037	R	MPCTEDYLSLILNR	L				9	110328_WaxPromix10ulA10_NH4OH80ACN.2268.2268.3.dta
1					3833	1	1	575.616	1723.83	3	1723.83	-0.002	469	482	0	42.05		44	0.082	R	MPCTEDYLSLILNR	L				11	110328_WaxPromix10ulA10_NH4OH80ACN.2220.2220.3.dta
1					3834	1	1	862.921	1723.83	2	1723.83	0.0009	469	482	0	94.72		44	4.5e-07	R	MPCTEDYLSLILNR	L				12	110328_WaxPromix10ulA10_NH4OH80ACN.2426.2426.2.dta
1					3835	1	1	862.923	1723.83	2	1723.83	0.0033	469	482	0	85.05	41	44	4.2e-06	R	MPCTEDYLSLILNR	L				12	110328_WaxPromix10ulA10_NH4OH80ACN.2369.2369.2.dta
1					3836	1	1	862.923	1723.83	2	1723.83	0.0034	469	482	0	79.86	37	44	1.4e-05	R	MPCTEDYLSLILNR	L				10	110328_WaxPromix10ulA10_NH4OH80ACN.2313.2313.2.dta
1					3837	1	1	862.923	1723.83	2	1723.83	0.0041	469	482	0	101.26		44	9.6e-08	R	MPCTEDYLSLILNR	L				11	110328_WaxPromix10ulA10_NH4OH80ACN.2209.2209.2.dta
1					3884	1	1	874.355	1746.7	2	1746.7	-0.0027	184	197	0	33.1	23	41	0.38	K	YNGVFQECCQAEDK	G				10	110328_WaxPromix10ulA10_NH4OH80ACN.4210.4210.2.dta
1					3885	1	1	874.355	1746.7	2	1746.7	-0.0025	184	197	0	83.63	32	41	3.4e-06	K	YNGVFQECCQAEDK	G				12	110328_WaxPromix10ulA10_NH4OH80ACN.3962.3962.2.dta
1					3886	1	1	874.355	1746.7	2	1746.7	-0.0024	184	197	0	82.02	32	41	4.9e-06	K	YNGVFQECCQAEDK	G				11	110328_WaxPromix10ulA10_NH4OH80ACN.4008.4008.2.dta
1					3887	1	1	874.355	1746.7	2	1746.7	-0.0024	184	197	0	95.03	31	41	2.4e-07	K	YNGVFQECCQAEDK	G				11	110328_WaxPromix10ulA10_NH4OH80ACN.4053.4053.2.dta
1					3888	1	1	583.24	1746.7	3	1746.7	-0.0012	184	197	0	37.52	28	41	0.14	K	YNGVFQECCQAEDK	G				15	110328_WaxPromix10ulA10_NH4OH80ACN.4021.4021.3.dta
1					3889	1	1	583.24	1746.7	3	1746.7	-0.0001	184	197	0	32.1	28	42	0.49	K	YNGVFQECCQAEDK	G				18	110328_WaxPromix10ulA10_NH4OH80ACN.3975.3975.3.dta
1					3890	1	1	874.356	1746.7	2	1746.7	0.0002	184	197	0	85.24	30	42	2.4e-06	K	YNGVFQECCQAEDK	G				12	110328_WaxPromix10ulA10_NH4OH80ACN.3914.3914.2.dta
1					3892	1	1	874.356	1746.7	2	1746.7	0.0005	184	197	0	73.04	30	42	4e-05	K	YNGVFQECCQAEDK	G				12	110328_WaxPromix10ulA10_NH4OH80ACN.4101.4101.2.dta
1					3893	1	1	583.24	1746.7	3	1746.7	0.0006	184	197	0	20.66	22	42	6.9	K	YNGVFQECCQAEDK	G				10	110328_WaxPromix10ulA10_NH4OH80ACN.3931.3931.3.dta
1					3894	1	1	874.357	1746.7	2	1746.7	0.0022	184	197	0	62.35	32	42	0.00046	K	YNGVFQECCQAEDK	G				12	110328_WaxPromix10ulA10_NH4OH80ACN.4154.4154.2.dta
1					3895	1	1	874.357	1746.7	2	1746.7	0.0026	184	197	0	49.55	26	42	0.009	K	YNGVFQECCQAEDK	G				15	110328_WaxPromix10ulA10_NH4OH80ACN.4269.4269.2.dta
1					3896	1	1	874.357	1746.7	2	1746.7	0.0026	184	197	0	70.04	33	42	8.1e-05	K	YNGVFQECCQAEDK	G				10	110328_WaxPromix10ulA10_NH4OH80ACN.3875.3875.2.dta
1					3898	1	1	874.848	1747.68	2	1747.68	-0.0002	184	197	0	42	24	41	0.042	K	YNGVFQECCQAEDK	G		Deamidated (NQ)	0.00000400000000.0	12	110328_WaxPromix10ulA10_NH4OH80ACN.6290.6290.2.dta
1					3899	1	1	874.848	1747.68	2	1747.68	0.0003	184	197	0	74.43	32	41	2.5e-05	K	YNGVFQECCQAEDK	G		Deamidated (NQ)	0.04000000000000.0	11	110328_WaxPromix10ulA10_NH4OH80ACN.6102.6102.2.dta
1					3900	1	1	874.849	1747.68	2	1747.68	0.0011	184	197	0	73.09	31	41	3.3e-05	K	YNGVFQECCQAEDK	G		Deamidated (NQ)	0.04000000000000.0	12	110328_WaxPromix10ulA10_NH4OH80ACN.5298.5298.2.dta
1					3901	1	1	874.849	1747.68	2	1747.68	0.0021	184	197	0	91.56	26	41	4.8e-07	K	YNGVFQECCQAEDK	G		Deamidated (NQ)	0.04000000000000.0	12	110328_WaxPromix10ulA10_NH4OH80ACN.6151.6151.2.dta
1					3902	1	1	874.849	1747.68	2	1747.68	0.0021	184	197	0	61.23	30	41	0.00051	K	YNGVFQECCQAEDK	G		Deamidated (NQ)	0.04000000000000.0	12	110328_WaxPromix10ulA10_NH4OH80ACN.6388.6388.2.dta
1					3904	1	1	874.85	1747.68	2	1747.68	0.0028	184	197	0	60.94	26	41	0.00058	K	YNGVFQECCQAEDK	G		Deamidated (NQ)	0.04000000000000.0	12	110328_WaxPromix10ulA10_NH4OH80ACN.6197.6197.2.dta
1					3905	1	1	874.85	1747.68	2	1747.68	0.0032	184	197	0	40.91	22	41	0.058	K	YNGVFQECCQAEDK	G		Deamidated (NQ)	0.00000400000000.0	11	110328_WaxPromix10ulA10_NH4OH80ACN.6433.6433.2.dta
1					3906	1	1	874.85	1747.68	2	1747.68	0.0033	184	197	0	70.16	28	41	6.9e-05	K	YNGVFQECCQAEDK	G		Deamidated (NQ)	0.04000000000000.0	10	110328_WaxPromix10ulA10_NH4OH80ACN.6052.6052.2.dta
1					3907	1	1	874.85	1747.69	2	1747.68	0.0033	184	197	0	65.69	23	41	0.00019	K	YNGVFQECCQAEDK	G		Deamidated (NQ)	0.04000000000000.0	11	110328_WaxPromix10ulA10_NH4OH80ACN.6342.6342.2.dta
1					3908	1	1	874.85	1747.69	2	1747.68	0.0036	184	197	0	68.87	29	41	9.3e-05	K	YNGVFQECCQAEDK	G		Deamidated (NQ)	0.04000000000000.0	11	110328_WaxPromix10ulA10_NH4OH80ACN.6001.6001.2.dta
1					3909	1	1	874.85	1747.69	2	1747.68	0.0037	184	197	0	72.08	27	41	4.5e-05	K	YNGVFQECCQAEDK	G		Deamidated (NQ)	0.04000000000000.0	12	110328_WaxPromix10ulA10_NH4OH80ACN.6244.6244.2.dta
1					3910	1	1	874.85	1747.69	2	1747.68	0.0037	184	197	0	66.05	25	41	0.00018	K	YNGVFQECCQAEDK	G		Deamidated (NQ)	0.04000000000000.0	12	110328_WaxPromix10ulA10_NH4OH80ACN.5344.5344.2.dta
1					3911	1	1	874.85	1747.69	2	1747.68	0.0037	184	197	0	44.3	25	41	0.026	K	YNGVFQECCQAEDK	G		Deamidated (NQ)	0.04000000000000.0	12	110328_WaxPromix10ulA10_NH4OH80ACN.5395.5395.2.dta
1					3912	1	1	874.851	1747.69	2	1747.68	0.0052	184	197	0	38.27	22	41	0.11	K	YNGVFQECCQAEDK	G		Deamidated (NQ)	0.00000400000000.0	11	110328_WaxPromix10ulA10_NH4OH80ACN.6302.6302.2.dta
1					3913	1	1	874.851	1747.69	2	1747.68	0.0056	184	197	0	55.37	33	41	0.0021	K	YNGVFQECCQAEDK	G		Deamidated (NQ)	0.04000000000000.0	20	110328_WaxPromix10ulA10_NH4OH80ACN.5259.5259.2.dta
1					3914	1	1	874.851	1747.69	2	1747.68	0.0057	184	197	0	43.18	25	41	0.034	K	YNGVFQECCQAEDK	G		Deamidated (NQ)	0.00000400000000.0	11	110328_WaxPromix10ulA10_NH4OH80ACN.5954.5954.2.dta
1					3915	1	1	874.852	1747.69	2	1747.68	0.0073	184	197	0	58.82	32	41	0.00094	K	YNGVFQECCQAEDK	G		Deamidated (NQ)	0.04000000000000.0	12	110328_WaxPromix10ulA10_NH4OH80ACN.5246.5246.2.dta
1					3917	1	1	583.89	1748.65	3	1748.66	-0.0078	267	280	0	53.44	35	39	0.0023	K	ECCHGDLLECADDR	A				7	110328_WaxPromix10ulA10_NH4OH80ACN.5592.5592.3.dta
1					3918	1	1	583.89	1748.65	3	1748.66	-0.0077	267	280	0	42.3	31	40	0.03	K	ECCHGDLLECADDR	A				7	110328_WaxPromix10ulA10_NH4OH80ACN.5544.5544.3.dta
1					3919	1	1	583.89	1748.65	3	1748.66	-0.0074	267	280	0	39.09	35	39	0.061	K	ECCHGDLLECADDR	A				5	110328_WaxPromix10ulA10_NH4OH80ACN.5493.5493.3.dta
1					3920	1	1	583.89	1748.65	3	1748.66	-0.0061	267	280	0	50.07	31	40	0.0052	K	ECCHGDLLECADDR	A				8	110328_WaxPromix10ulA10_NH4OH80ACN.5642.5642.3.dta
1					3921	1	1	583.89	1748.65	3	1748.66	-0.006	267	280	0	56.35	35	40	0.0012	K	ECCHGDLLECADDR	A				7	110328_WaxPromix10ulA10_NH4OH80ACN.5443.5443.3.dta
1					3922	1	1	583.891	1748.65	3	1748.66	-0.004	267	280	0	30.46	26	40	0.47	K	ECCHGDLLECADDR	A				14	110328_WaxPromix10ulA10_NH4OH80ACN.6703.6703.3.dta
1					3923	1	1	583.891	1748.65	3	1748.66	-0.0035	267	280	0	46.87	32	40	0.011	K	ECCHGDLLECADDR	A				7	110328_WaxPromix10ulA10_NH4OH80ACN.5689.5689.3.dta
1					3924	1	1	583.891	1748.65	3	1748.66	-0.0033	267	280	0	24.5	28	40	1.8	K	ECCHGDLLECADDR	A				7	110328_WaxPromix10ulA10_NH4OH80ACN.6767.6767.3.dta
1					3925	1	1	583.891	1748.65	3	1748.66	-0.0028	267	280	0	24.34	24	40	2	K	ECCHGDLLECADDR	A				5	110328_WaxPromix10ulA10_NH4OH80ACN.6822.6822.3.dta
1					3926	1	1	583.891	1748.65	3	1748.66	-0.0026	267	280	0	23.59	26	40	2.3	K	ECCHGDLLECADDR	A				5	110328_WaxPromix10ulA10_NH4OH80ACN.6499.6499.3.dta
1					3928	1	1	583.892	1748.65	3	1748.66	-0.0018	267	280	0	48.59	32	40	0.0073	K	ECCHGDLLECADDR	A				8	110328_WaxPromix10ulA10_NH4OH80ACN.6185.6185.3.dta
1					3929	1	1	583.892	1748.65	3	1748.66	-0.0013	267	280	0	36.36	28	40	0.12	K	ECCHGDLLECADDR	A				7	110328_WaxPromix10ulA10_NH4OH80ACN.5394.5394.3.dta
1					3930	1	1	583.892	1748.65	3	1748.66	-0.001	267	280	0	42.49	32	40	0.03	K	ECCHGDLLECADDR	A				8	110328_WaxPromix10ulA10_NH4OH80ACN.5734.5734.3.dta
1					3931	1	1	583.892	1748.65	3	1748.66	-0.0009	267	280	0	53.62	35	40	0.0023	K	ECCHGDLLECADDR	A				7	110328_WaxPromix10ulA10_NH4OH80ACN.5783.5783.3.dta
1					3932	1	1	583.892	1748.65	3	1748.66	-0.0009	267	280	0	32.62	27	40	0.29	K	ECCHGDLLECADDR	A				8	110328_WaxPromix10ulA10_NH4OH80ACN.6325.6325.3.dta
1					3933	1	1	583.892	1748.65	3	1748.66	-0.0008	267	280	0	22.18	25	40	3.2	K	ECCHGDLLECADDR	A				8	110328_WaxPromix10ulA10_NH4OH80ACN.6140.6140.3.dta
1					3934	1	1	583.892	1748.65	3	1748.66	-0.0005	267	280	0	40.92	28	40	0.044	K	ECCHGDLLECADDR	A				7	110328_WaxPromix10ulA10_NH4OH80ACN.5877.5877.3.dta
1					3935	1	1	583.892	1748.65	3	1748.66	-0.0004	267	280	0	39.67	30	40	0.058	K	ECCHGDLLECADDR	A				8	110328_WaxPromix10ulA10_NH4OH80ACN.6231.6231.3.dta
1					3936	1	1	583.892	1748.65	3	1748.66	-0.0003	267	280	0	33.88	28	40	0.21	K	ECCHGDLLECADDR	A				7	110328_WaxPromix10ulA10_NH4OH80ACN.5831.5831.3.dta
1					3937	1	1	583.892	1748.66	3	1748.66	-0.0001	267	280	0	34.16	27	40	0.2	K	ECCHGDLLECADDR	A				7	110328_WaxPromix10ulA10_NH4OH80ACN.5975.5975.3.dta
1					3938	1	1	583.892	1748.66	3	1748.66	0	267	280	0	47.57	28	40	0.009	K	ECCHGDLLECADDR	A				8	110328_WaxPromix10ulA10_NH4OH80ACN.6275.6275.3.dta
1					3939	1	1	875.335	1748.66	2	1748.66	0.0002	267	280	0	73.39	27	40	2.4e-05	K	ECCHGDLLECADDR	A				8	110328_WaxPromix10ulA10_NH4OH80ACN.5568.5568.2.dta
1					3940	1	1	583.892	1748.66	3	1748.66	0.0002	267	280	0	29.46	23	40	0.58	K	ECCHGDLLECADDR	A				6	110328_WaxPromix10ulA10_NH4OH80ACN.6652.6652.3.dta
1					3941	1	1	583.893	1748.66	3	1748.66	0.0003	267	280	0	32.6	30	40	0.28	K	ECCHGDLLECADDR	A				7	110328_WaxPromix10ulA10_NH4OH80ACN.6422.6422.3.dta
1					3942	1	1	875.335	1748.66	2	1748.66	0.0006	267	280	0	61.82	26	40	0.00035	K	ECCHGDLLECADDR	A				9	110328_WaxPromix10ulA10_NH4OH80ACN.5519.5519.2.dta
1					3943	1	1	583.893	1748.66	3	1748.66	0.0007	267	280	0	24.67	26	40	1.8	K	ECCHGDLLECADDR	A				18	110328_WaxPromix10ulA10_NH4OH80ACN.6479.6479.3.dta
1					3944	1	1	583.893	1748.66	3	1748.66	0.0008	267	280	0	23.99	26	40	2.1	K	ECCHGDLLECADDR	A				5	110328_WaxPromix10ulA10_NH4OH80ACN.5926.5926.3.dta
1					3945	1	1	875.335	1748.66	2	1748.66	0.0009	267	280	0	69.04	28	40	6.5e-05	K	ECCHGDLLECADDR	A				8	110328_WaxPromix10ulA10_NH4OH80ACN.5616.5616.2.dta
1					3946	1	1	583.893	1748.66	3	1748.66	0.0016	267	280	0	38.84	26	40	0.073	K	ECCHGDLLECADDR	A				8	110328_WaxPromix10ulA10_NH4OH80ACN.6374.6374.3.dta
1					3947	1	1	875.336	1748.66	2	1748.66	0.0019	267	280	0	68.43	28	40	8.1e-05	K	ECCHGDLLECADDR	A				8	110328_WaxPromix10ulA10_NH4OH80ACN.5711.5711.2.dta
1					3948	1	1	875.336	1748.66	2	1748.66	0.0019	267	280	0	72.65	31	40	3e-05	K	ECCHGDLLECADDR	A				8	110328_WaxPromix10ulA10_NH4OH80ACN.5466.5466.2.dta
1					3949	1	1	875.336	1748.66	2	1748.66	0.0024	267	280	0	68.96	27	40	7e-05	K	ECCHGDLLECADDR	A				8	110328_WaxPromix10ulA10_NH4OH80ACN.5664.5664.2.dta
1					3950	1	1	875.336	1748.66	2	1748.66	0.0025	267	280	0	36.82	29	40	0.11	K	ECCHGDLLECADDR	A				9	110328_WaxPromix10ulA10_NH4OH80ACN.5418.5418.2.dta
1					3951	1	1	875.336	1748.66	2	1748.66	0.0027	267	280	0	29.99	22	40	0.55	K	ECCHGDLLECADDR	A				10	110328_WaxPromix10ulA10_NH4OH80ACN.5802.5802.2.dta
1					3952	1	1	583.893	1748.66	3	1748.66	0.0032	267	280	0	30.01	26	40	0.55	K	ECCHGDLLECADDR	A				6	110328_WaxPromix10ulA10_NH4OH80ACN.6033.6033.3.dta
1					3954	1	1	875.338	1748.66	2	1748.66	0.0058	267	280	0	58.29	26	40	0.00085	K	ECCHGDLLECADDR	A				10	110328_WaxPromix10ulA10_NH4OH80ACN.5764.5764.2.dta
1					3955	1	1	875.338	1748.66	2	1748.66	0.0061	267	280	0	31.37	28	40	0.42	K	ECCHGDLLECADDR	A				7	110328_WaxPromix10ulA10_NH4OH80ACN.5886.5886.2.dta
1					3957	1	1	875.35	1748.68	2	1747.68	1.0031	184	197	0	40.07	23	41	0.068	K	YNGVFQECCQAEDK	G		Deamidated (NQ)	0.04000000000000.0	19	110328_WaxPromix10ulA10_NH4OH80ACN.5406.5406.2.dta
1					3958	1	1	875.351	1748.69	2	1747.68	1.006	184	197	0	34.43	21	41	0.26	K	YNGVFQECCQAEDK	G		Deamidated (NQ)	0.04000000000000.0	10	110328_WaxPromix10ulA10_NH4OH80ACN.5946.5946.2.dta
1					3964	1	1	584.227	1749.66	3	1748.66	1.005	267	280	0	40.95	30	40	0.046	K	ECCHGDLLECADDR	A				7	110328_WaxPromix10ulA10_NH4OH80ACN.7023.7023.3.dta
1					4448	1	1	627.643	1879.91	3	1879.91	-0.0058	508	523	0	37.51	36	44	0.25	R	RPCFSALTPDETYVPK	A				9	110328_WaxPromix10ulA10_NH4OH80ACN.2180.2180.3.dta
1					4449	1	1	940.962	1879.91	2	1879.91	-0.0034	508	523	0	22.87	27	44	7.1	R	RPCFSALTPDETYVPK	A				8	110328_WaxPromix10ulA10_NH4OH80ACN.2260.2260.2.dta
1					4450	1	1	627.645	1879.91	3	1879.91	-0.0012	508	523	0	30.78	34	44	1.2	R	RPCFSALTPDETYVPK	A				17	110328_WaxPromix10ulA10_NH4OH80ACN.2348.2348.3.dta
1					4451	1	1	627.645	1879.91	3	1879.91	-0.0007	508	523	0	45.68	33	44	0.038	R	RPCFSALTPDETYVPK	A				10	110328_WaxPromix10ulA10_NH4OH80ACN.2079.2079.3.dta
1					4452	1	1	627.645	1879.91	3	1879.91	0	508	523	0	45.59	35	44	0.038	R	RPCFSALTPDETYVPK	A				10	110328_WaxPromix10ulA10_NH4OH80ACN.2294.2294.3.dta
1					4453	1	1	627.645	1879.91	3	1879.91	0.0001	508	523	0	40.96	29	44	0.11	R	RPCFSALTPDETYVPK	A				10	110328_WaxPromix10ulA10_NH4OH80ACN.2235.2235.3.dta
1					4454	1	1	627.645	1879.91	3	1879.91	0.0006	508	523	0	23.03	27	44	6.9	R	RPCFSALTPDETYVPK	A				9	110328_WaxPromix10ulA10_NH4OH80ACN.2404.2404.3.dta
1					4455	1	1	940.965	1879.91	2	1879.91	0.0007	508	523	0	27.55	27	44	2.4	R	RPCFSALTPDETYVPK	A				13	110328_WaxPromix10ulA10_NH4OH80ACN.2192.2192.2.dta
1					4456	1	1	627.646	1879.92	3	1879.91	0.0023	508	523	0	42.88	34	44	0.071	R	RPCFSALTPDETYVPK	A				10	110328_WaxPromix10ulA10_NH4OH80ACN.2125.2125.3.dta
1					4457	1	1	940.966	1879.92	2	1879.91	0.0037	508	523	0	45.54	39	44	0.039	R	RPCFSALTPDETYVPK	A				11	110328_WaxPromix10ulA10_NH4OH80ACN.2143.2143.2.dta
1					4486	1	1	634.628	1900.86	3	1900.86	-0.0012	123	138	1	24.87	32	44	4.8	R	NECFLSHKDDSPDLPK	L				15	110328_WaxPromix10ulA10_NH4OH80ACN.3185.3185.3.dta
1					4493	1	1	634.628	1900.86	3	1900.86	0.0003	123	138	1	32.3	37	44	0.87	R	NECFLSHKDDSPDLPK	L				10	110328_WaxPromix10ulA10_NH4OH80ACN.3097.3097.3.dta
1					4495	1	1	951.439	1900.86	2	1900.86	0.0006	123	138	1	37.46	25	44	0.26	R	NECFLSHKDDSPDLPK	L				12	110328_WaxPromix10ulA10_NH4OH80ACN.3127.3127.2.dta
1					4496	1	1	634.628	1900.86	3	1900.86	0.0008	123	138	1	23.9	28	44	6	R	NECFLSHKDDSPDLPK	L				12	110328_WaxPromix10ulA10_NH4OH80ACN.3275.3275.3.dta
1					4497	1	1	634.628	1900.86	3	1900.86	0.0009	123	138	1	28.03	31	44	2.3	R	NECFLSHKDDSPDLPK	L				19	110328_WaxPromix10ulA10_NH4OH80ACN.3055.3055.3.dta
1					4500	1	1	951.441	1900.87	2	1900.86	0.0047	123	138	1	63.11	25	44	0.00073	R	NECFLSHKDDSPDLPK	L				11	110328_WaxPromix10ulA10_NH4OH80ACN.3083.3083.2.dta
1					4510	1	1	634.956	1901.85	3	1901.85	-0.001	123	138	1	33.35	31	44	0.67	R	NECFLSHKDDSPDLPK	L		Deamidated (NQ)	0.4000000000000000.0	12	110328_WaxPromix10ulA10_NH4OH80ACN.4160.4160.3.dta
1					4530	1	1	636.643	1906.91	3	1906.91	-0.0052	529	544	0	32.18	39	44	0.93	K	LFTFHADICTLPDTEK	Q				16	110328_WaxPromix10ulA10_NH4OH80ACN.2532.2532.3.dta
1					4531	1	1	636.644	1906.91	3	1906.91	-0.0038	529	544	0	33.91	36	44	0.62	K	LFTFHADICTLPDTEK	Q				14	110328_WaxPromix10ulA10_NH4OH80ACN.2587.2587.3.dta
1					4532	1	1	636.644	1906.91	3	1906.91	-0.0032	529	544	0	36.25	34	44	0.36	K	LFTFHADICTLPDTEK	Q				8	110328_WaxPromix10ulA10_NH4OH80ACN.2698.2698.3.dta
1					4533	1	1	636.644	1906.91	3	1906.91	-0.0031	529	544	0	39.77	36	44	0.16	K	LFTFHADICTLPDTEK	Q				16	110328_WaxPromix10ulA10_NH4OH80ACN.2643.2643.3.dta
1					4535	1	1	636.644	1906.91	3	1906.91	-0.0018	529	544	0	42.86	33	44	0.079	K	LFTFHADICTLPDTEK	Q				18	110328_WaxPromix10ulA10_NH4OH80ACN.2863.2863.3.dta
1					4536	1	1	636.645	1906.91	3	1906.91	-0.0009	529	544	0	34.88	37	44	0.5	K	LFTFHADICTLPDTEK	Q				16	110328_WaxPromix10ulA10_NH4OH80ACN.2808.2808.3.dta
1					4537	1	1	636.645	1906.91	3	1906.91	-0.0006	529	544	0	25.17	34	44	4.6	K	LFTFHADICTLPDTEK	Q				6	110328_WaxPromix10ulA10_NH4OH80ACN.3356.3356.3.dta
1					4538	1	1	636.645	1906.91	3	1906.91	-0.0005	529	544	0	31.52	30	44	1.1	K	LFTFHADICTLPDTEK	Q				8	110328_WaxPromix10ulA10_NH4OH80ACN.2754.2754.3.dta
1					4539	1	1	636.645	1906.91	3	1906.91	-0.0004	529	544	0	29.63	36	44	1.7	K	LFTFHADICTLPDTEK	Q				12	110328_WaxPromix10ulA10_NH4OH80ACN.3053.3053.3.dta
1					4541	1	1	636.645	1906.91	3	1906.91	-0.0002	529	544	0	37.02	43	44	0.3	K	LFTFHADICTLPDTEK	Q				12	110328_WaxPromix10ulA10_NH4OH80ACN.2919.2919.3.dta
1					4542	2	1	636.645	1906.91	3	1906.91	0	529	544	0	20.58	34	44	13	K	LFTFHADICTLPDTEK	Q				11	110328_WaxPromix10ulA10_NH4OH80ACN.3311.3311.3.dta
1					4543	1	1	636.645	1906.91	3	1906.91	0	529	544	0	37.33	39	44	0.28	K	LFTFHADICTLPDTEK	Q				14	110328_WaxPromix10ulA10_NH4OH80ACN.2963.2963.3.dta
1					4544	1	1	636.645	1906.91	3	1906.91	0.0001	529	544	0	31.88	31	44	0.97	K	LFTFHADICTLPDTEK	Q				12	110328_WaxPromix10ulA10_NH4OH80ACN.3264.3264.3.dta
1					4545	1	1	636.645	1906.91	3	1906.91	0.0004	529	544	0	33.64	31	44	0.65	K	LFTFHADICTLPDTEK	Q				13	110328_WaxPromix10ulA10_NH4OH80ACN.3009.3009.3.dta
1					4551	1	1	636.645	1906.91	3	1906.91	0.0007	529	544	0	26.83	30	44	3.1	K	LFTFHADICTLPDTEK	Q				23	110328_WaxPromix10ulA10_NH4OH80ACN.3174.3174.3.dta
1					4552	1	1	636.645	1906.91	3	1906.91	0.0009	529	544	0	26.02	31	44	3.8	K	LFTFHADICTLPDTEK	Q				15	110328_WaxPromix10ulA10_NH4OH80ACN.3218.3218.3.dta
1					4553	1	1	636.645	1906.91	3	1906.91	0.0012	529	544	0	27.58	32	44	2.6	K	LFTFHADICTLPDTEK	Q				12	110328_WaxPromix10ulA10_NH4OH80ACN.3403.3403.3.dta
1					4555	1	1	954.465	1906.91	2	1906.91	0.0015	529	544	0	54.75	36	44	0.0051	K	LFTFHADICTLPDTEK	Q				19	110328_WaxPromix10ulA10_NH4OH80ACN.2565.2565.2.dta
1					4557	1	1	636.646	1906.92	3	1906.91	0.0018	529	544	0	32.68	35	44	0.81	K	LFTFHADICTLPDTEK	Q				11	110328_WaxPromix10ulA10_NH4OH80ACN.3131.3131.3.dta
1					4558	1	1	636.646	1906.92	3	1906.91	0.0018	529	544	0	22.64	33	44	8.2	K	LFTFHADICTLPDTEK	Q				8	110328_WaxPromix10ulA10_NH4OH80ACN.2482.2482.3.dta
1					4560	1	1	954.465	1906.92	2	1906.91	0.0023	529	544	0	54.93	37	44	0.0048	K	LFTFHADICTLPDTEK	Q				7	110328_WaxPromix10ulA10_NH4OH80ACN.2680.2680.2.dta
1					4561	1	1	954.466	1906.92	2	1906.91	0.0038	529	544	0	44.28	34	44	0.057	K	LFTFHADICTLPDTEK	Q				9	110328_WaxPromix10ulA10_NH4OH80ACN.2772.2772.2.dta
1					4563	1	1	954.467	1906.92	2	1906.91	0.0052	529	544	0	56.44		44	0.0034	K	LFTFHADICTLPDTEK	Q				19	110328_WaxPromix10ulA10_NH4OH80ACN.2622.2622.2.dta
1					4566	1	1	954.467	1906.92	2	1906.91	0.0066	529	544	0	50.2	32	44	0.014	K	LFTFHADICTLPDTEK	Q				16	110328_WaxPromix10ulA10_NH4OH80ACN.2512.2512.2.dta
1					4567	1	1	954.469	1906.92	2	1906.91	0.0095	529	544	0	53.71	31	44	0.0063	K	LFTFHADICTLPDTEK	Q				10	110328_WaxPromix10ulA10_NH4OH80ACN.2734.2734.2.dta
1					4613	1	1	643.27	1926.79	3	1926.79	-0.0034	581	597	1	62.7	36	43	0.0006	K	CCAADDKEACFAVEGPK	L				17	110328_WaxPromix10ulA10_NH4OH80ACN.3376.3376.3.dta
1					4614	1	1	643.27	1926.79	3	1926.79	-0.0026	581	597	1	37.4	25	43	0.2	K	CCAADDKEACFAVEGPK	L				16	110328_WaxPromix10ulA10_NH4OH80ACN.3557.3557.3.dta
1					4615	1	1	643.27	1926.79	3	1926.79	-0.0025	581	597	1	66.75	33	43	0.00023	K	CCAADDKEACFAVEGPK	L				19	110328_WaxPromix10ulA10_NH4OH80ACN.3332.3332.3.dta
1					4617	1	1	643.27	1926.79	3	1926.79	-0.0016	581	597	1	57.75	27	43	0.0019	K	CCAADDKEACFAVEGPK	L				20	110328_WaxPromix10ulA10_NH4OH80ACN.3421.3421.3.dta
1					4618	1	1	964.403	1926.79	2	1926.79	0	581	597	1	79.84	30	43	1.2e-05	K	CCAADDKEACFAVEGPK	L				12	110328_WaxPromix10ulA10_NH4OH80ACN.3354.3354.2.dta
1					4619	1	1	643.271	1926.79	3	1926.79	0.0008	581	597	1	47.35	31	43	0.021	K	CCAADDKEACFAVEGPK	L				20	110328_WaxPromix10ulA10_NH4OH80ACN.3289.3289.3.dta
1					4620	1	1	643.272	1926.79	3	1926.79	0.0023	581	597	1	51.83	29	43	0.0076	K	CCAADDKEACFAVEGPK	L				13	110328_WaxPromix10ulA10_NH4OH80ACN.3509.3509.3.dta
1					4621	1	1	643.272	1926.79	3	1926.79	0.0033	581	597	1	55.75	24	43	0.0029	K	CCAADDKEACFAVEGPK	L				16	110328_WaxPromix10ulA10_NH4OH80ACN.3467.3467.3.dta
1					4622	1	1	964.404	1926.79	2	1926.79	0.0034	581	597	1	80.35	28	43	1e-05	K	CCAADDKEACFAVEGPK	L				24	110328_WaxPromix10ulA10_NH4OH80ACN.3401.3401.2.dta
1					4623	1	1	964.405	1926.79	2	1926.79	0.0039	581	597	1	77.76	29	43	1.9e-05	K	CCAADDKEACFAVEGPK	L				12	110328_WaxPromix10ulA10_NH4OH80ACN.3314.3314.2.dta
1					4679	1	1	652.658	1954.95	3	1954.95	0.0006	319	336	0	53.25	24	44	0.007	K	DAIPENLPPLTADFAEDK	D				19	110328_WaxPromix10ulA10_NH4OH80ACN.6373.6373.3.dta
1					4680	1	1	652.658	1954.95	3	1954.95	0.0007	319	336	0	44.11	29	44	0.057	K	DAIPENLPPLTADFAEDK	D				17	110328_WaxPromix10ulA10_NH4OH80ACN.6276.6276.3.dta
1					4681	1	1	978.484	1954.95	2	1954.95	0.0007	319	336	0	57.99	30	44	0.0023	K	DAIPENLPPLTADFAEDK	D				26	110328_WaxPromix10ulA10_NH4OH80ACN.6361.6361.2.dta
1					4683	1	1	978.484	1954.95	2	1954.95	0.001	319	336	0	50.5	28	44	0.013	K	DAIPENLPPLTADFAEDK	D				13	110328_WaxPromix10ulA10_NH4OH80ACN.6212.6212.2.dta
1					4684	1	1	978.484	1954.95	2	1954.95	0.0013	319	336	0	60.51	32	44	0.0013	K	DAIPENLPPLTADFAEDK	D				21	110328_WaxPromix10ulA10_NH4OH80ACN.6311.6311.2.dta
1					4685	1	1	978.484	1954.95	2	1954.95	0.0019	319	336	0	51.67	33	44	0.0098	K	DAIPENLPPLTADFAEDK	D				17	110328_WaxPromix10ulA10_NH4OH80ACN.6224.6224.2.dta
1					4686	1	1	652.659	1954.95	3	1954.95	0.0019	319	336	0	32.75	26	44	0.77	K	DAIPENLPPLTADFAEDK	D				15	110328_WaxPromix10ulA10_NH4OH80ACN.6419.6419.3.dta
1					4687	1	1	652.659	1954.95	3	1954.95	0.0022	319	336	0	45.07	27	44	0.045	K	DAIPENLPPLTADFAEDK	D				16	110328_WaxPromix10ulA10_NH4OH80ACN.6324.6324.3.dta
1					4688	1	1	978.485	1954.95	2	1954.95	0.0024	319	336	0	57.98	28	44	0.0023	K	DAIPENLPPLTADFAEDK	D				11	110328_WaxPromix10ulA10_NH4OH80ACN.6508.6508.2.dta
1					4689	1	1	978.485	1954.96	2	1954.95	0.0027	319	336	0	51.9	31	44	0.0093	K	DAIPENLPPLTADFAEDK	D				17	110328_WaxPromix10ulA10_NH4OH80ACN.6408.6408.2.dta
1					4692	1	1	978.486	1954.96	2	1954.95	0.0041	319	336	0	57.38	29	44	0.0026	K	DAIPENLPPLTADFAEDK	D				21	110328_WaxPromix10ulA10_NH4OH80ACN.6458.6458.2.dta
1					4693	1	1	978.486	1954.96	2	1954.95	0.0047	319	336	0	56.7	33	44	0.0031	K	DAIPENLPPLTADFAEDK	D				13	110328_WaxPromix10ulA10_NH4OH80ACN.6264.6264.2.dta
1					4694	1	1	978.986	1955.96	2	1954.95	1.0042	319	336	0	38.72	27	44	0.2	K	DAIPENLPPLTADFAEDK	D				9	110328_WaxPromix10ulA10_NH4OH80ACN.6536.6536.2.dta
1					4796	1	1	505.747	2018.96	4	2018.96	-0.0019	139	155	1	25.42	28	45	4.8	K	LKPDPNTLCDEFKADEK	K				10	110328_WaxPromix10ulA10_NH4OH80ACN.3399.3399.4.dta
1					4803	1	1	505.749	2018.97	4	2018.96	0.0051	139	155	1	20.58	29	45	15	K	LKPDPNTLCDEFKADEK	K				9	110328_WaxPromix10ulA10_NH4OH80ACN.3312.3312.4.dta
1					5118	1	1	562.741	2246.94	4	2246.94	0.0007	267	285	1	22.82	32	44	8.2	K	ECCHGDLLECADDRADLAK	Y				9	110328_WaxPromix10ulA10_NH4OH80ACN.4510.4510.4.dta
1					5345	1	1	820.062	2457.16	3	2457.17	-0.0087	319	340	1	38.77	32	46	0.29	K	DAIPENLPPLTADFAEDKDVCK	N				17	110328_WaxPromix10ulA10_NH4OH80ACN.5156.5156.3.dta
1					5346	1	1	820.062	2457.16	3	2457.17	-0.0087	319	340	1	45.06	31	46	0.068	K	DAIPENLPPLTADFAEDKDVCK	N				21	110328_WaxPromix10ulA10_NH4OH80ACN.5110.5110.3.dta
1					5347	1	1	820.063	2457.17	3	2457.17	-0.0063	319	340	1	36.1	40	46	0.53	K	DAIPENLPPLTADFAEDKDVCK	N				18	110328_WaxPromix10ulA10_NH4OH80ACN.5204.5204.3.dta
1					5348	1	1	820.063	2457.17	3	2457.17	-0.0056	319	340	1	23.92	28	46	8.8	K	DAIPENLPPLTADFAEDKDVCK	N				17	110328_WaxPromix10ulA10_NH4OH80ACN.5250.5250.3.dta
1					5351	1	1	820.065	2457.17	3	2457.17	-0.0008	319	340	1	25.86	29	46	5.5	K	DAIPENLPPLTADFAEDKDVCK	N				17	110328_WaxPromix10ulA10_NH4OH80ACN.5065.5065.3.dta
1					5353	1	1	1229.59	2457.17	2	2457.17	0.0007	319	340	1	49.42	29	46	0.024	K	DAIPENLPPLTADFAEDKDVCK	N				22	110328_WaxPromix10ulA10_NH4OH80ACN.5078.5078.2.dta
1					5358	1	1	1229.59	2457.18	2	2457.17	0.0019	319	340	1	61.82	28	46	0.0014	K	DAIPENLPPLTADFAEDKDVCK	N				13	110328_WaxPromix10ulA10_NH4OH80ACN.5289.5289.2.dta
1					5374	1	1	1229.6	2457.18	2	2457.17	0.0093	319	340	1	53.89	26	46	0.0084	K	DAIPENLPPLTADFAEDKDVCK	N				12	110328_WaxPromix10ulA10_NH4OH80ACN.5218.5218.2.dta
1					5375	1	1	1229.6	2457.18	2	2457.17	0.0094	319	340	1	52.62	31	46	0.011	K	DAIPENLPPLTADFAEDKDVCK	N				13	110328_WaxPromix10ulA10_NH4OH80ACN.5121.5121.2.dta
1					5377	1	1	1229.6	2457.19	2	2457.17	0.0119	319	340	1	65.1	28	46	0.00064	K	DAIPENLPPLTADFAEDKDVCK	N				14	110328_WaxPromix10ulA10_NH4OH80ACN.5239.5239.2.dta
1					5436	1	1	831.424	2491.25	3	2491.26	-0.006	45	65	0	56.24	24	44	0.0035	K	GLVLIAFSQYLQQCPFDEHVK	L				21	110328_WaxPromix10ulA10_NH4OH80ACN.1900.1900.3.dta
1					5437	1	1	831.424	2491.25	3	2491.26	-0.0054	45	65	0	55.75	29	44	0.0039	K	GLVLIAFSQYLQQCPFDEHVK	L				25	110328_WaxPromix10ulA10_NH4OH80ACN.3281.3281.3.dta
1					5438	1	1	831.425	2491.25	3	2491.26	-0.0039	45	65	0	63.76	36	44	0.00061	K	GLVLIAFSQYLQQCPFDEHVK	L				21	110328_WaxPromix10ulA10_NH4OH80ACN.2349.2349.3.dta
1					5439	1	1	831.425	2491.25	3	2491.26	-0.0026	45	65	0	71.48	32	44	0.0001	K	GLVLIAFSQYLQQCPFDEHVK	L				19	110328_WaxPromix10ulA10_NH4OH80ACN.2407.2407.3.dta
1					5440	1	1	831.426	2491.26	3	2491.26	-0.0013	45	65	0	62.46	36	44	0.00081	K	GLVLIAFSQYLQQCPFDEHVK	L				15	110328_WaxPromix10ulA10_NH4OH80ACN.2778.2778.3.dta
1					5441	1	1	831.426	2491.26	3	2491.26	-0.0012	45	65	0	59.72	35	44	0.0015	K	GLVLIAFSQYLQQCPFDEHVK	L				13	110328_WaxPromix10ulA10_NH4OH80ACN.2296.2296.3.dta
1					5442	1	1	831.426	2491.26	3	2491.26	-0.0012	45	65	0	50.42	29	44	0.013	K	GLVLIAFSQYLQQCPFDEHVK	L				18	110328_WaxPromix10ulA10_NH4OH80ACN.7088.7088.3.dta
1					5443	1	1	831.426	2491.26	3	2491.26	-0.0011	45	65	0	75.17	32	44	4.3e-05	K	GLVLIAFSQYLQQCPFDEHVK	L				21	110328_WaxPromix10ulA10_NH4OH80ACN.3325.3325.3.dta
1					5444	1	1	831.426	2491.26	3	2491.26	-0.0004	45	65	0	45.87	27	44	0.037	K	GLVLIAFSQYLQQCPFDEHVK	L				16	110328_WaxPromix10ulA10_NH4OH80ACN.3827.3827.3.dta
1					5445	1	1	623.821	2491.26	4	2491.26	-0.0003	45	65	0	45.9	33	44	0.036	K	GLVLIAFSQYLQQCPFDEHVK	L				10	110328_WaxPromix10ulA10_NH4OH80ACN.2132.2132.4.dta
1					5446	1	1	831.426	2491.26	3	2491.26	0.0001	45	65	0	51.14	31	44	0.011	K	GLVLIAFSQYLQQCPFDEHVK	L				20	110328_WaxPromix10ulA10_NH4OH80ACN.3492.3492.3.dta
1					5447	1	1	831.427	2491.26	3	2491.26	0.0011	45	65	0	60.46	33	44	0.0013	K	GLVLIAFSQYLQQCPFDEHVK	L				17	110328_WaxPromix10ulA10_NH4OH80ACN.2558.2558.3.dta
1					5448	1	1	831.427	2491.26	3	2491.26	0.0017	45	65	0	65.77	38	44	0.00036	K	GLVLIAFSQYLQQCPFDEHVK	L				12	110328_WaxPromix10ulA10_NH4OH80ACN.3123.3123.3.dta
1					5449	1	1	623.822	2491.26	4	2491.26	0.0018	45	65	0	38.64	28	44	0.19	K	GLVLIAFSQYLQQCPFDEHVK	L				16	110328_WaxPromix10ulA10_NH4OH80ACN.2518.2518.4.dta
1					5450	1	1	831.427	2491.26	3	2491.26	0.0022	45	65	0	56.47	26	44	0.0031	K	GLVLIAFSQYLQQCPFDEHVK	L				19	110328_WaxPromix10ulA10_NH4OH80ACN.2891.2891.3.dta
1					5451	1	1	831.427	2491.26	3	2491.26	0.0029	45	65	0	70.09	36	44	0.00014	K	GLVLIAFSQYLQQCPFDEHVK	L				20	110328_WaxPromix10ulA10_NH4OH80ACN.3619.3619.3.dta
1					5452	1	1	831.427	2491.26	3	2491.26	0.003	45	65	0	66.29	32	44	0.00032	K	GLVLIAFSQYLQQCPFDEHVK	L				21	110328_WaxPromix10ulA10_NH4OH80ACN.3037.3037.3.dta
1					5453	1	1	831.427	2491.26	3	2491.26	0.0033	45	65	0	53.33	32	44	0.0063	K	GLVLIAFSQYLQQCPFDEHVK	L				11	110328_WaxPromix10ulA10_NH4OH80ACN.3562.3562.3.dta
1					5454	1	1	831.427	2491.26	3	2491.26	0.0034	45	65	0	64.12	32	44	0.00052	K	GLVLIAFSQYLQQCPFDEHVK	L				12	110328_WaxPromix10ulA10_NH4OH80ACN.3166.3166.3.dta
1					5455	1	1	831.427	2491.26	3	2491.26	0.0035	45	65	0	52.31	26	44	0.008	K	GLVLIAFSQYLQQCPFDEHVK	L				19	110328_WaxPromix10ulA10_NH4OH80ACN.2923.2923.3.dta
1					5456	1	1	831.427	2491.26	3	2491.26	0.0035	45	65	0	60.14	36	44	0.0013	K	GLVLIAFSQYLQQCPFDEHVK	L				19	110328_WaxPromix10ulA10_NH4OH80ACN.2073.2073.3.dta
1					5457	1	1	831.428	2491.26	3	2491.26	0.0041	45	65	0	62.25	33	44	0.0008	K	GLVLIAFSQYLQQCPFDEHVK	L				19	110328_WaxPromix10ulA10_NH4OH80ACN.2721.2721.3.dta
1					5458	1	1	623.823	2491.26	4	2491.26	0.0042	45	65	0	24.92	30	44	4.3	K	GLVLIAFSQYLQQCPFDEHVK	L				15	110328_WaxPromix10ulA10_NH4OH80ACN.3137.3137.4.dta
1					5459	1	1	831.428	2491.26	3	2491.26	0.0043	45	65	0	61.2	32	44	0.001	K	GLVLIAFSQYLQQCPFDEHVK	L				22	110328_WaxPromix10ulA10_NH4OH80ACN.3259.3259.3.dta
1					5460	1	1	831.428	2491.26	3	2491.26	0.005	45	65	0	53.02	31	44	0.0067	K	GLVLIAFSQYLQQCPFDEHVK	L				19	110328_WaxPromix10ulA10_NH4OH80ACN.3721.3721.3.dta
1					5461	1	1	831.428	2491.26	3	2491.26	0.005	45	65	0	73.27	41	44	6.4e-05	K	GLVLIAFSQYLQQCPFDEHVK	L				11	110328_WaxPromix10ulA10_NH4OH80ACN.2005.2005.3.dta
1					5462	1	1	831.428	2491.26	3	2491.26	0.0051	45	65	0	65.21	35	44	0.00041	K	GLVLIAFSQYLQQCPFDEHVK	L				18	110328_WaxPromix10ulA10_NH4OH80ACN.2668.2668.3.dta
1					5463	1	1	831.428	2491.26	3	2491.26	0.0055	45	65	0	59.2	29	44	0.0016	K	GLVLIAFSQYLQQCPFDEHVK	L				21	110328_WaxPromix10ulA10_NH4OH80ACN.2834.2834.3.dta
1					5464	1	1	831.428	2491.26	3	2491.26	0.0055	45	65	0	85.13	39	44	4.1e-06	K	GLVLIAFSQYLQQCPFDEHVK	L				20	110328_WaxPromix10ulA10_NH4OH80ACN.1953.1953.3.dta
1					5465	1	1	831.428	2491.26	3	2491.26	0.0056	45	65	0	55.01	27	44	0.0042	K	GLVLIAFSQYLQQCPFDEHVK	L				18	110328_WaxPromix10ulA10_NH4OH80ACN.2501.2501.3.dta
1					5466	1	1	831.428	2491.26	3	2491.26	0.0057	45	65	0	42.78	27	44	0.07	K	GLVLIAFSQYLQQCPFDEHVK	L				17	110328_WaxPromix10ulA10_NH4OH80ACN.2442.2442.3.dta
1					5467	1	1	831.428	2491.26	3	2491.26	0.0059	45	65	0	64.75	34	44	0.00044	K	GLVLIAFSQYLQQCPFDEHVK	L				18	110328_WaxPromix10ulA10_NH4OH80ACN.3211.3211.3.dta
1					5468	1	1	831.428	2491.26	3	2491.26	0.0065	45	65	0	69.35	33	44	0.00015	K	GLVLIAFSQYLQQCPFDEHVK	L				13	110328_WaxPromix10ulA10_NH4OH80ACN.2240.2240.3.dta
1					5469	1	1	623.823	2491.26	4	2491.26	0.0068	45	65	0	20.44	25	44	12	K	GLVLIAFSQYLQQCPFDEHVK	L				10	110328_WaxPromix10ulA10_NH4OH80ACN.3150.3150.4.dta
1					5470	1	1	831.429	2491.26	3	2491.26	0.0071	45	65	0	79.61		44	1.4e-05	K	GLVLIAFSQYLQQCPFDEHVK	L				21	110328_WaxPromix10ulA10_NH4OH80ACN.3082.3082.3.dta
1					5471	1	1	831.429	2491.26	3	2491.26	0.0074	45	65	0	68.13	35	44	0.0002	K	GLVLIAFSQYLQQCPFDEHVK	L				19	110328_WaxPromix10ulA10_NH4OH80ACN.2127.2127.3.dta
1					5472	1	1	831.429	2491.26	3	2491.26	0.008	45	65	0	58.54	29	44	0.0018	K	GLVLIAFSQYLQQCPFDEHVK	L				21	110328_WaxPromix10ulA10_NH4OH80ACN.2612.2612.3.dta
1					5473	1	1	831.429	2491.27	3	2491.26	0.0092	45	65	0	62.85	32	44	0.00068	K	GLVLIAFSQYLQQCPFDEHVK	L				11	110328_WaxPromix10ulA10_NH4OH80ACN.3371.3371.3.dta
1					5474	1	1	831.429	2491.27	3	2491.26	0.0094	45	65	0	50.3	28	44	0.012	K	GLVLIAFSQYLQQCPFDEHVK	L				12	110328_WaxPromix10ulA10_NH4OH80ACN.3770.3770.3.dta
1					5475	1	1	831.43	2491.27	3	2491.26	0.0103	45	65	0	52.68	29	44	0.0069	K	GLVLIAFSQYLQQCPFDEHVK	L				10	110328_WaxPromix10ulA10_NH4OH80ACN.3437.3437.3.dta
1					5476	1	1	831.43	2491.27	3	2491.26	0.0117	45	65	0	63.6	24	43	0.00055	K	GLVLIAFSQYLQQCPFDEHVK	L				12	110328_WaxPromix10ulA10_NH4OH80ACN.2945.2945.3.dta
1					5479	1	1	831.759	2492.25	3	2491.26	0.9979	45	65	0	63.26	26	44	0.00068	K	GLVLIAFSQYLQQCPFDEHVK	L				13	110328_WaxPromix10ulA10_NH4OH80ACN.1889.1889.3.dta
1					5480	1	1	624.072	2492.26	4	2491.26	1.0003	45	65	0	20.94	23	44	11	K	GLVLIAFSQYLQQCPFDEHVK	L				9	110328_WaxPromix10ulA10_NH4OH80ACN.2077.2077.4.dta
1					5482	1	1	831.761	2492.26	3	2491.26	1.0044	45	65	0	46.01	24	44	0.034	K	GLVLIAFSQYLQQCPFDEHVK	L				20	110328_WaxPromix10ulA10_NH4OH80ACN.2977.2977.3.dta
1					5483	1	1	831.761	2492.26	3	2491.26	1.0045	45	65	0	57.79	31	44	0.0023	K	GLVLIAFSQYLQQCPFDEHVK	L				21	110328_WaxPromix10ulA10_NH4OH80ACN.3389.3389.3.dta
1					5484	1	1	831.761	2492.26	3	2491.26	1.0049	45	65	0	45.67	29	44	0.036	K	GLVLIAFSQYLQQCPFDEHVK	L				19	110328_WaxPromix10ulA10_NH4OH80ACN.4038.4038.3.dta
1					5485	1	1	624.073	2492.26	4	2491.26	1.0057	45	65	0	38.41	33	44	0.19	K	GLVLIAFSQYLQQCPFDEHVK	L				12	110328_WaxPromix10ulA10_NH4OH80ACN.2000.2000.4.dta
1					5486	1	1	831.762	2492.26	3	2491.26	1.0059	45	65	0	54.83	29	44	0.0044	K	GLVLIAFSQYLQQCPFDEHVK	L				21	110328_WaxPromix10ulA10_NH4OH80ACN.3315.3315.3.dta
1					5487	1	1	831.762	2492.26	3	2491.26	1.007	45	65	0	78.53	29	44	1.9e-05	K	GLVLIAFSQYLQQCPFDEHVK	L				20	110328_WaxPromix10ulA10_NH4OH80ACN.3609.3609.3.dta
1					5489	1	1	831.763	2492.27	3	2491.26	1.01	45	65	0	76.17	28	44	3.1e-05	K	GLVLIAFSQYLQQCPFDEHVK	L				21	110328_WaxPromix10ulA10_NH4OH80ACN.3514.3514.3.dta
1					6057	1	1	753.118	3008.44	4	3008.44	0.0004	310	336	1	25.61	35	46	6.7	K	SHCIAEVEKDAIPENLPPLTADFAEDK	D				18	110328_WaxPromix10ulA10_NH4OH80ACN.4141.4141.4.dta
1					6058	1	1	753.118	3008.44	4	3008.44	0.0009	310	336	1	32.69	34	46	1.3	K	SHCIAEVEKDAIPENLPPLTADFAEDK	D				25	110328_WaxPromix10ulA10_NH4OH80ACN.4190.4190.4.dta
1					6059	1	1	1003.82	3008.45	3	3008.44	0.0015	310	336	1	51.37	33	46	0.018	K	SHCIAEVEKDAIPENLPPLTADFAEDK	D				22	110328_WaxPromix10ulA10_NH4OH80ACN.4161.4161.3.dta
1					6309	1	1	878.672	3510.66	4	3510.66	-0.0074	310	340	2	31.11	32	47	2.4	K	SHCIAEVEKDAIPENLPPLTADFAEDKDVCK	N				23	110328_WaxPromix10ulA10_NH4OH80ACN.4149.4149.4.dta
1					6310	1	1	703.14	3510.66	5	3510.66	-0.003	310	340	2	39.58	37	47	0.33	K	SHCIAEVEKDAIPENLPPLTADFAEDKDVCK	N				19	110328_WaxPromix10ulA10_NH4OH80ACN.3961.3961.5.dta
1					6313	3	1	703.14	3510.67	5	3510.66	0.0011	310	340	2	37.02		47	0.59	K	SHCIAEVEKDAIPENLPPLTADFAEDKDVCK	N				18	110328_WaxPromix10ulA10_NH4OH80ACN.3865.3865.5.dta
1					6314	9	1	703.14	3510.67	5	3510.66	0.0012	310	340	2	20.27	38	47	28	K	SHCIAEVEKDAIPENLPPLTADFAEDKDVCK	N				17	110328_WaxPromix10ulA10_NH4OH80ACN.3913.3913.5.dta
1					6315	1	1	703.141	3510.67	5	3510.66	0.0024	310	340	2	25.9	37	47	7.6	K	SHCIAEVEKDAIPENLPPLTADFAEDKDVCK	N				19	110328_WaxPromix10ulA10_NH4OH80ACN.4054.4054.5.dta
1					6316	1	1	703.141	3510.67	5	3510.66	0.0024	310	340	2	46.66	42	47	0.064	K	SHCIAEVEKDAIPENLPPLTADFAEDKDVCK	N				18	110328_WaxPromix10ulA10_NH4OH80ACN.4009.4009.5.dta
1					6319	1	1	878.674	3510.67	4	3510.66	0.0042	310	340	2	39.07		47	0.36	K	SHCIAEVEKDAIPENLPPLTADFAEDKDVCK	N				26	110328_WaxPromix10ulA10_NH4OH80ACN.3889.3889.4.dta
1					6320	1	1	878.675	3510.67	4	3510.66	0.0055	310	340	2	48.3	42	47	0.043	K	SHCIAEVEKDAIPENLPPLTADFAEDKDVCK	N				26	110328_WaxPromix10ulA10_NH4OH80ACN.3985.3985.4.dta
1					6321	1	1	878.675	3510.67	4	3510.66	0.0064	310	340	2	64.42	37	47	0.001	K	SHCIAEVEKDAIPENLPPLTADFAEDKDVCK	N				34	110328_WaxPromix10ulA10_NH4OH80ACN.3938.3938.4.dta
1					6322	1	1	878.675	3510.67	4	3510.66	0.0065	310	340	2	47.4	41	47	0.052	K	SHCIAEVEKDAIPENLPPLTADFAEDKDVCK	N				30	110328_WaxPromix10ulA10_NH4OH80ACN.4076.4076.4.dta
1					6323	1	1	878.675	3510.67	4	3510.66	0.0067	310	340	2	42.66	34	47	0.16	K	SHCIAEVEKDAIPENLPPLTADFAEDKDVCK	N				31	110328_WaxPromix10ulA10_NH4OH80ACN.4031.4031.4.dta
1					6324	1	1	878.676	3510.67	4	3510.66	0.0094	310	340	2	47.92	35	47	0.046	K	SHCIAEVEKDAIPENLPPLTADFAEDKDVCK	N				30	110328_WaxPromix10ulA10_NH4OH80ACN.3844.3844.4.dta
1					6325	7	1	703.142	3510.68	5	3510.66	0.0109	310	340	2	20.22	37	47	27	K	SHCIAEVEKDAIPENLPPLTADFAEDKDVCK	N				16	110328_WaxPromix10ulA10_NH4OH80ACN.3821.3821.5.dta
1					6327	1	1	878.922	3511.66	4	3511.65	0.0099	310	340	2	36.27		47	0.71	K	SHCIAEVEKDAIPENLPPLTADFAEDKDVCK	N		Deamidated (NQ)	0.0000000000000040000000000000000.0	25	110328_WaxPromix10ulA10_NH4OH80ACN.4136.4136.4.dta
1					6329	1	1	878.924	3511.67	4	3510.66	1.0027	310	340	2	28.04	37	47	4.6	K	SHCIAEVEKDAIPENLPPLTADFAEDKDVCK	N				13	110328_WaxPromix10ulA10_NH4OH80ACN.4345.4345.4.dta
1					6330	1	1	878.925	3511.67	4	3510.66	1.007	310	340	2	41.36	36	47	0.21	K	SHCIAEVEKDAIPENLPPLTADFAEDKDVCK	N				28	110328_WaxPromix10ulA10_NH4OH80ACN.3816.3816.4.dta
1					6333	1	1	1171.57	3511.68	3	3510.66	1.0155	310	340	2	49.91	35	47	0.028	K	SHCIAEVEKDAIPENLPPLTADFAEDKDVCK	N				38	110328_WaxPromix10ulA10_NH4OH80ACN.3945.3945.3.dta
1					6334	1	1	1171.57	3511.68	3	3510.66	1.0179	310	340	2	24.9	37	47	8.7	K	SHCIAEVEKDAIPENLPPLTADFAEDKDVCK	N				28	110328_WaxPromix10ulA10_NH4OH80ACN.4006.4006.3.dta	emPAI	77.96
2	OVAL_CHICK	Ovalbumin OS=Gallus gallus GN=SERPINB14 PE=1 SV=2	7845	43196	717	1	1	390.697	779.379	2	779.381	-0.0022	106	111	0	33.74		39	0.18	R	LYAEER	Y				5	110328_WaxPromix10ulA10_NH4OH80ACN.2401.2401.2.dta
2					718	1	1	390.697	779.38	2	779.381	-0.0015	106	111	0	31.9	36	37	0.19	R	LYAEER	Y				5	110328_WaxPromix10ulA10_NH4OH80ACN.2346.2346.2.dta
2					719	1	1	390.697	779.38	2	779.381	-0.0015	106	111	0	30.46	34	37	0.27	R	LYAEER	Y				5	110328_WaxPromix10ulA10_NH4OH80ACN.2295.2295.2.dta
2					720	1	1	390.697	779.38	2	779.381	-0.0011	106	111	0	33.8		37	0.12	R	LYAEER	Y				5	110328_WaxPromix10ulA10_NH4OH80ACN.2455.2455.2.dta
2					721	1	1	390.697	779.38	2	779.381	-0.0009	106	111	0	29.33		37	0.34	R	LYAEER	Y				5	110328_WaxPromix10ulA10_NH4OH80ACN.2557.2557.2.dta
2					722	1	1	390.698	779.381	2	779.381	-0.0002	106	111	0	24.78	28	38	1.1	R	LYAEER	Y				5	110328_WaxPromix10ulA10_NH4OH80ACN.2617.2617.2.dta
2					903	1	1	411.704	821.393	2	821.395	-0.0027	220	227	0	56.39	36	38	0.00082	R	VASMASEK	M				7	110328_WaxPromix10ulA10_NH4OH80ACN.1903.1903.2.dta
2					904	1	1	411.704	821.393	2	821.395	-0.002	220	227	0	41.42	33	38	0.026	R	VASMASEK	M				5	110328_WaxPromix10ulA10_NH4OH80ACN.1959.1959.2.dta
2					905	1	1	411.704	821.394	2	821.395	-0.0012	220	227	0	46.81	33	39	0.009	R	VASMASEK	M				6	110328_WaxPromix10ulA10_NH4OH80ACN.2072.2072.2.dta
2					906	1	1	411.704	821.394	2	821.395	-0.0011	220	227	0	32.34	29	39	0.25	R	VASMASEK	M				6	110328_WaxPromix10ulA10_NH4OH80ACN.1849.1849.2.dta
2					907	1	1	411.704	821.394	2	821.395	-0.0007	220	227	0	42.84	31	39	0.021	R	VASMASEK	M				6	110328_WaxPromix10ulA10_NH4OH80ACN.2016.2016.2.dta
2					908	1	1	411.705	821.395	2	821.395	-0.0004	220	227	0	34.2	26	39	0.16	R	VASMASEK	M				6	110328_WaxPromix10ulA10_NH4OH80ACN.2131.2131.2.dta
2					2035	1	1	605.262	1208.51	2	1208.51	-0.0038	191	200	0	61.87	35	39	0.00032	K	DEDTQAMPFR	V				8	110328_WaxPromix10ulA10_NH4OH80ACN.4697.4697.2.dta
2					2036	1	1	605.262	1208.51	2	1208.51	-0.0036	191	200	0	62.21	34	39	0.00029	K	DEDTQAMPFR	V				8	110328_WaxPromix10ulA10_NH4OH80ACN.4744.4744.2.dta
2					2037	1	1	605.262	1208.51	2	1208.51	-0.0029	191	200	0	22.16	28	39	3	K	DEDTQAMPFR	V				7	110328_WaxPromix10ulA10_NH4OH80ACN.5023.5023.2.dta
2					2038	1	1	605.263	1208.51	2	1208.51	-0.0026	191	200	0	60.68	35	39	0.00042	K	DEDTQAMPFR	V				8	110328_WaxPromix10ulA10_NH4OH80ACN.4790.4790.2.dta
2					2040	1	1	605.263	1208.51	2	1208.51	-0.0013	191	200	0	47.94	32	40	0.0081	K	DEDTQAMPFR	V				14	110328_WaxPromix10ulA10_NH4OH80ACN.4837.4837.2.dta
2					2041	1	1	605.263	1208.51	2	1208.51	-0.001	191	200	0	51.77	34	39	0.003	K	DEDTQAMPFR	V				14	110328_WaxPromix10ulA10_NH4OH80ACN.4651.4651.2.dta
2					2042	1	1	605.264	1208.51	2	1208.51	-0.0008	191	200	0	46.4	33	39	0.01	K	DEDTQAMPFR	V				8	110328_WaxPromix10ulA10_NH4OH80ACN.4610.4610.2.dta
2					2043	1	1	605.264	1208.51	2	1208.51	-0.0007	191	200	0	47.53	31	39	0.0081	K	DEDTQAMPFR	V				8	110328_WaxPromix10ulA10_NH4OH80ACN.4886.4886.2.dta
2					2044	1	1	605.264	1208.51	2	1208.51	0	191	200	0	40.78	34	39	0.04	K	DEDTQAMPFR	V				7	110328_WaxPromix10ulA10_NH4OH80ACN.4978.4978.2.dta
2					2045	1	1	605.264	1208.51	2	1208.51	0.0009	191	200	0	43.52		39	0.022	K	DEDTQAMPFR	V				7	110328_WaxPromix10ulA10_NH4OH80ACN.4932.4932.2.dta
2					2094	1	1	416.545	1246.61	3	1246.62	-0.0026	361	370	0	28.9	33	41	0.93	R	ADHPFLFCIK	H				8	110328_WaxPromix10ulA10_NH4OH80ACN.1601.1601.3.dta
2					2350	1	1	673.371	1344.73	2	1344.73	-0.0028	371	382	0	56.14	22	40	0.0015	K	HIATNAVLFFGR	C				9	110328_WaxPromix10ulA10_NH4OH80ACN.504.504.2.dta
2					2351	1	1	449.25	1344.73	3	1344.73	-0.0027	371	382	0	24.35	33	40	2.3	K	HIATNAVLFFGR	C				6	110328_WaxPromix10ulA10_NH4OH80ACN.932.932.3.dta
2					2352	1	1	673.371	1344.73	2	1344.73	-0.0025	371	382	0	55.58	25	41	0.0018	K	HIATNAVLFFGR	C				9	110328_WaxPromix10ulA10_NH4OH80ACN.810.810.2.dta
2					2353	1	1	449.25	1344.73	3	1344.73	-0.0024	371	382	0	22.85	31	41	3.4	K	HIATNAVLFFGR	C				10	110328_WaxPromix10ulA10_NH4OH80ACN.758.758.3.dta
2					2354	1	1	449.25	1344.73	3	1344.73	-0.0021	371	382	0	26.16	31	41	1.6	K	HIATNAVLFFGR	C				6	110328_WaxPromix10ulA10_NH4OH80ACN.843.843.3.dta
2					2355	1	1	673.371	1344.73	2	1344.73	-0.0021	371	382	0	67.4	24	41	0.00012	K	HIATNAVLFFGR	C				9	110328_WaxPromix10ulA10_NH4OH80ACN.548.548.2.dta
2					2356	1	1	449.25	1344.73	3	1344.73	-0.002	371	382	0	29.84	33	41	0.67	K	HIATNAVLFFGR	C				5	110328_WaxPromix10ulA10_NH4OH80ACN.713.713.3.dta
2					2357	1	1	449.25	1344.73	3	1344.73	-0.0019	371	382	0	29.91		41	0.66	K	HIATNAVLFFGR	C				6	110328_WaxPromix10ulA10_NH4OH80ACN.670.670.3.dta
2					2358	1	1	449.25	1344.73	3	1344.73	-0.0017	371	382	0	25.81	35	41	1.7	K	HIATNAVLFFGR	C				5	110328_WaxPromix10ulA10_NH4OH80ACN.624.624.3.dta
2					2360	1	1	449.25	1344.73	3	1344.73	-0.0016	371	382	0	25.02	32	41	2	K	HIATNAVLFFGR	C				12	110328_WaxPromix10ulA10_NH4OH80ACN.533.533.3.dta
2					2361	1	1	673.372	1344.73	2	1344.73	-0.0015	371	382	0	57.79	22	41	0.0011	K	HIATNAVLFFGR	C				10	110328_WaxPromix10ulA10_NH4OH80ACN.593.593.2.dta
2					2362	2	1	449.25	1344.73	3	1344.73	-0.0014	371	382	0	22.5	36	41	3.6	K	HIATNAVLFFGR	C				10	110328_WaxPromix10ulA10_NH4OH80ACN.889.889.3.dta
2					2363	1	1	449.25	1344.73	3	1344.73	-0.0013	371	382	0	23.68	30	41	2.7	K	HIATNAVLFFGR	C				7	110328_WaxPromix10ulA10_NH4OH80ACN.582.582.3.dta
2					2364	1	1	673.372	1344.73	2	1344.73	-0.0011	371	382	0	53.24	24	41	0.003	K	HIATNAVLFFGR	C				10	110328_WaxPromix10ulA10_NH4OH80ACN.768.768.2.dta
2					2365	1	1	673.372	1344.73	2	1344.73	-0.0011	371	382	0	46.67	24	41	0.014	K	HIATNAVLFFGR	C				9	110328_WaxPromix10ulA10_NH4OH80ACN.942.942.2.dta
2					2366	1	1	673.372	1344.73	2	1344.73	-0.0011	371	382	0	43.39	22	41	0.029	K	HIATNAVLFFGR	C				10	110328_WaxPromix10ulA10_NH4OH80ACN.890.890.2.dta
2					2367	1	1	673.372	1344.73	2	1344.73	-0.0007	371	382	0	59.22	27	41	0.00078	K	HIATNAVLFFGR	C				15	110328_WaxPromix10ulA10_NH4OH80ACN.726.726.2.dta
2					2368	1	1	673.372	1344.73	2	1344.73	-0.0003	371	382	0	31.35	22	41	0.47	K	HIATNAVLFFGR	C				17	110328_WaxPromix10ulA10_NH4OH80ACN.460.460.2.dta
2					2369	1	1	449.251	1344.73	3	1344.73	0	371	382	0	28.45	35	40	0.87	K	HIATNAVLFFGR	C				10	110328_WaxPromix10ulA10_NH4OH80ACN.800.800.3.dta
2					2370	1	1	673.372	1344.73	2	1344.73	0.0002	371	382	0	60.39	23	40	0.00055	K	HIATNAVLFFGR	C				10	110328_WaxPromix10ulA10_NH4OH80ACN.637.637.2.dta
2					2371	1	1	673.373	1344.73	2	1344.73	0.0003	371	382	0	51.92	27	40	0.0039	K	HIATNAVLFFGR	C				9	110328_WaxPromix10ulA10_NH4OH80ACN.681.681.2.dta
2					3184	1	1	761.899	1521.78	2	1521.79	-0.0069	112	123	0	60.61		42	0.00081	R	YPILPEYLQCVK	E				18	110328_WaxPromix10ulA10_NH4OH80ACN.1056.1056.2.dta
2					3185	1	1	761.899	1521.78	2	1521.79	-0.0065	112	123	0	59.62	37	42	0.00096	R	YPILPEYLQCVK	E				16	110328_WaxPromix10ulA10_NH4OH80ACN.1012.1012.2.dta
2					3186	1	1	761.9	1521.78	2	1521.79	-0.0055	112	123	0	52.5		42	0.0053	R	YPILPEYLQCVK	E				17	110328_WaxPromix10ulA10_NH4OH80ACN.1100.1100.2.dta
2					3187	1	1	761.9	1521.79	2	1521.79	-0.0039	112	123	0	55.1	40	42	0.0029	R	YPILPEYLQCVK	E				18	110328_WaxPromix10ulA10_NH4OH80ACN.969.969.2.dta
2					3188	1	1	508.27	1521.79	3	1521.79	-0.0022	112	123	0	29.74		42	1	R	YPILPEYLQCVK	E				8	110328_WaxPromix10ulA10_NH4OH80ACN.976.976.3.dta
2					3189	1	1	761.901	1521.79	2	1521.79	-0.002	112	123	0	48.9	34	42	0.012	R	YPILPEYLQCVK	E				16	110328_WaxPromix10ulA10_NH4OH80ACN.928.928.2.dta
2					3190	1	1	761.902	1521.79	2	1521.79	-0.0015	112	123	0	46.28	38	42	0.022	R	YPILPEYLQCVK	E				13	110328_WaxPromix10ulA10_NH4OH80ACN.1317.1317.2.dta
2					3191	1	1	508.27	1521.79	3	1521.79	-0.001	112	123	0	32.67	34	42	0.47	R	YPILPEYLQCVK	E				8	110328_WaxPromix10ulA10_NH4OH80ACN.1018.1018.3.dta
2					3193	1	1	761.903	1521.79	2	1521.79	0.0012	112	123	0	47.5	38	42	0.017	R	YPILPEYLQCVK	E				12	110328_WaxPromix10ulA10_NH4OH80ACN.1144.1144.2.dta
2					3194	1	1	761.903	1521.79	2	1521.79	0.0012	112	123	0	34.16	36	42	0.36	R	YPILPEYLQCVK	E				10	110328_WaxPromix10ulA10_NH4OH80ACN.1260.1260.2.dta
2					3195	1	1	761.903	1521.79	2	1521.79	0.0022	112	123	0	42.77	37	42	0.05	R	YPILPEYLQCVK	E				18	110328_WaxPromix10ulA10_NH4OH80ACN.1200.1200.2.dta
2					3392	1	1	519.245	1554.71	3	1554.71	-0.0021	188	200	1	47.76	34	43	0.018	K	AFKDEDTQAMPFR	V				7	110328_WaxPromix10ulA10_NH4OH80ACN.2742.2742.3.dta
2					3393	1	1	519.245	1554.71	3	1554.71	-0.002	188	200	1	44.75	32	43	0.036	K	AFKDEDTQAMPFR	V				13	110328_WaxPromix10ulA10_NH4OH80ACN.2798.2798.3.dta
2					3394	1	1	519.245	1554.71	3	1554.71	-0.0013	188	200	1	43.01	36	43	0.056	K	AFKDEDTQAMPFR	V				12	110328_WaxPromix10ulA10_NH4OH80ACN.2692.2692.3.dta
2					3395	1	1	519.245	1554.71	3	1554.71	-0.0009	188	200	1	39.52	30	43	0.12	K	AFKDEDTQAMPFR	V				12	110328_WaxPromix10ulA10_NH4OH80ACN.2972.2972.3.dta
2					3396	1	1	519.245	1554.71	3	1554.71	-0.0007	188	200	1	28.78	30	43	1.5	K	AFKDEDTQAMPFR	V				8	110328_WaxPromix10ulA10_NH4OH80ACN.3025.3025.3.dta
2					3397	1	1	519.245	1554.71	3	1554.71	-0.0004	188	200	1	27.43	26	43	2	K	AFKDEDTQAMPFR	V				7	110328_WaxPromix10ulA10_NH4OH80ACN.3070.3070.3.dta
2					3398	1	1	519.245	1554.71	3	1554.71	-0.0003	188	200	1	33.93	33	43	0.44	K	AFKDEDTQAMPFR	V				12	110328_WaxPromix10ulA10_NH4OH80ACN.2914.2914.3.dta
2					3399	1	1	519.245	1554.71	3	1554.71	0.0004	188	200	1	40.13	34	43	0.11	K	AFKDEDTQAMPFR	V				13	110328_WaxPromix10ulA10_NH4OH80ACN.2856.2856.3.dta
2					3400	1	1	778.364	1554.71	2	1554.71	0.0004	188	200	1	58.48	38	43	0.0016	K	AFKDEDTQAMPFR	V				10	110328_WaxPromix10ulA10_NH4OH80ACN.2765.2765.2.dta
2					3401	1	1	778.365	1554.71	2	1554.71	0.0007	188	200	1	49.52	34	43	0.012	K	AFKDEDTQAMPFR	V				16	110328_WaxPromix10ulA10_NH4OH80ACN.2822.2822.2.dta
2					3402	1	1	778.365	1554.71	2	1554.71	0.0009	188	200	1	76.15	42	43	2.6e-05	K	AFKDEDTQAMPFR	V				11	110328_WaxPromix10ulA10_NH4OH80ACN.2712.2712.2.dta
2					3527	1	1	791.363	1580.71	2	1580.71	-0.003	265	277	0	76.57	28	43	2.3e-05	K	LTEWTSSNVMEER	K				10	110328_WaxPromix10ulA10_NH4OH80ACN.2930.2930.2.dta
2					3528	1	1	791.364	1580.71	2	1580.71	-0.0013	265	277	0	80.9	32	43	8.7e-06	K	LTEWTSSNVMEER	K				11	110328_WaxPromix10ulA10_NH4OH80ACN.2985.2985.2.dta
2					3530	1	1	791.364	1580.71	2	1580.71	-0.0003	265	277	0	38.26	26	43	0.16	K	LTEWTSSNVMEER	K				6	110328_WaxPromix10ulA10_NH4OH80ACN.3621.3621.2.dta
2					3531	1	1	791.365	1580.71	2	1580.71	0.0008	265	277	0	74.2	32	43	4e-05	K	LTEWTSSNVMEER	K				10	110328_WaxPromix10ulA10_NH4OH80ACN.3119.3119.2.dta
2					3533	1	1	791.365	1580.72	2	1580.71	0.0012	265	277	0	40.33	24	43	0.095	K	LTEWTSSNVMEER	K				9	110328_WaxPromix10ulA10_NH4OH80ACN.3630.3630.2.dta
2					3534	1	1	791.365	1580.72	2	1580.71	0.0012	265	277	0	30.12	28	43	1	K	LTEWTSSNVMEER	K				6	110328_WaxPromix10ulA10_NH4OH80ACN.3782.3782.2.dta
2					3535	1	1	791.365	1580.72	2	1580.71	0.0013	265	277	0	69.4	25	43	0.00012	K	LTEWTSSNVMEER	K				9	110328_WaxPromix10ulA10_NH4OH80ACN.3164.3164.2.dta
2					3536	1	1	791.365	1580.72	2	1580.71	0.0013	265	277	0	74.2	32	43	3.9e-05	K	LTEWTSSNVMEER	K				10	110328_WaxPromix10ulA10_NH4OH80ACN.3031.3031.2.dta
2					3537	1	1	791.365	1580.72	2	1580.71	0.0014	265	277	0	55.8	29	43	0.0027	K	LTEWTSSNVMEER	K				10	110328_WaxPromix10ulA10_NH4OH80ACN.3406.3406.2.dta
2					3538	1	1	791.365	1580.72	2	1580.71	0.0014	265	277	0	46.4	28	43	0.024	K	LTEWTSSNVMEER	K				7	110328_WaxPromix10ulA10_NH4OH80ACN.3347.3347.2.dta
2					3539	1	1	791.365	1580.72	2	1580.71	0.0015	265	277	0	69.36	28	43	0.00012	K	LTEWTSSNVMEER	K				9	110328_WaxPromix10ulA10_NH4OH80ACN.2888.2888.2.dta
2					3540	1	1	791.365	1580.72	2	1580.71	0.0018	265	277	0	57.37	32	43	0.002	K	LTEWTSSNVMEER	K				9	110328_WaxPromix10ulA10_NH4OH80ACN.3302.3302.2.dta
2					3541	1	1	791.365	1580.72	2	1580.71	0.0018	265	277	0	86.11	35	43	2.6e-06	K	LTEWTSSNVMEER	K				11	110328_WaxPromix10ulA10_NH4OH80ACN.3076.3076.2.dta
2					3542	1	1	791.365	1580.72	2	1580.71	0.0022	265	277	0	76.32	29	43	2.5e-05	K	LTEWTSSNVMEER	K				10	110328_WaxPromix10ulA10_NH4OH80ACN.3252.3252.2.dta
2					3543	1	1	791.365	1580.72	2	1580.71	0.0022	265	277	0	32.65	30	43	0.56	K	LTEWTSSNVMEER	K				8	110328_WaxPromix10ulA10_NH4OH80ACN.3787.3787.2.dta
2					3544	1	1	791.366	1580.72	2	1580.71	0.0032	265	277	0	62.55	35	43	0.00059	K	LTEWTSSNVMEER	K				9	110328_WaxPromix10ulA10_NH4OH80ACN.3209.3209.2.dta
2					3545	1	1	791.366	1580.72	2	1580.71	0.004	265	277	0	52.64	23	43	0.0059	K	LTEWTSSNVMEER	K				8	110328_WaxPromix10ulA10_NH4OH80ACN.3528.3528.2.dta
2					3546	1	1	791.366	1580.72	2	1580.71	0.0042	265	277	0	55.59	34	43	0.003	K	LTEWTSSNVMEER	K				10	110328_WaxPromix10ulA10_NH4OH80ACN.3469.3469.2.dta
2					3549	1	1	791.854	1581.69	2	1581.7	-0.0046	265	277	0	49.08	30	42	0.012	K	LTEWTSSNVMEER	K		Deamidated (NQ)	0.0000000400000.0	10	110328_WaxPromix10ulA10_NH4OH80ACN.4922.4922.2.dta
2					3782	1	1	844.422	1686.83	2	1686.83	-0.0042	128	143	0	84.14	29	43	4.7e-06	R	GGLEPINFQTAADQAR	E				22	110328_WaxPromix10ulA10_NH4OH80ACN.2676.2676.2.dta
2					3783	1	1	844.423	1686.83	2	1686.83	-0.0021	128	143	0	85.25	30	43	3.6e-06	R	GGLEPINFQTAADQAR	E				19	110328_WaxPromix10ulA10_NH4OH80ACN.2620.2620.2.dta
2					3784	1	1	563.284	1686.83	3	1686.83	-0.0012	128	143	0	53.82	41	43	0.005	R	GGLEPINFQTAADQAR	E				8	110328_WaxPromix10ulA10_NH4OH80ACN.2677.2677.3.dta
2					3785	1	1	563.284	1686.83	3	1686.83	-0.0011	128	143	0	43.03	33	43	0.06	R	GGLEPINFQTAADQAR	E				8	110328_WaxPromix10ulA10_NH4OH80ACN.2571.2571.3.dta
2					3786	1	1	563.284	1686.83	3	1686.83	-0.0011	128	143	0	62.81	40	43	0.00063	R	GGLEPINFQTAADQAR	E				16	110328_WaxPromix10ulA10_NH4OH80ACN.2621.2621.3.dta
2					3787	1	1	844.424	1686.83	2	1686.83	0.0005	128	143	0	72.05	31	43	7.4e-05	R	GGLEPINFQTAADQAR	E				18	110328_WaxPromix10ulA10_NH4OH80ACN.2900.2900.2.dta
2					3788	1	1	844.424	1686.83	2	1686.83	0.0006	128	143	0	68.73	29	43	0.00016	R	GGLEPINFQTAADQAR	E				20	110328_WaxPromix10ulA10_NH4OH80ACN.2566.2566.2.dta
2					3789	1	1	844.424	1686.83	2	1686.83	0.0014	128	143	0	76.83	33	43	2.4e-05	R	GGLEPINFQTAADQAR	E				21	110328_WaxPromix10ulA10_NH4OH80ACN.2732.2732.2.dta
2					3790	1	1	844.424	1686.83	2	1686.83	0.002	128	143	0	81.25	33	43	8.5e-06	R	GGLEPINFQTAADQAR	E				12	110328_WaxPromix10ulA10_NH4OH80ACN.2845.2845.2.dta
2					3791	1	1	844.425	1686.84	2	1686.83	0.0027	128	143	0	74.28	33	43	4.3e-05	R	GGLEPINFQTAADQAR	E				12	110328_WaxPromix10ulA10_NH4OH80ACN.2788.2788.2.dta
2					3792	1	1	844.426	1686.84	2	1686.83	0.0045	128	143	0	48.64	32	43	0.016	R	GGLEPINFQTAADQAR	E				11	110328_WaxPromix10ulA10_NH4OH80ACN.3226.3226.2.dta
2					3793	1	1	844.426	1686.84	2	1686.83	0.0048	128	143	0	77.97	32	43	1.8e-05	R	GGLEPINFQTAADQAR	E				10	110328_WaxPromix10ulA10_NH4OH80ACN.2944.2944.2.dta
2					3798	1	1	844.914	1687.81	2	1687.82	-0.003	128	143	0	53.33	28	43	0.0057	R	GGLEPINFQTAADQAR	E		Deamidated (NQ)	0.0000004000000000.0	10	110328_WaxPromix10ulA10_NH4OH80ACN.3780.3780.2.dta
2					3799	1	1	844.915	1687.82	2	1687.82	0	128	143	0	51.48	25	43	0.0088	R	GGLEPINFQTAADQAR	E		Deamidated (NQ)	0.0000004000000000.0	10	110328_WaxPromix10ulA10_NH4OH80ACN.3881.3881.2.dta
2					3800	1	1	844.917	1687.82	2	1687.82	0.0019	128	143	0	51.08	36	43	0.0095	R	GGLEPINFQTAADQAR	E		Deamidated (NQ)	0.0000004000000000.0	11	110328_WaxPromix10ulA10_NH4OH80ACN.3831.3831.2.dta
2					4022	1	1	444.229	1772.89	4	1772.89	-0.0036	324	340	0	61.82	38	43	0.00071	K	ISQAVHAAHAEINEAGR	E				11	110328_WaxPromix10ulA10_NH4OH80ACN.2214.2214.4.dta
2					4023	1	1	444.229	1772.89	4	1772.89	-0.0033	324	340	0	35.45	35	43	0.31	K	ISQAVHAAHAEINEAGR	E				14	110328_WaxPromix10ulA10_NH4OH80ACN.3800.3800.4.dta
2					4024	1	1	591.97	1772.89	3	1772.89	-0.0029	324	340	0	70.26	31	43	0.00011	K	ISQAVHAAHAEINEAGR	E				19	110328_WaxPromix10ulA10_NH4OH80ACN.2218.2218.3.dta
2					4025	1	1	444.229	1772.89	4	1772.89	-0.0027	324	340	0	36.78		43	0.23	K	ISQAVHAAHAEINEAGR	E				13	110328_WaxPromix10ulA10_NH4OH80ACN.4519.4519.4.dta
2					4026	1	1	444.23	1772.89	4	1772.89	-0.0025	324	340	0	47.44	37	43	0.02	K	ISQAVHAAHAEINEAGR	E				15	110328_WaxPromix10ulA10_NH4OH80ACN.3344.3344.4.dta
2					4027	1	1	444.23	1772.89	4	1772.89	-0.0024	324	340	0	58.59	38	43	0.0016	K	ISQAVHAAHAEINEAGR	E				11	110328_WaxPromix10ulA10_NH4OH80ACN.2379.2379.4.dta
2					4028	1	1	444.23	1772.89	4	1772.89	-0.0024	324	340	0	25.69	28	43	3.1	K	ISQAVHAAHAEINEAGR	E				8	110328_WaxPromix10ulA10_NH4OH80ACN.4727.4727.4.dta
2					4029	1	1	444.23	1772.89	4	1772.89	-0.0024	324	340	0	61.51	36	43	0.00083	K	ISQAVHAAHAEINEAGR	E				19	110328_WaxPromix10ulA10_NH4OH80ACN.2598.2598.4.dta
2					4030	1	1	444.23	1772.89	4	1772.89	-0.0024	324	340	0	24.16	29	43	4.5	K	ISQAVHAAHAEINEAGR	E				7	110328_WaxPromix10ulA10_NH4OH80ACN.4857.4857.4.dta
2					4031	1	1	591.97	1772.89	3	1772.89	-0.0023	324	340	0	54.25	35	43	0.0044	K	ISQAVHAAHAEINEAGR	E				19	110328_WaxPromix10ulA10_NH4OH80ACN.2391.2391.3.dta
2					4033	1	1	591.971	1772.89	3	1772.89	-0.002	324	340	0	43.59	25	43	0.051	K	ISQAVHAAHAEINEAGR	E				16	110328_WaxPromix10ulA10_NH4OH80ACN.3350.3350.3.dta
2					4034	1	1	444.23	1772.89	4	1772.89	-0.002	324	340	0	62.49	34	43	0.00065	K	ISQAVHAAHAEINEAGR	E				12	110328_WaxPromix10ulA10_NH4OH80ACN.2435.2435.4.dta
2					4035	1	1	444.23	1772.89	4	1772.89	-0.002	324	340	0	33	41	43	0.58	K	ISQAVHAAHAEINEAGR	E				16	110328_WaxPromix10ulA10_NH4OH80ACN.3991.3991.4.dta
2					4036	1	1	444.23	1772.89	4	1772.89	-0.0018	324	340	0	40.76	33	43	0.095	K	ISQAVHAAHAEINEAGR	E				17	110328_WaxPromix10ulA10_NH4OH80ACN.3120.3120.4.dta
2					4037	1	1	444.23	1772.89	4	1772.89	-0.0018	324	340	0	47.72	29	43	0.019	K	ISQAVHAAHAEINEAGR	E				18	110328_WaxPromix10ulA10_NH4OH80ACN.2269.2269.4.dta
2					4039	1	1	444.23	1772.89	4	1772.89	-0.0018	324	340	0	40.98	34	43	0.09	K	ISQAVHAAHAEINEAGR	E				16	110328_WaxPromix10ulA10_NH4OH80ACN.4252.4252.4.dta
2					4040	1	1	591.971	1772.89	3	1772.89	-0.0018	324	340	0	35.66	28	43	0.31	K	ISQAVHAAHAEINEAGR	E				15	110328_WaxPromix10ulA10_NH4OH80ACN.3734.3734.3.dta
2					4041	1	1	444.23	1772.89	4	1772.89	-0.0017	324	340	0	43.98	35	43	0.045	K	ISQAVHAAHAEINEAGR	E				17	110328_WaxPromix10ulA10_NH4OH80ACN.2489.2489.4.dta
2					4042	1	1	444.23	1772.89	4	1772.89	-0.0017	324	340	0	52.8	38	43	0.006	K	ISQAVHAAHAEINEAGR	E				17	110328_WaxPromix10ulA10_NH4OH80ACN.2160.2160.4.dta
2					4043	1	1	444.23	1772.89	4	1772.89	-0.0017	324	340	0	58.6	39	43	0.0016	K	ISQAVHAAHAEINEAGR	E				18	110328_WaxPromix10ulA10_NH4OH80ACN.2646.2646.4.dta
2					4044	1	1	444.23	1772.89	4	1772.89	-0.0017	324	340	0	49.67	35	43	0.012	K	ISQAVHAAHAEINEAGR	E				17	110328_WaxPromix10ulA10_NH4OH80ACN.2701.2701.4.dta
2					4045	1	1	591.971	1772.89	3	1772.89	-0.0017	324	340	0	44.61	34	43	0.039	K	ISQAVHAAHAEINEAGR	E				15	110328_WaxPromix10ulA10_NH4OH80ACN.3390.3390.3.dta
2					4046	1	1	444.23	1772.89	4	1772.89	-0.0016	324	340	0	48.67	40	43	0.016	K	ISQAVHAAHAEINEAGR	E				17	110328_WaxPromix10ulA10_NH4OH80ACN.2543.2543.4.dta
2					4047	1	1	444.23	1772.89	4	1772.89	-0.0015	324	340	0	51.91	33	43	0.0074	K	ISQAVHAAHAEINEAGR	E				15	110328_WaxPromix10ulA10_NH4OH80ACN.3253.3253.4.dta
2					4048	1	1	444.23	1772.89	4	1772.89	-0.0015	324	340	0	50.06	42	43	0.011	K	ISQAVHAAHAEINEAGR	E				20	110328_WaxPromix10ulA10_NH4OH80ACN.2323.2323.4.dta
2					4049	1	1	444.23	1772.89	4	1772.89	-0.0014	324	340	0	20.87	31	43	9.4	K	ISQAVHAAHAEINEAGR	E				15	110328_WaxPromix10ulA10_NH4OH80ACN.4079.4079.4.dta
2					4050	1	1	444.23	1772.89	4	1772.89	-0.0014	324	340	0	25.58	34	43	3.2	K	ISQAVHAAHAEINEAGR	E				16	110328_WaxPromix10ulA10_NH4OH80ACN.4785.4785.4.dta
2					4051	1	1	444.23	1772.89	4	1772.89	-0.0012	324	340	0	61.73		43	0.00076	K	ISQAVHAAHAEINEAGR	E				17	110328_WaxPromix10ulA10_NH4OH80ACN.2812.2812.4.dta
2					4052	1	1	591.971	1772.89	3	1772.89	-0.0012	324	340	0	68.51	35	43	0.00016	K	ISQAVHAAHAEINEAGR	E				18	110328_WaxPromix10ulA10_NH4OH80ACN.2338.2338.3.dta
2					4053	1	1	444.23	1772.89	4	1772.89	-0.0011	324	340	0	26.75	32	43	2.4	K	ISQAVHAAHAEINEAGR	E				16	110328_WaxPromix10ulA10_NH4OH80ACN.3709.3709.4.dta
2					4054	1	1	444.23	1772.89	4	1772.89	-0.001	324	340	0	22.09	30	43	7	K	ISQAVHAAHAEINEAGR	E				17	110328_WaxPromix10ulA10_NH4OH80ACN.4035.4035.4.dta
2					4055	1	1	444.23	1772.89	4	1772.89	-0.0009	324	340	0	43.53	32	43	0.05	K	ISQAVHAAHAEINEAGR	E				13	110328_WaxPromix10ulA10_NH4OH80ACN.3570.3570.4.dta
2					4056	1	1	591.971	1772.89	3	1772.89	-0.0009	324	340	0	61.12	31	43	0.00088	K	ISQAVHAAHAEINEAGR	E				17	110328_WaxPromix10ulA10_NH4OH80ACN.2720.2720.3.dta
2					4057	1	1	444.23	1772.89	4	1772.89	-0.0009	324	340	0	25.64	38	43	3.1	K	ISQAVHAAHAEINEAGR	E				13	110328_WaxPromix10ulA10_NH4OH80ACN.3753.3753.4.dta
2					4058	1	1	444.23	1772.89	4	1772.89	-0.0008	324	340	0	49.31	38	43	0.013	K	ISQAVHAAHAEINEAGR	E				19	110328_WaxPromix10ulA10_NH4OH80ACN.2756.2756.4.dta
2					4059	1	1	444.23	1772.89	4	1772.89	-0.0008	324	340	0	38.07	33	43	0.18	K	ISQAVHAAHAEINEAGR	E				9	110328_WaxPromix10ulA10_NH4OH80ACN.3163.3163.4.dta
2					4060	1	1	591.971	1772.89	3	1772.89	-0.0007	324	340	0	57.81	29	43	0.0019	K	ISQAVHAAHAEINEAGR	E				19	110328_WaxPromix10ulA10_NH4OH80ACN.2889.2889.3.dta
2					4061	1	1	444.23	1772.89	4	1772.89	-0.0006	324	340	0	34.19	34	43	0.45	K	ISQAVHAAHAEINEAGR	E				9	110328_WaxPromix10ulA10_NH4OH80ACN.3208.3208.4.dta
2					4062	1	1	591.971	1772.89	3	1772.89	-0.0006	324	340	0	62.55	29	43	0.00066	K	ISQAVHAAHAEINEAGR	E				19	110328_WaxPromix10ulA10_NH4OH80ACN.2444.2444.3.dta
2					4063	1	1	591.971	1772.89	3	1772.89	-0.0006	324	340	0	41.12	26	43	0.091	K	ISQAVHAAHAEINEAGR	E				15	110328_WaxPromix10ulA10_NH4OH80ACN.3835.3835.3.dta
2					4065	1	1	591.971	1772.89	3	1772.89	-0.0005	324	340	0	58.37	32	43	0.0017	K	ISQAVHAAHAEINEAGR	E				17	110328_WaxPromix10ulA10_NH4OH80ACN.2272.2272.3.dta
2					4066	1	1	444.23	1772.89	4	1772.89	-0.0003	324	340	0	34.97	40	43	0.36	K	ISQAVHAAHAEINEAGR	E				14	110328_WaxPromix10ulA10_NH4OH80ACN.3663.3663.4.dta
2					4067	1	1	444.23	1772.89	4	1772.89	-0.0003	324	340	0	20.8	33	43	9.5	K	ISQAVHAAHAEINEAGR	E				12	110328_WaxPromix10ulA10_NH4OH80ACN.4565.4565.4.dta
2					4068	1	1	444.23	1772.89	4	1772.89	-0.0003	324	340	0	25.87	29	43	2.9	K	ISQAVHAAHAEINEAGR	E				12	110328_WaxPromix10ulA10_NH4OH80ACN.4198.4198.4.dta
2					4069	1	1	444.23	1772.89	4	1772.89	-0.0003	324	340	0	46.75	37	43	0.024	K	ISQAVHAAHAEINEAGR	E				15	110328_WaxPromix10ulA10_NH4OH80ACN.2877.2877.4.dta
2					4070	1	1	591.971	1772.89	3	1772.89	-0.0002	324	340	0	48.09	28	43	0.018	K	ISQAVHAAHAEINEAGR	E				16	110328_WaxPromix10ulA10_NH4OH80ACN.3035.3035.3.dta
2					4071	1	1	444.23	1772.89	4	1772.89	-0.0002	324	340	0	33.92	33	43	0.46	K	ISQAVHAAHAEINEAGR	E				14	110328_WaxPromix10ulA10_NH4OH80ACN.3613.3613.4.dta
2					4072	1	1	444.23	1772.89	4	1772.89	-0.0002	324	340	0	31.89	32	43	0.73	K	ISQAVHAAHAEINEAGR	E				12	110328_WaxPromix10ulA10_NH4OH80ACN.4146.4146.4.dta
2					4073	1	1	591.971	1772.89	3	1772.89	-0.0002	324	340	0	57.86	26	43	0.0019	K	ISQAVHAAHAEINEAGR	E				19	110328_WaxPromix10ulA10_NH4OH80ACN.3639.3639.3.dta
2					4074	1	1	444.23	1772.89	4	1772.89	-0.0001	324	340	0	52.76	34	43	0.006	K	ISQAVHAAHAEINEAGR	E				17	110328_WaxPromix10ulA10_NH4OH80ACN.2932.2932.4.dta
2					4075	1	1	444.23	1772.89	4	1772.89	-0.0001	324	340	0	56.78	37	43	0.0024	K	ISQAVHAAHAEINEAGR	E				19	110328_WaxPromix10ulA10_NH4OH80ACN.3033.3033.4.dta
2					4076	1	1	444.23	1772.89	4	1772.89	-0.0001	324	340	0	30.35	31	43	1	K	ISQAVHAAHAEINEAGR	E				14	110328_WaxPromix10ulA10_NH4OH80ACN.4680.4680.4.dta
2					4077	1	1	591.971	1772.89	3	1772.89	0	324	340	0	60.44	30	43	0.001	K	ISQAVHAAHAEINEAGR	E				19	110328_WaxPromix10ulA10_NH4OH80ACN.2667.2667.3.dta
2					4078	1	1	591.971	1772.89	3	1772.89	0	324	340	0	40.48	30	43	0.1	K	ISQAVHAAHAEINEAGR	E				15	110328_WaxPromix10ulA10_NH4OH80ACN.3791.3791.3.dta
2					4079	1	1	444.23	1772.89	4	1772.89	0.0001	324	340	0	39	32	43	0.15	K	ISQAVHAAHAEINEAGR	E				9	110328_WaxPromix10ulA10_NH4OH80ACN.3848.3848.4.dta
2					4080	1	1	444.23	1772.89	4	1772.89	0.0001	324	340	0	57.52	35	43	0.0021	K	ISQAVHAAHAEINEAGR	E				18	110328_WaxPromix10ulA10_NH4OH80ACN.2986.2986.4.dta
2					4082	3	1	444.23	1772.89	4	1772.89	0.0002	324	340	0	21.93	35	43	7.4	K	ISQAVHAAHAEINEAGR	E				19	110328_WaxPromix10ulA10_NH4OH80ACN.3947.3947.4.dta
2					4083	1	1	591.971	1772.89	3	1772.89	0.0002	324	340	0	65.17	27	43	0.00035	K	ISQAVHAAHAEINEAGR	E				19	110328_WaxPromix10ulA10_NH4OH80ACN.2776.2776.3.dta
2					4084	1	1	444.23	1772.89	4	1772.89	0.0002	324	340	0	21.83	34	43	7.6	K	ISQAVHAAHAEINEAGR	E				11	110328_WaxPromix10ulA10_NH4OH80ACN.4300.4300.4.dta
2					4085	1	1	591.971	1772.89	3	1772.89	0.0002	324	340	0	55.54	33	43	0.0032	K	ISQAVHAAHAEINEAGR	E				18	110328_WaxPromix10ulA10_NH4OH80ACN.2554.2554.3.dta
2					4086	1	1	591.971	1772.89	3	1772.89	0.0003	324	340	0	50.91	31	43	0.0093	K	ISQAVHAAHAEINEAGR	E				19	110328_WaxPromix10ulA10_NH4OH80ACN.3256.3256.3.dta
2					4087	1	1	444.23	1772.89	4	1772.89	0.0004	324	340	0	43.09	41	43	0.056	K	ISQAVHAAHAEINEAGR	E				17	110328_WaxPromix10ulA10_NH4OH80ACN.3300.3300.4.dta
2					4088	1	1	591.971	1772.89	3	1772.89	0.0004	324	340	0	39.35	26	43	0.13	K	ISQAVHAAHAEINEAGR	E				16	110328_WaxPromix10ulA10_NH4OH80ACN.3471.3471.3.dta
2					4089	1	1	444.23	1772.89	4	1772.89	0.0005	324	340	0	38.53	33	43	0.16	K	ISQAVHAAHAEINEAGR	E				12	110328_WaxPromix10ulA10_NH4OH80ACN.3477.3477.4.dta
2					4090	1	1	444.23	1772.89	4	1772.89	0.0005	324	340	0	61.28	37	43	0.00084	K	ISQAVHAAHAEINEAGR	E				17	110328_WaxPromix10ulA10_NH4OH80ACN.3432.3432.4.dta
2					4091	1	1	591.971	1772.89	3	1772.89	0.0006	324	340	0	48.61	23	43	0.016	K	ISQAVHAAHAEINEAGR	E				17	110328_WaxPromix10ulA10_NH4OH80ACN.3078.3078.3.dta
2					4092	1	1	591.971	1772.89	3	1772.89	0.0007	324	340	0	52.51	26	43	0.0064	K	ISQAVHAAHAEINEAGR	E				15	110328_WaxPromix10ulA10_NH4OH80ACN.2832.2832.3.dta
2					4093	1	1	591.971	1772.89	3	1772.89	0.0008	324	340	0	48.87	26	43	0.015	K	ISQAVHAAHAEINEAGR	E				17	110328_WaxPromix10ulA10_NH4OH80ACN.3512.3512.3.dta
2					4094	1	1	591.971	1772.89	3	1772.89	0.0009	324	340	0	56.32	33	43	0.0027	K	ISQAVHAAHAEINEAGR	E				18	110328_WaxPromix10ulA10_NH4OH80ACN.2499.2499.3.dta
2					4095	1	1	444.23	1772.89	4	1772.89	0.0009	324	340	0	40.01	32	43	0.12	K	ISQAVHAAHAEINEAGR	E				16	110328_WaxPromix10ulA10_NH4OH80ACN.3388.3388.4.dta
2					4096	1	1	591.971	1772.89	3	1772.89	0.0009	324	340	0	60.04	31	43	0.0012	K	ISQAVHAAHAEINEAGR	E				18	110328_WaxPromix10ulA10_NH4OH80ACN.2164.2164.3.dta
2					4097	1	1	444.23	1772.89	4	1772.89	0.0009	324	340	0	28.23	35	43	1.7	K	ISQAVHAAHAEINEAGR	E				13	110328_WaxPromix10ulA10_NH4OH80ACN.3895.3895.4.dta
2					4098	1	1	591.971	1772.89	3	1772.89	0.001	324	340	0	60.84	30	43	0.00097	K	ISQAVHAAHAEINEAGR	E				20	110328_WaxPromix10ulA10_NH4OH80ACN.2611.2611.3.dta
2					4099	1	1	591.971	1772.89	3	1772.89	0.001	324	340	0	54.96	29	43	0.0037	K	ISQAVHAAHAEINEAGR	E				19	110328_WaxPromix10ulA10_NH4OH80ACN.3165.3165.3.dta
2					4100	3	1	444.231	1772.89	4	1772.89	0.0011	324	340	0	26.26	34	43	2.8	K	ISQAVHAAHAEINEAGR	E				13	110328_WaxPromix10ulA10_NH4OH80ACN.4634.4634.4.dta
2					4101	1	1	591.972	1772.89	3	1772.89	0.0011	324	340	0	45.2	28	43	0.035	K	ISQAVHAAHAEINEAGR	E				17	110328_WaxPromix10ulA10_NH4OH80ACN.3212.3212.3.dta
2					4102	1	1	591.972	1772.89	3	1772.89	0.0012	324	340	0	54.06	27	43	0.0045	K	ISQAVHAAHAEINEAGR	E				17	110328_WaxPromix10ulA10_NH4OH80ACN.3580.3580.3.dta
2					4103	1	1	591.972	1772.89	3	1772.89	0.0012	324	340	0	58.78	26	43	0.0015	K	ISQAVHAAHAEINEAGR	E				17	110328_WaxPromix10ulA10_NH4OH80ACN.2936.2936.3.dta
2					4104	1	1	444.231	1772.89	4	1772.89	0.0013	324	340	0	53	36	43	0.0057	K	ISQAVHAAHAEINEAGR	E				19	110328_WaxPromix10ulA10_NH4OH80ACN.3077.3077.4.dta
2					4105	1	1	591.972	1772.89	3	1772.89	0.0014	324	340	0	30.92	22	43	0.91	K	ISQAVHAAHAEINEAGR	E				14	110328_WaxPromix10ulA10_NH4OH80ACN.3688.3688.3.dta
2					4107	1	1	887.454	1772.89	2	1772.89	0.0018	324	340	0	75.59	24	43	3.1e-05	K	ISQAVHAAHAEINEAGR	E				12	110328_WaxPromix10ulA10_NH4OH80ACN.2317.2317.2.dta
2					4108	1	1	887.454	1772.89	2	1772.89	0.0022	324	340	0	86.47	28	43	2.5e-06	K	ISQAVHAAHAEINEAGR	E				22	110328_WaxPromix10ulA10_NH4OH80ACN.2238.2238.2.dta
2					4109	1	1	591.972	1772.89	3	1772.89	0.0024	324	340	0	51.59	27	43	0.0076	K	ISQAVHAAHAEINEAGR	E				17	110328_WaxPromix10ulA10_NH4OH80ACN.3124.3124.3.dta
2					4110	1	1	591.972	1772.89	3	1772.89	0.0024	324	340	0	54.03	28	43	0.0044	K	ISQAVHAAHAEINEAGR	E				17	110328_WaxPromix10ulA10_NH4OH80ACN.2990.2990.3.dta
2					4111	1	1	591.972	1772.89	3	1772.89	0.0029	324	340	0	47.69	30	43	0.019	K	ISQAVHAAHAEINEAGR	E				16	110328_WaxPromix10ulA10_NH4OH80ACN.3306.3306.3.dta
2					4112	1	1	887.455	1772.89	2	1772.89	0.0032	324	340	0	66.11	23	43	0.00027	K	ISQAVHAAHAEINEAGR	E				13	110328_WaxPromix10ulA10_NH4OH80ACN.2429.2429.2.dta
2					4113	1	1	887.456	1772.9	2	1772.89	0.0053	324	340	0	71.46	26	43	7.7e-05	K	ISQAVHAAHAEINEAGR	E				24	110328_WaxPromix10ulA10_NH4OH80ACN.2186.2186.2.dta
2					4116	1	1	444.477	1773.88	4	1773.88	0.0033	324	340	0	45.44	36	44	0.036	K	ISQAVHAAHAEINEAGR	E		Deamidated (NQ)	0.00000000000040000.0	15	110328_WaxPromix10ulA10_NH4OH80ACN.2866.2866.4.dta
2					4348	1	1	620.326	1857.96	3	1857.96	-0.0024	144	159	0	57.55		43	0.0018	R	ELINSWVESQTNGIIR	N				20	110328_WaxPromix10ulA10_NH4OH80ACN.2217.2217.3.dta
2					4349	1	1	620.326	1857.96	3	1857.96	-0.0018	144	159	0	43.02	36	43	0.05	R	ELINSWVESQTNGIIR	N				15	110328_WaxPromix10ulA10_NH4OH80ACN.2286.2286.3.dta
2					4350	1	1	929.986	1857.96	2	1857.96	-0.0008	144	159	0	86.34	31	43	2.4e-06	R	ELINSWVESQTNGIIR	N				12	110328_WaxPromix10ulA10_NH4OH80ACN.2215.2215.2.dta
2					4351	1	1	929.987	1857.96	2	1857.96	0.0009	144	159	0	84.61	32	43	3.5e-06	R	ELINSWVESQTNGIIR	N				12	110328_WaxPromix10ulA10_NH4OH80ACN.2310.2310.2.dta
2					4352	1	1	620.327	1857.96	3	1857.96	0.0015	144	159	0	32.3	33	42	0.58	R	ELINSWVESQTNGIIR	N				17	110328_WaxPromix10ulA10_NH4OH80ACN.2167.2167.3.dta
2					4353	1	1	929.99	1857.96	2	1857.96	0.0066	144	159	0	96.68	39	42	2e-07	R	ELINSWVESQTNGIIR	N				12	110328_WaxPromix10ulA10_NH4OH80ACN.2166.2166.2.dta
2					4354	1	1	620.653	1858.94	3	1858.94	-0.0044	144	159	0	53.4	34	43	0.0055	R	ELINSWVESQTNGIIR	N		Deamidated (NQ)	0.0000000000040000.0	9	110328_WaxPromix10ulA10_NH4OH80ACN.3374.3374.3.dta
2					4356	1	1	620.654	1858.94	3	1858.94	-0.0028	144	159	0	52.57	36	43	0.0065	R	ELINSWVESQTNGIIR	N		Deamidated (NQ)	0.0000000000040000.0	15	110328_WaxPromix10ulA10_NH4OH80ACN.3330.3330.3.dta
2					4357	1	1	620.654	1858.94	3	1858.94	-0.0024	144	159	0	49.54	33	43	0.013	R	ELINSWVESQTNGIIR	N		Deamidated (NQ)	0.0000000000040000.0	11	110328_WaxPromix10ulA10_NH4OH80ACN.3419.3419.3.dta
2					4358	1	1	930.477	1858.94	2	1858.94	-0.0024	144	159	0	86.44	35	43	2.6e-06	R	ELINSWVESQTNGIIR	N		Deamidated (NQ)	0.0000000000040000.0	12	110328_WaxPromix10ulA10_NH4OH80ACN.3375.3375.2.dta
2					4360	1	1	930.478	1858.94	2	1858.94	-0.0006	144	159	0	103.18	41	43	5.6e-08	R	ELINSWVESQTNGIIR	N		Deamidated (NQ)	0.0000000000040000.0	10	110328_WaxPromix10ulA10_NH4OH80ACN.3331.3331.2.dta
2					4361	1	1	930.478	1858.94	2	1858.94	-0.0006	144	159	0	83.36	34	43	5.4e-06	R	ELINSWVESQTNGIIR	N		Deamidated (NQ)	0.0000000000040000.0	12	110328_WaxPromix10ulA10_NH4OH80ACN.2762.2762.2.dta
2					4362	1	1	930.478	1858.94	2	1858.94	-0.0005	144	159	0	78.94	31	43	1.5e-05	R	ELINSWVESQTNGIIR	N		Deamidated (NQ)	0.0000000000040000.0	12	110328_WaxPromix10ulA10_NH4OH80ACN.3648.3648.2.dta
2					4363	1	1	620.655	1858.94	3	1858.94	-0.0003	144	159	0	27.31	27	43	2.1	R	ELINSWVESQTNGIIR	N		Deamidated (NQ)	0.0000000000040000.0	16	110328_WaxPromix10ulA10_NH4OH80ACN.2761.2761.3.dta
2					4364	1	1	620.655	1858.94	3	1858.94	0	144	159	0	61.01		43	0.00089	R	ELINSWVESQTNGIIR	N		Deamidated (NQ)	0.0000000000040000.0	10	110328_WaxPromix10ulA10_NH4OH80ACN.2811.2811.3.dta
2					4365	1	1	620.655	1858.94	3	1858.94	0.0001	144	159	0	31.88	36	43	0.73	R	ELINSWVESQTNGIIR	N		Deamidated (NQ)	0.0000000000040000.0	16	110328_WaxPromix10ulA10_NH4OH80ACN.3463.3463.3.dta
2					4366	1	1	930.479	1858.94	2	1858.94	0.0001	144	159	0	103.68		43	4.8e-08	R	ELINSWVESQTNGIIR	N		Deamidated (NQ)	0.0000000000040000.0	10	110328_WaxPromix10ulA10_NH4OH80ACN.3420.3420.2.dta
2					4367	1	1	620.655	1858.94	3	1858.94	0.0005	144	159	0	24.42	25	43	4.3	R	ELINSWVESQTNGIIR	N		Deamidated (NQ)	0.0004000000000000.0	17	110328_WaxPromix10ulA10_NH4OH80ACN.3135.3135.3.dta
2					4368	1	1	620.655	1858.94	3	1858.94	0.0006	144	159	0	57.4		43	0.0021	R	ELINSWVESQTNGIIR	N		Deamidated (NQ)	0.0000000000040000.0	20	110328_WaxPromix10ulA10_NH4OH80ACN.2864.2864.3.dta
2					4369	1	1	930.479	1858.94	2	1858.94	0.0007	144	159	0	103.47	42	43	5.2e-08	R	ELINSWVESQTNGIIR	N		Deamidated (NQ)	0.0000000000040000.0	10	110328_WaxPromix10ulA10_NH4OH80ACN.2810.2810.2.dta
2					4370	1	1	620.655	1858.94	3	1858.94	0.0012	144	159	0	26.29	36	43	2.7	R	ELINSWVESQTNGIIR	N		Deamidated (NQ)	0.0000000000040000.0	14	110328_WaxPromix10ulA10_NH4OH80ACN.3554.3554.3.dta
2					4371	1	1	620.655	1858.94	3	1858.94	0.0016	144	159	0	38.52		43	0.16	R	ELINSWVESQTNGIIR	N		Deamidated (NQ)	0.0000000000040000.0	16	110328_WaxPromix10ulA10_NH4OH80ACN.3507.3507.3.dta
2					4373	1	1	620.655	1858.94	3	1858.94	0.0019	144	159	0	21.2	23	43	8.6	R	ELINSWVESQTNGIIR	N		Deamidated (NQ)	0.0004000000000000.0	12	110328_WaxPromix10ulA10_NH4OH80ACN.3178.3178.3.dta
2					4374	1	1	930.48	1858.94	2	1858.94	0.0023	144	159	0	97.33		43	2e-07	R	ELINSWVESQTNGIIR	N		Deamidated (NQ)	0.0000000000040000.0	10	110328_WaxPromix10ulA10_NH4OH80ACN.3464.3464.2.dta
2					4375	1	1	930.48	1858.94	2	1858.94	0.0023	144	159	0	78.54	36	43	1.5e-05	R	ELINSWVESQTNGIIR	N		Deamidated (NQ)	0.0000000000040000.0	14	110328_WaxPromix10ulA10_NH4OH80ACN.3605.3605.2.dta
2					4376	1	1	930.48	1858.95	2	1858.94	0.0028	144	159	0	86.14	38	43	2.7e-06	R	ELINSWVESQTNGIIR	N		Deamidated (NQ)	0.0000000000040000.0	10	110328_WaxPromix10ulA10_NH4OH80ACN.2955.2955.2.dta
2					4377	1	1	930.48	1858.95	2	1858.94	0.0029	144	159	0	58.72	35	43	0.0015	R	ELINSWVESQTNGIIR	N		Deamidated (NQ)	0.0000000000040000.0	12	110328_WaxPromix10ulA10_NH4OH80ACN.3793.3793.2.dta
2					4378	1	1	930.48	1858.95	2	1858.94	0.003	144	159	0	83.35	35	43	5e-06	R	ELINSWVESQTNGIIR	N		Deamidated (NQ)	0.0000000000040000.0	12	110328_WaxPromix10ulA10_NH4OH80ACN.2865.2865.2.dta
2					4379	1	1	930.48	1858.95	2	1858.94	0.003	144	159	0	65.42	37	43	0.00031	R	ELINSWVESQTNGIIR	N		Deamidated (NQ)	0.0000000000040000.0	12	110328_WaxPromix10ulA10_NH4OH80ACN.3741.3741.2.dta
2					4380	1	1	930.48	1858.95	2	1858.94	0.0032	144	159	0	78.3	38	43	1.6e-05	R	ELINSWVESQTNGIIR	N		Deamidated (NQ)	0.0000000000040000.0	9	110328_WaxPromix10ulA10_NH4OH80ACN.2950.2950.2.dta
2					4381	1	1	930.48	1858.95	2	1858.94	0.0036	144	159	0	103.18	42	43	5.3e-08	R	ELINSWVESQTNGIIR	N		Deamidated (NQ)	0.0000000000040000.0	10	110328_WaxPromix10ulA10_NH4OH80ACN.3555.3555.2.dta
2					4382	1	1	930.48	1858.95	2	1858.94	0.0036	144	159	0	77.79	34	43	1.8e-05	R	ELINSWVESQTNGIIR	N		Deamidated (NQ)	0.0004000000000000.0	12	110328_WaxPromix10ulA10_NH4OH80ACN.3156.3156.2.dta
2					4383	1	1	930.481	1858.95	2	1858.94	0.0039	144	159	0	74.89	32	43	3.5e-05	R	ELINSWVESQTNGIIR	N		Deamidated (NQ)	0.0000000000040000.0	12	110328_WaxPromix10ulA10_NH4OH80ACN.3698.3698.2.dta
2					4384	1	1	930.481	1858.95	2	1858.94	0.0045	144	159	0	81.51	33	43	7.6e-06	R	ELINSWVESQTNGIIR	N		Deamidated (NQ)	0.0000000000040000.0	12	110328_WaxPromix10ulA10_NH4OH80ACN.3290.3290.2.dta
2					4385	1	1	930.481	1858.95	2	1858.94	0.0045	144	159	0	104.56	39	43	3.8e-08	R	ELINSWVESQTNGIIR	N		Deamidated (NQ)	0.0000000000040000.0	11	110328_WaxPromix10ulA10_NH4OH80ACN.3508.3508.2.dta
2					4386	1	1	930.482	1858.95	2	1858.94	0.0062	144	159	0	71.01	33	43	8.7e-05	R	ELINSWVESQTNGIIR	N		Deamidated (NQ)	0.0004000000000000.0	9	110328_WaxPromix10ulA10_NH4OH80ACN.3133.3133.2.dta
2					4388	1	1	620.982	1859.92	3	1859.93	-0.0033	144	159	0	29.81	31	44	1.3	R	ELINSWVESQTNGIIR	N		2 Deamidated (NQ)	0.0004000000040000.0	14	110328_WaxPromix10ulA10_NH4OH80ACN.4492.4492.3.dta
2					4389	1	1	930.97	1859.93	2	1859.93	-0.0013	144	159	0	79.32	32	44	1.5e-05	R	ELINSWVESQTNGIIR	N		2 Deamidated (NQ)	0.0004000000040000.0	20	110328_WaxPromix10ulA10_NH4OH80ACN.4481.4481.2.dta
2					4390	1	1	620.983	1859.93	3	1859.93	-0.0006	144	159	0	34.26	25	44	0.48	R	ELINSWVESQTNGIIR	N		2 Deamidated (NQ)	0.0004000000040000.0	23	110328_WaxPromix10ulA10_NH4OH80ACN.5329.5329.3.dta
2					4391	1	1	930.97	1859.93	2	1859.93	-0.0006	144	159	0	91.65	30	44	8.8e-07	R	ELINSWVESQTNGIIR	N		2 Deamidated (NQ)	0.0004000000040000.0	10	110328_WaxPromix10ulA10_NH4OH80ACN.4230.4230.2.dta
2					4393	1	1	620.983	1859.93	3	1859.93	0.0008	144	159	0	39.26	28	44	0.15	R	ELINSWVESQTNGIIR	N		2 Deamidated (NQ)	0.0004000000040000.0	8	110328_WaxPromix10ulA10_NH4OH80ACN.5410.5410.3.dta
2					4394	1	1	930.971	1859.93	2	1859.93	0.0011	144	159	0	77.21	32	44	2.4e-05	R	ELINSWVESQTNGIIR	N		2 Deamidated (NQ)	0.0004000000040000.0	11	110328_WaxPromix10ulA10_NH4OH80ACN.5304.5304.2.dta
2					4395	1	1	620.983	1859.93	3	1859.93	0.0016	144	159	0	30.17	39	43	1.2	R	ELINSWVESQTNGIIR	N		2 Deamidated (NQ)	0.0004000000040000.0	8	110328_WaxPromix10ulA10_NH4OH80ACN.4541.4541.3.dta
2					4396	1	1	930.971	1859.93	2	1859.93	0.0021	144	159	0	91.77	31	44	8.5e-07	R	ELINSWVESQTNGIIR	N		2 Deamidated (NQ)	0.0004000000040000.0	10	110328_WaxPromix10ulA10_NH4OH80ACN.5497.5497.2.dta
2					4397	1	1	930.972	1859.93	2	1859.93	0.0021	144	159	0	77.65	32	44	2.2e-05	R	ELINSWVESQTNGIIR	N		2 Deamidated (NQ)	0.0004000000040000.0	13	110328_WaxPromix10ulA10_NH4OH80ACN.5447.5447.2.dta
2					4398	1	1	930.972	1859.93	2	1859.93	0.0026	144	159	0	97.58	29	43	2.1e-07	R	ELINSWVESQTNGIIR	N		2 Deamidated (NQ)	0.0004000000040000.0	10	110328_WaxPromix10ulA10_NH4OH80ACN.5396.5396.2.dta
2					4399	1	1	930.972	1859.93	2	1859.93	0.0034	144	159	0	70.1	31	43	0.00012	R	ELINSWVESQTNGIIR	N		2 Deamidated (NQ)	0.0004000000040000.0	9	110328_WaxPromix10ulA10_NH4OH80ACN.4206.4206.2.dta
2					4400	1	1	930.972	1859.93	2	1859.93	0.0037	144	159	0	80.68	35	43	1e-05	R	ELINSWVESQTNGIIR	N		2 Deamidated (NQ)	0.0004000000040000.0	12	110328_WaxPromix10ulA10_NH4OH80ACN.4528.4528.2.dta
2					4401	1	1	620.984	1859.93	3	1859.93	0.0038	144	159	0	38.36	35	43	0.18	R	ELINSWVESQTNGIIR	N		2 Deamidated (NQ)	0.0004000000040000.0	9	110328_WaxPromix10ulA10_NH4OH80ACN.5363.5363.3.dta
2					4402	1	1	930.972	1859.93	2	1859.93	0.004	144	159	0	88.64	29	43	1.6e-06	R	ELINSWVESQTNGIIR	N		2 Deamidated (NQ)	0.0004000000040000.0	13	110328_WaxPromix10ulA10_NH4OH80ACN.5346.5346.2.dta
2					4403	1	1	930.973	1859.93	2	1859.93	0.0049	144	159	0	91.29	31	43	8.8e-07	R	ELINSWVESQTNGIIR	N		2 Deamidated (NQ)	0.0004000000040000.0	10	110328_WaxPromix10ulA10_NH4OH80ACN.4539.4539.2.dta
2					4404	1	1	930.973	1859.93	2	1859.93	0.006	144	159	0	91.54	33	43	8.6e-07	R	ELINSWVESQTNGIIR	N		2 Deamidated (NQ)	0.0004000000040000.0	10	110328_WaxPromix10ulA10_NH4OH80ACN.5529.5529.2.dta
2					4405	1	1	930.974	1859.93	2	1859.93	0.0077	144	159	0	90.18	33	43	1.2e-06	R	ELINSWVESQTNGIIR	N		2 Deamidated (NQ)	0.0004000000040000.0	11	110328_WaxPromix10ulA10_NH4OH80ACN.4578.4578.2.dta
2					4406	1	1	621.318	1860.93	3	1859.93	1.0061	144	159	0	38.34	35	43	0.18	R	ELINSWVESQTNGIIR	N		2 Deamidated (NQ)	0.0004000000040000.0	8	110328_WaxPromix10ulA10_NH4OH80ACN.5489.5489.3.dta
2					4770	1	1	670.319	2007.94	3	2007.94	-0.0026	341	360	0	48.29	26	45	0.025	R	EVVGSAEAGVDAASVSEEFR	A				21	110328_WaxPromix10ulA10_NH4OH80ACN.4828.4828.3.dta
2					4771	1	1	670.319	2007.94	3	2007.94	-0.0018	341	360	0	65.77	29	45	0.00043	R	EVVGSAEAGVDAASVSEEFR	A				13	110328_WaxPromix10ulA10_NH4OH80ACN.4873.4873.3.dta
2					4772	1	1	670.32	2007.94	3	2007.94	-0.0004	341	360	0	59.47	27	45	0.0019	R	EVVGSAEAGVDAASVSEEFR	A				13	110328_WaxPromix10ulA10_NH4OH80ACN.5008.5008.3.dta
2					4773	1	1	670.32	2007.94	3	2007.94	0.0001	341	360	0	41.58	27	45	0.12	R	EVVGSAEAGVDAASVSEEFR	A				17	110328_WaxPromix10ulA10_NH4OH80ACN.5101.5101.3.dta
2					4774	1	1	670.32	2007.94	3	2007.94	0.0002	341	360	0	72.79	28	45	8.9e-05	R	EVVGSAEAGVDAASVSEEFR	A				11	110328_WaxPromix10ulA10_NH4OH80ACN.4963.4963.3.dta
2					4775	1	1	670.32	2007.94	3	2007.94	0.0003	341	360	0	56.01	29	45	0.0042	R	EVVGSAEAGVDAASVSEEFR	A				10	110328_WaxPromix10ulA10_NH4OH80ACN.4918.4918.3.dta
2					4776	1	1	1004.98	2007.94	2	2007.94	0.0007	341	360	0	139.45	37	45	1.9e-11	R	EVVGSAEAGVDAASVSEEFR	A				17	110328_WaxPromix10ulA10_NH4OH80ACN.4895.4895.2.dta
2					4777	1	1	1004.98	2007.94	2	2007.94	0.0018	341	360	0	131.89	42	45	1.1e-10	R	EVVGSAEAGVDAASVSEEFR	A				13	110328_WaxPromix10ulA10_NH4OH80ACN.4985.4985.2.dta
2					4778	1	1	1004.98	2007.94	2	2007.94	0.002	341	360	0	129.37	44	45	1.9e-10	R	EVVGSAEAGVDAASVSEEFR	A				17	110328_WaxPromix10ulA10_NH4OH80ACN.4850.4850.2.dta
2					4779	1	1	1004.98	2007.94	2	2007.94	0.0023	341	360	0	131.85		45	1.1e-10	R	EVVGSAEAGVDAASVSEEFR	A				16	110328_WaxPromix10ulA10_NH4OH80ACN.5076.5076.2.dta
2					4780	1	1	1004.98	2007.94	2	2007.94	0.0024	341	360	0	124.08		45	6.5e-10	R	EVVGSAEAGVDAASVSEEFR	A				16	110328_WaxPromix10ulA10_NH4OH80ACN.4940.4940.2.dta
2					4781	1	1	670.321	2007.94	3	2007.94	0.004	341	360	0	58.97	27	45	0.0021	R	EVVGSAEAGVDAASVSEEFR	A				10	110328_WaxPromix10ulA10_NH4OH80ACN.5053.5053.3.dta
2					4782	1	1	1004.98	2007.94	2	2007.94	0.0042	341	360	0	126.44		45	3.8e-10	R	EVVGSAEAGVDAASVSEEFR	A				16	110328_WaxPromix10ulA10_NH4OH80ACN.5029.5029.2.dta
2					4783	1	1	1004.98	2007.95	2	2007.94	0.0074	341	360	0	131.6	36	45	1.1e-10	R	EVVGSAEAGVDAASVSEEFR	A				16	110328_WaxPromix10ulA10_NH4OH80ACN.4830.4830.2.dta
2					5142	1	1	761.066	2280.18	3	2280.18	0	86	105	0	31.52	32	43	0.78	R	DILNQITKPNDVYSFSLASR	L				19	110328_WaxPromix10ulA10_NH4OH80ACN.2399.2399.3.dta
2					5144	1	1	762.056	2283.15	3	2283.14	0.0063	201	219	0	32.78	28	44	0.75	R	VTEQESKPVQMMYQIGLFR	V				16	110328_WaxPromix10ulA10_NH4OH80ACN.1934.1934.3.dta
2					5146	1	1	762.06	2283.16	3	2283.16	-0.0014	106	123	1	37.72	35	44	0.22	R	LYAEERYPILPEYLQCVK	E				18	110328_WaxPromix10ulA10_NH4OH80ACN.2033.2033.3.dta
2					5147	1	1	762.063	2283.17	3	2283.16	0.0078	106	123	1	35.24	34	43	0.35	R	LYAEERYPILPEYLQCVK	E				19	110328_WaxPromix10ulA10_NH4OH80ACN.1977.1977.3.dta
2					5410	1	1	820.776	2459.31	3	2459.31	-0.0033	160	182	0	44.22	27	41	0.027	R	NVLQPSSVDSQTAMVLVNAIVFK	G				20	110328_WaxPromix10ulA10_NH4OH80ACN.1596.1596.3.dta
2					5411	1	1	820.776	2459.31	3	2459.31	-0.0023	160	182	0	42.21	26	41	0.043	R	NVLQPSSVDSQTAMVLVNAIVFK	G				13	110328_WaxPromix10ulA10_NH4OH80ACN.1539.1539.3.dta
2					5412	1	1	820.777	2459.31	3	2459.31	-0.0004	160	182	0	39.55	29	41	0.076	R	NVLQPSSVDSQTAMVLVNAIVFK	G				19	110328_WaxPromix10ulA10_NH4OH80ACN.1485.1485.3.dta
2					5413	1	1	1230.66	2459.31	2	2459.31	0.0006	160	182	0	103.5	28	41	3e-08	R	NVLQPSSVDSQTAMVLVNAIVFK	G				15	110328_WaxPromix10ulA10_NH4OH80ACN.1519.1519.2.dta
2					5414	1	1	1230.66	2459.31	2	2459.31	0.002	160	182	0	88.12	28	41	1e-06	R	NVLQPSSVDSQTAMVLVNAIVFK	G				23	110328_WaxPromix10ulA10_NH4OH80ACN.1567.1567.2.dta
2					5500	1	1	837.716	2510.13	3	2510.13	-0.0009	63	85	0	56.52	31	46	0.0052	K	LPGFGDSIEAQCGTSVNVHSSLR	D		Phospho (ST)	0.00000020000000000000000.0	24	110328_WaxPromix10ulA10_NH4OH80ACN.3919.3919.3.dta
2					5501	1	1	837.717	2510.13	3	2510.13	0.0037	63	85	0	57.07	33	46	0.0047	K	LPGFGDSIEAQCGTSVNVHSSLR	D		Phospho (ST)	0.00000020000000000000000.0	26	110328_WaxPromix10ulA10_NH4OH80ACN.3819.3819.3.dta
2					5502	1	1	837.718	2510.13	3	2510.13	0.0065	63	85	0	70.57	33	46	0.00021	K	LPGFGDSIEAQCGTSVNVHSSLR	D		Phospho (ST)	0.00000020000000000000000.0	26	110328_WaxPromix10ulA10_NH4OH80ACN.3777.3777.3.dta
2					5503	1	1	837.718	2510.13	3	2510.13	0.0065	63	85	0	74.62	27	46	8.1e-05	K	LPGFGDSIEAQCGTSVNVHSSLR	D		Phospho (ST)	0.00000020000000000000000.0	29	110328_WaxPromix10ulA10_NH4OH80ACN.3866.3866.3.dta
2					5504	1	1	838.051	2511.13	3	2510.13	1.0037	63	85	0	45.4	36	46	0.067	K	LPGFGDSIEAQCGTSVNVHSSLR	D		Phospho (ST)	0.00000020000000000000000.0	21	110328_WaxPromix10ulA10_NH4OH80ACN.3970.3970.3.dta
2					5505	1	1	838.052	2511.14	3	2510.13	1.0091	63	85	0	27.12	24	46	4.4	K	LPGFGDSIEAQCGTSVNVHSSLR	D		Phospho (ST)	0.00000020000000000000000.0	19	110328_WaxPromix10ulA10_NH4OH80ACN.3756.3756.3.dta
2					5879	1	1	706.094	2820.35	4	2820.35	-0.0028	60	85	1	64.15	37	46	0.00095	R	FDKLPGFGDSIEAQCGTSVNVHSSLR	D				19	110328_WaxPromix10ulA10_NH4OH80ACN.2471.2471.4.dta
2					5880	1	1	706.095	2820.35	4	2820.35	0.0001	60	85	1	38.68	39	46	0.33	R	FDKLPGFGDSIEAQCGTSVNVHSSLR	D				24	110328_WaxPromix10ulA10_NH4OH80ACN.2548.2548.4.dta
2					5881	1	1	706.346	2821.35	4	2820.35	1.0039	60	85	1	50.46	36	46	0.021	R	FDKLPGFGDSIEAQCGTSVNVHSSLR	D				14	110328_WaxPromix10ulA10_NH4OH80ACN.2682.2682.4.dta
2					5913	1	1	726.085	2900.31	4	2900.32	-0.0073	60	85	1	22.18	32	47	17	R	FDKLPGFGDSIEAQCGTSVNVHSSLR	D		Phospho (ST)	0.00000000020000000000000000.0	18	110328_WaxPromix10ulA10_NH4OH80ACN.5893.5893.4.dta
2					5914	1	1	726.085	2900.31	4	2900.32	-0.006	60	85	1	25.18	32	47	8.6	R	FDKLPGFGDSIEAQCGTSVNVHSSLR	D		Phospho (ST)	0.00000000020000000000000000.0	22	110328_WaxPromix10ulA10_NH4OH80ACN.6837.6837.4.dta
2					5915	2	1	726.086	2900.31	4	2900.32	-0.0031	60	85	1	20.63	34	47	25	R	FDKLPGFGDSIEAQCGTSVNVHSSLR	D		Phospho (ST)	0.00000000020000000000000000.0	9	110328_WaxPromix10ulA10_NH4OH80ACN.4817.4817.4.dta
2					5916	1	1	726.086	2900.31	4	2900.32	-0.003	60	85	1	63.14	43	47	0.0014	R	FDKLPGFGDSIEAQCGTSVNVHSSLR	D		Phospho (ST)	0.00000000020000000000000000.0	22	110328_WaxPromix10ulA10_NH4OH80ACN.3577.3577.4.dta
2					5917	1	1	726.086	2900.31	4	2900.32	-0.002	60	85	1	33.81	31	47	1.2	R	FDKLPGFGDSIEAQCGTSVNVHSSLR	D		Phospho (ST)	0.00000000020000000000000000.0	14	110328_WaxPromix10ulA10_NH4OH80ACN.6790.6790.4.dta
2					5918	2	1	967.779	2900.31	3	2900.32	-0.0019	60	85	1	21.65	35	47	20	R	FDKLPGFGDSIEAQCGTSVNVHSSLR	D		Phospho (ST)	0.00000000000000000200000000.0	11	110328_WaxPromix10ulA10_NH4OH80ACN.4314.4314.3.dta
2					5919	1	1	967.779	2900.31	3	2900.32	-0.0017	60	85	1	27.87	28	47	4.7	R	FDKLPGFGDSIEAQCGTSVNVHSSLR	D		Phospho (ST)	0.00000000020000000000000000.0	14	110328_WaxPromix10ulA10_NH4OH80ACN.3935.3935.3.dta
2					5920	1	1	726.086	2900.32	4	2900.32	-0.0007	60	85	1	56.64		47	0.0063	R	FDKLPGFGDSIEAQCGTSVNVHSSLR	D		Phospho (ST)	0.00000000020000000000000000.0	20	110328_WaxPromix10ulA10_NH4OH80ACN.7069.7069.4.dta
2					5921	1	1	726.086	2900.32	4	2900.32	-0.0001	60	85	1	39.82	36	47	0.3	R	FDKLPGFGDSIEAQCGTSVNVHSSLR	D		Phospho (ST)	0.00000000020000000000000000.0	21	110328_WaxPromix10ulA10_NH4OH80ACN.4240.4240.4.dta
2					5922	1	1	726.086	2900.32	4	2900.32	-0.0001	60	85	1	33.07	37	47	1.4	R	FDKLPGFGDSIEAQCGTSVNVHSSLR	D		Phospho (ST)	0.00000000020000000000000000.0	12	110328_WaxPromix10ulA10_NH4OH80ACN.4043.4043.4.dta
2					5924	1	1	726.087	2900.32	4	2900.32	0.0003	60	85	1	25.37	31	47	8.3	R	FDKLPGFGDSIEAQCGTSVNVHSSLR	D		Phospho (ST)	0.00000000020000000000000000.0	17	110328_WaxPromix10ulA10_NH4OH80ACN.5042.5042.4.dta
2					5925	1	1	967.78	2900.32	3	2900.32	0.0007	60	85	1	35.6	27	47	0.79	R	FDKLPGFGDSIEAQCGTSVNVHSSLR	D		Phospho (ST)	0.00000000020000000000000000.0	19	110328_WaxPromix10ulA10_NH4OH80ACN.4024.4024.3.dta
2					5926	1	1	726.087	2900.32	4	2900.32	0.0009	60	85	1	43.66	33	47	0.12	R	FDKLPGFGDSIEAQCGTSVNVHSSLR	D		Phospho (ST)	0.00000000020000000000000000.0	27	110328_WaxPromix10ulA10_NH4OH80ACN.4192.4192.4.dta
2					5927	1	1	726.087	2900.32	4	2900.32	0.0011	60	85	1	29.07	32	47	3.5	R	FDKLPGFGDSIEAQCGTSVNVHSSLR	D		Phospho (ST)	0.00000000020000000000000000.0	22	110328_WaxPromix10ulA10_NH4OH80ACN.3426.3426.4.dta
2					5928	1	1	726.087	2900.32	4	2900.32	0.0013	60	85	1	45.63	32	47	0.078	R	FDKLPGFGDSIEAQCGTSVNVHSSLR	D		Phospho (ST)	0.00000000020000000000000000.0	21	110328_WaxPromix10ulA10_NH4OH80ACN.4088.4088.4.dta
2					5929	1	1	726.087	2900.32	4	2900.32	0.0015	60	85	1	49.6	32	47	0.032	R	FDKLPGFGDSIEAQCGTSVNVHSSLR	D		Phospho (ST)	0.00000000020000000000000000.0	19	110328_WaxPromix10ulA10_NH4OH80ACN.3668.3668.4.dta
2					5930	1	1	726.087	2900.32	4	2900.32	0.0016	60	85	1	39.49	32	47	0.33	R	FDKLPGFGDSIEAQCGTSVNVHSSLR	D		Phospho (ST)	0.00000000020000000000000000.0	29	110328_WaxPromix10ulA10_NH4OH80ACN.3903.3903.4.dta
2					5931	1	1	967.78	2900.32	3	2900.32	0.0017	60	85	1	43.11	29	47	0.14	R	FDKLPGFGDSIEAQCGTSVNVHSSLR	D		Phospho (ST)	0.00000000020000000000000000.0	16	110328_WaxPromix10ulA10_NH4OH80ACN.3822.3822.3.dta
2					5932	1	1	726.087	2900.32	4	2900.32	0.0017	60	85	1	54.75	41	47	0.0097	R	FDKLPGFGDSIEAQCGTSVNVHSSLR	D		Phospho (ST)	0.00000000020000000000000000.0	26	110328_WaxPromix10ulA10_NH4OH80ACN.3853.3853.4.dta
2					5933	1	1	726.087	2900.32	4	2900.32	0.0019	60	85	1	48.36	36	47	0.042	R	FDKLPGFGDSIEAQCGTSVNVHSSLR	D		Phospho (ST)	0.00000000020000000000000000.0	21	110328_WaxPromix10ulA10_NH4OH80ACN.3950.3950.4.dta
2					5934	1	1	726.087	2900.32	4	2900.32	0.0019	60	85	1	57.5	34	47	0.0051	R	FDKLPGFGDSIEAQCGTSVNVHSSLR	D		Phospho (ST)	0.00000000020000000000000000.0	22	110328_WaxPromix10ulA10_NH4OH80ACN.3623.3623.4.dta
2					5935	1	1	726.087	2900.32	4	2900.32	0.0019	60	85	1	46.18	36	47	0.069	R	FDKLPGFGDSIEAQCGTSVNVHSSLR	D		Phospho (ST)	0.00000000020000000000000000.0	21	110328_WaxPromix10ulA10_NH4OH80ACN.3998.3998.4.dta
2					5936	1	1	726.087	2900.32	4	2900.32	0.0021	60	85	1	43.06	32	47	0.14	R	FDKLPGFGDSIEAQCGTSVNVHSSLR	D		Phospho (ST)	0.00000000020000000000000000.0	14	110328_WaxPromix10ulA10_NH4OH80ACN.4874.4874.4.dta
2					5937	1	1	726.087	2900.32	4	2900.32	0.0022	60	85	1	35.47	44	47	0.81	R	FDKLPGFGDSIEAQCGTSVNVHSSLR	D		Phospho (ST)	0.00000000020000000000000000.0	20	110328_WaxPromix10ulA10_NH4OH80ACN.4504.4504.4.dta
2					5938	1	1	726.087	2900.32	4	2900.32	0.0026	60	85	1	22.04	34	47	18	R	FDKLPGFGDSIEAQCGTSVNVHSSLR	D		Phospho (ST)	0.00000000020000000000000000.0	14	110328_WaxPromix10ulA10_NH4OH80ACN.5822.5822.4.dta
2					5939	1	1	967.78	2900.32	3	2900.32	0.0028	60	85	1	55.93	31	47	0.0073	R	FDKLPGFGDSIEAQCGTSVNVHSSLR	D		Phospho (ST)	0.00000000020000000000000000.0	23	110328_WaxPromix10ulA10_NH4OH80ACN.3726.3726.3.dta
2					5940	1	1	726.087	2900.32	4	2900.32	0.0031	60	85	1	59.88	40	47	0.003	R	FDKLPGFGDSIEAQCGTSVNVHSSLR	D		Phospho (ST)	0.00000000020000000000000000.0	30	110328_WaxPromix10ulA10_NH4OH80ACN.3714.3714.4.dta
2					5941	1	1	726.087	2900.32	4	2900.32	0.0033	60	85	1	25.51	31	47	8.1	R	FDKLPGFGDSIEAQCGTSVNVHSSLR	D		Phospho (ST)	0.00000000020000000000000000.0	23	110328_WaxPromix10ulA10_NH4OH80ACN.4654.4654.4.dta
2					5942	1	1	726.087	2900.32	4	2900.32	0.0035	60	85	1	53.38	33	47	0.013	R	FDKLPGFGDSIEAQCGTSVNVHSSLR	D		Phospho (ST)	0.00000000020000000000000000.0	14	110328_WaxPromix10ulA10_NH4OH80ACN.3760.3760.4.dta
2					5943	1	1	726.087	2900.32	4	2900.32	0.0037	60	85	1	53.3	32	47	0.013	R	FDKLPGFGDSIEAQCGTSVNVHSSLR	D		Phospho (ST)	0.00000000020000000000000000.0	31	110328_WaxPromix10ulA10_NH4OH80ACN.3808.3808.4.dta
2					5944	1	1	726.087	2900.32	4	2900.32	0.0037	60	85	1	36.66	28	47	0.61	R	FDKLPGFGDSIEAQCGTSVNVHSSLR	D		Phospho (ST)	0.00000000020000000000000000.0	26	110328_WaxPromix10ulA10_NH4OH80ACN.4861.4861.4.dta
2					5945	1	1	967.781	2900.32	3	2900.32	0.0039	60	85	1	50.45	34	47	0.026	R	FDKLPGFGDSIEAQCGTSVNVHSSLR	D		Phospho (ST)	0.00000000020000000000000000.0	18	110328_WaxPromix10ulA10_NH4OH80ACN.3774.3774.3.dta
2					5946	1	1	726.087	2900.32	4	2900.32	0.004	60	85	1	61.29	34	47	0.0021	R	FDKLPGFGDSIEAQCGTSVNVHSSLR	D		Phospho (ST)	0.00000000020000000000000000.0	24	110328_WaxPromix10ulA10_NH4OH80ACN.3531.3531.4.dta
2					5947	1	1	726.087	2900.32	4	2900.32	0.0044	60	85	1	28.98	34	47	3.6	R	FDKLPGFGDSIEAQCGTSVNVHSSLR	D		Phospho (ST)	0.00000000020000000000000000.0	24	110328_WaxPromix10ulA10_NH4OH80ACN.4712.4712.4.dta
2					5948	1	1	726.087	2900.32	4	2900.32	0.0045	60	85	1	38.34	36	47	0.42	R	FDKLPGFGDSIEAQCGTSVNVHSSLR	D		Phospho (ST)	0.00000000020000000000000000.0	19	110328_WaxPromix10ulA10_NH4OH80ACN.4381.4381.4.dta
2					5949	1	1	726.087	2900.32	4	2900.32	0.0045	60	85	1	31.4	37	47	2.1	R	FDKLPGFGDSIEAQCGTSVNVHSSLR	D		Phospho (ST)	0.00000000020000000000000000.0	18	110328_WaxPromix10ulA10_NH4OH80ACN.6868.6868.4.dta
2					5950	1	1	726.087	2900.32	4	2900.32	0.0047	60	85	1	35.53	43	47	0.8	R	FDKLPGFGDSIEAQCGTSVNVHSSLR	D		Phospho (ST)	0.00000000020000000000000000.0	17	110328_WaxPromix10ulA10_NH4OH80ACN.4551.4551.4.dta
2					5951	1	1	726.088	2900.32	4	2900.32	0.0047	60	85	1	28.79	28	47	3.8	R	FDKLPGFGDSIEAQCGTSVNVHSSLR	D		Phospho (ST)	0.00000000020000000000000000.0	17	110328_WaxPromix10ulA10_NH4OH80ACN.4288.4288.4.dta
2					5952	1	1	726.088	2900.32	4	2900.32	0.0051	60	85	1	39.16	28	47	0.35	R	FDKLPGFGDSIEAQCGTSVNVHSSLR	D		Phospho (ST)	0.00000000020000000000000000.0	21	110328_WaxPromix10ulA10_NH4OH80ACN.4330.4330.4.dta
2					5953	1	1	726.088	2900.32	4	2900.32	0.0054	60	85	1	54.73	39	47	0.0095	R	FDKLPGFGDSIEAQCGTSVNVHSSLR	D		Phospho (ST)	0.00000000020000000000000000.0	25	110328_WaxPromix10ulA10_NH4OH80ACN.4142.4142.4.dta
2					5954	1	1	726.088	2900.32	4	2900.32	0.0059	60	85	1	44.37	34	47	0.1	R	FDKLPGFGDSIEAQCGTSVNVHSSLR	D		Phospho (ST)	0.00000000020000000000000000.0	25	110328_WaxPromix10ulA10_NH4OH80ACN.4429.4429.4.dta
2					5955	1	1	967.781	2900.32	3	2900.32	0.0061	60	85	1	67.32	35	47	0.00052	R	FDKLPGFGDSIEAQCGTSVNVHSSLR	D		Phospho (ST)	0.00000000020000000000000000.0	20	110328_WaxPromix10ulA10_NH4OH80ACN.3588.3588.3.dta
2					5957	1	1	967.782	2900.32	3	2900.32	0.0067	60	85	1	29.77	28	47	3	R	FDKLPGFGDSIEAQCGTSVNVHSSLR	D		Phospho (ST)	0.00000000020000000000000000.0	12	110328_WaxPromix10ulA10_NH4OH80ACN.4132.4132.3.dta
2					5958	1	1	726.088	2900.32	4	2900.32	0.0071	60	85	1	42.37	29	47	0.16	R	FDKLPGFGDSIEAQCGTSVNVHSSLR	D		Phospho (ST)	0.00000000020000000000000000.0	21	110328_WaxPromix10ulA10_NH4OH80ACN.4600.4600.4.dta
2					5960	1	1	726.088	2900.32	4	2900.32	0.0075	60	85	1	26.22	31	47	6.7	R	FDKLPGFGDSIEAQCGTSVNVHSSLR	D		Phospho (ST)	0.00000000020000000000000000.0	21	110328_WaxPromix10ulA10_NH4OH80ACN.4609.4609.4.dta
2					5961	1	1	967.782	2900.32	3	2900.32	0.0079	60	85	1	25.74	28	47	7.5	R	FDKLPGFGDSIEAQCGTSVNVHSSLR	D		Phospho (ST)	0.00000000020000000000000000.0	15	110328_WaxPromix10ulA10_NH4OH80ACN.3982.3982.3.dta
2					5962	1	1	726.088	2900.32	4	2900.32	0.0083	60	85	1	38.87	29	47	0.37	R	FDKLPGFGDSIEAQCGTSVNVHSSLR	D		Phospho (ST)	0.00000000020000000000000000.0	27	110328_WaxPromix10ulA10_NH4OH80ACN.4907.4907.4.dta
2					5963	1	1	967.782	2900.32	3	2900.32	0.0085	60	85	1	44.59	30	47	0.097	R	FDKLPGFGDSIEAQCGTSVNVHSSLR	D		Phospho (ST)	0.00000000020000000000000000.0	20	110328_WaxPromix10ulA10_NH4OH80ACN.3525.3525.3.dta
2					5964	1	1	726.088	2900.32	4	2900.32	0.0086	60	85	1	30.3	33	47	2.6	R	FDKLPGFGDSIEAQCGTSVNVHSSLR	D		Phospho (ST)	0.00000000020000000000000000.0	22	110328_WaxPromix10ulA10_NH4OH80ACN.4991.4991.4.dta
2					5965	1	1	967.782	2900.33	3	2900.32	0.009	60	85	1	43.2	36	47	0.14	R	FDKLPGFGDSIEAQCGTSVNVHSSLR	D		Phospho (ST)	0.00000000020000000000000000.0	24	110328_WaxPromix10ulA10_NH4OH80ACN.3856.3856.3.dta
2					5966	1	1	726.089	2900.33	4	2900.32	0.0091	60	85	1	38.59	35	47	0.39	R	FDKLPGFGDSIEAQCGTSVNVHSSLR	D		Phospho (ST)	0.00000000020000000000000000.0	20	110328_WaxPromix10ulA10_NH4OH80ACN.4454.4454.4.dta
2					5967	1	1	726.089	2900.33	4	2900.32	0.0092	60	85	1	29.47	28	47	3.2	R	FDKLPGFGDSIEAQCGTSVNVHSSLR	D		Phospho (ST)	0.00000000020000000000000000.0	15	110328_WaxPromix10ulA10_NH4OH80ACN.4771.4771.4.dta
2					5968	1	1	967.783	2900.33	3	2900.32	0.0093	60	85	1	66.87	33	47	0.00058	R	FDKLPGFGDSIEAQCGTSVNVHSSLR	D		Phospho (ST)	0.00000000020000000000000000.0	24	110328_WaxPromix10ulA10_NH4OH80ACN.3635.3635.3.dta
2					5969	1	1	967.783	2900.33	3	2900.32	0.0107	60	85	1	56.46	31	47	0.0064	R	FDKLPGFGDSIEAQCGTSVNVHSSLR	D		Phospho (ST)	0.00000000020000000000000000.0	25	110328_WaxPromix10ulA10_NH4OH80ACN.3543.3543.3.dta
2					5970	1	1	967.783	2900.33	3	2900.32	0.0114	60	85	1	58.7	29	47	0.0038	R	FDKLPGFGDSIEAQCGTSVNVHSSLR	D		Phospho (ST)	0.00000000020000000000000000.0	26	110328_WaxPromix10ulA10_NH4OH80ACN.3680.3680.3.dta
2					5971	1	1	967.784	2900.33	3	2900.32	0.0129	60	85	1	28.18	28	47	4.3	R	FDKLPGFGDSIEAQCGTSVNVHSSLR	D		Phospho (ST)	0.00000000020000000000000000.0	17	110328_WaxPromix10ulA10_NH4OH80ACN.4069.4069.3.dta
2					5974	1	1	726.335	2901.31	4	2901.3	0.0112	60	85	1	44.83		47	0.094	R	FDKLPGFGDSIEAQCGTSVNVHSSLR	D		Phospho (ST); Deamidated (NQ)	0.00000000020000000004000000.0	27	110328_WaxPromix10ulA10_NH4OH80ACN.4965.4965.4.dta
2					5975	1	1	726.336	2901.31	4	2901.3	0.0126	60	85	1	21	30	47	23	R	FDKLPGFGDSIEAQCGTSVNVHSSLR	D		Phospho (ST); Deamidated (NQ)	0.00000000020000000004000000.0	28	110328_WaxPromix10ulA10_NH4OH80ACN.5857.5857.4.dta
2					5977	1	1	968.113	2901.32	3	2900.32	0.9999	60	85	1	25.71	31	47	7.7	R	FDKLPGFGDSIEAQCGTSVNVHSSLR	D		Phospho (ST)	0.00000000020000000000000000.0	16	110328_WaxPromix10ulA10_NH4OH80ACN.4870.4870.3.dta
2					5978	1	1	726.337	2901.32	4	2900.32	1.0005	60	85	1	25.04	36	47	8.9	R	FDKLPGFGDSIEAQCGTSVNVHSSLR	D		Phospho (ST)	0.00000000020000000000000000.0	20	110328_WaxPromix10ulA10_NH4OH80ACN.6738.6738.4.dta
2					5979	1	1	726.337	2901.32	4	2900.32	1.0015	60	85	1	20.18	32	47	27	R	FDKLPGFGDSIEAQCGTSVNVHSSLR	D		Phospho (ST)	0.00000000020000000000000000.0	19	110328_WaxPromix10ulA10_NH4OH80ACN.6715.6715.4.dta
2					5981	1	1	726.337	2901.32	4	2900.32	1.0026	60	85	1	36.23	34	47	0.68	R	FDKLPGFGDSIEAQCGTSVNVHSSLR	D		Phospho (ST)	0.00000000020000000000000000.0	15	110328_WaxPromix10ulA10_NH4OH80ACN.6846.6846.4.dta
2					5984	1	1	968.114	2901.32	3	2900.32	1.0038	60	85	1	24.25	30	47	10	R	FDKLPGFGDSIEAQCGTSVNVHSSLR	D		Phospho (ST)	0.00000000020000000000000000.0	16	110328_WaxPromix10ulA10_NH4OH80ACN.4170.4170.3.dta
2					5985	1	1	726.337	2901.32	4	2900.32	1.0045	60	85	1	26.02	35	47	7	R	FDKLPGFGDSIEAQCGTSVNVHSSLR	D		Phospho (ST)	0.00000000020000000000000000.0	22	110328_WaxPromix10ulA10_NH4OH80ACN.6804.6804.4.dta
2					5986	1	1	726.338	2901.32	4	2900.32	1.0049	60	85	1	31.26	33	47	2.1	R	FDKLPGFGDSIEAQCGTSVNVHSSLR	D		Phospho (ST)	0.00000000020000000000000000.0	26	110328_WaxPromix10ulA10_NH4OH80ACN.5915.5915.4.dta
2					5987	1	1	726.338	2901.32	4	2900.32	1.005	60	85	1	33.45	29	47	1.3	R	FDKLPGFGDSIEAQCGTSVNVHSSLR	D		Phospho (ST)	0.00000000020000000000000000.0	34	110328_WaxPromix10ulA10_NH4OH80ACN.5981.5981.4.dta
2					5988	1	1	726.338	2901.32	4	2900.32	1.0074	60	85	1	34.93	38	47	0.9	R	FDKLPGFGDSIEAQCGTSVNVHSSLR	D		Phospho (ST)	0.00000000020000000000000000.0	25	110328_WaxPromix10ulA10_NH4OH80ACN.5697.5697.4.dta
2					5989	1	1	726.339	2901.33	4	2900.32	1.0095	60	85	1	24.66	33	47	9.5	R	FDKLPGFGDSIEAQCGTSVNVHSSLR	D		Phospho (ST)	0.00000000020000000000000000.0	19	110328_WaxPromix10ulA10_NH4OH80ACN.5704.5704.4.dta
2					5990	1	1	726.339	2901.33	4	2900.32	1.0108	60	85	1	46.73	32	47	0.059	R	FDKLPGFGDSIEAQCGTSVNVHSSLR	D		Phospho (ST)	0.00000000020000000000000000.0	27	110328_WaxPromix10ulA10_NH4OH80ACN.6922.6922.4.dta
2					5992	1	1	726.339	2901.33	4	2900.32	1.0119	60	85	1	35.73	35	47	0.74	R	FDKLPGFGDSIEAQCGTSVNVHSSLR	D		Phospho (ST)	0.00000000020000000000000000.0	18	110328_WaxPromix10ulA10_NH4OH80ACN.5637.5637.4.dta
2					5995	1	1	726.576	2902.28	4	2902.28	-0.0089	60	85	1	36.52	29	47	0.63	R	FDKLPGFGDSIEAQCGTSVNVHSSLR	D		Phospho (ST); 2 Deamidated (NQ)	0.00000000020004000004000000.0	25	110328_WaxPromix10ulA10_NH4OH80ACN.5464.5464.4.dta
2					5996	1	1	726.587	2902.32	4	2900.32	2.0025	60	85	1	30.59	36	47	2.4	R	FDKLPGFGDSIEAQCGTSVNVHSSLR	D		Phospho (ST)	0.00000000020000000000000000.0	19	110328_WaxPromix10ulA10_NH4OH80ACN.6257.6257.4.dta
2					5998	1	1	726.588	2902.32	4	2900.32	2.0054	60	85	1	30.63	32	47	2.4	R	FDKLPGFGDSIEAQCGTSVNVHSSLR	D		Phospho (ST)	0.00000000020000000000000000.0	19	110328_WaxPromix10ulA10_NH4OH80ACN.5792.5792.4.dta
2					5999	1	1	726.591	2902.33	4	2900.32	2.0168	60	85	1	21.3	31	47	21	R	FDKLPGFGDSIEAQCGTSVNVHSSLR	D		Phospho (ST)	0.00000000020000000000000000.0	16	110328_WaxPromix10ulA10_NH4OH80ACN.5660.5660.4.dta
2					6072	1	1	759.133	3032.5	4	3032.51	-0.0066	21	47	0	27.68	28	45	3.3	K	VHHANENIFYCPIAIMSALAMVYLGAK	D				19	110328_WaxPromix10ulA10_NH4OH80ACN.2685.2685.4.dta
2					6073	1	1	1011.84	3032.5	3	3032.51	-0.0037	21	47	0	98.92	34	45	2.4e-07	K	VHHANENIFYCPIAIMSALAMVYLGAK	D				16	110328_WaxPromix10ulA10_NH4OH80ACN.1783.1783.3.dta
2					6074	1	1	1011.84	3032.51	3	3032.51	-0.0024	21	47	0	93.22	33	45	9e-07	K	VHHANENIFYCPIAIMSALAMVYLGAK	D				16	110328_WaxPromix10ulA10_NH4OH80ACN.1677.1677.3.dta
2					6075	1	1	759.134	3032.51	4	3032.51	-0.0023	21	47	0	30.47	30	45	1.7	K	VHHANENIFYCPIAIMSALAMVYLGAK	D				11	110328_WaxPromix10ulA10_NH4OH80ACN.2539.2539.4.dta
2					6076	1	1	759.134	3032.51	4	3032.51	-0.001	21	47	0	48.45	31	45	0.027	K	VHHANENIFYCPIAIMSALAMVYLGAK	D				15	110328_WaxPromix10ulA10_NH4OH80ACN.1904.1904.4.dta
2					6077	1	1	1011.84	3032.51	3	3032.51	0	21	47	0	76.08	33	45	4.5e-05	K	VHHANENIFYCPIAIMSALAMVYLGAK	D				16	110328_WaxPromix10ulA10_NH4OH80ACN.2156.2156.3.dta
2					6078	1	1	759.134	3032.51	4	3032.51	0.0008	21	47	0	54.98	31	45	0.0059	K	VHHANENIFYCPIAIMSALAMVYLGAK	D				14	110328_WaxPromix10ulA10_NH4OH80ACN.7096.7096.4.dta
2					6080	1	1	1011.84	3032.51	3	3032.51	0.0013	21	47	0	91.96	35	45	1.2e-06	K	VHHANENIFYCPIAIMSALAMVYLGAK	D				15	110328_WaxPromix10ulA10_NH4OH80ACN.1839.1839.3.dta
2					6081	1	1	759.135	3032.51	4	3032.51	0.0018	21	47	0	21.23	27	45	14	K	VHHANENIFYCPIAIMSALAMVYLGAK	D				9	110328_WaxPromix10ulA10_NH4OH80ACN.3906.3906.4.dta
2					6082	1	1	759.135	3032.51	4	3032.51	0.0022	21	47	0	49.02	28	45	0.023	K	VHHANENIFYCPIAIMSALAMVYLGAK	D				24	110328_WaxPromix10ulA10_NH4OH80ACN.1848.1848.4.dta
2					6083	1	1	1011.84	3032.51	3	3032.51	0.0029	21	47	0	81.49	33	45	1.3e-05	K	VHHANENIFYCPIAIMSALAMVYLGAK	D				15	110328_WaxPromix10ulA10_NH4OH80ACN.1894.1894.3.dta
2					6084	1	1	759.135	3032.51	4	3032.51	0.0036	21	47	0	41.57	37	45	0.12	K	VHHANENIFYCPIAIMSALAMVYLGAK	D				17	110328_WaxPromix10ulA10_NH4OH80ACN.2182.2182.4.dta
2					6086	1	1	759.135	3032.51	4	3032.51	0.0039	21	47	0	45.9	29	45	0.046	K	VHHANENIFYCPIAIMSALAMVYLGAK	D				20	110328_WaxPromix10ulA10_NH4OH80ACN.1792.1792.4.dta
2					6087	1	1	759.135	3032.51	4	3032.51	0.0044	21	47	0	32.91	31	45	0.91	K	VHHANENIFYCPIAIMSALAMVYLGAK	D				18	110328_WaxPromix10ulA10_NH4OH80ACN.3149.3149.4.dta
2					6088	1	1	759.135	3032.51	4	3032.51	0.0045	21	47	0	20.78	26	45	15	K	VHHANENIFYCPIAIMSALAMVYLGAK	D				16	110328_WaxPromix10ulA10_NH4OH80ACN.4869.4869.4.dta
2					6089	1	1	759.135	3032.51	4	3032.51	0.0057	21	47	0	38.85	36	45	0.23	K	VHHANENIFYCPIAIMSALAMVYLGAK	D				15	110328_WaxPromix10ulA10_NH4OH80ACN.1736.1736.4.dta
2					6090	1	1	759.136	3032.51	4	3032.51	0.0058	21	47	0	36.51	27	45	0.4	K	VHHANENIFYCPIAIMSALAMVYLGAK	D				25	110328_WaxPromix10ulA10_NH4OH80ACN.2071.2071.4.dta
2					6091	1	1	759.136	3032.51	4	3032.51	0.0058	21	47	0	44.87	30	45	0.058	K	VHHANENIFYCPIAIMSALAMVYLGAK	D				16	110328_WaxPromix10ulA10_NH4OH80ACN.2015.2015.4.dta
2					6092	1	1	759.136	3032.51	4	3032.51	0.0061	21	47	0	49.88	28	45	0.018	K	VHHANENIFYCPIAIMSALAMVYLGAK	D				17	110328_WaxPromix10ulA10_NH4OH80ACN.2126.2126.4.dta
2					6094	1	1	759.136	3032.51	4	3032.51	0.0068	21	47	0	51.86	26	45	0.011	K	VHHANENIFYCPIAIMSALAMVYLGAK	D				13	110328_WaxPromix10ulA10_NH4OH80ACN.1960.1960.4.dta
2					6095	1	1	1011.85	3032.51	3	3032.51	0.0071	21	47	0	94.42	36	45	6.4e-07	K	VHHANENIFYCPIAIMSALAMVYLGAK	D				15	110328_WaxPromix10ulA10_NH4OH80ACN.1962.1962.3.dta
2					6097	1	1	759.137	3032.52	4	3032.51	0.0119	21	47	0	31.08	25	45	1.3	K	VHHANENIFYCPIAIMSALAMVYLGAK	D				15	110328_WaxPromix10ulA10_NH4OH80ACN.4280.4280.4.dta
2					6098	1	1	1011.85	3032.52	3	3032.51	0.012	21	47	0	83.47	35	45	7.6e-06	K	VHHANENIFYCPIAIMSALAMVYLGAK	D				16	110328_WaxPromix10ulA10_NH4OH80ACN.2074.2074.3.dta
2					6099	1	1	1011.85	3032.52	3	3032.51	0.0126	21	47	0	93.21	33	45	8e-07	K	VHHANENIFYCPIAIMSALAMVYLGAK	D				18	110328_WaxPromix10ulA10_NH4OH80ACN.1985.1985.3.dta
2					6100	1	1	1011.85	3032.52	3	3032.51	0.0145	21	47	0	105.69	35	45	4.5e-08	K	VHHANENIFYCPIAIMSALAMVYLGAK	D				18	110328_WaxPromix10ulA10_NH4OH80ACN.1703.1703.3.dta
2					6103	1	1	759.383	3033.5	4	3033.49	0.0132	21	47	0	47.09		45	0.037	K	VHHANENIFYCPIAIMSALAMVYLGAK	D		Deamidated (NQ)	0.000040000000000000000000000.0	13	110328_WaxPromix10ulA10_NH4OH80ACN.5005.5005.4.dta
2					6104	1	1	759.384	3033.51	4	3033.49	0.0136	21	47	0	53.7		45	0.008	K	VHHANENIFYCPIAIMSALAMVYLGAK	D		Deamidated (NQ)	0.000000400000000000000000000.0	13	110328_WaxPromix10ulA10_NH4OH80ACN.2718.2718.4.dta
2					6105	1	1	759.384	3033.51	4	3033.49	0.0139	21	47	0	45.95	39	45	0.048	K	VHHANENIFYCPIAIMSALAMVYLGAK	D		Deamidated (NQ)	0.000040000000000000000000000.0	14	110328_WaxPromix10ulA10_NH4OH80ACN.3979.3979.4.dta
2					6107	1	1	759.384	3033.51	4	3032.51	1.0004	21	47	0	28.48	32	45	2.6	K	VHHANENIFYCPIAIMSALAMVYLGAK	D				19	110328_WaxPromix10ulA10_NH4OH80ACN.3958.3958.4.dta
2					6108	1	1	759.384	3033.51	4	3032.51	1.0011	21	47	0	35.02	37	45	0.57	K	VHHANENIFYCPIAIMSALAMVYLGAK	D				12	110328_WaxPromix10ulA10_NH4OH80ACN.3740.3740.4.dta
2					6109	1	1	759.385	3033.51	4	3032.51	1.005	21	47	0	31.52	25	45	1.3	K	VHHANENIFYCPIAIMSALAMVYLGAK	D				16	110328_WaxPromix10ulA10_NH4OH80ACN.2995.2995.4.dta
2					6110	1	1	759.386	3033.51	4	3032.51	1.0058	21	47	0	25.16	27	45	5.5	K	VHHANENIFYCPIAIMSALAMVYLGAK	D				23	110328_WaxPromix10ulA10_NH4OH80ACN.2573.2573.4.dta
2					6113	1	1	759.386	3033.51	4	3032.51	1.0068	21	47	0	25.58	23	45	4.9	K	VHHANENIFYCPIAIMSALAMVYLGAK	D				19	110328_WaxPromix10ulA10_NH4OH80ACN.3283.3283.4.dta
2					6114	1	1	759.386	3033.51	4	3032.51	1.0068	21	47	0	27.81	29	45	2.9	K	VHHANENIFYCPIAIMSALAMVYLGAK	D				14	110328_WaxPromix10ulA10_NH4OH80ACN.2659.2659.4.dta
2					6115	1	1	1012.18	3033.51	3	3032.51	1.0075	21	47	0	95.89	32	45	4.5e-07	K	VHHANENIFYCPIAIMSALAMVYLGAK	D				16	110328_WaxPromix10ulA10_NH4OH80ACN.2119.2119.3.dta
2					6116	1	1	759.386	3033.51	4	3032.51	1.0076	21	47	0	21.1	32	45	14	K	VHHANENIFYCPIAIMSALAMVYLGAK	D				15	110328_WaxPromix10ulA10_NH4OH80ACN.3552.3552.4.dta
2					6117	1	1	759.386	3033.52	4	3032.51	1.009	21	47	0	24.64	24	45	5.9	K	VHHANENIFYCPIAIMSALAMVYLGAK	D				11	110328_WaxPromix10ulA10_NH4OH80ACN.4082.4082.4.dta
2					6118	1	1	759.387	3033.52	4	3032.51	1.0107	21	47	0	22.96	32	45	8.6	K	VHHANENIFYCPIAIMSALAMVYLGAK	D				16	110328_WaxPromix10ulA10_NH4OH80ACN.2784.2784.4.dta
2					6119	1	1	1012.18	3033.52	3	3032.51	1.0114	21	47	0	88.55	31	45	2.4e-06	K	VHHANENIFYCPIAIMSALAMVYLGAK	D				17	110328_WaxPromix10ulA10_NH4OH80ACN.2064.2064.3.dta
2					6120	1	1	1012.18	3033.52	3	3032.51	1.0145	21	47	0	99.31	35	45	1.9e-07	K	VHHANENIFYCPIAIMSALAMVYLGAK	D				16	110328_WaxPromix10ulA10_NH4OH80ACN.2175.2175.3.dta
2					6121	1	1	759.388	3033.52	4	3032.51	1.0153	21	47	0	46.24	29	45	0.039	K	VHHANENIFYCPIAIMSALAMVYLGAK	D				12	110328_WaxPromix10ulA10_NH4OH80ACN.3604.3604.4.dta
2					6123	1	1	759.636	3034.52	4	3032.51	2.0081	21	47	0	29.75	31	45	1.8	K	VHHANENIFYCPIAIMSALAMVYLGAK	D				13	110328_WaxPromix10ulA10_NH4OH80ACN.4798.4798.4.dta
2					6435	1	1	966.513	3862.02	4	3862	0.0178	230	264	0	49.11	36	41	0.008	K	ILELPFASGTMSMLVLLPDEVSGLEQLESIINFEK	L				35	110328_WaxPromix10ulA10_NH4OH80ACN.2596.2596.4.dta
2					6437	1	1	966.759	3863.01	4	3862	1.0044	230	264	0	35.09	39	41	0.23	K	ILELPFASGTMSMLVLLPDEVSGLEQLESIINFEK	L				6	110328_WaxPromix10ulA10_NH4OH80ACN.2584.2584.4.dta
2					6438	1	1	966.76	3863.01	4	3862	1.0064	230	264	0	32.97	38	41	0.37	K	ILELPFASGTMSMLVLLPDEVSGLEQLESIINFEK	L				16	110328_WaxPromix10ulA10_NH4OH80ACN.2601.2601.4.dta	emPAI	13.21
3	ALBU_SHEEP	Serum albumin OS=Ovis aries GN=ALB PE=2 SV=1	6890	71139	427	1	0	660.355	659.348	1	659.349	-0.0013	490	495	0	31.61	37	38	0.25	K	TPVSEK	V				6	110328_WaxPromix10ulA10_NH4OH80ACN.2029.2029.1.dta
3					428	1	0	660.356	659.348	1	659.349	-0.0005	490	495	0	25.95	29	39	1.1	K	TPVSEK	V				7	110328_WaxPromix10ulA10_NH4OH80ACN.2093.2093.1.dta
3					429	1	0	660.357	659.35	1	659.349	0.0005	490	495	0	28.86	29	39	0.58	K	TPVSEK	V				7	110328_WaxPromix10ulA10_NH4OH80ACN.1982.1982.1.dta
3					470	1	0	689.371	688.364	1	688.366	-0.0018	236	241	0	20.41	32	37	2.3	K	AWSVAR	L				3	110328_WaxPromix10ulA10_NH4OH80ACN.557.557.1.dta
3					471	1	0	689.371	688.364	1	688.366	-0.0017	236	241	0	23.46	33	37	1.1	K	AWSVAR	L				3	110328_WaxPromix10ulA10_NH4OH80ACN.897.897.1.dta
3					473	1	0	689.372	688.364	1	688.366	-0.0014	236	241	0	20.28	31	37	2.4	K	AWSVAR	L				3	110328_WaxPromix10ulA10_NH4OH80ACN.601.601.1.dta
3					474	1	0	689.372	688.364	1	688.366	-0.0013	236	241	0	20.2	31	37	2.4	K	AWSVAR	L				3	110328_WaxPromix10ulA10_NH4OH80ACN.644.644.1.dta
3					476	1	0	689.372	688.365	1	688.366	-0.0009	236	241	0	20.55	32	37	2.2	K	AWSVAR	L				3	110328_WaxPromix10ulA10_NH4OH80ACN.687.687.1.dta
3					497	1	0	353.68	705.346	2	705.348	-0.0019	223	228	0	36.37		39	0.1	R	CASIQK	F				5	110328_WaxPromix10ulA10_NH4OH80ACN.1312.1312.2.dta
3					498	2	0	353.68	705.346	2	705.348	-0.0018	223	228	0	39.46		39	0.052	R	CASIQK	F				5	110328_WaxPromix10ulA10_NH4OH80ACN.1475.1475.2.dta
3					499	3	0	353.68	705.346	2	705.348	-0.0018	223	228	0	39.43		39	0.052	R	CASIQK	F				5	110328_WaxPromix10ulA10_NH4OH80ACN.1527.1527.2.dta
3					500	2	0	353.68	705.346	2	705.348	-0.0018	223	228	0	24.68		39	1.5	R	CASIQK	F				5	110328_WaxPromix10ulA10_NH4OH80ACN.1629.1629.2.dta
3					501	3	0	353.68	705.346	2	705.348	-0.0017	223	228	0	33.11		39	0.22	R	CASIQK	F				5	110328_WaxPromix10ulA10_NH4OH80ACN.1421.1421.2.dta
3					502	1	0	706.354	705.346	1	705.348	-0.0016	223	228	0	27.39	34	39	0.83	R	CASIQK	F				4	110328_WaxPromix10ulA10_NH4OH80ACN.1390.1390.1.dta
3					504	1	0	706.354	705.346	1	705.348	-0.0014	223	228	0	24.58	31	39	1.6	R	CASIQK	F				4	110328_WaxPromix10ulA10_NH4OH80ACN.1442.1442.1.dta
3					505	2	0	353.68	705.346	2	705.348	-0.0014	223	228	0	41.74		39	0.03	R	CASIQK	F				5	110328_WaxPromix10ulA10_NH4OH80ACN.1368.1368.2.dta
3					506	2	0	353.681	705.347	2	705.348	-0.0013	223	228	0	44.02		39	0.018	R	CASIQK	F				5	110328_WaxPromix10ulA10_NH4OH80ACN.1583.1583.2.dta
3					507	2	0	353.681	705.347	2	705.348	-0.0013	223	228	0	29.22		39	0.54	R	CASIQK	F				4	110328_WaxPromix10ulA10_NH4OH80ACN.1857.1857.2.dta
3					508	1	0	706.354	705.347	1	705.348	-0.0012	223	228	0	31.59	34	39	0.33	R	CASIQK	F				5	110328_WaxPromix10ulA10_NH4OH80ACN.1337.1337.1.dta
3					509	3	0	353.681	705.347	2	705.348	-0.0012	223	228	0	32.53		39	0.27	R	CASIQK	F				4	110328_WaxPromix10ulA10_NH4OH80ACN.1263.1263.2.dta
3					510	3	0	353.681	705.347	2	705.348	-0.0011	223	228	0	24.15	35	39	1.8	R	CASIQK	F				5	110328_WaxPromix10ulA10_NH4OH80ACN.1684.1684.2.dta
3					511	1	0	706.354	705.347	1	705.348	-0.001	223	228	0	22.84	31	39	2.5	R	CASIQK	F				4	110328_WaxPromix10ulA10_NH4OH80ACN.1282.1282.1.dta
3					513	1	0	706.354	705.347	1	705.348	-0.0009	223	228	0	27.59	30	39	0.83	R	CASIQK	F				4	110328_WaxPromix10ulA10_NH4OH80ACN.1494.1494.1.dta
3					514	1	0	353.681	705.347	2	705.348	-0.0008	223	228	0	27.03	38	39	0.95	R	CASIQK	F				5	110328_WaxPromix10ulA10_NH4OH80ACN.1740.1740.2.dta
3					519	1	0	356.69	711.365	2	711.366	-0.0015	29	34	0	31.76	34	36	0.16	K	SEIAHR	F				5	110328_WaxPromix10ulA10_NH4OH80ACN.1817.1817.2.dta
3					520	1	0	356.69	711.365	2	711.366	-0.0012	29	34	0	30.23	33	36	0.23	K	SEIAHR	F				5	110328_WaxPromix10ulA10_NH4OH80ACN.1874.1874.2.dta
3					521	1	0	356.69	711.365	2	711.366	-0.0011	29	34	0	26.82	33	36	0.5	K	SEIAHR	F				5	110328_WaxPromix10ulA10_NH4OH80ACN.1933.1933.2.dta
3					522	1	0	356.69	711.366	2	711.366	-0.0006	29	34	0	30.19	33	36	0.23	K	SEIAHR	F				5	110328_WaxPromix10ulA10_NH4OH80ACN.1764.1764.2.dta
3					623	1	0	376.682	751.349	2	751.35	-0.0014	341	346	0	38.2		37	0.04	K	NYQEAK	D				5	110328_WaxPromix10ulA10_NH4OH80ACN.2395.2395.2.dta
3					624	1	0	376.682	751.349	2	751.35	-0.0012	341	346	0	38.09		37	0.041	K	NYQEAK	D				5	110328_WaxPromix10ulA10_NH4OH80ACN.2335.2335.2.dta
3					625	1	0	376.682	751.349	2	751.35	-0.001	341	346	0	37.7		37	0.045	K	NYQEAK	D				5	110328_WaxPromix10ulA10_NH4OH80ACN.2282.2282.2.dta
3					626	1	0	752.357	751.35	1	751.35	-0.0004	341	346	0	27.29	24	37	0.58	K	NYQEAK	D				7	110328_WaxPromix10ulA10_NH4OH80ACN.2336.2336.1.dta
3					627	1	0	752.357	751.35	1	751.35	-0.0004	341	346	0	27.33	23	37	0.58	K	NYQEAK	D				7	110328_WaxPromix10ulA10_NH4OH80ACN.2396.2396.1.dta
3					628	1	0	752.358	751.35	1	751.35	0.0003	341	346	0	23.65	27	37	1.3	K	NYQEAK	D				6	110328_WaxPromix10ulA10_NH4OH80ACN.2283.2283.1.dta
3					631	2	0	377.174	752.333	2	752.334	-0.0011	341	346	0	35.25		36	0.069	K	NYQEAK	D		Deamidated (NQ)	0.400000.0	5	110328_WaxPromix10ulA10_NH4OH80ACN.4084.4084.2.dta
3					632	1	0	377.174	752.333	2	752.334	-0.0008	341	346	0	40.74		36	0.02	K	NYQEAK	D		Deamidated (NQ)	0.400000.0	5	110328_WaxPromix10ulA10_NH4OH80ACN.4128.4128.2.dta
3					653	1	0	758.42	757.412	1	757.416	-0.0033	198	204	0	31.09	29	31	0.06	K	GACLLPK	I				4	110328_WaxPromix10ulA10_NH4OH80ACN.499.499.1.dta
3					654	1	0	758.42	757.412	1	757.416	-0.0032	198	204	0	28.58	28	31	0.11	K	GACLLPK	I				4	110328_WaxPromix10ulA10_NH4OH80ACN.543.543.1.dta
3					655	1	0	379.714	757.413	2	757.416	-0.003	198	204	0	35.77		35	0.048	K	GACLLPK	I				5	110328_WaxPromix10ulA10_NH4OH80ACN.542.542.2.dta
3					656	1	0	379.714	757.413	2	757.416	-0.003	198	204	0	32.55		35	0.1	K	GACLLPK	I				5	110328_WaxPromix10ulA10_NH4OH80ACN.498.498.2.dta
3					657	1	0	379.714	757.413	2	757.416	-0.0027	198	204	0	38.23		35	0.027	K	GACLLPK	I				8	110328_WaxPromix10ulA10_NH4OH80ACN.409.409.2.dta
3					658	1	0	758.42	757.413	1	757.416	-0.0027	198	204	0	30.91	29	35	0.15	K	GACLLPK	I				4	110328_WaxPromix10ulA10_NH4OH80ACN.411.411.1.dta
3					659	1	0	379.714	757.413	2	757.416	-0.0024	198	204	0	35.45		35	0.052	K	GACLLPK	I				8	110328_WaxPromix10ulA10_NH4OH80ACN.586.586.2.dta
3					660	1	0	379.714	757.413	2	757.416	-0.0024	198	204	0	35.41		35	0.052	K	GACLLPK	I				8	110328_WaxPromix10ulA10_NH4OH80ACN.454.454.2.dta
3					661	1	0	379.714	757.413	2	757.416	-0.0023	198	204	0	38.08		35	0.028	K	GACLLPK	I				8	110328_WaxPromix10ulA10_NH4OH80ACN.630.630.2.dta
3					662	1	0	379.714	757.413	2	757.416	-0.0022	198	204	0	33.85		35	0.075	K	GACLLPK	I				8	110328_WaxPromix10ulA10_NH4OH80ACN.806.806.2.dta
3					663	1	0	758.421	757.413	1	757.416	-0.0022	198	204	0	28.68	28	35	0.25	K	GACLLPK	I				4	110328_WaxPromix10ulA10_NH4OH80ACN.587.587.1.dta
3					664	1	0	758.421	757.413	1	757.416	-0.0021	198	204	0	28.49	27	35	0.26	K	GACLLPK	I				4	110328_WaxPromix10ulA10_NH4OH80ACN.455.455.1.dta
3					665	1	0	379.714	757.414	2	757.416	-0.002	198	204	0	30.97		35	0.14	K	GACLLPK	I				4	110328_WaxPromix10ulA10_NH4OH80ACN.849.849.2.dta
3					666	1	0	379.714	757.414	2	757.416	-0.002	198	204	0	38.02		35	0.029	K	GACLLPK	I				8	110328_WaxPromix10ulA10_NH4OH80ACN.365.365.2.dta
3					667	1	0	758.421	757.414	1	757.416	-0.002	198	204	0	27.3	27	35	0.34	K	GACLLPK	I				8	110328_WaxPromix10ulA10_NH4OH80ACN.631.631.1.dta
3					668	1	0	379.714	757.414	2	757.416	-0.002	198	204	0	37.98		35	0.029	K	GACLLPK	I				8	110328_WaxPromix10ulA10_NH4OH80ACN.892.892.2.dta
3					669	1	0	379.714	757.414	2	757.416	-0.0019	198	204	0	31.38		35	0.13	K	GACLLPK	I				8	110328_WaxPromix10ulA10_NH4OH80ACN.763.763.2.dta
3					670	1	0	379.714	757.414	2	757.416	-0.0019	198	204	0	30.23		35	0.17	K	GACLLPK	I				5	110328_WaxPromix10ulA10_NH4OH80ACN.1449.1449.2.dta
3					671	1	0	379.714	757.414	2	757.416	-0.0019	198	204	0	30.41		35	0.15	K	GACLLPK	I				4	110328_WaxPromix10ulA10_NH4OH80ACN.674.674.2.dta
3					672	1	0	379.714	757.414	2	757.416	-0.0017	198	204	0	34.24		35	0.064	K	GACLLPK	I				6	110328_WaxPromix10ulA10_NH4OH80ACN.719.719.2.dta
3					673	1	0	379.714	757.414	2	757.416	-0.0017	198	204	0	31.57		35	0.12	K	GACLLPK	I				6	110328_WaxPromix10ulA10_NH4OH80ACN.1281.1281.2.dta
3					674	1	0	379.714	757.414	2	757.416	-0.0015	198	204	0	26.91		35	0.37	K	GACLLPK	I				4	110328_WaxPromix10ulA10_NH4OH80ACN.936.936.2.dta
3					675	1	0	758.421	757.414	1	757.416	-0.0015	198	204	0	31.14	29	35	0.14	K	GACLLPK	I				4	110328_WaxPromix10ulA10_NH4OH80ACN.366.366.1.dta
3					676	1	0	379.714	757.414	2	757.416	-0.0014	198	204	0	35.35		35	0.053	K	GACLLPK	I				5	110328_WaxPromix10ulA10_NH4OH80ACN.1371.1371.2.dta
3					677	1	0	379.714	757.414	2	757.416	-0.0011	198	204	0	33.14		35	0.079	K	GACLLPK	I				5	110328_WaxPromix10ulA10_NH4OH80ACN.321.321.2.dta
3					678	1	0	758.422	757.415	1	757.416	-0.001	198	204	0	28.16	27	35	0.25	K	GACLLPK	I				4	110328_WaxPromix10ulA10_NH4OH80ACN.764.764.1.dta
3					679	1	0	758.422	757.415	1	757.416	-0.001	198	204	0	31.09	29	35	0.13	K	GACLLPK	I				4	110328_WaxPromix10ulA10_NH4OH80ACN.675.675.1.dta
3					680	1	0	379.715	757.415	2	757.416	-0.001	198	204	0	28.64		35	0.22	K	GACLLPK	I				8	110328_WaxPromix10ulA10_NH4OH80ACN.1168.1168.2.dta
3					681	1	0	758.422	757.415	1	757.416	-0.0009	198	204	0	30.83	29	35	0.13	K	GACLLPK	I				4	110328_WaxPromix10ulA10_NH4OH80ACN.720.720.1.dta
3					682	1	0	379.715	757.415	2	757.416	-0.0007	198	204	0	30.29		35	0.15	K	GACLLPK	I				8	110328_WaxPromix10ulA10_NH4OH80ACN.281.281.2.dta
3					683	1	0	379.715	757.415	2	757.416	-0.0006	198	204	0	35.83		35	0.043	K	GACLLPK	I				5	110328_WaxPromix10ulA10_NH4OH80ACN.1223.1223.2.dta
3					684	1	0	758.423	757.415	1	757.416	-0.0002	198	204	0	21.68	24	35	1.1	K	GACLLPK	I				6	110328_WaxPromix10ulA10_NH4OH80ACN.1048.1048.1.dta
3					685	1	0	758.423	757.415	1	757.416	-0.0001	198	204	0	20.82	22	35	1.4	K	GACLLPK	I				4	110328_WaxPromix10ulA10_NH4OH80ACN.1252.1252.1.dta
3					686	1	0	758.423	757.416	1	757.416	0	198	204	0	21.72	24	37	1.8	K	GACLLPK	I				8	110328_WaxPromix10ulA10_NH4OH80ACN.282.282.1.dta
3					687	1	0	758.423	757.416	1	757.416	0	198	204	0	30.87	30	37	0.22	K	GACLLPK	I				4	110328_WaxPromix10ulA10_NH4OH80ACN.322.322.1.dta
3					688	1	0	758.424	757.417	1	757.416	0.0012	198	204	0	29.17	29	37	0.31	K	GACLLPK	I				7	110328_WaxPromix10ulA10_NH4OH80ACN.1094.1094.1.dta
3					689	1	0	758.424	757.417	1	757.416	0.0012	198	204	0	26.89	30	37	0.53	K	GACLLPK	I				8	110328_WaxPromix10ulA10_NH4OH80ACN.1139.1139.1.dta
3					690	1	0	758.424	757.417	1	757.416	0.0016	198	204	0	28.79	29	37	0.34	K	GACLLPK	I				8	110328_WaxPromix10ulA10_NH4OH80ACN.1196.1196.1.dta
3					747	1	0	395.238	788.461	2	788.464	-0.0039	257	263	0	49.15		39	0.0059	K	IVTDLTK	V				9	110328_WaxPromix10ulA10_NH4OH80ACN.1419.1419.2.dta
3					748	1	0	395.238	788.461	2	788.464	-0.0038	257	263	0	42.97		39	0.024	K	IVTDLTK	V				6	110328_WaxPromix10ulA10_NH4OH80ACN.1580.1580.2.dta
3					749	1	0	395.238	788.461	2	788.464	-0.0038	257	263	0	44.24		39	0.018	K	IVTDLTK	V				6	110328_WaxPromix10ulA10_NH4OH80ACN.1526.1526.2.dta
3					750	1	0	395.238	788.461	2	788.464	-0.0038	257	263	0	49.28		39	0.0057	K	IVTDLTK	V				9	110328_WaxPromix10ulA10_NH4OH80ACN.1472.1472.2.dta
3					751	1	0	395.238	788.461	2	788.464	-0.0035	257	263	0	44.42		39	0.017	K	IVTDLTK	V				6	110328_WaxPromix10ulA10_NH4OH80ACN.1364.1364.2.dta
3					752	1	0	395.238	788.462	2	788.464	-0.0025	257	263	0	55.05		39	0.0013	K	IVTDLTK	V				6	110328_WaxPromix10ulA10_NH4OH80ACN.1625.1625.2.dta
3					753	1	0	395.238	788.462	2	788.464	-0.0024	257	263	0	37.13		39	0.081	K	IVTDLTK	V				6	110328_WaxPromix10ulA10_NH4OH80ACN.1310.1310.2.dta
3					754	1	0	789.47	788.462	1	788.464	-0.0019	257	263	0	38.33		39	0.062	K	IVTDLTK	V				5	110328_WaxPromix10ulA10_NH4OH80ACN.1559.1559.1.dta
3					756	1	0	789.47	788.463	1	788.464	-0.0016	257	263	0	36.06		40	0.13	K	IVTDLTK	V				5	110328_WaxPromix10ulA10_NH4OH80ACN.1397.1397.1.dta
3					757	7	0	789.47	788.463	1	788.464	-0.0015	257	263	0	31.37		40	0.37	K	IVTDLTK	V				5	110328_WaxPromix10ulA10_NH4OH80ACN.1451.1451.1.dta
3					758	1	0	789.47	788.463	1	788.464	-0.0014	257	263	0	35.99		40	0.13	K	IVTDLTK	V				5	110328_WaxPromix10ulA10_NH4OH80ACN.1504.1504.1.dta
3					759	1	0	395.239	788.463	2	788.464	-0.0011	257	263	0	23.03	32	40	2.5	K	IVTDLTK	V				6	110328_WaxPromix10ulA10_NH4OH80ACN.1261.1261.2.dta
3					760	1	0	395.239	788.463	2	788.464	-0.001	257	263	0	36.63		40	0.11	K	IVTDLTK	V				5	110328_WaxPromix10ulA10_NH4OH80ACN.1681.1681.2.dta
3					761	1	0	395.239	788.463	2	788.464	-0.0009	257	263	0	33.32	38	40	0.24	K	IVTDLTK	V				4	110328_WaxPromix10ulA10_NH4OH80ACN.1739.1739.2.dta
3					762	1	0	395.239	788.463	2	788.464	-0.0009	257	263	0	30.6	39	40	0.44	K	IVTDLTK	V				6	110328_WaxPromix10ulA10_NH4OH80ACN.1854.1854.2.dta
3					763	1	0	789.471	788.464	1	788.464	-0.0008	257	263	0	36.12		40	0.12	K	IVTDLTK	V				5	110328_WaxPromix10ulA10_NH4OH80ACN.1344.1344.1.dta
3					764	1	0	395.239	788.464	2	788.464	-0.0007	257	263	0	23.36	31	40	2.3	K	IVTDLTK	V				6	110328_WaxPromix10ulA10_NH4OH80ACN.1796.1796.2.dta
3					766	1	0	789.472	788.465	1	788.464	0.0002	257	263	0	25.17	37	39	1.5	K	IVTDLTK	V				7	110328_WaxPromix10ulA10_NH4OH80ACN.1294.1294.1.dta
3					950	1	0	420.154	838.293	2	838.295	-0.0017	581	587	0	20.21	28	34	1.3	K	CCAADDK	E				4	110328_WaxPromix10ulA10_NH4OH80ACN.4047.4047.2.dta
3					951	1	0	420.154	838.293	2	838.295	-0.0016	581	587	0	44.1		34	0.005	K	CCAADDK	E				6	110328_WaxPromix10ulA10_NH4OH80ACN.3854.3854.2.dta
3					952	1	0	420.154	838.293	2	838.295	-0.0015	581	587	0	44.92		34	0.0041	K	CCAADDK	E				6	110328_WaxPromix10ulA10_NH4OH80ACN.3900.3900.2.dta
3					953	1	0	420.154	838.294	2	838.295	-0.0009	581	587	0	39.06		34	0.018	K	CCAADDK	E				6	110328_WaxPromix10ulA10_NH4OH80ACN.3949.3949.2.dta
3					954	1	0	420.154	838.294	2	838.295	-0.0009	581	587	0	30.54		32	0.071	K	CCAADDK	E				6	110328_WaxPromix10ulA10_NH4OH80ACN.3999.3999.2.dta
3					955	1	0	420.154	838.294	2	838.295	-0.0007	581	587	0	28.4		31	0.11	K	CCAADDK	E				6	110328_WaxPromix10ulA10_NH4OH80ACN.3811.3811.2.dta
3					1086	1	0	443.709	885.404	2	885.408	-0.0042	131	138	0	56.69	36	38	0.00077	K	DDSPDLPK	L				7	110328_WaxPromix10ulA10_NH4OH80ACN.6150.6150.2.dta
3					1087	1	0	443.709	885.404	2	885.408	-0.0041	131	138	0	51.6	35	38	0.0025	K	DDSPDLPK	L				7	110328_WaxPromix10ulA10_NH4OH80ACN.6101.6101.2.dta
3					1088	1	0	443.709	885.404	2	885.408	-0.004	131	138	0	52.85	36	38	0.0019	K	DDSPDLPK	L				7	110328_WaxPromix10ulA10_NH4OH80ACN.6051.6051.2.dta
3					1089	1	0	443.71	885.405	2	885.408	-0.0032	131	138	0	48.3	35	38	0.0053	K	DDSPDLPK	L				7	110328_WaxPromix10ulA10_NH4OH80ACN.5999.5999.2.dta
3					1090	1	0	443.71	885.405	2	885.408	-0.0029	131	138	0	51.6	36	38	0.0027	K	DDSPDLPK	L				7	110328_WaxPromix10ulA10_NH4OH80ACN.6196.6196.2.dta
3					1091	1	0	443.71	885.406	2	885.408	-0.0021	131	138	0	30.02	28	39	0.4	K	DDSPDLPK	L				5	110328_WaxPromix10ulA10_NH4OH80ACN.6757.6757.2.dta
3					1093	1	0	443.71	885.406	2	885.408	-0.0019	131	138	0	56.63	36	38	0.00082	K	DDSPDLPK	L				7	110328_WaxPromix10ulA10_NH4OH80ACN.5949.5949.2.dta
3					1094	1	0	443.71	885.406	2	885.408	-0.0018	131	138	0	35.93	27	38	0.097	K	DDSPDLPK	L				7	110328_WaxPromix10ulA10_NH4OH80ACN.6856.6856.2.dta
3					1095	1	0	443.711	885.406	2	885.408	-0.0016	131	138	0	48.27	34	38	0.0057	K	DDSPDLPK	L				7	110328_WaxPromix10ulA10_NH4OH80ACN.6243.6243.2.dta
3					1096	1	0	443.711	885.406	2	885.408	-0.0015	131	138	0	29.71	33	39	0.48	K	DDSPDLPK	L				5	110328_WaxPromix10ulA10_NH4OH80ACN.6905.6905.2.dta
3					1097	1	0	443.711	885.407	2	885.408	-0.0013	131	138	0	21.83	27	39	2.8	K	DDSPDLPK	L				5	110328_WaxPromix10ulA10_NH4OH80ACN.6660.6660.2.dta
3					1099	1	0	443.711	885.407	2	885.408	-0.0012	131	138	0	55.16		39	0.0013	K	DDSPDLPK	L				7	110328_WaxPromix10ulA10_NH4OH80ACN.6288.6288.2.dta
3					1100	1	0	443.711	885.407	2	885.408	-0.0011	131	138	0	21.81	33	39	2.8	K	DDSPDLPK	L				4	110328_WaxPromix10ulA10_NH4OH80ACN.7190.7190.2.dta
3					1101	1	0	443.711	885.407	2	885.408	-0.001	131	138	0	52.75	38	39	0.0022	K	DDSPDLPK	L				7	110328_WaxPromix10ulA10_NH4OH80ACN.5901.5901.2.dta
3					1103	1	0	443.711	885.407	2	885.408	-0.0009	131	138	0	28.65	34	39	0.58	K	DDSPDLPK	L				6	110328_WaxPromix10ulA10_NH4OH80ACN.6561.6561.2.dta
3					1104	1	0	443.711	885.407	2	885.408	-0.0009	131	138	0	32.32	31	39	0.25	K	DDSPDLPK	L				10	110328_WaxPromix10ulA10_NH4OH80ACN.6808.6808.2.dta
3					1105	1	0	443.711	885.407	2	885.408	-0.0009	131	138	0	27.27	31	39	0.8	K	DDSPDLPK	L				6	110328_WaxPromix10ulA10_NH4OH80ACN.6385.6385.2.dta
3					1106	1	0	443.711	885.407	2	885.408	-0.0008	131	138	0	31.53	31	39	0.3	K	DDSPDLPK	L				6	110328_WaxPromix10ulA10_NH4OH80ACN.6520.6520.2.dta
3					1107	1	0	443.711	885.407	2	885.408	-0.0008	131	138	0	24.77	32	39	1.4	K	DDSPDLPK	L				6	110328_WaxPromix10ulA10_NH4OH80ACN.6472.6472.2.dta
3					1108	1	0	443.711	885.407	2	885.408	-0.0006	131	138	0	35.1	35	39	0.14	K	DDSPDLPK	L				6	110328_WaxPromix10ulA10_NH4OH80ACN.6337.6337.2.dta
3					1109	1	0	443.711	885.407	2	885.408	-0.0005	131	138	0	33.96	37	40	0.24	K	DDSPDLPK	L				6	110328_WaxPromix10ulA10_NH4OH80ACN.6610.6610.2.dta
3					1110	1	0	886.415	885.408	1	885.408	-0.0005	131	138	0	20.69	33	40	5	K	DDSPDLPK	L				9	110328_WaxPromix10ulA10_NH4OH80ACN.6292.6292.1.dta
3					1111	1	0	443.711	885.408	2	885.408	-0.0001	131	138	0	23.79	30	40	2.2	K	DDSPDLPK	L				6	110328_WaxPromix10ulA10_NH4OH80ACN.6430.6430.2.dta
3					1112	1	0	886.415	885.408	1	885.408	0	131	138	0	26.04	33	40	1.3	K	DDSPDLPK	L				5	110328_WaxPromix10ulA10_NH4OH80ACN.6127.6127.1.dta
3					1113	1	0	886.415	885.408	1	885.408	0.0001	131	138	0	35.67	33	40	0.14	K	DDSPDLPK	L				7	110328_WaxPromix10ulA10_NH4OH80ACN.6076.6076.1.dta
3					1114	1	0	886.416	885.409	1	885.408	0.0006	131	138	0	34.47	33	39	0.16	K	DDSPDLPK	L				8	110328_WaxPromix10ulA10_NH4OH80ACN.6026.6026.1.dta
3					1115	1	0	886.416	885.409	1	885.408	0.0009	131	138	0	32.57	33	39	0.26	K	DDSPDLPK	L				9	110328_WaxPromix10ulA10_NH4OH80ACN.6175.6175.1.dta
3					1116	1	0	886.417	885.409	1	885.408	0.0015	131	138	0	30.62	32	39	0.41	K	DDSPDLPK	L				5	110328_WaxPromix10ulA10_NH4OH80ACN.6222.6222.1.dta
3					1135	1	0	449.743	897.471	2	897.474	-0.0035	483	489	0	34.57		38	0.13	R	LCVLHEK	T				6	110328_WaxPromix10ulA10_NH4OH80ACN.1365.1365.2.dta
3					1136	1	0	449.743	897.471	2	897.474	-0.0033	483	489	0	38.05		38	0.06	R	LCVLHEK	T				6	110328_WaxPromix10ulA10_NH4OH80ACN.1309.1309.2.dta
3					1137	1	0	449.743	897.471	2	897.474	-0.0027	483	489	0	38.09		38	0.053	R	LCVLHEK	T				6	110328_WaxPromix10ulA10_NH4OH80ACN.1473.1473.2.dta
3					1138	1	0	449.743	897.472	2	897.474	-0.0023	483	489	0	34.2		38	0.13	R	LCVLHEK	T				6	110328_WaxPromix10ulA10_NH4OH80ACN.1627.1627.2.dta
3					1139	1	0	449.743	897.472	2	897.474	-0.0019	483	489	0	36.11		39	0.099	R	LCVLHEK	T				6	110328_WaxPromix10ulA10_NH4OH80ACN.1528.1528.2.dta
3					1140	1	0	449.743	897.472	2	897.474	-0.0018	483	489	0	33.15		38	0.19	R	LCVLHEK	T				6	110328_WaxPromix10ulA10_NH4OH80ACN.1908.1908.2.dta
3					1141	3	0	898.48	897.473	1	897.474	-0.0016	483	489	0	22.35		38	2.3	R	LCVLHEK	T				7	110328_WaxPromix10ulA10_NH4OH80ACN.1389.1389.1.dta
3					1142	1	0	449.744	897.473	2	897.474	-0.0016	483	489	0	23.51	31	38	1.8	R	LCVLHEK	T				6	110328_WaxPromix10ulA10_NH4OH80ACN.2080.2080.2.dta
3					1143	3	0	898.48	897.473	1	897.474	-0.0016	483	489	0	22.27		38	2.3	R	LCVLHEK	T				7	110328_WaxPromix10ulA10_NH4OH80ACN.1443.1443.1.dta
3					1144	2	0	898.48	897.473	1	897.474	-0.0015	483	489	0	22.32	34	38	2.3	R	LCVLHEK	T				7	110328_WaxPromix10ulA10_NH4OH80ACN.1333.1333.1.dta
3					1145	1	0	449.744	897.473	2	897.474	-0.0015	483	489	0	33.23		38	0.19	R	LCVLHEK	T				6	110328_WaxPromix10ulA10_NH4OH80ACN.1582.1582.2.dta
3					1146	1	0	449.744	897.473	2	897.474	-0.0015	483	489	0	39.38		38	0.045	R	LCVLHEK	T				6	110328_WaxPromix10ulA10_NH4OH80ACN.1254.1254.2.dta
3					1147	1	0	449.744	897.473	2	897.474	-0.0013	483	489	0	33.15	36	38	0.19	R	LCVLHEK	T				6	110328_WaxPromix10ulA10_NH4OH80ACN.1203.1203.2.dta
3					1148	1	0	898.48	897.473	1	897.474	-0.0012	483	489	0	23.08	35	38	1.9	R	LCVLHEK	T				4	110328_WaxPromix10ulA10_NH4OH80ACN.1549.1549.1.dta
3					1149	1	0	449.744	897.473	2	897.474	-0.001	483	489	0	34.21		38	0.14	R	LCVLHEK	T				6	110328_WaxPromix10ulA10_NH4OH80ACN.1800.1800.2.dta
3					1151	1	0	449.744	897.473	2	897.474	-0.0007	483	489	0	36.67		38	0.084	R	LCVLHEK	T				6	110328_WaxPromix10ulA10_NH4OH80ACN.1683.1683.2.dta
3					1152	1	0	449.744	897.473	2	897.474	-0.0007	483	489	0	38.56		38	0.054	R	LCVLHEK	T				6	110328_WaxPromix10ulA10_NH4OH80ACN.1741.1741.2.dta
3					1153	1	0	449.744	897.474	2	897.474	-0.0006	483	489	0	25	33	38	1.2	R	LCVLHEK	T				9	110328_WaxPromix10ulA10_NH4OH80ACN.1856.1856.2.dta
3					1495	1	0	507.811	1013.61	2	1013.61	-0.0046	549	557	0	62.08		37	0.00016	K	QTALVELLK	H				7	110328_WaxPromix10ulA10_NH4OH80ACN.1210.1210.2.dta
3					1496	1	0	507.811	1013.61	2	1013.61	-0.0042	549	557	0	64.74		37	8.5e-05	K	QTALVELLK	H				7	110328_WaxPromix10ulA10_NH4OH80ACN.1155.1155.2.dta
3					1497	1	0	507.812	1013.61	2	1013.61	-0.0036	549	557	0	57.48		36	0.00043	K	QTALVELLK	H				7	110328_WaxPromix10ulA10_NH4OH80ACN.1111.1111.2.dta
3					1498	1	0	507.812	1013.61	2	1013.61	-0.0034	549	557	0	59.18		36	0.00029	K	QTALVELLK	H				7	110328_WaxPromix10ulA10_NH4OH80ACN.1265.1265.2.dta
3					1500	1	0	507.812	1013.61	2	1013.61	-0.0021	549	557	0	53.92		37	0.0012	K	QTALVELLK	H				7	110328_WaxPromix10ulA10_NH4OH80ACN.1321.1321.2.dta
3					1501	1	0	507.812	1013.61	2	1013.61	-0.0018	549	557	0	48.61	34	37	0.004	K	QTALVELLK	H				7	110328_WaxPromix10ulA10_NH4OH80ACN.1376.1376.2.dta
3					1502	1	0	507.812	1013.61	2	1013.61	-0.0017	549	557	0	44.66		37	0.0099	K	QTALVELLK	H				7	110328_WaxPromix10ulA10_NH4OH80ACN.1431.1431.2.dta
3					1503	1	0	507.812	1013.61	2	1013.61	-0.0017	549	557	0	31.18		37	0.22	K	QTALVELLK	H				4	110328_WaxPromix10ulA10_NH4OH80ACN.1540.1540.2.dta
3					1504	1	0	507.813	1013.61	2	1013.61	-0.0014	549	557	0	32.5		37	0.16	K	QTALVELLK	H				6	110328_WaxPromix10ulA10_NH4OH80ACN.1067.1067.2.dta
3					1506	1	0	507.813	1013.61	2	1013.61	-0.0012	549	557	0	45.7		37	0.0076	K	QTALVELLK	H				6	110328_WaxPromix10ulA10_NH4OH80ACN.1484.1484.2.dta
3					1509	1	0	1014.62	1013.61	1	1013.61	0.0007	549	557	0	24.04	32	37	1	K	QTALVELLK	H				10	110328_WaxPromix10ulA10_NH4OH80ACN.1279.1279.1.dta
3					1510	1	0	1014.62	1013.61	1	1013.61	0.0007	549	557	0	22.06	29	37	1.6	K	QTALVELLK	H				5	110328_WaxPromix10ulA10_NH4OH80ACN.1211.1211.1.dta
3					1511	1	0	1014.62	1013.61	1	1013.61	0.0019	549	557	0	23.73	27	37	1.1	K	QTALVELLK	H				11	110328_WaxPromix10ulA10_NH4OH80ACN.1156.1156.1.dta
3					1512	1	0	1014.62	1013.61	1	1013.61	0.0026	549	557	0	24.9	31	36	0.73	K	QTALVELLK	H				10	110328_WaxPromix10ulA10_NH4OH80ACN.1112.1112.1.dta
3					1856	1	0	569.75	1137.49	2	1137.49	-0.0043	499	507	0	49.1	30	39	0.0052	K	CCTESLVNR	R				8	110328_WaxPromix10ulA10_NH4OH80ACN.2213.2213.2.dta
3					1857	1	0	569.752	1137.49	2	1137.49	-0.0007	499	507	0	45.81	33	39	0.012	K	CCTESLVNR	R				6	110328_WaxPromix10ulA10_NH4OH80ACN.2385.2385.2.dta
3					1858	1	0	569.753	1137.49	2	1137.49	-0.0003	499	507	0	43.88	30	39	0.019	K	CCTESLVNR	R				8	110328_WaxPromix10ulA10_NH4OH80ACN.2274.2274.2.dta
3					1859	1	0	569.753	1137.49	2	1137.49	0.0003	499	507	0	57.29	30	39	0.00084	K	CCTESLVNR	R				8	110328_WaxPromix10ulA10_NH4OH80ACN.2328.2328.2.dta
3					1860	1	0	569.753	1137.49	2	1137.49	0.0005	499	507	0	36.12	30	39	0.11	K	CCTESLVNR	R				6	110328_WaxPromix10ulA10_NH4OH80ACN.2440.2440.2.dta
3					1861	1	0	569.753	1137.49	2	1137.49	0.0009	499	507	0	55.11	34	39	0.0014	K	CCTESLVNR	R				8	110328_WaxPromix10ulA10_NH4OH80ACN.2163.2163.2.dta
3					1862	1	0	1138.5	1137.49	1	1137.49	0.0018	499	507	0	29.48	26	39	0.52	K	CCTESLVNR	R				9	110328_WaxPromix10ulA10_NH4OH80ACN.2199.2199.1.dta
3					1870	1	0	381.575	1141.7	3	1141.71	-0.0025	548	557	1	52.05		34	0.00093	K	KQTALVELLK	H				7	110328_WaxPromix10ulA10_NH4OH80ACN.1622.1622.3.dta
3					1871	1	0	381.576	1141.71	3	1141.71	-0.0018	548	557	1	54.1		34	0.00058	K	KQTALVELLK	H				8	110328_WaxPromix10ulA10_NH4OH80ACN.2045.2045.3.dta
3					1872	1	0	571.86	1141.71	2	1141.71	-0.0017	548	557	1	36.31	30	34	0.035	K	KQTALVELLK	H				8	110328_WaxPromix10ulA10_NH4OH80ACN.1619.1619.2.dta
3					1873	1	0	381.576	1141.71	3	1141.71	-0.0017	548	557	1	62.07		34	9.2e-05	K	KQTALVELLK	H				8	110328_WaxPromix10ulA10_NH4OH80ACN.1942.1942.3.dta
3					1874	1	0	571.86	1141.71	2	1141.71	-0.0016	548	557	1	45.41	33	34	0.0043	K	KQTALVELLK	H				6	110328_WaxPromix10ulA10_NH4OH80ACN.2118.2118.2.dta
3					1875	1	0	381.576	1141.71	3	1141.71	-0.0015	548	557	1	58.15		34	0.00023	K	KQTALVELLK	H				8	110328_WaxPromix10ulA10_NH4OH80ACN.1715.1715.3.dta
3					1876	1	0	571.86	1141.71	2	1141.71	-0.0015	548	557	1	43.68	33	34	0.0063	K	KQTALVELLK	H				8	110328_WaxPromix10ulA10_NH4OH80ACN.1660.1660.2.dta
3					1877	1	0	381.576	1141.71	3	1141.71	-0.0014	548	557	1	58.16		34	0.00023	K	KQTALVELLK	H				6	110328_WaxPromix10ulA10_NH4OH80ACN.1772.1772.3.dta
3					1878	1	0	571.86	1141.71	2	1141.71	-0.0014	548	557	1	49.42		34	0.0017	K	KQTALVELLK	H				12	110328_WaxPromix10ulA10_NH4OH80ACN.2063.2063.2.dta
3					1879	1	0	381.576	1141.71	3	1141.71	-0.0014	548	557	1	57.49		34	0.00026	K	KQTALVELLK	H				6	110328_WaxPromix10ulA10_NH4OH80ACN.1828.1828.3.dta
3					1880	1	0	381.576	1141.71	3	1141.71	-0.0013	548	557	1	55.72		34	0.0004	K	KQTALVELLK	H				8	110328_WaxPromix10ulA10_NH4OH80ACN.1663.1663.3.dta
3					1881	1	0	571.86	1141.71	2	1141.71	-0.0013	548	557	1	45.81		34	0.0039	K	KQTALVELLK	H				13	110328_WaxPromix10ulA10_NH4OH80ACN.1883.1883.2.dta
3					1882	1	0	571.86	1141.71	2	1141.71	-0.0008	548	557	1	50.89	32	34	0.0012	K	KQTALVELLK	H				8	110328_WaxPromix10ulA10_NH4OH80ACN.1827.1827.2.dta
3					1883	1	0	381.576	1141.71	3	1141.71	-0.0007	548	557	1	65.6		34	4.1e-05	K	KQTALVELLK	H				7	110328_WaxPromix10ulA10_NH4OH80ACN.1885.1885.3.dta
3					1884	1	0	571.861	1141.71	2	1141.71	-0.0006	548	557	1	44.03	31	34	0.0058	K	KQTALVELLK	H				8	110328_WaxPromix10ulA10_NH4OH80ACN.1940.1940.2.dta
3					1885	1	0	571.861	1141.71	2	1141.71	-0.0003	548	557	1	61.18		35	0.00013	K	KQTALVELLK	H				8	110328_WaxPromix10ulA10_NH4OH80ACN.1770.1770.2.dta
3					1886	1	0	571.861	1141.71	2	1141.71	0	548	557	1	53.11		35	0.00083	K	KQTALVELLK	H				8	110328_WaxPromix10ulA10_NH4OH80ACN.1714.1714.2.dta
3					1887	1	0	381.576	1141.71	3	1141.71	0.0003	548	557	1	70.48		33	9.7e-06	K	KQTALVELLK	H				7	110328_WaxPromix10ulA10_NH4OH80ACN.1990.1990.3.dta
3					1888	1	0	571.861	1141.71	2	1141.71	0.0007	548	557	1	32.36	28	33	0.064	K	KQTALVELLK	H				11	110328_WaxPromix10ulA10_NH4OH80ACN.1986.1986.2.dta
3					1889	1	0	381.577	1141.71	3	1141.71	0.0007	548	557	1	54.96		33	0.00035	K	KQTALVELLK	H				8	110328_WaxPromix10ulA10_NH4OH80ACN.2099.2099.3.dta
3					2125	1	0	428.574	1282.7	3	1282.7	-0.0026	361	371	0	38.82	36	38	0.044	R	HPEYAVSVLLR	L				10	110328_WaxPromix10ulA10_NH4OH80ACN.1615.1615.3.dta
3					2126	1	0	428.574	1282.7	3	1282.7	-0.0026	361	371	0	47.63	35	38	0.0058	R	HPEYAVSVLLR	L				13	110328_WaxPromix10ulA10_NH4OH80ACN.1345.1345.3.dta
3					2127	1	0	428.574	1282.7	3	1282.7	-0.0023	361	371	0	44.85		38	0.011	R	HPEYAVSVLLR	L				10	110328_WaxPromix10ulA10_NH4OH80ACN.1400.1400.3.dta
3					2128	1	0	428.574	1282.7	3	1282.7	-0.0022	361	371	0	35.91	37	38	0.09	R	HPEYAVSVLLR	L				6	110328_WaxPromix10ulA10_NH4OH80ACN.1561.1561.3.dta
3					2129	1	0	642.358	1282.7	2	1282.7	-0.0021	361	371	0	53.08	35	38	0.0017	R	HPEYAVSVLLR	L				9	110328_WaxPromix10ulA10_NH4OH80ACN.1478.1478.2.dta
3					2130	1	0	428.574	1282.7	3	1282.7	-0.002	361	371	0	41.99	37	38	0.022	R	HPEYAVSVLLR	L				7	110328_WaxPromix10ulA10_NH4OH80ACN.1291.1291.3.dta
3					2131	1	0	428.574	1282.7	3	1282.7	-0.002	361	371	0	38.16	33	38	0.053	R	HPEYAVSVLLR	L				7	110328_WaxPromix10ulA10_NH4OH80ACN.1884.1884.3.dta
3					2132	1	0	642.358	1282.7	2	1282.7	-0.0018	361	371	0	51.03	35	38	0.0028	R	HPEYAVSVLLR	L				9	110328_WaxPromix10ulA10_NH4OH80ACN.1311.1311.2.dta
3					2133	1	0	642.358	1282.7	2	1282.7	-0.0018	361	371	0	21.07	32	38	2.7	R	HPEYAVSVLLR	L				4	110328_WaxPromix10ulA10_NH4OH80ACN.1912.1912.2.dta
3					2134	1	0	428.575	1282.7	3	1282.7	-0.0018	361	371	0	35.49	33	38	0.099	R	HPEYAVSVLLR	L				9	110328_WaxPromix10ulA10_NH4OH80ACN.1835.1835.3.dta
3					2135	1	0	642.358	1282.7	2	1282.7	-0.0017	361	371	0	53.48		38	0.0016	R	HPEYAVSVLLR	L				9	110328_WaxPromix10ulA10_NH4OH80ACN.1532.1532.2.dta
3					2136	1	0	642.358	1282.7	2	1282.7	-0.0017	361	371	0	42.08	34	38	0.021	R	HPEYAVSVLLR	L				14	110328_WaxPromix10ulA10_NH4OH80ACN.1424.1424.2.dta
3					2137	1	0	428.575	1282.7	3	1282.7	-0.0017	361	371	0	39.7	37	38	0.037	R	HPEYAVSVLLR	L				8	110328_WaxPromix10ulA10_NH4OH80ACN.1505.1505.3.dta
3					2138	1	0	428.575	1282.7	3	1282.7	-0.0016	361	371	0	34.42		38	0.13	R	HPEYAVSVLLR	L				6	110328_WaxPromix10ulA10_NH4OH80ACN.1774.1774.3.dta
3					2139	1	0	428.575	1282.7	3	1282.7	-0.0016	361	371	0	21.27	28	38	2.6	R	HPEYAVSVLLR	L				8	110328_WaxPromix10ulA10_NH4OH80ACN.1941.1941.3.dta
3					2140	1	0	642.358	1282.7	2	1282.7	-0.0015	361	371	0	62.33	35	38	0.00021	R	HPEYAVSVLLR	L				9	110328_WaxPromix10ulA10_NH4OH80ACN.1366.1366.2.dta
3					2141	1	0	428.575	1282.7	3	1282.7	-0.0013	361	371	0	35.83		38	0.09	R	HPEYAVSVLLR	L				9	110328_WaxPromix10ulA10_NH4OH80ACN.1664.1664.3.dta
3					2142	1	0	428.575	1282.7	3	1282.7	-0.0013	361	371	0	41.3	37	38	0.025	R	HPEYAVSVLLR	L				6	110328_WaxPromix10ulA10_NH4OH80ACN.1233.1233.3.dta
3					2143	1	0	428.575	1282.7	3	1282.7	-0.0012	361	371	0	42.79	37	38	0.018	R	HPEYAVSVLLR	L				12	110328_WaxPromix10ulA10_NH4OH80ACN.1454.1454.3.dta
3					2144	1	0	428.575	1282.7	3	1282.7	-0.0011	361	371	0	36.09		38	0.084	R	HPEYAVSVLLR	L				10	110328_WaxPromix10ulA10_NH4OH80ACN.1131.1131.3.dta
3					2145	1	0	428.575	1282.7	3	1282.7	-0.0011	361	371	0	38.92		38	0.044	R	HPEYAVSVLLR	L				7	110328_WaxPromix10ulA10_NH4OH80ACN.1180.1180.3.dta
3					2146	1	0	428.575	1282.7	3	1282.7	-0.0009	361	371	0	33.72	31	38	0.15	R	HPEYAVSVLLR	L				7	110328_WaxPromix10ulA10_NH4OH80ACN.2090.2090.3.dta
3					2147	1	0	428.575	1282.7	3	1282.7	-0.0008	361	371	0	28.03		38	0.56	R	HPEYAVSVLLR	L				10	110328_WaxPromix10ulA10_NH4OH80ACN.1720.1720.3.dta
3					2148	2	0	642.359	1282.7	2	1282.7	-0.0006	361	371	0	28.28	27	38	0.48	R	HPEYAVSVLLR	L				6	110328_WaxPromix10ulA10_NH4OH80ACN.1639.1639.2.dta
3					2150	1	0	642.359	1282.7	2	1282.7	-0.0003	361	371	0	46.75	36	38	0.0067	R	HPEYAVSVLLR	L				9	110328_WaxPromix10ulA10_NH4OH80ACN.1255.1255.2.dta
3					2151	1	0	642.359	1282.7	2	1282.7	0.0001	361	371	0	31.17	35	37	0.24	R	HPEYAVSVLLR	L				9	110328_WaxPromix10ulA10_NH4OH80ACN.1690.1690.2.dta
3					2152	1	0	642.359	1282.7	2	1282.7	0.0003	361	371	0	45.43		37	0.009	R	HPEYAVSVLLR	L				8	110328_WaxPromix10ulA10_NH4OH80ACN.1587.1587.2.dta
3					2153	1	0	642.359	1282.7	2	1282.7	0.0003	361	371	0	31.89		37	0.2	R	HPEYAVSVLLR	L				5	110328_WaxPromix10ulA10_NH4OH80ACN.1745.1745.2.dta
3					2154	1	0	642.359	1282.7	2	1282.7	0.0004	361	371	0	49.18		37	0.0038	R	HPEYAVSVLLR	L				9	110328_WaxPromix10ulA10_NH4OH80ACN.1199.1199.2.dta
3					2155	1	0	428.575	1282.7	3	1282.7	0.0005	361	371	0	26.26	34	37	0.74	R	HPEYAVSVLLR	L				11	110328_WaxPromix10ulA10_NH4OH80ACN.2044.2044.3.dta
3					2157	1	0	642.36	1282.71	2	1282.7	0.0024	361	371	0	35.23	34	38	0.1	R	HPEYAVSVLLR	L				8	110328_WaxPromix10ulA10_NH4OH80ACN.1148.1148.2.dta
3					2195	1	0	653.359	1304.7	2	1304.71	-0.0063	402	412	0	46.46	26	40	0.014	K	HLVDEPQNLIK	K				14	110328_WaxPromix10ulA10_NH4OH80ACN.2026.2026.2.dta
3					2196	1	0	653.359	1304.7	2	1304.71	-0.0051	402	412	0	56.66	24	40	0.0013	K	HLVDEPQNLIK	K				9	110328_WaxPromix10ulA10_NH4OH80ACN.1936.1936.2.dta
3					2197	1	0	653.359	1304.7	2	1304.71	-0.0048	402	412	0	26.11	24	41	1.5	K	HLVDEPQNLIK	K				15	110328_WaxPromix10ulA10_NH4OH80ACN.6851.6851.2.dta
3					2198	1	0	435.909	1304.7	3	1304.71	-0.0044	402	412	0	41.35		40	0.043	K	HLVDEPQNLIK	K				12	110328_WaxPromix10ulA10_NH4OH80ACN.2027.2027.3.dta
3					2199	1	0	435.909	1304.7	3	1304.71	-0.004	402	412	0	41.38		40	0.045	K	HLVDEPQNLIK	K				12	110328_WaxPromix10ulA10_NH4OH80ACN.1971.1971.3.dta
3					2200	1	0	653.36	1304.71	2	1304.71	-0.0025	402	412	0	33.76	29	41	0.27	K	HLVDEPQNLIK	K				8	110328_WaxPromix10ulA10_NH4OH80ACN.6681.6681.2.dta
3					2203	5	0	435.909	1304.71	3	1304.71	-0.0022	402	412	0	21.41	35	40	4.3	K	HLVDEPQNLIK	K				11	110328_WaxPromix10ulA10_NH4OH80ACN.2253.2253.3.dta
3					2204	1	0	435.909	1304.71	3	1304.71	-0.0021	402	412	0	33.85		40	0.24	K	HLVDEPQNLIK	K				8	110328_WaxPromix10ulA10_NH4OH80ACN.1926.1926.3.dta
3					2205	1	0	653.361	1304.71	2	1304.71	-0.0018	402	412	0	22.17	22	40	3.6	K	HLVDEPQNLIK	K				10	110328_WaxPromix10ulA10_NH4OH80ACN.3676.3676.2.dta
3					2206	2	0	435.91	1304.71	3	1304.71	-0.0017	402	412	0	30.5		40	0.53	K	HLVDEPQNLIK	K				12	110328_WaxPromix10ulA10_NH4OH80ACN.2083.2083.3.dta
3					2208	1	0	653.361	1304.71	2	1304.71	-0.0015	402	412	0	40.21	22	40	0.057	K	HLVDEPQNLIK	K				13	110328_WaxPromix10ulA10_NH4OH80ACN.2250.2250.2.dta
3					2209	1	0	653.361	1304.71	2	1304.71	-0.0015	402	412	0	32.61	21	40	0.33	K	HLVDEPQNLIK	K				7	110328_WaxPromix10ulA10_NH4OH80ACN.4219.4219.2.dta
3					2210	1	0	653.361	1304.71	2	1304.71	-0.0014	402	412	0	29.49	28	40	0.67	K	HLVDEPQNLIK	K				9	110328_WaxPromix10ulA10_NH4OH80ACN.1886.1886.2.dta
3					2211	3	0	435.91	1304.71	3	1304.71	-0.0014	402	412	0	27.48		40	1.1	K	HLVDEPQNLIK	K				12	110328_WaxPromix10ulA10_NH4OH80ACN.2198.2198.3.dta
3					2212	1	0	653.361	1304.71	2	1304.71	-0.0013	402	412	0	25.16	19	40	1.8	K	HLVDEPQNLIK	K				12	110328_WaxPromix10ulA10_NH4OH80ACN.5673.5673.2.dta
3					2213	1	0	653.361	1304.71	2	1304.71	-0.0012	402	412	0	32.82	20	40	0.31	K	HLVDEPQNLIK	K				12	110328_WaxPromix10ulA10_NH4OH80ACN.3815.3815.2.dta
3					2214	1	0	653.361	1304.71	2	1304.71	-0.001	402	412	0	31.71	21	40	0.42	K	HLVDEPQNLIK	K				12	110328_WaxPromix10ulA10_NH4OH80ACN.4994.4994.2.dta
3					2215	1	0	653.361	1304.71	2	1304.71	-0.0009	402	412	0	30.46	22	40	0.56	K	HLVDEPQNLIK	K				8	110328_WaxPromix10ulA10_NH4OH80ACN.4797.4797.2.dta
3					2216	1	0	435.91	1304.71	3	1304.71	-0.0008	402	412	0	30.88	38	40	0.51	K	HLVDEPQNLIK	K				10	110328_WaxPromix10ulA10_NH4OH80ACN.2140.2140.3.dta
3					2217	1	0	653.361	1304.71	2	1304.71	-0.0008	402	412	0	22.97	23	40	3.1	K	HLVDEPQNLIK	K				4	110328_WaxPromix10ulA10_NH4OH80ACN.5920.5920.2.dta
3					2218	1	0	653.361	1304.71	2	1304.71	-0.0008	402	412	0	50.08	26	40	0.0061	K	HLVDEPQNLIK	K				6	110328_WaxPromix10ulA10_NH4OH80ACN.2194.2194.2.dta
3					2219	1	0	653.361	1304.71	2	1304.71	-0.0007	402	412	0	28.37	20	40	0.91	K	HLVDEPQNLIK	K				10	110328_WaxPromix10ulA10_NH4OH80ACN.3417.3417.2.dta
3					2220	1	0	653.361	1304.71	2	1304.71	-0.0006	402	412	0	29.7	34	40	0.67	K	HLVDEPQNLIK	K				8	110328_WaxPromix10ulA10_NH4OH80ACN.4261.4261.2.dta
3					2221	1	0	653.361	1304.71	2	1304.71	-0.0006	402	412	0	33.82	21	40	0.26	K	HLVDEPQNLIK	K				5	110328_WaxPromix10ulA10_NH4OH80ACN.4702.4702.2.dta
3					2222	1	0	653.361	1304.71	2	1304.71	-0.0006	402	412	0	37.73	22	40	0.1	K	HLVDEPQNLIK	K				11	110328_WaxPromix10ulA10_NH4OH80ACN.2417.2417.2.dta
3					2223	1	0	653.361	1304.71	2	1304.71	-0.0005	402	412	0	44.79	26	40	0.02	K	HLVDEPQNLIK	K				8	110328_WaxPromix10ulA10_NH4OH80ACN.2304.2304.2.dta
3					2224	3	0	435.91	1304.71	3	1304.71	-0.0005	402	412	0	20.55	34	40	5.3	K	HLVDEPQNLIK	K				7	110328_WaxPromix10ulA10_NH4OH80ACN.2309.2309.3.dta
3					2225	1	0	653.361	1304.71	2	1304.71	-0.0004	402	412	0	22.37	14	40	3.4	K	HLVDEPQNLIK	K				16	110328_WaxPromix10ulA10_NH4OH80ACN.4657.4657.2.dta
3					2226	1	0	653.361	1304.71	2	1304.71	-0.0004	402	412	0	30.69	17	40	0.51	K	HLVDEPQNLIK	K				5	110328_WaxPromix10ulA10_NH4OH80ACN.3859.3859.2.dta
3					2227	1	0	653.361	1304.71	2	1304.71	-0.0004	402	412	0	34.19	19	40	0.23	K	HLVDEPQNLIK	K				5	110328_WaxPromix10ulA10_NH4OH80ACN.4005.4005.2.dta
3					2228	1	0	653.361	1304.71	2	1304.71	-0.0004	402	412	0	34.37	21	40	0.22	K	HLVDEPQNLIK	K				5	110328_WaxPromix10ulA10_NH4OH80ACN.4355.4355.2.dta
3					2229	1	0	653.362	1304.71	2	1304.71	-0.0002	402	412	0	31.57	32	40	0.42	K	HLVDEPQNLIK	K				5	110328_WaxPromix10ulA10_NH4OH80ACN.4827.4827.2.dta
3					2230	1	0	653.362	1304.71	2	1304.71	-0.0002	402	412	0	38.57	26	40	0.083	K	HLVDEPQNLIK	K				14	110328_WaxPromix10ulA10_NH4OH80ACN.2363.2363.2.dta
3					2231	1	0	653.362	1304.71	2	1304.71	0.0001	402	412	0	24.9	19	40	1.9	K	HLVDEPQNLIK	K				7	110328_WaxPromix10ulA10_NH4OH80ACN.4494.4494.2.dta
3					2232	1	0	653.362	1304.71	2	1304.71	0.0002	402	412	0	24.1	19	40	2.3	K	HLVDEPQNLIK	K				10	110328_WaxPromix10ulA10_NH4OH80ACN.4882.4882.2.dta
3					2233	1	0	653.362	1304.71	2	1304.71	0.0002	402	412	0	27.35	23	40	1.1	K	HLVDEPQNLIK	K				14	110328_WaxPromix10ulA10_NH4OH80ACN.4893.4893.2.dta
3					2234	1	0	653.362	1304.71	2	1304.71	0.0002	402	412	0	31.24	22	40	0.44	K	HLVDEPQNLIK	K				5	110328_WaxPromix10ulA10_NH4OH80ACN.3248.3248.2.dta
3					2235	1	0	653.362	1304.71	2	1304.71	0.0002	402	412	0	31.22	22	40	0.44	K	HLVDEPQNLIK	K				5	110328_WaxPromix10ulA10_NH4OH80ACN.4121.4121.2.dta
3					2236	1	0	653.362	1304.71	2	1304.71	0.0003	402	412	0	34.49	23	40	0.21	K	HLVDEPQNLIK	K				8	110328_WaxPromix10ulA10_NH4OH80ACN.4045.4045.2.dta
3					2237	1	0	653.362	1304.71	2	1304.71	0.0003	402	412	0	45.25	23	40	0.017	K	HLVDEPQNLIK	K				8	110328_WaxPromix10ulA10_NH4OH80ACN.2137.2137.2.dta
3					2238	1	0	653.362	1304.71	2	1304.71	0.0004	402	412	0	27.36	19	40	1.1	K	HLVDEPQNLIK	K				7	110328_WaxPromix10ulA10_NH4OH80ACN.4935.4935.2.dta
3					2239	1	0	653.362	1304.71	2	1304.71	0.0004	402	412	0	34.38	20	40	0.21	K	HLVDEPQNLIK	K				5	110328_WaxPromix10ulA10_NH4OH80ACN.4563.4563.2.dta
3					2240	1	0	653.362	1304.71	2	1304.71	0.0005	402	412	0	21.5	21	40	4.1	K	HLVDEPQNLIK	K				10	110328_WaxPromix10ulA10_NH4OH80ACN.5828.5828.2.dta
3					2241	1	0	653.362	1304.71	2	1304.71	0.0005	402	412	0	28.4	24	40	0.85	K	HLVDEPQNLIK	K				12	110328_WaxPromix10ulA10_NH4OH80ACN.5895.5895.2.dta
3					2242	1	0	653.362	1304.71	2	1304.71	0.0006	402	412	0	33.96	25	40	0.24	K	HLVDEPQNLIK	K				5	110328_WaxPromix10ulA10_NH4OH80ACN.4981.4981.2.dta
3					2243	1	0	653.362	1304.71	2	1304.71	0.0006	402	412	0	25.27	22	40	1.7	K	HLVDEPQNLIK	K				7	110328_WaxPromix10ulA10_NH4OH80ACN.3956.3956.2.dta
3					2244	1	0	653.362	1304.71	2	1304.71	0.0007	402	412	0	21.07	16	40	4.6	K	HLVDEPQNLIK	K				7	110328_WaxPromix10ulA10_NH4OH80ACN.3691.3691.2.dta
3					2245	1	0	653.362	1304.71	2	1304.71	0.0008	402	412	0	21.11	22	40	4.6	K	HLVDEPQNLIK	K				8	110328_WaxPromix10ulA10_NH4OH80ACN.6023.6023.2.dta
3					2246	1	0	653.362	1304.71	2	1304.71	0.0008	402	412	0	33.77	20	40	0.25	K	HLVDEPQNLIK	K				5	110328_WaxPromix10ulA10_NH4OH80ACN.4309.4309.2.dta
3					2247	1	0	653.362	1304.71	2	1304.71	0.001	402	412	0	37.24	21	40	0.1	K	HLVDEPQNLIK	K				7	110328_WaxPromix10ulA10_NH4OH80ACN.4748.4748.2.dta
3					2248	1	0	653.362	1304.71	2	1304.71	0.0011	402	412	0	24.63	22	39	1.7	K	HLVDEPQNLIK	K				12	110328_WaxPromix10ulA10_NH4OH80ACN.3909.3909.2.dta
3					2249	1	0	653.362	1304.71	2	1304.71	0.0014	402	412	0	25.3	21	39	1.5	K	HLVDEPQNLIK	K				8	110328_WaxPromix10ulA10_NH4OH80ACN.6607.6607.2.dta
3					2250	1	0	653.362	1304.71	2	1304.71	0.0014	402	412	0	37.88	28	39	0.081	K	HLVDEPQNLIK	K				8	110328_WaxPromix10ulA10_NH4OH80ACN.2538.2538.2.dta
3					2251	1	0	653.362	1304.71	2	1304.71	0.0014	402	412	0	22.86	18	39	2.6	K	HLVDEPQNLIK	K				7	110328_WaxPromix10ulA10_NH4OH80ACN.4613.4613.2.dta
3					2252	1	0	653.362	1304.71	2	1304.71	0.0015	402	412	0	25.18	19	40	1.7	K	HLVDEPQNLIK	K				7	110328_WaxPromix10ulA10_NH4OH80ACN.7191.7191.2.dta
3					2253	1	0	653.362	1304.71	2	1304.71	0.0015	402	412	0	32.47	25	40	0.31	K	HLVDEPQNLIK	K				12	110328_WaxPromix10ulA10_NH4OH80ACN.2595.2595.2.dta
3					2254	1	0	653.362	1304.71	2	1304.71	0.0016	402	412	0	31.41	19	40	0.4	K	HLVDEPQNLIK	K				5	110328_WaxPromix10ulA10_NH4OH80ACN.4397.4397.2.dta
3					2255	1	0	653.362	1304.71	2	1304.71	0.0016	402	412	0	20.55	20	40	4.8	K	HLVDEPQNLIK	K				4	110328_WaxPromix10ulA10_NH4OH80ACN.3737.3737.2.dta
3					2256	1	0	653.363	1304.71	2	1304.71	0.0019	402	412	0	31.04	15	40	0.43	K	HLVDEPQNLIK	K				5	110328_WaxPromix10ulA10_NH4OH80ACN.4097.4097.2.dta
3					2257	1	0	653.363	1304.71	2	1304.71	0.002	402	412	0	28.8	21	40	0.71	K	HLVDEPQNLIK	K				11	110328_WaxPromix10ulA10_NH4OH80ACN.5033.5033.2.dta
3					2258	1	0	653.363	1304.71	2	1304.71	0.002	402	412	0	25.1	20	40	1.7	K	HLVDEPQNLIK	K				7	110328_WaxPromix10ulA10_NH4OH80ACN.3629.3629.2.dta
3					2259	1	0	653.363	1304.71	2	1304.71	0.0022	402	412	0	29.12	20	40	0.66	K	HLVDEPQNLIK	K				7	110328_WaxPromix10ulA10_NH4OH80ACN.2795.2795.2.dta
3					2261	1	0	1305.72	1304.71	1	1304.71	0.003	402	412	0	31.25	25	40	0.4	K	HLVDEPQNLIK	K				10	110328_WaxPromix10ulA10_NH4OH80ACN.1957.1957.1.dta
3					2262	1	0	1305.72	1304.71	1	1304.71	0.0035	402	412	0	35.53	25	40	0.15	K	HLVDEPQNLIK	K				10	110328_WaxPromix10ulA10_NH4OH80ACN.1965.1965.1.dta
3					2263	1	0	653.364	1304.71	2	1304.71	0.0036	402	412	0	21.46	19	40	3.7	K	HLVDEPQNLIK	K				7	110328_WaxPromix10ulA10_NH4OH80ACN.5377.5377.2.dta
3					2264	1	0	653.364	1304.71	2	1304.71	0.0041	402	412	0	20.6	17	40	4.5	K	HLVDEPQNLIK	K				4	110328_WaxPromix10ulA10_NH4OH80ACN.3769.3769.2.dta
3					2267	1	0	436.238	1305.69	3	1305.69	-0.0021	402	412	0	25.24	34	41	2	K	HLVDEPQNLIK	K		Deamidated (NQ)	0.00000004000.0	11	110328_WaxPromix10ulA10_NH4OH80ACN.2849.2849.3.dta
3					2268	1	0	653.855	1305.69	2	1305.69	0.0017	402	412	0	37.22	29	41	0.13	K	HLVDEPQNLIK	K		Deamidated (NQ)	0.00000040000.0	11	110328_WaxPromix10ulA10_NH4OH80ACN.2497.2497.2.dta
3					2269	1	0	653.855	1305.69	2	1305.69	0.0019	402	412	0	45.32	25	41	0.019	K	HLVDEPQNLIK	K		Deamidated (NQ)	0.00000004000.0	6	110328_WaxPromix10ulA10_NH4OH80ACN.2861.2861.2.dta
3					2275	1	0	653.862	1305.71	2	1304.71	1.0012	402	412	0	33.41	27	40	0.27	K	HLVDEPQNLIK	K				8	110328_WaxPromix10ulA10_NH4OH80ACN.6827.6827.2.dta
3					2276	1	0	653.862	1305.71	2	1304.71	1.0013	402	412	0	46	27	40	0.015	K	HLVDEPQNLIK	K				9	110328_WaxPromix10ulA10_NH4OH80ACN.5709.5709.2.dta
3					2277	1	0	653.865	1305.72	2	1304.71	1.0071	402	412	0	23.45	30	39	2.1	K	HLVDEPQNLIK	K				10	110328_WaxPromix10ulA10_NH4OH80ACN.6875.6875.2.dta
3					2469	1	0	700.347	1398.68	2	1398.69	-0.0068	569	580	0	70.98	31	42	7.3e-05	K	TVMENFVAFVDK	C				9	110328_WaxPromix10ulA10_NH4OH80ACN.2082.2082.2.dta
3					2470	1	0	700.349	1398.68	2	1398.69	-0.0027	569	580	0	70.76	35	42	7.4e-05	K	TVMENFVAFVDK	C				9	110328_WaxPromix10ulA10_NH4OH80ACN.2136.2136.2.dta
3					2471	1	0	700.349	1398.68	2	1398.69	-0.0026	569	580	0	68.13	30	42	0.00013	K	TVMENFVAFVDK	C				9	110328_WaxPromix10ulA10_NH4OH80ACN.2246.2246.2.dta
3					2472	1	0	700.349	1398.68	2	1398.69	-0.0024	569	580	0	76.35	31	42	2e-05	K	TVMENFVAFVDK	C				9	110328_WaxPromix10ulA10_NH4OH80ACN.2191.2191.2.dta
3					2473	1	0	700.349	1398.68	2	1398.69	-0.002	569	580	0	65.54	31	42	0.00024	K	TVMENFVAFVDK	C				9	110328_WaxPromix10ulA10_NH4OH80ACN.2412.2412.2.dta
3					2474	1	0	700.349	1398.68	2	1398.69	-0.0019	569	580	0	55.54	32	42	0.0024	K	TVMENFVAFVDK	C				7	110328_WaxPromix10ulA10_NH4OH80ACN.7081.7081.2.dta
3					2475	1	0	700.349	1398.68	2	1398.69	-0.0017	569	580	0	53.4	27	42	0.0041	K	TVMENFVAFVDK	C				9	110328_WaxPromix10ulA10_NH4OH80ACN.2576.2576.2.dta
3					2476	1	0	700.349	1398.68	2	1398.69	-0.0016	569	580	0	70.92	34	42	7.6e-05	K	TVMENFVAFVDK	C				9	110328_WaxPromix10ulA10_NH4OH80ACN.2028.2028.2.dta
3					2477	1	0	700.349	1398.68	2	1398.69	-0.0015	569	580	0	51.94	33	42	0.006	K	TVMENFVAFVDK	C				8	110328_WaxPromix10ulA10_NH4OH80ACN.4123.4123.2.dta
3					2478	1	0	700.35	1398.68	2	1398.69	-0.0007	569	580	0	71	33	42	7.3e-05	K	TVMENFVAFVDK	C				9	110328_WaxPromix10ulA10_NH4OH80ACN.2302.2302.2.dta
3					2479	1	0	700.35	1398.68	2	1398.69	-0.0006	569	580	0	60.73	32	42	0.00078	K	TVMENFVAFVDK	C				9	110328_WaxPromix10ulA10_NH4OH80ACN.2357.2357.2.dta
3					2480	1	0	700.35	1398.68	2	1398.69	-0.0006	569	580	0	25.16	27	42	2.8	K	TVMENFVAFVDK	C				7	110328_WaxPromix10ulA10_NH4OH80ACN.3616.3616.2.dta
3					2481	1	0	700.35	1398.68	2	1398.69	-0.0006	569	580	0	29.54	21	42	1	K	TVMENFVAFVDK	C				9	110328_WaxPromix10ulA10_NH4OH80ACN.4787.4787.2.dta
3					2482	1	0	700.35	1398.68	2	1398.69	-0.0006	569	580	0	34.5	27	42	0.33	K	TVMENFVAFVDK	C				9	110328_WaxPromix10ulA10_NH4OH80ACN.3825.3825.2.dta
3					2483	1	0	700.35	1398.68	2	1398.69	-0.0004	569	580	0	40.99	23	42	0.073	K	TVMENFVAFVDK	C				8	110328_WaxPromix10ulA10_NH4OH80ACN.7093.7093.2.dta
3					2484	1	0	700.35	1398.68	2	1398.69	-0.0004	569	580	0	68.24	32	42	0.00013	K	TVMENFVAFVDK	C				9	110328_WaxPromix10ulA10_NH4OH80ACN.2688.2688.2.dta
3					2485	1	0	700.35	1398.68	2	1398.69	-0.0003	569	580	0	70.81	31	42	7.3e-05	K	TVMENFVAFVDK	C				9	110328_WaxPromix10ulA10_NH4OH80ACN.2466.2466.2.dta
3					2486	1	0	700.35	1398.69	2	1398.69	-0.0002	569	580	0	30.19	25	42	0.82	K	TVMENFVAFVDK	C				9	110328_WaxPromix10ulA10_NH4OH80ACN.4762.4762.2.dta
3					2487	1	0	700.35	1398.69	2	1398.69	-0.0001	569	580	0	35.43	22	42	0.25	K	TVMENFVAFVDK	C				9	110328_WaxPromix10ulA10_NH4OH80ACN.3287.3287.2.dta
3					2488	1	0	700.35	1398.69	2	1398.69	-0.0001	569	580	0	68.05	32	42	0.00013	K	TVMENFVAFVDK	C				9	110328_WaxPromix10ulA10_NH4OH80ACN.2633.2633.2.dta
3					2489	1	0	700.35	1398.69	2	1398.69	0.0001	569	580	0	37.42	27	42	0.16	K	TVMENFVAFVDK	C				8	110328_WaxPromix10ulA10_NH4OH80ACN.3717.3717.2.dta
3					2490	1	0	700.35	1398.69	2	1398.69	0.0002	569	580	0	70.55	29	42	7.7e-05	K	TVMENFVAFVDK	C				9	110328_WaxPromix10ulA10_NH4OH80ACN.2801.2801.2.dta
3					2491	1	0	700.35	1398.69	2	1398.69	0.0002	569	580	0	68.36	34	42	0.00013	K	TVMENFVAFVDK	C				10	110328_WaxPromix10ulA10_NH4OH80ACN.2522.2522.2.dta
3					2492	1	0	700.35	1398.69	2	1398.69	0.0006	569	580	0	60.19	27	42	0.00083	K	TVMENFVAFVDK	C				9	110328_WaxPromix10ulA10_NH4OH80ACN.3098.3098.2.dta
3					2493	1	0	700.35	1398.69	2	1398.69	0.0006	569	580	0	36.72	27	42	0.18	K	TVMENFVAFVDK	C				6	110328_WaxPromix10ulA10_NH4OH80ACN.3954.3954.2.dta
3					2494	1	0	700.35	1398.69	2	1398.69	0.0007	569	580	0	68.21	31	42	0.00014	K	TVMENFVAFVDK	C				9	110328_WaxPromix10ulA10_NH4OH80ACN.2854.2854.2.dta
3					2495	1	0	700.35	1398.69	2	1398.69	0.0008	569	580	0	61.87	27	42	0.00059	K	TVMENFVAFVDK	C				9	110328_WaxPromix10ulA10_NH4OH80ACN.3175.3175.2.dta
3					2496	1	0	700.35	1398.69	2	1398.69	0.0008	569	580	0	67.72	29	42	0.00015	K	TVMENFVAFVDK	C				9	110328_WaxPromix10ulA10_NH4OH80ACN.3054.3054.2.dta
3					2497	1	0	700.351	1398.69	2	1398.69	0.001	569	580	0	30.95	22	42	0.73	K	TVMENFVAFVDK	C				9	110328_WaxPromix10ulA10_NH4OH80ACN.3493.3493.2.dta
3					2498	1	0	700.351	1398.69	2	1398.69	0.001	569	580	0	44.01	26	42	0.036	K	TVMENFVAFVDK	C				9	110328_WaxPromix10ulA10_NH4OH80ACN.3625.3625.2.dta
3					2499	1	0	700.351	1398.69	2	1398.69	0.0012	569	580	0	31.83	25	42	0.59	K	TVMENFVAFVDK	C				9	110328_WaxPromix10ulA10_NH4OH80ACN.4290.4290.2.dta
3					2500	1	0	700.351	1398.69	2	1398.69	0.0012	569	580	0	42.55	25	42	0.05	K	TVMENFVAFVDK	C				6	110328_WaxPromix10ulA10_NH4OH80ACN.3897.3897.2.dta
3					2501	1	0	700.351	1398.69	2	1398.69	0.0013	569	580	0	62.47	29	42	0.00051	K	TVMENFVAFVDK	C				9	110328_WaxPromix10ulA10_NH4OH80ACN.2909.2909.2.dta
3					2502	1	0	700.351	1398.69	2	1398.69	0.0013	569	580	0	43.88	31	42	0.037	K	TVMENFVAFVDK	C				9	110328_WaxPromix10ulA10_NH4OH80ACN.3907.3907.2.dta
3					2503	1	0	700.351	1398.69	2	1398.69	0.0013	569	580	0	64.86	30	42	0.00029	K	TVMENFVAFVDK	C				9	110328_WaxPromix10ulA10_NH4OH80ACN.2964.2964.2.dta
3					2504	1	0	700.351	1398.69	2	1398.69	0.0015	569	580	0	37.98	24	42	0.14	K	TVMENFVAFVDK	C				9	110328_WaxPromix10ulA10_NH4OH80ACN.3814.3814.2.dta
3					2505	1	0	700.351	1398.69	2	1398.69	0.0015	569	580	0	67.96	30	42	0.00014	K	TVMENFVAFVDK	C				9	110328_WaxPromix10ulA10_NH4OH80ACN.2744.2744.2.dta
3					2506	1	0	700.351	1398.69	2	1398.69	0.0016	569	580	0	75.66	33	42	2.3e-05	K	TVMENFVAFVDK	C				10	110328_WaxPromix10ulA10_NH4OH80ACN.3010.3010.2.dta
3					2507	1	0	700.351	1398.69	2	1398.69	0.0016	569	580	0	32.78	25	42	0.45	K	TVMENFVAFVDK	C				6	110328_WaxPromix10ulA10_NH4OH80ACN.4050.4050.2.dta
3					2508	1	0	700.351	1398.69	2	1398.69	0.0017	569	580	0	42.32	22	42	0.051	K	TVMENFVAFVDK	C				8	110328_WaxPromix10ulA10_NH4OH80ACN.3738.3738.2.dta
3					2509	1	0	700.351	1398.69	2	1398.69	0.0017	569	580	0	56.15	27	42	0.0022	K	TVMENFVAFVDK	C				9	110328_WaxPromix10ulA10_NH4OH80ACN.3220.3220.2.dta
3					2510	1	0	700.351	1398.69	2	1398.69	0.0017	569	580	0	35.59	23	42	0.25	K	TVMENFVAFVDK	C				9	110328_WaxPromix10ulA10_NH4OH80ACN.3764.3764.2.dta
3					2511	1	0	700.351	1398.69	2	1398.69	0.0018	569	580	0	64.33	30	42	0.00033	K	TVMENFVAFVDK	C				9	110328_WaxPromix10ulA10_NH4OH80ACN.3266.3266.2.dta
3					2512	1	0	700.351	1398.69	2	1398.69	0.0022	569	580	0	44.12	34	42	0.034	K	TVMENFVAFVDK	C				9	110328_WaxPromix10ulA10_NH4OH80ACN.4004.4004.2.dta
3					2513	1	0	1399.7	1398.69	1	1398.69	0.0028	569	580	0	24.25	19	42	3.4	K	TVMENFVAFVDK	C				9	110328_WaxPromix10ulA10_NH4OH80ACN.2112.2112.1.dta
3					2514	1	0	700.351	1398.69	2	1398.69	0.0028	569	580	0	36.3	25	42	0.21	K	TVMENFVAFVDK	C				9	110328_WaxPromix10ulA10_NH4OH80ACN.3675.3675.2.dta
3					2515	1	0	1399.7	1398.69	1	1398.69	0.0068	569	580	0	29.99	19	42	0.87	K	TVMENFVAFVDK	C				10	110328_WaxPromix10ulA10_NH4OH80ACN.2056.2056.1.dta
3					2520	1	0	700.842	1399.67	2	1399.67	0.0009	569	580	0	63.62	28	43	0.00044	K	TVMENFVAFVDK	C		Deamidated (NQ)	0.000040000000.0	10	110328_WaxPromix10ulA10_NH4OH80ACN.3121.3121.2.dta
3					2521	1	0	700.842	1399.67	2	1399.67	0.0012	569	580	0	50.63	29	43	0.0086	K	TVMENFVAFVDK	C		Deamidated (NQ)	0.000040000000.0	9	110328_WaxPromix10ulA10_NH4OH80ACN.3162.3162.2.dta
3					2545	1	0	708.347	1414.68	2	1414.68	-0.0017	569	580	0	51.65	27	43	0.007	K	TVMENFVAFVDK	C		Oxidation (M)	0.001000000000.0	10	110328_WaxPromix10ulA10_NH4OH80ACN.2264.2264.2.dta
3					2557	1	0	473.901	1418.68	3	1418.69	-0.006	89	100	0	36.52	38	42	0.19	K	SLHTLFGDELCK	V				12	110328_WaxPromix10ulA10_NH4OH80ACN.2103.2103.3.dta
3					2558	1	0	473.901	1418.68	3	1418.69	-0.0056	89	100	0	34.79	29	42	0.28	K	SLHTLFGDELCK	V				13	110328_WaxPromix10ulA10_NH4OH80ACN.2158.2158.3.dta
3					2559	1	0	710.348	1418.68	2	1418.69	-0.0044	89	100	0	66.1	30	42	0.00022	K	SLHTLFGDELCK	V				15	110328_WaxPromix10ulA10_NH4OH80ACN.2115.2115.2.dta
3					2560	1	0	473.901	1418.68	3	1418.69	-0.0039	89	100	0	23.36	31	42	3.9	K	SLHTLFGDELCK	V				6	110328_WaxPromix10ulA10_NH4OH80ACN.6864.6864.3.dta
3					2561	1	0	710.349	1418.68	2	1418.69	-0.0034	89	100	0	68.39	27	42	0.00012	K	SLHTLFGDELCK	V				15	110328_WaxPromix10ulA10_NH4OH80ACN.2170.2170.2.dta
3					2562	1	0	473.902	1418.68	3	1418.69	-0.0032	89	100	0	24.09	27	42	3.6	K	SLHTLFGDELCK	V				12	110328_WaxPromix10ulA10_NH4OH80ACN.7233.7233.3.dta
3					2563	1	0	473.902	1418.68	3	1418.69	-0.0031	89	100	0	46.3	35	42	0.022	K	SLHTLFGDELCK	V				8	110328_WaxPromix10ulA10_NH4OH80ACN.2216.2216.3.dta
3					2565	1	0	473.902	1418.68	3	1418.69	-0.0025	89	100	0	28.97	26	42	1.1	K	SLHTLFGDELCK	V				11	110328_WaxPromix10ulA10_NH4OH80ACN.4158.4158.3.dta
3					2566	1	0	473.902	1418.68	3	1418.69	-0.0023	89	100	0	28.38	34	42	1.3	K	SLHTLFGDELCK	V				10	110328_WaxPromix10ulA10_NH4OH80ACN.4445.4445.3.dta
3					2567	1	0	473.902	1418.68	3	1418.69	-0.0022	89	100	0	35.75	28	42	0.24	K	SLHTLFGDELCK	V				8	110328_WaxPromix10ulA10_NH4OH80ACN.4955.4955.3.dta
3					2568	1	0	473.902	1418.68	3	1418.69	-0.0022	89	100	0	25.67	27	42	2.4	K	SLHTLFGDELCK	V				7	110328_WaxPromix10ulA10_NH4OH80ACN.4681.4681.3.dta
3					2569	1	0	473.902	1418.68	3	1418.69	-0.0021	89	100	0	37.68	33	42	0.15	K	SLHTLFGDELCK	V				8	110328_WaxPromix10ulA10_NH4OH80ACN.3238.3238.3.dta
3					2570	1	0	473.902	1418.68	3	1418.69	-0.0021	89	100	0	23.03	28	42	4.5	K	SLHTLFGDELCK	V				6	110328_WaxPromix10ulA10_NH4OH80ACN.6928.6928.3.dta
3					2571	1	0	473.902	1418.68	3	1418.69	-0.002	89	100	0	35.88	31	42	0.23	K	SLHTLFGDELCK	V				12	110328_WaxPromix10ulA10_NH4OH80ACN.4104.4104.3.dta
3					2572	1	0	473.902	1418.68	3	1418.69	-0.002	89	100	0	43.31	34	42	0.042	K	SLHTLFGDELCK	V				8	110328_WaxPromix10ulA10_NH4OH80ACN.2382.2382.3.dta
3					2573	1	0	473.902	1418.68	3	1418.69	-0.002	89	100	0	35	36	42	0.29	K	SLHTLFGDELCK	V				14	110328_WaxPromix10ulA10_NH4OH80ACN.4819.4819.3.dta
3					2574	1	0	473.902	1418.68	3	1418.69	-0.002	89	100	0	32.62	27	42	0.49	K	SLHTLFGDELCK	V				7	110328_WaxPromix10ulA10_NH4OH80ACN.4909.4909.3.dta
3					2575	1	0	473.902	1418.68	3	1418.69	-0.002	89	100	0	36.95	29	42	0.18	K	SLHTLFGDELCK	V				7	110328_WaxPromix10ulA10_NH4OH80ACN.2544.2544.3.dta
3					2576	1	0	473.902	1418.68	3	1418.69	-0.0019	89	100	0	29.89	28	42	0.92	K	SLHTLFGDELCK	V				7	110328_WaxPromix10ulA10_NH4OH80ACN.3923.3923.3.dta
3					2577	1	0	473.902	1418.68	3	1418.69	-0.0019	89	100	0	37.27	29	42	0.17	K	SLHTLFGDELCK	V				12	110328_WaxPromix10ulA10_NH4OH80ACN.2270.2270.3.dta
3					2578	1	0	710.35	1418.68	2	1418.69	-0.0019	89	100	0	48.67	28	42	0.012	K	SLHTLFGDELCK	V				8	110328_WaxPromix10ulA10_NH4OH80ACN.2552.2552.2.dta
3					2579	1	0	473.902	1418.68	3	1418.69	-0.0019	89	100	0	33.95	27	42	0.36	K	SLHTLFGDELCK	V				13	110328_WaxPromix10ulA10_NH4OH80ACN.2053.2053.3.dta
3					2580	1	0	473.902	1418.68	3	1418.69	-0.0018	89	100	0	35.48	34	42	0.26	K	SLHTLFGDELCK	V				12	110328_WaxPromix10ulA10_NH4OH80ACN.5281.5281.3.dta
3					2581	1	0	473.902	1418.68	3	1418.69	-0.0017	89	100	0	33.13	29	42	0.45	K	SLHTLFGDELCK	V				8	110328_WaxPromix10ulA10_NH4OH80ACN.5000.5000.3.dta
3					2582	1	0	473.902	1418.68	3	1418.69	-0.0017	89	100	0	31.35	31	42	0.68	K	SLHTLFGDELCK	V				7	110328_WaxPromix10ulA10_NH4OH80ACN.4204.4204.3.dta
3					2583	1	0	473.902	1418.68	3	1418.69	-0.0017	89	100	0	40.91	34	42	0.074	K	SLHTLFGDELCK	V				7	110328_WaxPromix10ulA10_NH4OH80ACN.2824.2824.3.dta
3					2584	1	0	473.902	1418.68	3	1418.69	-0.0016	89	100	0	30.1	28	42	0.89	K	SLHTLFGDELCK	V				7	110328_WaxPromix10ulA10_NH4OH80ACN.6359.6359.3.dta
3					2585	1	0	473.902	1418.68	3	1418.69	-0.0015	89	100	0	20.59	29	42	7.9	K	SLHTLFGDELCK	V				7	110328_WaxPromix10ulA10_NH4OH80ACN.6565.6565.3.dta
3					2586	1	0	473.902	1418.68	3	1418.69	-0.0015	89	100	0	35.13	29	42	0.28	K	SLHTLFGDELCK	V				14	110328_WaxPromix10ulA10_NH4OH80ACN.2770.2770.3.dta
3					2587	1	0	473.902	1418.68	3	1418.69	-0.0015	89	100	0	22.64	33	42	4.9	K	SLHTLFGDELCK	V				7	110328_WaxPromix10ulA10_NH4OH80ACN.5967.5967.3.dta
3					2588	1	0	473.902	1418.68	3	1418.69	-0.0015	89	100	0	42.93	36	42	0.046	K	SLHTLFGDELCK	V				7	110328_WaxPromix10ulA10_NH4OH80ACN.4772.4772.3.dta
3					2589	1	0	473.902	1418.68	3	1418.69	-0.0015	89	100	0	35.34	33	42	0.26	K	SLHTLFGDELCK	V				13	110328_WaxPromix10ulA10_NH4OH80ACN.2324.2324.3.dta
3					2590	1	0	473.902	1418.68	3	1418.69	-0.0015	89	100	0	48.26	29	42	0.013	K	SLHTLFGDELCK	V				9	110328_WaxPromix10ulA10_NH4OH80ACN.3190.3190.3.dta
3					2591	1	0	473.902	1418.68	3	1418.69	-0.0015	89	100	0	29.61	27	42	0.99	K	SLHTLFGDELCK	V				7	110328_WaxPromix10ulA10_NH4OH80ACN.3874.3874.3.dta
3					2592	1	0	473.902	1418.68	3	1418.69	-0.0014	89	100	0	31.8	27	42	0.6	K	SLHTLFGDELCK	V				7	110328_WaxPromix10ulA10_NH4OH80ACN.5046.5046.3.dta
3					2593	1	0	473.902	1418.68	3	1418.69	-0.0014	89	100	0	36.67	28	42	0.19	K	SLHTLFGDELCK	V				11	110328_WaxPromix10ulA10_NH4OH80ACN.2600.2600.3.dta
3					2594	1	0	473.902	1418.69	3	1418.69	-0.0013	89	100	0	29.09	25	42	1.1	K	SLHTLFGDELCK	V				7	110328_WaxPromix10ulA10_NH4OH80ACN.4725.4725.3.dta
3					2595	1	0	473.902	1418.69	3	1418.69	-0.0013	89	100	0	27.18	28	42	1.7	K	SLHTLFGDELCK	V				7	110328_WaxPromix10ulA10_NH4OH80ACN.4298.4298.3.dta
3					2596	1	0	473.902	1418.69	3	1418.69	-0.0012	89	100	0	29.01	31	42	1.1	K	SLHTLFGDELCK	V				12	110328_WaxPromix10ulA10_NH4OH80ACN.3683.3683.3.dta
3					2597	1	0	473.902	1418.69	3	1418.69	-0.0011	89	100	0	27.18	29	42	1.7	K	SLHTLFGDELCK	V				9	110328_WaxPromix10ulA10_NH4OH80ACN.5687.5687.3.dta
3					2598	1	0	473.902	1418.69	3	1418.69	-0.0011	89	100	0	45.63	31	42	0.025	K	SLHTLFGDELCK	V				8	110328_WaxPromix10ulA10_NH4OH80ACN.3049.3049.3.dta
3					2599	1	0	473.902	1418.69	3	1418.69	-0.0011	89	100	0	29.69	29	42	0.97	K	SLHTLFGDELCK	V				7	110328_WaxPromix10ulA10_NH4OH80ACN.5236.5236.3.dta
3					2600	1	0	473.902	1418.69	3	1418.69	-0.0011	89	100	0	26.25	32	42	2.1	K	SLHTLFGDELCK	V				7	110328_WaxPromix10ulA10_NH4OH80ACN.5922.5922.3.dta
3					2601	1	0	473.902	1418.69	3	1418.69	-0.001	89	100	0	30.98	29	42	0.71	K	SLHTLFGDELCK	V				8	110328_WaxPromix10ulA10_NH4OH80ACN.5868.5868.3.dta
3					2602	1	0	473.902	1418.69	3	1418.69	-0.001	89	100	0	33.46	33	42	0.4	K	SLHTLFGDELCK	V				8	110328_WaxPromix10ulA10_NH4OH80ACN.3824.3824.3.dta
3					2603	1	0	473.902	1418.69	3	1418.69	-0.0009	89	100	0	35.25	32	42	0.27	K	SLHTLFGDELCK	V				14	110328_WaxPromix10ulA10_NH4OH80ACN.2714.2714.3.dta
3					2604	1	0	473.902	1418.69	3	1418.69	-0.0009	89	100	0	32.9	23	42	0.46	K	SLHTLFGDELCK	V				8	110328_WaxPromix10ulA10_NH4OH80ACN.6480.6480.3.dta
3					2605	1	0	473.902	1418.69	3	1418.69	-0.0008	89	100	0	36.47	36	42	0.21	K	SLHTLFGDELCK	V				7	110328_WaxPromix10ulA10_NH4OH80ACN.3967.3967.3.dta
3					2606	1	0	473.902	1418.69	3	1418.69	-0.0008	89	100	0	34.14	28	42	0.35	K	SLHTLFGDELCK	V				7	110328_WaxPromix10ulA10_NH4OH80ACN.7058.7058.3.dta
3					2607	1	0	473.902	1418.69	3	1418.69	-0.0008	89	100	0	29.74	34	42	0.97	K	SLHTLFGDELCK	V				14	110328_WaxPromix10ulA10_NH4OH80ACN.3293.3293.3.dta
3					2608	1	0	473.902	1418.69	3	1418.69	-0.0007	89	100	0	52.9	37	42	0.0047	K	SLHTLFGDELCK	V				13	110328_WaxPromix10ulA10_NH4OH80ACN.3128.3128.3.dta
3					2609	1	0	473.902	1418.69	3	1418.69	-0.0007	89	100	0	27.14	30	42	1.8	K	SLHTLFGDELCK	V				7	110328_WaxPromix10ulA10_NH4OH80ACN.4012.4012.3.dta
3					2610	1	0	473.902	1418.69	3	1418.69	-0.0007	89	100	0	38.07	32	42	0.14	K	SLHTLFGDELCK	V				16	110328_WaxPromix10ulA10_NH4OH80ACN.2947.2947.3.dta
3					2611	1	0	473.902	1418.69	3	1418.69	-0.0006	89	100	0	33.7	33	42	0.39	K	SLHTLFGDELCK	V				14	110328_WaxPromix10ulA10_NH4OH80ACN.2883.2883.3.dta
3					2612	1	0	473.902	1418.69	3	1418.69	-0.0006	89	100	0	34.93	31	42	0.3	K	SLHTLFGDELCK	V				8	110328_WaxPromix10ulA10_NH4OH80ACN.4057.4057.3.dta
3					2613	1	0	473.902	1418.69	3	1418.69	-0.0006	89	100	0	30.79	30	42	0.77	K	SLHTLFGDELCK	V				7	110328_WaxPromix10ulA10_NH4OH80ACN.3637.3637.3.dta
3					2614	1	0	473.903	1418.69	3	1418.69	-0.0006	89	100	0	35.6	29	42	0.25	K	SLHTLFGDELCK	V				8	110328_WaxPromix10ulA10_NH4OH80ACN.5352.5352.3.dta
3					2615	1	0	473.903	1418.69	3	1418.69	-0.0005	89	100	0	33.65	29	42	0.4	K	SLHTLFGDELCK	V				7	110328_WaxPromix10ulA10_NH4OH80ACN.4344.4344.3.dta
3					2616	1	0	473.903	1418.69	3	1418.69	-0.0005	89	100	0	41.26	33	42	0.069	K	SLHTLFGDELCK	V				7	110328_WaxPromix10ulA10_NH4OH80ACN.2492.2492.3.dta
3					2617	1	0	473.903	1418.69	3	1418.69	-0.0005	89	100	0	35.06	30	42	0.29	K	SLHTLFGDELCK	V				11	110328_WaxPromix10ulA10_NH4OH80ACN.4491.4491.3.dta
3					2618	1	0	473.903	1418.69	3	1418.69	-0.0005	89	100	0	33.34	28	42	0.43	K	SLHTLFGDELCK	V				12	110328_WaxPromix10ulA10_NH4OH80ACN.2650.2650.3.dta
3					2619	1	0	473.903	1418.69	3	1418.69	-0.0004	89	100	0	40	33	42	0.092	K	SLHTLFGDELCK	V				7	110328_WaxPromix10ulA10_NH4OH80ACN.2437.2437.3.dta
3					2620	1	0	473.903	1418.69	3	1418.69	-0.0004	89	100	0	35.61		42	0.25	K	SLHTLFGDELCK	V				7	110328_WaxPromix10ulA10_NH4OH80ACN.4862.4862.3.dta
3					2621	1	0	710.35	1418.69	2	1418.69	-0.0003	89	100	0	46.88	26	42	0.019	K	SLHTLFGDELCK	V				8	110328_WaxPromix10ulA10_NH4OH80ACN.2281.2281.2.dta
3					2622	1	0	710.35	1418.69	2	1418.69	-0.0003	89	100	0	55.37	27	42	0.0026	K	SLHTLFGDELCK	V				16	110328_WaxPromix10ulA10_NH4OH80ACN.2060.2060.2.dta
3					2623	1	0	710.35	1418.69	2	1418.69	-0.0003	89	100	0	63.71	27	42	0.00038	K	SLHTLFGDELCK	V				9	110328_WaxPromix10ulA10_NH4OH80ACN.2225.2225.2.dta
3					2624	1	0	473.903	1418.69	3	1418.69	-0.0003	89	100	0	35.82	27	42	0.24	K	SLHTLFGDELCK	V				7	110328_WaxPromix10ulA10_NH4OH80ACN.4538.4538.3.dta
3					2625	1	0	473.903	1418.69	3	1418.69	-0.0002	89	100	0	36	37	42	0.23	K	SLHTLFGDELCK	V				12	110328_WaxPromix10ulA10_NH4OH80ACN.3729.3729.3.dta
3					2626	1	0	473.903	1418.69	3	1418.69	-0.0002	89	100	0	38.04	27	42	0.14	K	SLHTLFGDELCK	V				8	110328_WaxPromix10ulA10_NH4OH80ACN.6874.6874.3.dta
3					2627	1	0	473.903	1418.69	3	1418.69	-0.0001	89	100	0	32.09	27	42	0.55	K	SLHTLFGDELCK	V				7	110328_WaxPromix10ulA10_NH4OH80ACN.6526.6526.3.dta
3					2628	1	0	473.903	1418.69	3	1418.69	0	89	100	0	34.97	34	42	0.28	K	SLHTLFGDELCK	V				8	110328_WaxPromix10ulA10_NH4OH80ACN.3349.3349.3.dta
3					2629	1	0	473.903	1418.69	3	1418.69	0.0001	89	100	0	29.58	33	42	0.98	K	SLHTLFGDELCK	V				11	110328_WaxPromix10ulA10_NH4OH80ACN.7188.7188.3.dta
3					2630	1	0	473.903	1418.69	3	1418.69	0.0003	89	100	0	25.26	30	42	2.6	K	SLHTLFGDELCK	V				7	110328_WaxPromix10ulA10_NH4OH80ACN.4636.4636.3.dta
3					2631	1	0	473.903	1418.69	3	1418.69	0.0004	89	100	0	35.5	30	42	0.25	K	SLHTLFGDELCK	V				7	110328_WaxPromix10ulA10_NH4OH80ACN.4394.4394.3.dta
3					2632	1	0	473.903	1418.69	3	1418.69	0.0005	89	100	0	32.31	31	42	0.52	K	SLHTLFGDELCK	V				10	110328_WaxPromix10ulA10_NH4OH80ACN.3594.3594.3.dta
3					2633	1	0	473.903	1418.69	3	1418.69	0.0005	89	100	0	31.74	25	42	0.6	K	SLHTLFGDELCK	V				7	110328_WaxPromix10ulA10_NH4OH80ACN.4251.4251.3.dta
3					2635	1	0	710.351	1418.69	2	1418.69	0.0008	89	100	0	50.61	28	42	0.0078	K	SLHTLFGDELCK	V				9	110328_WaxPromix10ulA10_NH4OH80ACN.2405.2405.2.dta
3					2636	1	0	473.903	1418.69	3	1418.69	0.0009	89	100	0	37.29	28	42	0.17	K	SLHTLFGDELCK	V				14	110328_WaxPromix10ulA10_NH4OH80ACN.3779.3779.3.dta
3					2637	1	0	473.903	1418.69	3	1418.69	0.0009	89	100	0	29.74	28	42	0.95	K	SLHTLFGDELCK	V				7	110328_WaxPromix10ulA10_NH4OH80ACN.4585.4585.3.dta
3					2638	1	0	710.351	1418.69	2	1418.69	0.001	89	100	0	48.3	36	42	0.013	K	SLHTLFGDELCK	V				8	110328_WaxPromix10ulA10_NH4OH80ACN.2339.2339.2.dta
3					2639	1	0	473.903	1418.69	3	1418.69	0.0011	89	100	0	31.99	29	42	0.57	K	SLHTLFGDELCK	V				12	110328_WaxPromix10ulA10_NH4OH80ACN.3548.3548.3.dta
3					2640	1	0	473.903	1418.69	3	1418.69	0.0018	89	100	0	30	26	42	0.86	K	SLHTLFGDELCK	V				7	110328_WaxPromix10ulA10_NH4OH80ACN.5826.5826.3.dta
3					2641	1	0	710.352	1418.69	2	1418.69	0.0029	89	100	0	52.16	28	42	0.0057	K	SLHTLFGDELCK	V				15	110328_WaxPromix10ulA10_NH4OH80ACN.2464.2464.2.dta
3					2642	1	0	473.904	1418.69	3	1418.69	0.0034	89	100	0	34.96	28	42	0.29	K	SLHTLFGDELCK	V				7	110328_WaxPromix10ulA10_NH4OH80ACN.2993.2993.3.dta
3					2643	1	0	1419.7	1418.69	1	1418.69	0.0042	89	100	0	72.19	32	42	5.2e-05	K	SLHTLFGDELCK	V				12	110328_WaxPromix10ulA10_NH4OH80ACN.2098.2098.1.dta
3					2650	1	0	474.235	1419.68	3	1418.69	0.9981	89	100	0	25.72	31	42	2.5	K	SLHTLFGDELCK	V				7	110328_WaxPromix10ulA10_NH4OH80ACN.6454.6454.3.dta
3					2652	1	0	474.236	1419.69	3	1418.69	1.0012	89	100	0	28.8	28	42	1.2	K	SLHTLFGDELCK	V				14	110328_WaxPromix10ulA10_NH4OH80ACN.6583.6583.3.dta
3					2653	1	0	474.237	1419.69	3	1418.69	1.004	89	100	0	27.48	25	42	1.6	K	SLHTLFGDELCK	V				11	110328_WaxPromix10ulA10_NH4OH80ACN.7184.7184.3.dta
3					2686	1	0	360.707	1438.8	4	1438.8	-0.0037	360	371	1	50.48	35	38	0.0029	R	RHPEYAVSVLLR	L				9	110328_WaxPromix10ulA10_NH4OH80ACN.2265.2265.4.dta
3					2687	1	0	360.708	1438.8	4	1438.8	-0.0032	360	371	1	39.42	35	38	0.038	R	RHPEYAVSVLLR	L				7	110328_WaxPromix10ulA10_NH4OH80ACN.2068.2068.4.dta
3					2688	1	0	480.608	1438.8	3	1438.8	-0.0027	360	371	1	57.91	29	38	0.00052	R	RHPEYAVSVLLR	L				14	110328_WaxPromix10ulA10_NH4OH80ACN.3100.3100.3.dta
3					2689	1	0	360.708	1438.8	4	1438.8	-0.0026	360	371	1	40.82	34	38	0.027	R	RHPEYAVSVLLR	L				9	110328_WaxPromix10ulA10_NH4OH80ACN.1896.1896.4.dta
3					2690	1	0	480.608	1438.8	3	1438.8	-0.0026	360	371	1	71.12		38	2.5e-05	R	RHPEYAVSVLLR	L				9	110328_WaxPromix10ulA10_NH4OH80ACN.2249.2249.3.dta
3					2691	1	0	480.608	1438.8	3	1438.8	-0.0025	360	371	1	61.19	34	38	0.00024	R	RHPEYAVSVLLR	L				9	110328_WaxPromix10ulA10_NH4OH80ACN.2031.2031.3.dta
3					2692	1	0	480.608	1438.8	3	1438.8	-0.0023	360	371	1	61.79	31	38	0.00022	R	RHPEYAVSVLLR	L				10	110328_WaxPromix10ulA10_NH4OH80ACN.2414.2414.3.dta
3					2693	1	0	480.608	1438.8	3	1438.8	-0.0022	360	371	1	61.06	29	38	0.00026	R	RHPEYAVSVLLR	L				12	110328_WaxPromix10ulA10_NH4OH80ACN.2577.2577.3.dta
3					2694	1	0	360.708	1438.8	4	1438.8	-0.0021	360	371	1	49.25		38	0.0039	R	RHPEYAVSVLLR	L				9	110328_WaxPromix10ulA10_NH4OH80ACN.2154.2154.4.dta
3					2695	1	0	480.608	1438.8	3	1438.8	-0.0019	360	371	1	71.55		38	2.3e-05	R	RHPEYAVSVLLR	L				10	110328_WaxPromix10ulA10_NH4OH80ACN.1915.1915.3.dta
3					2696	1	0	480.608	1438.8	3	1438.8	-0.0018	360	371	1	66.64	35	38	7.1e-05	R	RHPEYAVSVLLR	L				10	110328_WaxPromix10ulA10_NH4OH80ACN.2802.2802.3.dta
3					2697	1	0	480.608	1438.8	3	1438.8	-0.0018	360	371	1	55.97	36	38	0.00082	R	RHPEYAVSVLLR	L				9	110328_WaxPromix10ulA10_NH4OH80ACN.2084.2084.3.dta
3					2698	1	0	480.608	1438.8	3	1438.8	-0.0017	360	371	1	71.82	33	38	2.1e-05	R	RHPEYAVSVLLR	L				10	110328_WaxPromix10ulA10_NH4OH80ACN.1806.1806.3.dta
3					2699	1	0	720.409	1438.8	2	1438.8	-0.0017	360	371	1	35.74	26	38	0.087	R	RHPEYAVSVLLR	L				11	110328_WaxPromix10ulA10_NH4OH80ACN.2262.2262.2.dta
3					2700	1	0	480.608	1438.8	3	1438.8	-0.0016	360	371	1	71.54	34	38	2.3e-05	R	RHPEYAVSVLLR	L				10	110328_WaxPromix10ulA10_NH4OH80ACN.2634.2634.3.dta
3					2701	1	0	480.608	1438.8	3	1438.8	-0.0016	360	371	1	71.69		37	2.1e-05	R	RHPEYAVSVLLR	L				9	110328_WaxPromix10ulA10_NH4OH80ACN.2303.2303.3.dta
3					2702	1	0	480.608	1438.8	3	1438.8	-0.0016	360	371	1	63.33	31	37	0.00015	R	RHPEYAVSVLLR	L				9	110328_WaxPromix10ulA10_NH4OH80ACN.2915.2915.3.dta
3					2703	1	0	480.608	1438.8	3	1438.8	-0.0015	360	371	1	42.77	32	37	0.016	R	RHPEYAVSVLLR	L				8	110328_WaxPromix10ulA10_NH4OH80ACN.3187.3187.3.dta
3					2704	1	0	480.608	1438.8	3	1438.8	-0.0014	360	371	1	41.27	28	37	0.023	R	RHPEYAVSVLLR	L				8	110328_WaxPromix10ulA10_NH4OH80ACN.3372.3372.3.dta
3					2705	1	0	480.608	1438.8	3	1438.8	-0.0013	360	371	1	60.8		37	0.00026	R	RHPEYAVSVLLR	L				12	110328_WaxPromix10ulA10_NH4OH80ACN.2469.2469.3.dta
3					2706	1	0	480.608	1438.8	3	1438.8	-0.0013	360	371	1	50.9	29	37	0.0025	R	RHPEYAVSVLLR	L				9	110328_WaxPromix10ulA10_NH4OH80ACN.2193.2193.3.dta
3					2707	1	0	720.409	1438.8	2	1438.8	-0.0013	360	371	1	24.62	22	37	1.1	R	RHPEYAVSVLLR	L				12	110328_WaxPromix10ulA10_NH4OH80ACN.2087.2087.2.dta
3					2708	1	0	480.608	1438.8	3	1438.8	-0.0012	360	371	1	62.03	32	37	0.00019	R	RHPEYAVSVLLR	L				15	110328_WaxPromix10ulA10_NH4OH80ACN.1973.1973.3.dta
3					2709	1	0	480.608	1438.8	3	1438.8	-0.0011	360	371	1	71.08	33	37	2.4e-05	R	RHPEYAVSVLLR	L				9	110328_WaxPromix10ulA10_NH4OH80ACN.1698.1698.3.dta
3					2710	1	0	480.608	1438.8	3	1438.8	-0.001	360	371	1	68.33		37	4.5e-05	R	RHPEYAVSVLLR	L				15	110328_WaxPromix10ulA10_NH4OH80ACN.1861.1861.3.dta
3					2711	1	0	480.608	1438.8	3	1438.8	-0.001	360	371	1	65.84		37	8.1e-05	R	RHPEYAVSVLLR	L				15	110328_WaxPromix10ulA10_NH4OH80ACN.2526.2526.3.dta
3					2712	1	0	480.608	1438.8	3	1438.8	-0.0008	360	371	1	51.03	35	37	0.0024	R	RHPEYAVSVLLR	L				8	110328_WaxPromix10ulA10_NH4OH80ACN.3654.3654.3.dta
3					2713	1	0	720.409	1438.8	2	1438.8	-0.0008	360	371	1	61.72	29	37	0.00021	R	RHPEYAVSVLLR	L				15	110328_WaxPromix10ulA10_NH4OH80ACN.1939.1939.2.dta
3					2714	1	0	720.409	1438.8	2	1438.8	-0.0008	360	371	1	49.37		37	0.0036	R	RHPEYAVSVLLR	L				13	110328_WaxPromix10ulA10_NH4OH80ACN.1887.1887.2.dta
3					2715	1	0	480.608	1438.8	3	1438.8	-0.0007	360	371	1	60.93		37	0.00025	R	RHPEYAVSVLLR	L				12	110328_WaxPromix10ulA10_NH4OH80ACN.2690.2690.3.dta
3					2716	1	0	480.609	1438.8	3	1438.8	-0.0005	360	371	1	64.88	31	37	0.0001	R	RHPEYAVSVLLR	L				14	110328_WaxPromix10ulA10_NH4OH80ACN.2360.2360.3.dta
3					2717	1	0	480.609	1438.8	3	1438.8	-0.0004	360	371	1	73.26	32	37	1.4e-05	R	RHPEYAVSVLLR	L				13	110328_WaxPromix10ulA10_NH4OH80ACN.3056.3056.3.dta
3					2718	1	0	480.609	1438.8	3	1438.8	-0.0003	360	371	1	63.83		37	0.00013	R	RHPEYAVSVLLR	L				15	110328_WaxPromix10ulA10_NH4OH80ACN.3013.3013.3.dta
3					2719	1	0	480.609	1438.8	3	1438.8	-0.0002	360	371	1	61.17		37	0.00023	R	RHPEYAVSVLLR	L				12	110328_WaxPromix10ulA10_NH4OH80ACN.1754.1754.3.dta
3					2720	1	0	720.409	1438.8	2	1438.8	-0.0001	360	371	1	42.71	25	37	0.017	R	RHPEYAVSVLLR	L				16	110328_WaxPromix10ulA10_NH4OH80ACN.2211.2211.2.dta
3					2721	1	0	480.609	1438.8	3	1438.8	-0.0001	360	371	1	41.8	30	37	0.02	R	RHPEYAVSVLLR	L				8	110328_WaxPromix10ulA10_NH4OH80ACN.2139.2139.3.dta
3					2722	1	0	480.609	1438.8	3	1438.8	0	360	371	1	59.11		37	0.00038	R	RHPEYAVSVLLR	L				9	110328_WaxPromix10ulA10_NH4OH80ACN.2970.2970.3.dta
3					2723	1	0	480.609	1438.8	3	1438.8	0.0002	360	371	1	53.13	31	37	0.0013	R	RHPEYAVSVLLR	L				7	110328_WaxPromix10ulA10_NH4OH80ACN.3586.3586.3.dta
3					2724	1	0	480.609	1438.8	3	1438.8	0.0004	360	371	1	62.6		37	0.00015	R	RHPEYAVSVLLR	L				15	110328_WaxPromix10ulA10_NH4OH80ACN.3231.3231.3.dta
3					2725	1	0	480.609	1438.81	3	1438.8	0.0005	360	371	1	49.89	30	37	0.0027	R	RHPEYAVSVLLR	L				16	110328_WaxPromix10ulA10_NH4OH80ACN.3143.3143.3.dta
3					2726	1	0	480.609	1438.81	3	1438.8	0.0005	360	371	1	46.85	29	37	0.0055	R	RHPEYAVSVLLR	L				7	110328_WaxPromix10ulA10_NH4OH80ACN.3783.3783.3.dta
3					2727	1	0	480.609	1438.81	3	1438.8	0.0005	360	371	1	53.99	31	37	0.0011	R	RHPEYAVSVLLR	L				9	110328_WaxPromix10ulA10_NH4OH80ACN.2858.2858.3.dta
3					2728	1	0	720.41	1438.81	2	1438.8	0.0006	360	371	1	29.14	23	37	0.32	R	RHPEYAVSVLLR	L				8	110328_WaxPromix10ulA10_NH4OH80ACN.2321.2321.2.dta
3					2729	1	0	480.609	1438.81	3	1438.8	0.0008	360	371	1	60.93	33	37	0.00023	R	RHPEYAVSVLLR	L				8	110328_WaxPromix10ulA10_NH4OH80ACN.3483.3483.3.dta
3					2730	1	0	720.41	1438.81	2	1438.8	0.0009	360	371	1	40.94	26	37	0.023	R	RHPEYAVSVLLR	L				13	110328_WaxPromix10ulA10_NH4OH80ACN.2040.2040.2.dta
3					2731	1	0	720.41	1438.81	2	1438.8	0.0009	360	371	1	37.93	21	37	0.046	R	RHPEYAVSVLLR	L				12	110328_WaxPromix10ulA10_NH4OH80ACN.2607.2607.2.dta
3					2732	1	0	720.41	1438.81	2	1438.8	0.0011	360	371	1	49.15	22	37	0.0036	R	RHPEYAVSVLLR	L				9	110328_WaxPromix10ulA10_NH4OH80ACN.1731.1731.2.dta
3					2733	1	0	360.709	1438.81	4	1438.8	0.0012	360	371	1	58.99	34	37	0.00036	R	RHPEYAVSVLLR	L				7	110328_WaxPromix10ulA10_NH4OH80ACN.1997.1997.4.dta
3					2734	1	0	720.41	1438.81	2	1438.8	0.0012	360	371	1	45.81	27	37	0.0075	R	RHPEYAVSVLLR	L				13	110328_WaxPromix10ulA10_NH4OH80ACN.1833.1833.2.dta
3					2735	1	0	480.609	1438.81	3	1438.8	0.0013	360	371	1	56.33	28	37	0.00066	R	RHPEYAVSVLLR	L				9	110328_WaxPromix10ulA10_NH4OH80ACN.2746.2746.3.dta
3					2736	1	0	720.41	1438.81	2	1438.8	0.002	360	371	1	37.68	27	37	0.046	R	RHPEYAVSVLLR	L				13	110328_WaxPromix10ulA10_NH4OH80ACN.2517.2517.2.dta
3					2738	1	0	720.411	1438.81	2	1438.8	0.0027	360	371	1	45.55	27	37	0.0084	R	RHPEYAVSVLLR	L				16	110328_WaxPromix10ulA10_NH4OH80ACN.1984.1984.2.dta
3					2959	1	0	739.764	1477.51	2	1477.52	-0.0027	106	117	0	42.91	22	37	0.013	R	ETYGDMADCCEK	Q				8	110328_WaxPromix10ulA10_NH4OH80ACN.6722.6722.2.dta
3					2960	1	0	739.764	1477.51	2	1477.52	-0.0023	106	117	0	80.34	26	36	2.3e-06	R	ETYGDMADCCEK	Q				9	110328_WaxPromix10ulA10_NH4OH80ACN.6000.6000.2.dta
3					2961	1	0	739.764	1477.51	2	1477.52	-0.0015	106	117	0	36.15	18	37	0.062	R	ETYGDMADCCEK	Q				8	110328_WaxPromix10ulA10_NH4OH80ACN.6294.6294.2.dta
3					2962	1	0	739.765	1477.52	2	1477.52	-0.0004	106	117	0	36.18	19	37	0.063	R	ETYGDMADCCEK	Q				8	110328_WaxPromix10ulA10_NH4OH80ACN.5856.5856.2.dta
3					2963	1	0	739.765	1477.52	2	1477.52	-0.0001	106	117	0	54.86	24	37	0.00085	R	ETYGDMADCCEK	Q				9	110328_WaxPromix10ulA10_NH4OH80ACN.6198.6198.2.dta
3					2964	1	0	739.765	1477.52	2	1477.52	0.0003	106	117	0	69.04	23	37	3.6e-05	R	ETYGDMADCCEK	Q				10	110328_WaxPromix10ulA10_NH4OH80ACN.6659.6659.2.dta
3					2965	1	0	739.766	1477.52	2	1477.52	0.0007	106	117	0	77.06	25	37	5.5e-06	R	ETYGDMADCCEK	Q				9	110328_WaxPromix10ulA10_NH4OH80ACN.6152.6152.2.dta
3					2966	1	0	739.766	1477.52	2	1477.52	0.0012	106	117	0	22.23	21	37	1.8	R	ETYGDMADCCEK	Q				8	110328_WaxPromix10ulA10_NH4OH80ACN.6403.6403.2.dta
3					2967	1	0	739.766	1477.52	2	1477.52	0.0017	106	117	0	72.23	24	37	1.7e-05	R	ETYGDMADCCEK	Q				9	110328_WaxPromix10ulA10_NH4OH80ACN.5900.5900.2.dta
3					2968	1	0	739.766	1477.52	2	1477.52	0.0024	106	117	0	35.57	25	37	0.075	R	ETYGDMADCCEK	Q				8	110328_WaxPromix10ulA10_NH4OH80ACN.6245.6245.2.dta
3					2969	1	0	739.767	1477.52	2	1477.52	0.0037	106	117	0	43.49	17	37	0.012	R	ETYGDMADCCEK	Q				9	110328_WaxPromix10ulA10_NH4OH80ACN.6639.6639.2.dta
3					2970	1	0	739.767	1477.52	2	1477.52	0.0039	106	117	0	25.98	20	37	0.69	R	ETYGDMADCCEK	Q				7	110328_WaxPromix10ulA10_NH4OH80ACN.6796.6796.2.dta
3					2996	1	0	740.765	1479.52	2	1477.52	1.9997	106	117	0	33.21	23	37	0.13	R	ETYGDMADCCEK	Q				8	110328_WaxPromix10ulA10_NH4OH80ACN.6809.6809.2.dta
3					2997	1	0	740.765	1479.52	2	1477.52	2	106	117	0	23.36	17	37	1.3	R	ETYGDMADCCEK	Q				7	110328_WaxPromix10ulA10_NH4OH80ACN.6552.6552.2.dta
3					2998	1	0	740.767	1479.52	2	1477.52	2.0027	106	117	0	20.3	18	37	2.5	R	ETYGDMADCCEK	Q				9	110328_WaxPromix10ulA10_NH4OH80ACN.6413.6413.2.dta
3					2999	1	0	740.767	1479.52	2	1477.52	2.0028	106	117	0	25.65		37	0.72	R	ETYGDMADCCEK	Q				8	110328_WaxPromix10ulA10_NH4OH80ACN.6358.6358.2.dta
3					3043	1	0	747.764	1493.51	2	1493.51	0.0016	106	117	0	44.3	27	36	0.0089	R	ETYGDMADCCEK	Q		Oxidation (M)	0.000001000000.0	8	110328_WaxPromix10ulA10_NH4OH80ACN.6366.6366.2.dta
3					3044	1	0	747.764	1493.51	2	1493.51	0.0023	106	117	0	45.48	22	36	0.0067	R	ETYGDMADCCEK	Q		Oxidation (M)	0.000001000000.0	8	110328_WaxPromix10ulA10_NH4OH80ACN.6319.6319.2.dta
3					3045	1	0	748.264	1494.51	2	1493.51	1.0034	106	117	0	37.19	26	37	0.048	R	ETYGDMADCCEK	Q		Oxidation (M)	0.000001000000.0	7	110328_WaxPromix10ulA10_NH4OH80ACN.6426.6426.2.dta
3					3830	1	0	862.918	1723.82	2	1723.83	-0.0048	469	482	0	80.37		44	1.2e-05	R	MPCTEDYLSLILNR	L				10	110328_WaxPromix10ulA10_NH4OH80ACN.2257.2257.2.dta
3					3831	2	0	575.615	1723.82	3	1723.83	-0.0027	469	482	0	24.16	38	44	4.9	R	MPCTEDYLSLILNR	L				9	110328_WaxPromix10ulA10_NH4OH80ACN.2421.2421.3.dta
3					3832	1	0	575.616	1723.83	3	1723.83	-0.0021	469	482	0	45.64		44	0.037	R	MPCTEDYLSLILNR	L				9	110328_WaxPromix10ulA10_NH4OH80ACN.2268.2268.3.dta
3					3833	1	0	575.616	1723.83	3	1723.83	-0.002	469	482	0	42.05		44	0.082	R	MPCTEDYLSLILNR	L				11	110328_WaxPromix10ulA10_NH4OH80ACN.2220.2220.3.dta
3					3834	1	0	862.921	1723.83	2	1723.83	0.0009	469	482	0	94.72		44	4.5e-07	R	MPCTEDYLSLILNR	L				12	110328_WaxPromix10ulA10_NH4OH80ACN.2426.2426.2.dta
3					3835	1	0	862.923	1723.83	2	1723.83	0.0033	469	482	0	85.05	41	44	4.2e-06	R	MPCTEDYLSLILNR	L				12	110328_WaxPromix10ulA10_NH4OH80ACN.2369.2369.2.dta
3					3836	1	0	862.923	1723.83	2	1723.83	0.0034	469	482	0	79.86	37	44	1.4e-05	R	MPCTEDYLSLILNR	L				10	110328_WaxPromix10ulA10_NH4OH80ACN.2313.2313.2.dta
3					3837	1	0	862.923	1723.83	2	1723.83	0.0041	469	482	0	101.26		44	9.6e-08	R	MPCTEDYLSLILNR	L				11	110328_WaxPromix10ulA10_NH4OH80ACN.2209.2209.2.dta
3					3884	1	0	874.355	1746.7	2	1746.7	-0.0027	184	197	0	33.1	23	41	0.38	K	YNGVFQECCQAEDK	G				10	110328_WaxPromix10ulA10_NH4OH80ACN.4210.4210.2.dta
3					3885	1	0	874.355	1746.7	2	1746.7	-0.0025	184	197	0	83.63	32	41	3.4e-06	K	YNGVFQECCQAEDK	G				12	110328_WaxPromix10ulA10_NH4OH80ACN.3962.3962.2.dta
3					3886	1	0	874.355	1746.7	2	1746.7	-0.0024	184	197	0	82.02	32	41	4.9e-06	K	YNGVFQECCQAEDK	G				11	110328_WaxPromix10ulA10_NH4OH80ACN.4008.4008.2.dta
3					3887	1	0	874.355	1746.7	2	1746.7	-0.0024	184	197	0	95.03	31	41	2.4e-07	K	YNGVFQECCQAEDK	G				11	110328_WaxPromix10ulA10_NH4OH80ACN.4053.4053.2.dta
3					3888	1	0	583.24	1746.7	3	1746.7	-0.0012	184	197	0	37.52	28	41	0.14	K	YNGVFQECCQAEDK	G				15	110328_WaxPromix10ulA10_NH4OH80ACN.4021.4021.3.dta
3					3889	1	0	583.24	1746.7	3	1746.7	-0.0001	184	197	0	32.1	28	42	0.49	K	YNGVFQECCQAEDK	G				18	110328_WaxPromix10ulA10_NH4OH80ACN.3975.3975.3.dta
3					3890	1	0	874.356	1746.7	2	1746.7	0.0002	184	197	0	85.24	30	42	2.4e-06	K	YNGVFQECCQAEDK	G				12	110328_WaxPromix10ulA10_NH4OH80ACN.3914.3914.2.dta
3					3892	1	0	874.356	1746.7	2	1746.7	0.0005	184	197	0	73.04	30	42	4e-05	K	YNGVFQECCQAEDK	G				12	110328_WaxPromix10ulA10_NH4OH80ACN.4101.4101.2.dta
3					3893	1	0	583.24	1746.7	3	1746.7	0.0006	184	197	0	20.66	22	42	6.9	K	YNGVFQECCQAEDK	G				10	110328_WaxPromix10ulA10_NH4OH80ACN.3931.3931.3.dta
3					3894	1	0	874.357	1746.7	2	1746.7	0.0022	184	197	0	62.35	32	42	0.00046	K	YNGVFQECCQAEDK	G				12	110328_WaxPromix10ulA10_NH4OH80ACN.4154.4154.2.dta
3					3895	1	0	874.357	1746.7	2	1746.7	0.0026	184	197	0	49.55	26	42	0.009	K	YNGVFQECCQAEDK	G				15	110328_WaxPromix10ulA10_NH4OH80ACN.4269.4269.2.dta
3					3896	1	0	874.357	1746.7	2	1746.7	0.0026	184	197	0	70.04	33	42	8.1e-05	K	YNGVFQECCQAEDK	G				10	110328_WaxPromix10ulA10_NH4OH80ACN.3875.3875.2.dta
3					3898	1	0	874.848	1747.68	2	1747.68	-0.0002	184	197	0	42	24	41	0.042	K	YNGVFQECCQAEDK	G		Deamidated (NQ)	0.00000400000000.0	12	110328_WaxPromix10ulA10_NH4OH80ACN.6290.6290.2.dta
3					3899	1	0	874.848	1747.68	2	1747.68	0.0003	184	197	0	74.43	32	41	2.5e-05	K	YNGVFQECCQAEDK	G		Deamidated (NQ)	0.04000000000000.0	11	110328_WaxPromix10ulA10_NH4OH80ACN.6102.6102.2.dta
3					3900	1	0	874.849	1747.68	2	1747.68	0.0011	184	197	0	73.09	31	41	3.3e-05	K	YNGVFQECCQAEDK	G		Deamidated (NQ)	0.04000000000000.0	12	110328_WaxPromix10ulA10_NH4OH80ACN.5298.5298.2.dta
3					3901	1	0	874.849	1747.68	2	1747.68	0.0021	184	197	0	91.56	26	41	4.8e-07	K	YNGVFQECCQAEDK	G		Deamidated (NQ)	0.04000000000000.0	12	110328_WaxPromix10ulA10_NH4OH80ACN.6151.6151.2.dta
3					3902	1	0	874.849	1747.68	2	1747.68	0.0021	184	197	0	61.23	30	41	0.00051	K	YNGVFQECCQAEDK	G		Deamidated (NQ)	0.04000000000000.0	12	110328_WaxPromix10ulA10_NH4OH80ACN.6388.6388.2.dta
3					3904	1	0	874.85	1747.68	2	1747.68	0.0028	184	197	0	60.94	26	41	0.00058	K	YNGVFQECCQAEDK	G		Deamidated (NQ)	0.04000000000000.0	12	110328_WaxPromix10ulA10_NH4OH80ACN.6197.6197.2.dta
[truncated: 6,330 more rows]
